# Supplementary material
Source: publisher figshare collection journal article supplement (https://diabetesjournals.figshare.com/articles/dataset/_/18631502)
Supplement: Supplementary file 1 [file 1]

**Adipocyte-specific modulation of KLF14 expression in mice leads to sex-dependent impacts on adiposity  
and lipid metabolism**

**Running title: KLF14 is sex-dimorphic in mouse metabolism**

Qianyi Yang<sup>1</sup>, Jameson Hinkle<sup>1</sup>, Jordan N. Reed<sup>1,2</sup>, Redouane Aherrahrou<sup>1</sup>, Zhiwen Xu<sup>3</sup>, Thurl E. Harris<sup>4</sup>, Erin  
J. Stephenson<sup>5</sup>, Kiran Musunuru<sup>6,7,8</sup>, Susanna R. Keller<sup>9</sup>, Mete Civelek<sup>1,2</sup>

<sup>1</sup>Center for Public Health Genomics, School of Medicine, University of Virginia, Charlottesville, VA 22908,  
USA.

<sup>2</sup>Department of Biomedical Engineering, School of Engineering and Applied Science, University of Virginia,  
Charlottesville, VA 22908, USA.

<sup>3</sup>Department of Chemistry, College of Arts and Sciences, University of Virginia, Charlottesville, VA 22908,  
USA.

<sup>4</sup>Department of Pharmacology, School of Medicine, University of Virginia, Charlottesville, VA 22908, USA.

<sup>5</sup>Department of Anatomy, College of Graduate Studies & Chicago College of Osteopathic Medicine,  
Midwestern University, Downers Grove, IL 60515, USA.

<sup>6</sup>Cardiovascular Institute, Perelman School of Medicine at the University of Pennsylvania, Philadelphia, PA,  
19104, USA.

<sup>7</sup>Division of Cardiovascular Medicine, Department of Medicine, Perelman School of Medicine at the University  
of Pennsylvania, Philadelphia, PA, 19104, USA.

<sup>8</sup>Department of Genetics, Perelman School of Medicine at the University of Pennsylvania, Philadelphia, PA,  
19104, USA.

<sup>9</sup>Division of Endocrinology and Metabolism, Department of Medicine, School of Medicine, University of  
Virginia, Charlottesville, VA, 22908, USA.

**Corresponding authors:**

Qianyi Yang, Ph.D. and Mete Civelek, PhD

University of Virginia

Center for Public Health Genomics

Old Med School 3836

PO Box 800717

Charlottesville, VA 22908-0717

Office Number: 434-243-1669

Fax Number: 434-982-1815

E-mail: [qy5sy@virginia.edu](mailto:qy5sy@virginia.edu) and [mete@virginia.edu](mailto:mete@virginia.edu)

**Word count: 6483**

**Number of tables: 2 (supplemental)**

**Number of figures: 8 main figures and 5 supplemental figures**

SUPPLEMENTAL FIGURES:

Supplemental Figure 1

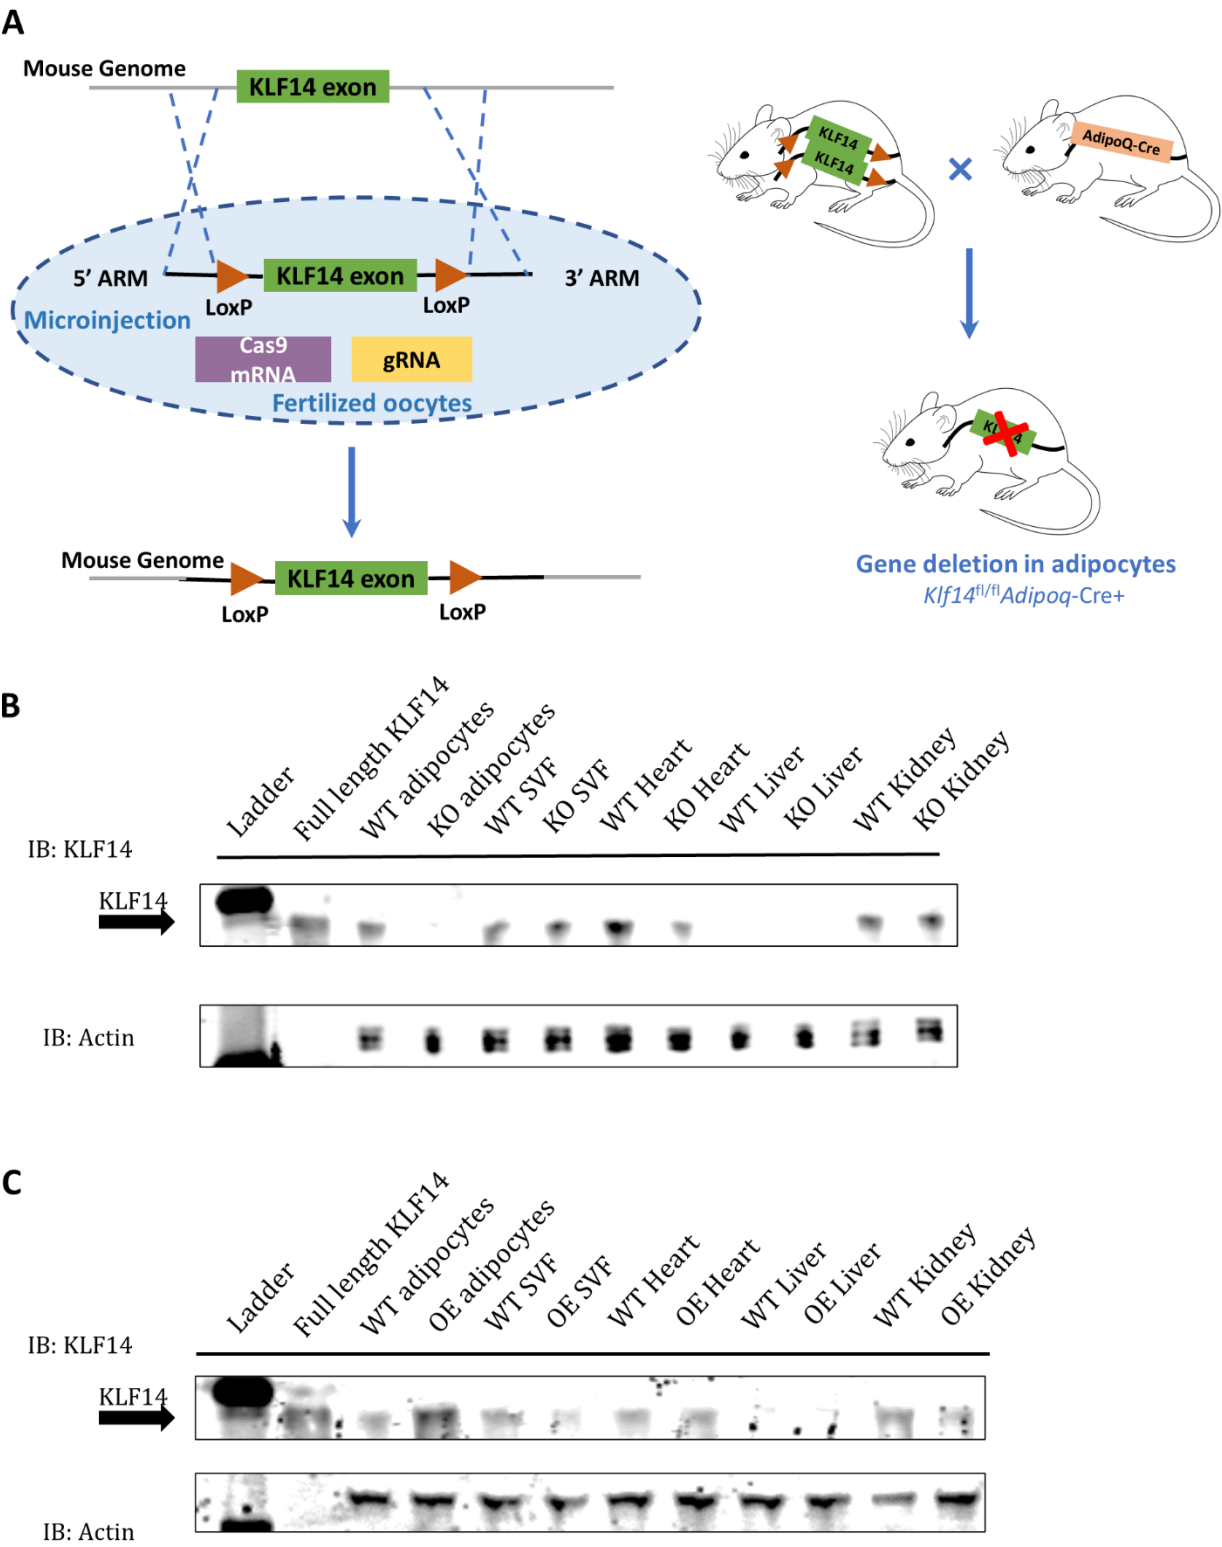

Supplemental Figure 2

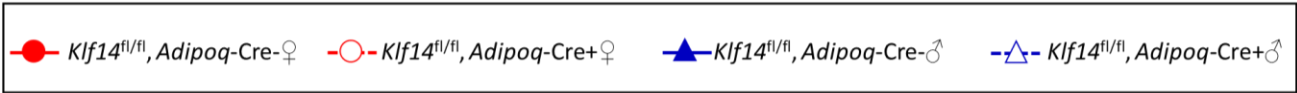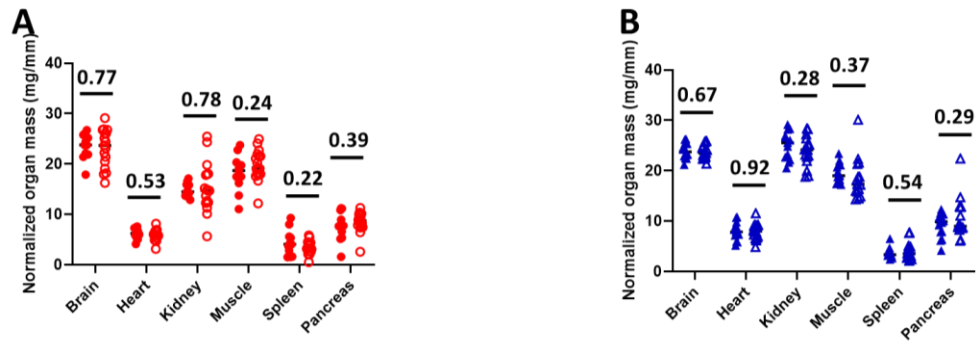

Supplemental Figure 3

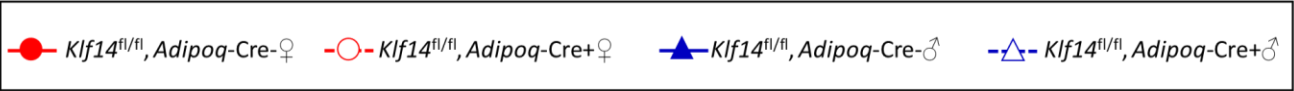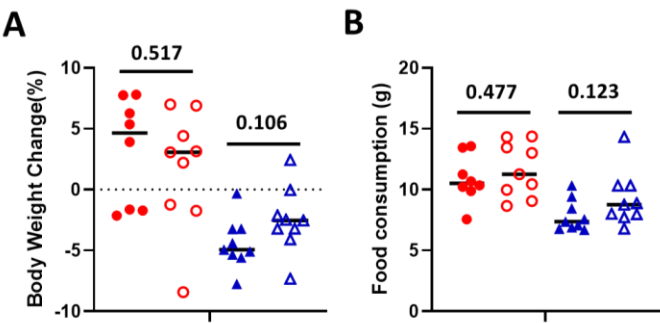

Supplemental Figure 4

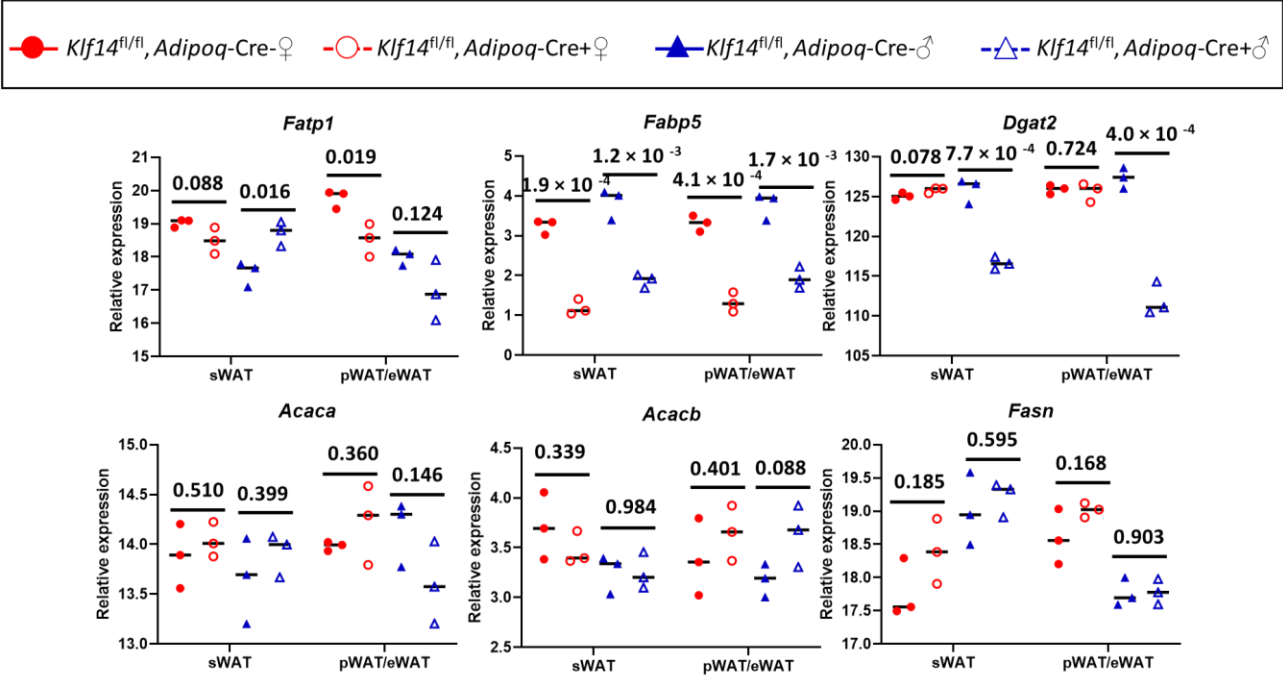

Supplemental Figure 5

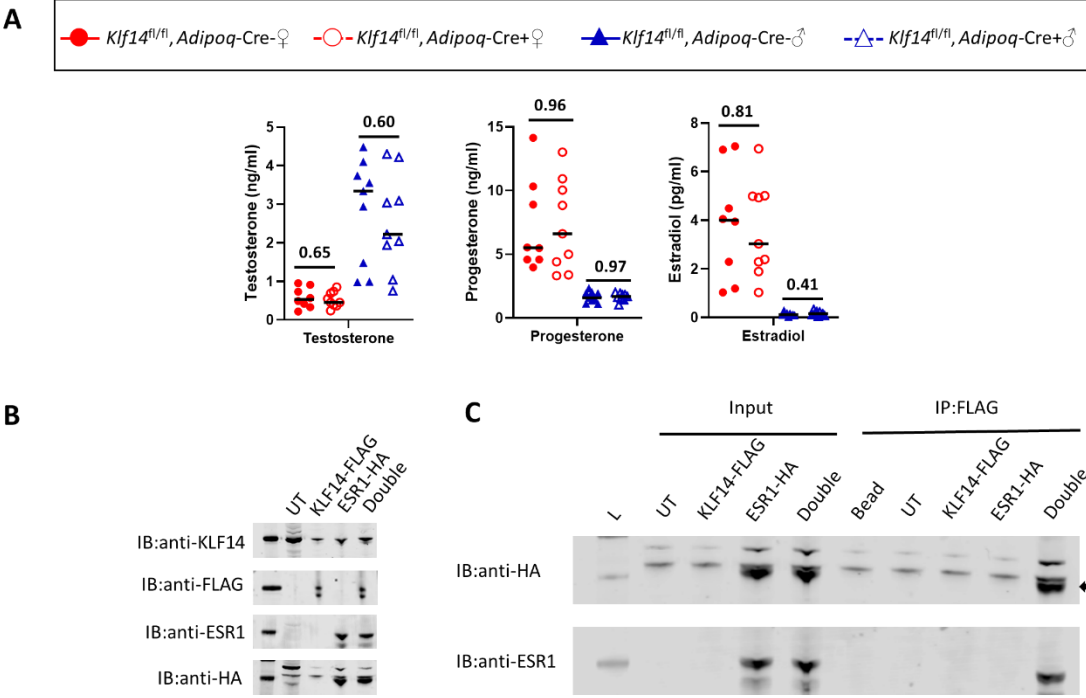

## SUPPLEMENTAL FIGURE LEGENDS

**Supplemental Figure 1:** Characterization of transgenic mice. **(A)** Targeting strategy for deletion of *Klf14* in mouse adipocytes. **(B)** KLF14 protein level in adipocytes, stromal vascular fraction (SVF), heart, liver and kidney of wild-type (WT) and knockout (KO) mice. **(C)** KLF14 protein level in adipocytes, stromal vascular fraction (SVF), heart, liver and kidney of wild-type (WT) and overexpression (OE) mice.

**Supplemental Figure 2:** Tissue weights normalized to tibia length in adipocyte-specific *Klf14* knockout and wild type **(A)** female and **(B)** male mice.  $N_{\text{Female, Adipoq-Cre-}} = 11$ ,  $N_{\text{Female, Adipoq-Cre+}} = 17$ ,  $N_{\text{Male, Adipoq-Cre-}} = 14$ ,  $N_{\text{Male, Adipoq-Cre+}} = 14$ .

**Supplemental Figure 3:** **(A)** Body weight change and **(B)** food consumption during the three-day period in metabolic cages.  $N_{\text{Female Adipoq-Cre-}} = 8$ ,  $N_{\text{Female Adipoq-Cre+}} = 9$ ,  $N_{\text{Male Adipoq-Cre-}} = 9$ ,  $N_{\text{Male Adipoq-Cre+}} = 9$ .

**Supplemental Figure 4:** mRNA expression of fatty acid uptake and metabolism genes *Fatp1*, *Fabp5*, *Dgat2*, *Acaca*, *Acacb*, *Fasn* and in isolated mature adipocytes.  $N = 3$  mice per genotype and sex. Relative gene expression, normalized to GAPDH levels, was calculated using the  $2^{-\Delta\Delta CT}$  method. *P*-values were calculated using two-tailed unpaired Student's *t* -test.

**Supplemental Figure 5:** **(A)** Sex hormone Testosterone, Progesterone and Estradiol levels in serum of adipocyte *Klf14*-deficient female and male mice and control littermates at euthanasia after 21 weeks of HFD.  $N_{\text{Female Adipoq-Cre-}} = 8$ ,  $N_{\text{Female Adipoq-Cre+}} = 9$ ,  $N_{\text{Male Adipoq-Cre-}} = 9$ ,  $N_{\text{Male Adipoq-Cre+}} = 9$ . **(B)** KLF14, FLAG, ESR1 and HA levels were measured in HEK293 cells that are untransfected (UT) or transfected with either *KLF14-FLAG* or *ESR1-HA* or both. **(C)** Abovementioned HEK293 cells were immunoprecipitated with FLAG antibody-conjugated magnetic beads. Samples were immunoblotted with anti-ESR1 or anti-HA antibodies.



Supplemental table 1: Mouse genotyping primer list.

| Name             | Forward                | Reverse                    | Amplicon |
|------------------|------------------------|----------------------------|----------|
| Adipoq_Klf14_Cre | GAACCTGATGGACATGTTCAGG | AGTGCGTTTCGAACGCTAGAGCCTGT | 250bp    |
| Adipoq_Klf14_OE  | GGCCTACTACAAGTCGTCGC   | CCGGGCTGCAGGAATTCGAT       | 489bp    |

Supplemental table 2: qPCR primer list.

| Gene  | Forward                    | Reverse                  | Accession ID   | Reference |
|-------|----------------------------|--------------------------|----------------|-----------|
| Fatp1 | GGCTCCTGGAGCAGGAACA        | ACGGAAGTCCCAGAAACCAA     | NM_011977.4    | (1)       |
| Fatp4 | ACGATGTTTCCTGCTGAGTGGTA    | CTCTCCGACCTGCCACAGA      | NM_011989.5    | (1)       |
| Fabp4 | ATGTGCGACCAGTTTGTG         | TTTGCCATCCCCTTCTG        | NM_024406.3    | (2)       |
| Fabp5 | GCTGATGGCAGAAAACTCAGA      | CCTGATGCTGAACCAATGCA     | NM_001272098.1 | (3)       |
| Acc1  | CCTCCGTCAGCTCAGATACA       | TTTACTAGGTGCAAGCCAGACA   | NM_133360.2    | (4)       |
| Fasn  | GCTGCGGAACTTCAGGAAAT       | AGAGACGTGTCACTCCTGGACTT  | NM_007988.3    | (5)       |
| Acc2  | ACAGAGATTT CACCGTTGCGT     | CGCAGCGATGCCATTGT        | NM_133904      | (6)       |
| Dgat1 | ACCGCGAGTTCTACAGAGATTGGT   | ACAGCTGCATTGCCATAGTTCCCT | NM_010046.3    | (7)       |
| Dgat2 | TGGGTCCAGAAGAAGTTCCAGAAGTA | ACCTCAGTCTCTGGAAGGCCAAAT | NM_026384.3    | (7)       |
| Hsl   | GCTGGGCTGTCAAGCACTGT       | GTAAGTGGGTAGGCTGCCAT     | NM_001039507.2 | (8)       |
| Atgl  | TGTGGCCTCATTCCTCCTAC       | TCGTGGATGTTGGTGGAGCT     | NM_001163689.1 | (8)       |
| Gapdh | CTCCCACTCTTCCACCTTCG       | GCCTCTCTTGCTCAGTGTCC     | NM_001289726.1 | (9)       |

1. Mishima T, Miner JH, Morizane M, Stahl A, Sadovsky Y. The Expression and Function of Fatty Acid Transport Protein-2 and -4 in the Murine Placenta. *PLoS One* [Internet]. 2011 Oct 20 [cited 2021 Jun 14];6(10). Available from: <https://www.ncbi.nlm.nih.gov/pmc/articles/PMC3197585/>
2. Gan L, Liu Z, Cao W, Zhang Z, Sun C. FABP4 reversed the regulation of leptin on mitochondrial fatty acid oxidation in mice adipocytes. *Sci Rep* [Internet]. 2015 Aug 27 [cited 2021 Jun 14];5(1):13588. Available from: <https://www.nature.com/articles/srep13588>
3. Senga S, Kawaguchi K, Kobayashi N, Ando A, Fujii H. A novel fatty acid-binding protein 5-estrogen-related receptor  $\alpha$  signaling pathway promotes cell growth and energy metabolism in prostate cancer cells. *Oncotarget* [Internet]. 2018 Aug 3 [cited 2021 Jun 14];9(60):31753–70. Available from: <https://www.ncbi.nlm.nih.gov/pmc/articles/PMC6114981/>
4. Ip W, Shao W, Song Z, Chen Z, Wheeler MB, Jin T. Liver-specific expression of dominant-negative transcription factor 7-like 2 causes progressive impairment in glucose homeostasis. *Diabetes*. 2015 Jun;64(6):1923–32.
5. Kim C-W, Addy C, Kusunoki J, Anderson NN, Deja S, Fu X, et al. Acetyl CoA Carboxylase Inhibition Reduces Hepatic Steatosis but Elevates Plasma Triglycerides in Mice and Humans: A Bedside to Bench Investigation. *Cell Metabolism* [Internet]. 2017 Aug 1 [cited 2021 Jun 14];26(2):394-406.e6. Available from: <https://www.sciencedirect.com/science/article/pii/S1550413117304308>
6. Hepatic De Novo Lipogenesis Is Present in Liver-Specific ACC1-Deficient Mice [Internet]. *Molecular and Cellular Biology*. [cited 2021 Jun 14]. Available from: <https://journals.asm.org/doi/abs/10.1128/MCB.01122-06>
7. Lee B, Fast AM, Zhu J, Cheng J-X, Buhman KK. Intestine-specific expression of acyl CoA:diacylglycerol acyltransferase 1 reverses resistance to diet-induced hepatic steatosis and obesity in *Dgat1*<sup>-/-</sup> mice. *J Lipid Res* [Internet]. 2010 Jul [cited 2021 Jun 14];51(7):1770–80. Available from: <https://www.ncbi.nlm.nih.gov/pmc/articles/PMC2882751/>
8. Reid BN, Ables GP, Otlivanchik OA, Schoiswohl G, Zechner R, Blaner WS, et al. Hepatic Overexpression of Hormone-sensitive Lipase and Adipose Triglyceride Lipase Promotes Fatty Acid Oxidation, Stimulates Direct Release of Free Fatty Acids, and Ameliorates Steatosis. *J Biol Chem* [Internet]. 2008 May 9 [cited 2021 Jun 14];283(19):13087–99. Available from: <https://www.ncbi.nlm.nih.gov/pmc/articles/PMC2442319/>
9. Ruiz-Villalba A, Mattiotti A, Gunst QD, Cano-Ballesteros S, van den Hoff MJB, Ruijter JM. Reference genes for gene expression studies in the mouse heart. *Sci Rep* [Internet]. 2017 Feb 2 [cited 2021 Jun 22];7(1):24. Available from: <https://www.nature.com/articles/s41598-017-00043-9>
