# Supplementary material
Source: publisher figshare collection journal article supplement (https://diabetesjournals.figshare.com/articles/dataset/_/18631502)
Supplement: Supplementary file 1 [file 1]

## Sheet: BodyWeight and Composition_Raw
Cohort	Week	From_Box	Mouse_index	Mark	Sex	Genotype	Fat(g)	Lean(g)	NMR Total Weight	Mass (g)	Propfat_bodymass	Leamass_perc	Fat/Lean
2	8	79	2	RC	F	Cre+	1.83	15.17	17	18.7	0.097861	0.81123	0.120633
2	8	80	5	RC	F	Cre+	2.84	19.37	22.21	24.5	0.115918	0.790612	0.146618
2	8	83	15	LC	F	Cre+	4.65	11.3	15.95	19.6	0.237245	0.576531	0.411504
2	8	85	24	RC	F	Cre+	2.36	13.69	16.05	17.1	0.138012	0.800585	0.172389
2	8	87	31	RC	F	Cre+	2.44	15.55	17.99	20.3	0.120197	0.76601	0.156913
2	8	87	32	BC	F	Cre+	3.32	13.56	16.88	17.9	0.185475	0.757542	0.244838
2	8	87	34	RP	F	Cre+	2.85	15.62	18.47	19.6	0.145408	0.796939	0.182458
2	8	89	37	LC	F	Cre+	2.74	13.4	16.14	17	0.161176	0.788235	0.204478
2	8	89	38	RC	F	Cre+	3.2	13.85	17.05	17.8	0.179775	0.77809	0.231047
2	8	89	39	BC	F	Cre+	2.87	15.66	18.53	19.3	0.148705	0.811399	0.183269
2	8	89	40	LP	F	Cre+	2.89	15.16	18.05	19.1	0.151309	0.793717	0.190633
2	8	89	41	RP	F	Cre+	2.63	14.4	17.03	17.7	0.148588	0.813559	0.182639
2	8	90	42	LC	F	Cre+	2.95	15.61	18.56	19.2	0.153646	0.813021	0.188981
2	8	90	43	RC	F	Cre+	2.55	14.65	17.2	18.2	0.14011	0.804945	0.174061
2	8	90	45	LP	F	Cre+	2.93	14.1	17.03	17.7	0.165537	0.79661	0.207801
2	8	94	57	LC	F	Cre+	3.18	12.75	15.93	16	0.19875	0.796875	0.249412
2	8	94	58	RC	F	Cre+	2.94	16.4	19.34	19.5	0.150769	0.841026	0.179268
2	12	79	2	RC	F	Cre+	2.03	16.83	18.86	20.7	0.0980676	0.813043	0.120618
2	12	80	5	RC	F	Cre+	3.96	22.24	26.2	28.1	0.140925	0.791459	0.178058
2	12	83	15	LC	F	Cre+	4.01	14.45	18.46	19.9	0.201508	0.726131	0.277509
2	12	85	24	RC	F	Cre+	3.26	16.06	19.32	19.9	0.163819	0.807035	0.202989
2	12	87	31	RC	F	Cre+	5.68	15.83	21.51	23.1	0.245887	0.685281	0.358812
2	12	87	32	BC	F	Cre+	3.91	16.65	20.56	21.6	0.181019	0.770833	0.234835
2	12	87	34	RP	F	Cre+	4.11	15.93	20.04	21.8	0.188532	0.730734	0.258004
2	12	89	37	LC	F	Cre+	4.06	14.09	18.15	19.4	0.209278	0.726289	0.288148
2	12	89	38	RC	F	Cre+	4.59	15.88	20.47	21.9	0.209589	0.725114	0.289043
2	12	89	39	BC	F	Cre+	6.34	14.64	20.98	22.3	0.284305	0.656502	0.43306
2	12	89	40	LP	F	Cre+	4.54	16.22	20.76	22	0.206364	0.737273	0.279901
2	12	89	41	RP	F	Cre+	4.11	15.27	19.38	20.8	0.197596	0.734135	0.269155
2	12	90	42	LC	F	Cre+	3.71	16.36	20.07	21.6	0.171759	0.757407	0.226773
2	12	90	43	RC	F	Cre+	5.6	12.82	18.42	19.8	0.282828	0.647475	0.436817
2	12	90	45	LP	F	Cre+	4.9	14.7	19.6	21.3	0.230047	0.690141	0.333333
2	12	94	57	LC	F	Cre+	4.4	13.03	17.43	18.8	0.234043	0.693085	0.337682
2	12	94	58	RC	F	Cre+	3.65	16.96	20.61	22.1	0.165158	0.767421	0.215212
2	16	79	2	RC	F	Cre+	3.4	16.63	20.03	22	0.154545	0.755909	0.20445
2	16	80	5	RC	F	Cre+	4.16	18.34	22.5	24.9	0.167068	0.736546	0.226827
2	16	83	15	LC	F	Cre+	3.71	15.67	19.38	21.1	0.175829	0.742654	0.236758
2	16	85	24	RC	F	Cre+	3.28	16.69	19.97	21.8	0.150459	0.765596	0.196525
2	16	87	31	RC	F	Cre+	7.9	16.54	24.44	25.8	0.306202	0.641085	0.47763
2	16	87	32	BC	F	Cre+	4.67	16.21	20.88	23	0.203043	0.704783	0.288094
2	16	87	34	RP	F	Cre+	5.2	16.47	21.67	23.4	0.222222	0.703846	0.315726
2	16	89	37	LC	F	Cre+	4.62	14.94	19.56	21.7	0.212903	0.688479	0.309237
2	16	89	38	RC	F	Cre+	6.05	17.16	23.21	24.9	0.242972	0.689157	0.352564
2	16	89	39	BC	F	Cre+	6.44	16.1	22.54	24	0.268333	0.670833	0.4
2	16	89	40	LP	F	Cre+	5.36	16.33	21.69	23.5	0.228085	0.694894	0.32823
2	16	89	41	RP	F	Cre+	5.07	15.86	20.93	22.8	0.222368	0.695614	0.319672
2	16	90	42	LC	F	Cre+	6.01	17.03	23.04	24.5	0.245306	0.695102	0.352907
2	16	90	43	RC	F	Cre+	3.66	15.08	18.74	20.4	0.179412	0.739216	0.242706
2	16	90	45	LP	F	Cre+	4.89	15.66	20.55	22.2	0.22027	0.705405	0.312261
2	16	94	57	LC	F	Cre+	3.99	14.57	18.56	20.2	0.197525	0.721287	0.27385
2	16	94	58	RC	F	Cre+	3.72	17.74	21.46	23.4	0.158974	0.75812	0.209696
2	20	79	2	RC	F	Cre+	3.76	16.86	20.62	22.6	0.166372	0.746018	0.223013
2	20	80	5	RC	F	Cre+	5.87	18.67	24.54	26.3	0.223194	0.709886	0.314408
2	20	83	15	LC	F	Cre+	3.45	16.77	20.22	22	0.156818	0.762273	0.205725
2	20	85	24	RC	F	Cre+	3.88	16.62	20.5	22.6	0.171681	0.735398	0.233454
2	20	87	31	RC	F	Cre+	8.13	18.21	26.34	28	0.290357	0.650357	0.446458
2	20	87	32	BC	F	Cre+	5.3	16.61	21.91	23.9	0.221757	0.694979	0.319085
2	20	87	34	RP	F	Cre+	7.4	17.37	24.77	26.6	0.278195	0.653008	0.426022
2	20	89	37	LC	F	Cre+	4.77	15.31	20.08	21.7	0.219816	0.70553	0.311561
2	20	89	38	RC	F	Cre+	4.57	17.72	22.29	24	0.190417	0.738333	0.257901
2	20	89	39	BC	F	Cre+	5.36	16.47	21.83	23.5	0.228085	0.700851	0.32544
2	20	89	40	LP	F	Cre+	4.14	17.53	21.67	23.5	0.17617	0.745957	0.236167
2	20	89	41	RP	F	Cre+	4.96	15.28	20.24	22.3	0.222422	0.685202	0.324607
2	20	90	42	LC	F	Cre+	5.47	17.69	23.16	24.8	0.220565	0.713306	0.309214
2	20	90	43	RC	F	Cre+	4.4	15.16	21	21	0.209524	0.721905	0.290237
2	20	90	45	LP	F	Cre+	5.03	15.91	20.94	22.4	0.224554	0.710268	0.316153
2	20	94	57	LC	F	Cre+	3.92	15.98	19.9	21.3	0.184038	0.750235	0.245307
2	20	94	58	RC	F	Cre+	5.21	17.57	22.78	24.6	0.211789	0.714228	0.296528

## Sheet: Organ Weights_Raw
Mouse	Organ	Totalmass	Tibialength_mm	Normalized Mass_mg	Sex	Genotype
1	Heart	90	17.87	5.03637	F	Cre-
1	Liver	940	17.87	52.6021	F	Cre-
1	Panc	140	17.87	7.83436	F	Cre-
1	Spleen	100	17.87	5.59597	F	Cre-
1	Kidney	250	17.87	13.9899	F	Cre-
1	Epi	50	17.87	2.79799	F	Cre-
1	Subcu	100	17.87	5.59597	F	Cre-
1	Om	-10	17.87	-0.559597	F	Cre-
1	Secum	240	17.87	13.4303	F	Cre-
1	Brain	450	17.87	25.1819	F	Cre-
1	Muscle	290	17.87	16.2283	F	Cre-
2	Heart	140	17.17	8.15376	F	Cre+
2	Liver	950	17.17	55.3291	F	Cre+
2	Panc	150	17.17	8.73617	F	Cre+
2	Spleen	100	17.17	5.82411	F	Cre+
2	Kidney	340	17.17	19.802	F	Cre+
2	Epi	40	17.17	2.32964	F	Cre+
2	Subcu	90	17.17	5.2417	F	Cre+
2	Om	20	17.17	1.16482	F	Cre+
2	Secum	350	17.17	20.3844	F	Cre+
2	Brain	500	17.17	29.1206	F	Cre+
2	Muscle	370	17.17	21.5492	F	Cre+
3	Heart	140	18.71	7.48263	F	Cre-
3	Liver	830	18.71	44.3613	F	Cre-
3	Panc	210	18.71	11.2239	F	Cre-
3	Spleen	100	18.71	5.34474	F	Cre-
3	Kidney	320	18.71	17.1032	F	Cre-
3	Epi	100	18.71	5.34474	F	Cre-
3	Subcu	110	18.71	5.87921	F	Cre-
3	Om	#VALUE!	18.71	#VALUE!	F	Cre-
3	Secum	290	18.71	15.4997	F	Cre-
3	Brain	500	18.71	26.7237	F	Cre-
3	Muscle	380	18.71	20.31	F	Cre-
4	Heart	120	19.37	6.19515	F	Cre-
4	Liver	970	19.37	50.0774	F	Cre-
4	Panc	150	19.37	7.74393	F	Cre-
4	Spleen	180	19.37	9.29272	F	Cre-
4	Kidney	320	19.37	16.5204	F	Cre-
4	Epi	50	19.37	2.58131	F	Cre-
4	Subcu	90	19.37	4.64636	F	Cre-
4	Om	20	19.37	1.03252	F	Cre-
4	Secum	380	19.37	19.618	F	Cre-
4	Brain	460	19.37	23.7481	F	Cre-
4	Muscle	460	19.37	23.7481	F	Cre-
5	Heart	110	18.44	5.96529	F	Cre+
5	Liver	1050	18.44	56.9414	F	Cre+
5	Panc	180	18.44	9.76139	F	Cre+
5	Spleen	70	18.44	3.7961	F	Cre+
5	Kidney	280	18.44	15.1844	F	Cre+
5	Epi	80	18.44	4.33839	F	Cre+
5	Subcu	160	18.44	8.67679	F	Cre+
5	Om	-10	18.44	-0.542299	F	Cre+
5	Secum	330	18.44	17.8959	F	Cre+
5	Brain	450	18.44	24.4035	F	Cre+
5	Muscle	460	18.44	24.9458	F	Cre+
6	Heart	90	17.5	5.14286	M	Cre-
6	Liver	1380	17.5	78.8571	M	Cre-
6	Panc	170	17.5	9.71429	M	Cre-
6	Spleen	70	17.5	4	M	Cre-
6	Kidney	510	17.5	29.1429	M	Cre-
6	Epi	1040	17.5	59.4286	M	Cre-
6	Subcu	910	17.5	52	M	Cre-
6	Om	20	17.5	1.14286	M	Cre-
6	Secum	310	17.5	17.7143	M	Cre-
6	Brain	460	17.5	26.2857	M	Cre-
6	Muscle	-1460	17.5	-83.4286	M	Cre-
7	Heart	140	17.97	7.79076	M	Cre+
7	Liver	1510	17.97	84.0289	M	Cre+
7	Panc	230	17.97	12.7991	M	Cre+
7	Spleen	60	17.97	3.3389	M	Cre+
7	Kidney	510	17.97	28.3806	M	Cre+
7	Epi	970	17.97	53.9789	M	Cre+
7	Subcu	480	17.97	26.7112	M	Cre+
7	Om	20	17.97	1.11297	M	Cre+
7	Secum	440	17.97	24.4853	M	Cre+
7	Brain	450	17.97	25.0417	M	Cre+
7	Muscle	260	17.97	14.4686	M	Cre+
8	Heart	150	18.97	7.90722	M	Cre+
8	Liver	1640	18.97	86.4523	M	Cre+
8	Panc	210	18.97	11.0701	M	Cre+
8	Spleen	40	18.97	2.10859	M	Cre+
8	Kidney	440	18.97	23.1945	M	Cre+
8	Epi	910	18.97	47.9705	M	Cre+
8	Subcu	640	18.97	33.7375	M	Cre+
8	Om	20	18.97	1.0543	M	Cre+
8	Secum	360	18.97	18.9773	M	Cre+
8	Brain	470	18.97	24.776	M	Cre+
8	Muscle	310	18.97	16.3416	M	Cre+
9	Heart	170	19.49	8.72242	M	Cre+
9	Liver	1700	19.49	87.2242	M	Cre+
9	Panc	170	19.49	8.72242	M	Cre+
9	Spleen	70	19.49	3.59159	M	Cre+
9	Kidney	470	19.49	24.1149	M	Cre+
9	Epi	1350	19.49	69.2663	M	Cre+
9	Subcu	730	19.49	37.4551	M	Cre+
9	Om	-10	19.49	-0.513084	M	Cre+
9	Secum	230	19.49	11.8009	M	Cre+
9	Brain	470	19.49	24.1149	M	Cre+
9	Muscle	290	19.49	14.8794	M	Cre+
10	Heart	170	18.6	9.13978	M	Cre+
10	Liver	910	18.6	48.9247	M	Cre+
10	Panc	170	18.6	9.13978	M	Cre+
10	Spleen	50	18.6	2.68817	M	Cre+
10	Kidney	470	18.6	25.2688	M	Cre+
10	Epi	1010	18.6	54.3011	M	Cre+
10	Subcu	530	18.6	28.4946	M	Cre+
10	Om	#VALUE!	18.6	#VALUE!	M	Cre+
10	Secum	400	18.6	21.5054	M	Cre+
10	Brain	430	18.6	23.1183	M	Cre+
10	Muscle	560	18.6	30.1075	M	Cre+
11	Heart	180	19.78	9.1001	M	Cre+
11	Liver	1040	19.78	52.5784	M	Cre+
11	Panc	120	19.78	6.06673	M	Cre+
11	Spleen	50	19.78	2.52781	M	Cre+
11	Kidney	450	19.78	22.7503	M	Cre+
11	Epi	450	19.78	22.7503	M	Cre+
11	Subcu	320	19.78	16.178	M	Cre+
11	Om	#VALUE!	19.78	#VALUE!	M	Cre+
11	Secum	390	19.78	19.7169	M	Cre+
11	Brain	450	19.78	22.7503	M	Cre+
11	Muscle	340	19.78	17.1891	M	Cre+
12	Heart	150	20.59	7.28509	M	Cre+
12	Liver	880	20.59	42.7392	M	Cre+
12	Panc	170	20.59	8.25644	M	Cre+
12	Spleen	50	20.59	2.42836	M	Cre+
12	Kidney	390	20.59	18.9412	M	Cre+
12	Epi	570	20.59	27.6833	M	Cre+
12	Subcu	220	20.59	10.6848	M	Cre+
12	Om	-20	20.59	-0.971345	M	Cre+
12	Secum	320	20.59	15.5415	M	Cre+
12	Brain	460	20.59	22.3409	M	Cre+
12	Muscle	330	20.59	16.0272	M	Cre+
13	Heart	140	18.98	7.37619	M	Cre-
13	Liver	810	18.98	42.6765	M	Cre-
13	Panc	120	18.98	6.32244	M	Cre-
13	Spleen	50	18.98	2.63435	M	Cre-
13	Kidney	410	18.98	21.6017	M	Cre-
13	Epi	660	18.98	34.7734	M	Cre-
13	Subcu	350	18.98	18.4405	M	Cre-
13	Om	-10	18.98	-0.52687	M	Cre-
13	Secum	360	18.98	18.9673	M	Cre-
13	Brain	460	18.98	24.236	M	Cre-
13	Muscle	360	18.98	18.9673	M	Cre-
14	Heart	170	18.3	9.28962	M	Cre+
14	Liver	950	18.3	51.9126	M	Cre+
14	Panc	160	18.3	8.74317	M	Cre+
14	Spleen	90	18.3	4.91803	M	Cre+
14	Kidney	460	18.3	25.1366	M	Cre+
14	Epi	500	18.3	27.3224	M	Cre+
14	Subcu	150	18.3	8.19672	M	Cre+
14	Om	-20	18.3	-1.0929	M	Cre+
14	Secum	270	18.3	14.7541	M	Cre+
14	Brain	430	18.3	23.4973	M	Cre+
14	Muscle	390	18.3	21.3115	M	Cre+
15	Heart	130	19.1	6.80628	F	Cre+
15	Liver	860	19.1	45.0262	F	Cre+
15	Panc	170	19.1	8.90052	F	Cre+
15	Spleen	50	19.1	2.6178	F	Cre+
15	Kidney	280	19.1	14.6597	F	Cre+
15	Epi	140	19.1	7.32984	F	Cre+
15	Subcu	160	19.1	8.37696	F	Cre+
15	Om	-30	19.1	-1.57068	F	Cre+
15	Secum	260	19.1	13.6126	F	Cre+
15	Brain	480	19.1	25.1309	F	Cre+
15	Muscle	460	19.1	24.0838	F	Cre+
16	Heart	110	18.85	5.83554	F	Cre-
16	Liver	970	18.85	51.4589	F	Cre-
16	Panc	210	18.85	11.1406	F	Cre-
16	Spleen	80	18.85	4.24403	F	Cre-
16	Kidney	300	18.85	15.9151	F	Cre-
16	Epi	50	18.85	2.65252	F	Cre-
16	Subcu	100	18.85	5.30504	F	Cre-
16	Om	#VALUE!	18.85	#VALUE!	F	Cre-
16	Secum	260	18.85	13.7931	F	Cre-
16	Brain	490	18.85	25.9947	F	Cre-
16	Muscle	330	18.85	17.5066	F	Cre-
17	Heart	130	17.85	7.28291	F	Cre-
17	Liver	920	17.85	51.5406	F	Cre-
17	Panc	160	17.85	8.96359	F	Cre-
17	Spleen	50	17.85	2.80112	F	Cre-
17	Kidney	260	17.85	14.5658	F	Cre-
17	Epi	140	17.85	7.84314	F	Cre-
17	Subcu	160	17.85	8.96359	F	Cre-
17	Om	#VALUE!	17.85	#VALUE!	F	Cre-
17	Secum	230	17.85	12.8852	F	Cre-
17	Brain	460	17.85	25.7703	F	Cre-
17	Muscle	340	17.85	19.0476	F	Cre-
18	Heart	80	19.43	4.11734	F	Cre-
18	Liver	860	19.43	44.2615	F	Cre-
18	Panc	100	19.43	5.14668	F	Cre-
18	Spleen	30	19.43	1.544	F	Cre-
18	Kidney	250	19.43	12.8667	F	Cre-
18	Epi	150	19.43	7.72002	F	Cre-
18	Subcu	70	19.43	3.60268	F	Cre-
18	Om	-60	19.43	-3.08801	F	Cre-
18	Secum	310	19.43	15.9547	F	Cre-
18	Brain	430	19.43	22.1307	F	Cre-
18	Muscle	340	19.43	17.4987	F	Cre-
19	Heart	110	18.44	5.96529	F	Cre-
19	Liver	910	18.44	49.3492	F	Cre-
19	Panc	200	18.44	10.846	F	Cre-
19	Spleen	30	18.44	1.6269	F	Cre-
19	Kidney	0	18.44	0	F	Cre-
19	Epi	110	18.44	5.96529	F	Cre-
19	Subcu	140	18.44	7.59219	F	Cre-
19	Om	10	18.44	0.542299	F	Cre-
19	Secum	80	18.44	4.33839	F	Cre-
19	Brain	450	18.44	24.4035	F	Cre-
19	Muscle	420	18.44	22.7766	F	Cre-
20	Heart	120	19.56	6.13497	M	Cre+
20	Liver	1280	19.56	65.4397	M	Cre+
20	Panc	180	19.56	9.20245	M	Cre+
20	Spleen	60	19.56	3.06748	M	Cre+
20	Kidney	450	19.56	23.0061	M	Cre+
20	Epi	880	19.56	44.9898	M	Cre+
20	Subcu	420	19.56	21.4724	M	Cre+
20	Om	20	19.56	1.02249	M	Cre+
20	Secum	360	19.56	18.4049	M	Cre+
20	Brain	440	19.56	22.4949	M	Cre+
20	Muscle	280	19.56	14.3149	M	Cre+
21	Heart	130	19.56	6.64622	M	Cre+
21	Liver	1240	19.56	63.3947	M	Cre+
21	Panc	170	19.56	8.69121	M	Cre+
21	Spleen	60	19.56	3.06748	M	Cre+
21	Kidney	390	19.56	19.9387	M	Cre+
21	Epi	1250	19.56	63.9059	M	Cre+
21	Subcu	550	19.56	28.1186	M	Cre+
21	Om	-20	19.56	-1.02249	M	Cre+
21	Secum	250	19.56	12.7812	M	Cre+
21	Brain	460	19.56	23.5174	M	Cre+
21	Muscle	310	19.56	15.8487	M	Cre+
22	Heart	140	18	7.77778	M	Cre-
22	Liver	600	18	33.3333	M	Cre-
22	Panc	110	18	6.11111	M	Cre-
22	Spleen	80	18	4.44444	M	Cre-
22	Kidney	460	18	25.5556	M	Cre-
22	Epi	1270	18	70.5556	M	Cre-
22	Subcu	580	18	32.2222	M	Cre-
22	Om	30	18	1.66667	M	Cre-
22	Secum	300	18	16.6667	M	Cre-
22	Brain	460	18	25.5556	M	Cre-
22	Muscle	340	18	18.8889	M	Cre-
23	Heart	130	19.62	6.62589	F	Cre-
23	Liver	950	19.62	48.42	F	Cre-
23	Panc	150	19.62	7.64526	F	Cre-
23	Spleen	30	19.62	1.52905	F	Cre-
23	Kidney	310	19.62	15.8002	F	Cre-
23	Epi	70	19.62	3.56779	F	Cre-
23	Subcu	120	19.62	6.11621	F	Cre-
23	Om	#VALUE!	19.62	#VALUE!	F	Cre-
23	Secum	280	19.62	14.2712	F	Cre-
23	Brain	420	19.62	21.4067	F	Cre-
23	Muscle	270	19.62	13.7615	F	Cre-
24	Heart	110	19.01	5.78643	F	Cre+
24	Liver	910	19.01	47.8695	F	Cre+
24	Panc	190	19.01	9.99474	F	Cre+
24	Spleen	80	19.01	4.20831	F	Cre+
24	Kidney	260	19.01	13.677	F	Cre+
24	Epi	40	19.01	2.10416	F	Cre+
24	Subcu	20	19.01	1.05208	F	Cre+
24	Om	-20	19.01	-1.05208	F	Cre+
24	Secum	200	19.01	10.5208	F	Cre+
24	Brain	440	19.01	23.1457	F	Cre+
24	Muscle	360	19.01	18.9374	F	Cre+
25	Heart	180	18.42	9.77199	M	Cre-
25	Liver	1070	18.42	58.089	M	Cre-
25	Panc	170	18.42	9.2291	M	Cre-
25	Spleen	70	18.42	3.80022	M	Cre-
25	Kidney	480	18.42	26.0586	M	Cre-
25	Epi	990	18.42	53.7459	M	Cre-
25	Subcu	360	18.42	19.544	M	Cre-
25	Om	20	18.42	1.08578	M	Cre-
25	Secum	240	18.42	13.0293	M	Cre-
25	Brain	390	18.42	21.1726	M	Cre-
25	Muscle	320	18.42	17.3724	M	Cre-
26	Heart	120	18.36	6.53595	M	Cre+
26	Liver	920	18.36	50.1089	M	Cre+
26	Panc	270	18.36	14.7059	M	Cre+
26	Spleen	140	18.36	7.62527	M	Cre+
26	Kidney	500	18.36	27.2331	M	Cre+
26	Epi	#REF!	18.36	#REF!	M	Cre+
26	Subcu	280	18.36	15.2505	M	Cre+
26	Om	-10	18.36	-0.544662	M	Cre+
26	Secum	390	18.36	21.2418	M	Cre+
26	Brain	450	18.36	24.5098	M	Cre+
26	Muscle	410	18.36	22.3312	M	Cre+
27	Heart	160	19.63	8.15079	M	Cre+
27	Liver	670	19.63	34.1314	M	Cre+
27	Panc	440	19.63	22.4147	M	Cre+
27	Spleen	100	19.63	5.09424	M	Cre+
27	Kidney	430	19.63	21.9052	M	Cre+
27	Epi	630	19.63	32.0937	M	Cre+
27	Subcu	270	19.63	13.7545	M	Cre+
27	Om	-20	19.63	-1.01885	M	Cre+
27	Secum	250	19.63	12.7356	M	Cre+
27	Brain	420	19.63	21.3958	M	Cre+
27	Muscle	340	19.63	17.3204	M	Cre+
28	Heart	130	18.62	6.98174	M	Cre+
28	Liver	1000	18.62	53.7057	M	Cre+
28	Panc	240	18.62	12.8894	M	Cre+
28	Spleen	70	18.62	3.7594	M	Cre+
28	Kidney	350	18.62	18.797	M	Cre+
28	Epi	520	18.62	27.927	M	Cre+
28	Subcu	280	18.62	15.0376	M	Cre+
28	Om	10	18.62	0.537057	M	Cre+
28	Secum	290	18.62	15.5747	M	Cre+
28	Brain	430	18.62	23.0934	M	Cre+
28	Muscle	350	18.62	18.797	M	Cre+
29	Heart	160	17.58	9.10125	M	Cre+
29	Liver	730	17.58	41.5245	M	Cre+
29	Panc	110	17.58	6.25711	M	Cre+
29	Spleen	60	17.58	3.41297	M	Cre+
29	Kidney	430	17.58	24.4596	M	Cre+
29	Epi	810	17.58	46.0751	M	Cre+
29	Subcu	410	17.58	23.322	M	Cre+
29	Om	50	17.58	2.84414	M	Cre+
29	Secum	370	17.58	21.0466	M	Cre+
29	Brain	400	17.58	22.7531	M	Cre+
29	Muscle	330	17.58	18.7713	M	Cre+
30	Heart	130	19	6.84211	F	Cre-
30	Liver	460	19	24.2105	F	Cre-
30	Panc	30	19	1.57895	F	Cre-
30	Spleen	70	19	3.68421	F	Cre-
30	Kidney	270	19	14.2105	F	Cre-
30	Epi	40	19	2.10526	F	Cre-
30	Subcu	80	19	4.21053	F	Cre-
30	Om	-40	19	-2.10526	F	Cre-
30	Secum	120	19	6.31579	F	Cre-
30	Brain	340	19	17.8947	F	Cre-
30	Muscle	210	19	11.0526	F	Cre-
31	Heart	90	18.36	4.90196	F	Cre+
31	Liver	550	18.36	29.9564	F	Cre+
31	Panc	190	18.36	10.3486	F	Cre+
31	Spleen	100	18.36	5.44662	F	Cre+
31	Kidney	330	18.36	17.9739	F	Cre+
31	Epi	350	18.36	19.0632	F	Cre+
31	Subcu	260	18.36	14.1612	F	Cre+
31	Om	-20	18.36	-1.08932	F	Cre+
31	Secum	290	18.36	15.7952	F	Cre+
31	Brain	330	18.36	17.9739	F	Cre+
31	Muscle	350	18.36	19.0632	F	Cre+
32	Heart	90	19.09	4.71451	F	Cre+
32	Liver	570	19.09	29.8586	F	Cre+
32	Panc	150	19.09	7.85752	F	Cre+
32	Spleen	50	19.09	2.61917	F	Cre+
32	Kidney	340	19.09	17.8104	F	Cre+
32	Epi	120	19.09	6.28601	F	Cre+
32	Subcu	190	19.09	9.95285	F	Cre+
32	Om	#VALUE!	19.09	#VALUE!	F	Cre+
32	Secum	370	19.09	19.3819	F	Cre+
32	Brain	310	19.09	16.2389	F	Cre+
32	Muscle	340	19.09	17.8104	F	Cre+
33	Heart	100	18.74	5.33618	F	Cre-
33	Liver	430	18.74	22.9456	F	Cre-
33	Panc	100	18.74	5.33618	F	Cre-
33	Spleen	150	18.74	8.00427	F	Cre-
33	Kidney	270	18.74	14.4077	F	Cre-
33	Epi	30	18.74	1.60085	F	Cre-
33	Subcu	30	18.74	1.60085	F	Cre-
33	Om	-40	18.74	-2.13447	F	Cre-
33	Secum	200	18.74	10.6724	F	Cre-
33	Brain	410	18.74	21.8783	F	Cre-
33	Muscle	350	18.74	18.6766	F	Cre-
34	Heart	110	17.73	6.20417	F	Cre+
34	Liver	640	17.73	36.097	F	Cre+
34	Panc	200	17.73	11.2803	F	Cre+
34	Spleen	80	17.73	4.51213	F	Cre+
34	Kidney	100	17.73	5.64016	F	Cre+
34	Epi	150	17.73	8.46024	F	Cre+
34	Subcu	250	17.73	14.1004	F	Cre+
34	Om	-40	17.73	-2.25606	F	Cre+
34	Secum	220	17.73	12.4083	F	Cre+
34	Brain	380	17.73	21.4326	F	Cre+
34	Muscle	390	17.73	21.9966	F	Cre+
35	Heart	160	19.33	8.27729	M	Cre-
35	Liver	2520	19.33	130.367	M	Cre-
35	Panc	80	19.33	4.13864	M	Cre-
35	Spleen	90	19.33	4.65598	M	Cre-
35	Kidney	480	19.33	24.8319	M	Cre-
35	Epi	1200	19.33	62.0797	M	Cre-
35	Subcu	780	19.33	40.3518	M	Cre-
35	Om	30	19.33	1.55199	M	Cre-
35	Secum	220	19.33	11.3813	M	Cre-
35	Brain	450	19.33	23.2799	M	Cre-
35	Muscle	400	19.33	20.6932	M	Cre-
36	Heart	150	18.95	7.91557	M	Cre-
36	Liver	2350	18.95	124.011	M	Cre-
36	Panc	190	18.95	10.0264	M	Cre-
36	Spleen	60	18.95	3.16623	M	Cre-
36	Kidney	510	18.95	26.9129	M	Cre-
36	Epi	1640	18.95	86.5435	M	Cre-
36	Subcu	890	18.95	46.9657	M	Cre-
36	Om	10	18.95	0.527704	M	Cre-
36	Secum	460	18.95	24.2744	M	Cre-
36	Brain	440	18.95	23.219	M	Cre-
36	Muscle	340	18.95	17.942	M	Cre-
37	Heart	110	18.78	5.85729	F	Cre+
37	Liver	420	18.78	22.3642	F	Cre+
37	Panc	140	18.78	7.45474	F	Cre+
37	Spleen	50	18.78	2.66241	F	Cre+
37	Kidney	190	18.78	10.1171	F	Cre+
37	Epi	-10	18.78	-0.532481	F	Cre+
37	Subcu	40	18.78	2.12993	F	Cre+
37	Om	-50	18.78	-2.66241	F	Cre+
37	Secum	360	18.78	19.1693	F	Cre+
37	Brain	490	18.78	26.0916	F	Cre+
37	Muscle	330	18.78	17.5719	F	Cre+
38	Heart	130	19.42	6.69413	F	Cre+
38	Liver	490	19.42	25.2317	F	Cre+
38	Panc	160	19.42	8.23893	F	Cre+
38	Spleen	60	19.42	3.0896	F	Cre+
38	Kidney	290	19.42	14.9331	F	Cre+
38	Epi	110	19.42	5.66426	F	Cre+
38	Subcu	100	19.42	5.14933	F	Cre+
38	Om	20	19.42	1.02987	F	Cre+
38	Secum	230	19.42	11.8435	F	Cre+
38	Brain	520	19.42	26.7765	F	Cre+
38	Muscle	350	19.42	18.0227	F	Cre+
39	Heart	60	19.03	3.15292	F	Cre+
39	Liver	680	19.03	35.7331	F	Cre+
39	Panc	170	19.03	8.93326	F	Cre+
39	Spleen	40	19.03	2.10194	F	Cre+
39	Kidney	280	19.03	14.7136	F	Cre+
39	Epi	190	19.03	9.98424	F	Cre+
39	Subcu	#VALUE!	19.03	#VALUE!	F	Cre+
39	Om	-30	19.03	-1.57646	F	Cre+
39	Secum	290	19.03	15.2391	F	Cre+
39	Brain	390	19.03	20.494	F	Cre+
39	Muscle	410	19.03	21.5449	F	Cre+
40	Heart	100	18.85	5.30504	F	Cre+
40	Liver	400	18.85	21.2202	F	Cre+
40	Panc	160	18.85	8.48806	F	Cre+
40	Spleen	60	18.85	3.18302	F	Cre+
40	Kidney	480	18.85	25.4642	F	Cre+
40	Epi	110	18.85	5.83554	F	Cre+
40	Subcu	90	18.85	4.77454	F	Cre+
40	Om	0	18.85	0	F	Cre+
40	Secum	260	18.85	13.7931	F	Cre+
40	Brain	360	18.85	19.0981	F	Cre+
40	Muscle	340	18.85	18.0371	F	Cre+
41	Heart	130	18.7	6.95187	F	Cre+
41	Liver	580	18.7	31.016	F	Cre+
41	Panc	190	18.7	10.1604	F	Cre+
41	Spleen	80	18.7	4.27807	F	Cre+
41	Kidney	230	18.7	12.2995	F	Cre+
41	Epi	130	18.7	6.95187	F	Cre+
41	Subcu	90	18.7	4.81283	F	Cre+
41	Om	-40	18.7	-2.13904	F	Cre+
41	Secum	180	18.7	9.62567	F	Cre+
41	Brain	340	18.7	18.1818	F	Cre+
41	Muscle	360	18.7	19.2513	F	Cre+
42	Heart	110	18.97	5.79863	F	Cre+
42	Liver	820	18.97	43.2261	F	Cre+
42	Panc	140	18.97	7.38007	F	Cre+
42	Spleen	10	18.97	0.527148	F	Cre+
42	Kidney	240	18.97	12.6516	F	Cre+
42	Epi	190	18.97	10.0158	F	Cre+
42	Subcu	210	18.97	11.0701	F	Cre+
42	Om	20	18.97	1.0543	F	Cre+
42	Secum	330	18.97	17.3959	F	Cre+
42	Brain	510	18.97	26.8846	F	Cre+
42	Muscle	400	18.97	21.0859	F	Cre+
43	Heart	130	19.36	6.71488	F	Cre+
43	Liver	640	19.36	33.0579	F	Cre+
43	Panc	50	19.36	2.58264	F	Cre+
43	Spleen	40	19.36	2.06612	F	Cre+
43	Kidney	240	19.36	12.3967	F	Cre+
43	Epi	40	19.36	2.06612	F	Cre+
43	Subcu	50	19.36	2.58264	F	Cre+
43	Om	-10	19.36	-0.516529	F	Cre+
43	Secum	260	19.36	13.4298	F	Cre+
43	Brain	430	19.36	22.2107	F	Cre+
43	Muscle	440	19.36	22.7273	F	Cre+
44	Heart	150	19.75	7.59494	F	Cre-
44	Liver	-1099	19.75	-55.6456	F	Cre-
44	Panc	130	19.75	6.58228	F	Cre-
44	Spleen	80	19.75	4.05063	F	Cre-
44	Kidney	270	19.75	13.6709	F	Cre-
44	Epi	180	19.75	9.11392	F	Cre-
44	Subcu	150	19.75	7.59494	F	Cre-
44	Om	-30	19.75	-1.51899	F	Cre-
44	Secum	350	19.75	17.7215	F	Cre-
44	Brain	470	19.75	23.7975	F	Cre-
44	Muscle	390	19.75	19.7468	F	Cre-
45	Heart	110	18.58	5.92034	F	Cre+
45	Liver	730	18.58	39.2896	F	Cre+
45	Panc	120	18.58	6.45856	F	Cre+
45	Spleen	60	18.58	3.22928	F	Cre+
45	Kidney	210	18.58	11.3025	F	Cre+
45	Epi	170	18.58	9.14962	F	Cre+
45	Subcu	130	18.58	6.99677	F	Cre+
45	Om	-30	18.58	-1.61464	F	Cre+
45	Secum	230	18.58	12.3789	F	Cre+
45	Brain	440	18.58	23.6814	F	Cre+
45	Muscle	310	18.58	16.6846	F	Cre+
46	Heart	200	18.51	10.805	M	Cre-
46	Liver	930	18.51	50.2431	M	Cre-
46	Panc	210	18.51	11.3452	M	Cre-
46	Spleen	120	18.51	6.48298	M	Cre-
46	Kidney	430	18.51	23.2307	M	Cre-
46	Epi	850	18.51	45.9211	M	Cre-
46	Subcu	340	18.51	18.3684	M	Cre-
46	Om	-10	18.51	-0.540249	M	Cre-
46	Secum	210	18.51	11.3452	M	Cre-
46	Brain	470	18.51	25.3917	M	Cre-
46	Muscle	390	18.51	21.0697	M	Cre-
47	Heart	180	19.47	9.24499	M	Cre+
47	Liver	1010	19.47	51.8747	M	Cre+
47	Panc	250	19.47	12.8403	M	Cre+
47	Spleen	150	19.47	7.70416	M	Cre+
47	Kidney	550	19.47	28.2486	M	Cre+
47	Epi	880	19.47	45.1977	M	Cre+
47	Subcu	180	19.47	9.24499	M	Cre+
47	Om	-10	19.47	-0.513611	M	Cre+
47	Secum	320	19.47	16.4355	M	Cre+
47	Brain	500	19.47	25.6805	M	Cre+
47	Muscle	420	19.47	21.5716	M	Cre+
48	Heart	150	17.74	8.45547	M	Cre-
48	Liver	1100	17.74	62.0068	M	Cre-
48	Panc	190	17.74	10.7103	M	Cre-
48	Spleen	50	17.74	2.81849	M	Cre-
48	Kidney	500	17.74	28.1849	M	Cre-
48	Epi	1170	17.74	65.9526	M	Cre-
48	Subcu	530	17.74	29.876	M	Cre-
48	Om	50	17.74	2.81849	M	Cre-
48	Secum	470	17.74	26.4938	M	Cre-
48	Brain	450	17.74	25.3664	M	Cre-
48	Muscle	390	17.74	21.9842	M	Cre-
49	Heart	140	19.17	7.30308	M	Cre-
49	Liver	1340	19.17	69.9009	M	Cre-
49	Panc	150	19.17	7.82473	M	Cre-
49	Spleen	80	19.17	4.17319	M	Cre-
49	Kidney	510	19.17	26.6041	M	Cre-
49	Epi	1580	19.17	82.4204	M	Cre-
49	Subcu	590	19.17	30.7773	M	Cre-
49	Om	#VALUE!	19.17	#VALUE!	M	Cre-
49	Secum	380	19.17	19.8226	M	Cre-
49	Brain	430	19.17	22.4309	M	Cre-
49	Muscle	330	19.17	17.2144	M	Cre-
50	Heart	210	18.18	11.5512	M	Cre+
50	Liver	1150	18.18	63.2563	M	Cre+
50	Panc	160	18.18	8.80088	M	Cre+
50	Spleen	80	18.18	4.40044	M	Cre+
50	Kidney	440	18.18	24.2024	M	Cre+
50	Epi	1350	18.18	74.2574	M	Cre+
50	Subcu	530	18.18	29.1529	M	Cre+
50	Om	40	18.18	2.20022	M	Cre+
50	Secum	330	18.18	18.1518	M	Cre+
50	Brain	470	18.18	25.8526	M	Cre+
50	Muscle	330	18.18	18.1518	M	Cre+
51	Heart	120	20.32	5.90551	M	Cre-
51	Liver	1730	20.32	85.1378	M	Cre-
51	Panc	160	20.32	7.87402	M	Cre-
51	Spleen	70	20.32	3.44488	M	Cre-
51	Kidney	450	20.32	22.1457	M	Cre-
51	Epi	1370	20.32	67.4213	M	Cre-
51	Subcu	700	20.32	34.4488	M	Cre-
51	Om	60	20.32	2.95276	M	Cre-
51	Secum	330	20.32	16.2402	M	Cre-
51	Brain	470	20.32	23.1299	M	Cre-
51	Muscle	400	20.32	19.685	M	Cre-
52	Heart	150	20.96	7.15649	M	Cre-
52	Liver	1510	20.96	72.042	M	Cre-
52	Panc	250	20.96	11.9275	M	Cre-
52	Spleen	50	20.96	2.3855	M	Cre-
52	Kidney	430	20.96	20.5153	M	Cre-
52	Epi	1010	20.96	48.187	M	Cre-
52	Subcu	550	20.96	26.2405	M	Cre-
52	Om	0	20.96	0	M	Cre-
52	Secum	350	20.96	16.6985	M	Cre-
52	Brain	480	20.96	22.9008	M	Cre-
52	Muscle	490	20.96	23.3779	M	Cre-
53	Heart	170	18.68	9.10064	M	Cre-
53	Liver	950	18.68	50.8565	M	Cre-
53	Panc	230	18.68	12.3126	M	Cre-
53	Spleen	60	18.68	3.21199	M	Cre-
53	Kidney	#VALUE!	18.68	#VALUE!	M	Cre-
53	Epi	590	18.68	31.5846	M	Cre-
53	Subcu	340	18.68	18.2013	M	Cre-
53	Om	30	18.68	1.606	M	Cre-
53	Secum	370	18.68	19.8073	M	Cre-
53	Brain	420	18.68	22.4839	M	Cre-
53	Muscle	350	18.68	18.7366	M	Cre-
54	Heart	200	18.71	10.6895	M	Cre-
54	Liver	1830	18.71	97.8087	M	Cre-
54	Panc	190	18.71	10.155	M	Cre-
54	Spleen	60	18.71	3.20684	M	Cre-
54	Kidney	530	18.71	28.3271	M	Cre-
54	Epi	1370	18.71	73.2229	M	Cre-
54	Subcu	570	18.71	30.465	M	Cre-
54	Om	30	18.71	1.60342	M	Cre-
54	Secum	160	18.71	8.55158	M	Cre-
54	Brain	490	18.71	26.1892	M	Cre-
54	Muscle	340	18.71	18.1721	M	Cre-
55	Heart	110	18.95	5.80475	M	Cre-
55	Liver	1520	18.95	80.2111	M	Cre-
55	Panc	220	18.95	11.6095	M	Cre-
55	Spleen	60	18.95	3.16623	M	Cre-
55	Kidney	430	18.95	22.6913	M	Cre-
55	Epi	1140	18.95	60.1583	M	Cre-
55	Subcu	640	18.95	33.7731	M	Cre-
55	Om	0	18.95	0	M	Cre-
55	Secum	400	18.95	21.1082	M	Cre-
55	Brain	470	18.95	24.8021	M	Cre-
55	Muscle	400	18.95	21.1082	M	Cre-
56	Heart	90	18.54	4.85437	M	Cre+
56	Liver	650	18.54	35.0593	M	Cre+
56	Panc	160	18.54	8.62999	M	Cre+
56	Spleen	80	18.54	4.31499	M	Cre+
56	Kidney	490	18.54	26.4293	M	Cre+
56	Epi	440	18.54	23.7325	M	Cre+
56	Subcu	240	18.54	12.945	M	Cre+
56	Om	#VALUE!	18.54	#VALUE!	M	Cre+
56	Secum	380	18.54	20.4962	M	Cre+
56	Brain	480	18.54	25.89	M	Cre+
56	Muscle	950	18.54	51.2406	M	Cre+
57	Heart	110	18.29	6.01422	F	Cre+
57	Liver	850	18.29	46.4735	F	Cre+
57	Panc	170	18.29	9.2947	F	Cre+
57	Spleen	80	18.29	4.37397	F	Cre+
57	Kidney	330	18.29	18.0426	F	Cre+
57	Epi	40	18.29	2.18699	F	Cre+
57	Subcu	60	18.29	3.28048	F	Cre+
57	Om	-10	18.29	-0.546747	F	Cre+
57	Secum	290	18.29	15.8557	F	Cre+
57	Brain	490	18.29	26.7906	F	Cre+
57	Muscle	370	18.29	20.2296	F	Cre+
58	Heart	110	18.07	6.08744	F	Cre+
58	Liver	700	18.07	38.7382	F	Cre+
58	Panc	140	18.07	7.74765	F	Cre+
58	Spleen	60	18.07	3.32042	F	Cre+
58	Kidney	440	18.07	24.3498	F	Cre+
58	Epi	120	18.07	6.64084	F	Cre+
58	Subcu	100	18.07	5.53403	F	Cre+
58	Om	540	18.07	29.8838	F	Cre+
58	Secum	30	18.07	1.66021	F	Cre+
58	Brain	470	18.07	26.01	F	Cre+
58	Muscle	220	18.07	12.1749	F	Cre+

## Sheet: Metabolic_cage_Raw_data
mark	gender	condition	INTERVAL	CHAN	Minutes	Cycle	DATE/TIME	VO2	O2IN	O2OUT	DO2	ACCO2	VCO2	CO2IN	CO2OUT	DCO2	ACCCO2	RER	HEAT	FLOW	XTOT	XAMB	YTOT	YAMB
123RC	F	Cre-	108	103	1764	Dark	43751	3539	21.163	21.01	0.153	1.7	3029.85	0.043	0.272	0.229	2.4	0.856132	0.2	0.5	667	318	590	178
123RC	F	Cre-	280	103	4860	Dark	43753.2	3478.73	21.163	21.032	0.13	4.2	3002.63	0.047	0.241	0.193	6.3	0.86314	0.2	0.5	58	14	95	12
123RC	F	Cre-	243	103	4194	Light	43752.7	3417.78	21.163	20.94	0.223	3.6	2924.03	0.041	0.365	0.324	5.4	0.855534	0.3	0.5	3021	2060	2459	1328
123RC	F	Cre-	161	103	2718	Light	43751.7	3396.62	21.163	20.956	0.207	2.5	2782.29	0.04	0.316	0.275	3.6	0.819133	0.3	0.5	2135	1370	1670	835
123RC	F	Cre-	152	103	2556	Light	43751.6	3395.17	21.163	21.06	0.103	2.4	2684.52	0.041	0.229	0.189	3.4	0.790688	0.2	0.5	16	4	32	3
123RC	F	Cre-	157	103	2646	Light	43751.6	3378.45	21.163	21.043	0.12	2.4	3015.95	0.04	0.238	0.198	3.5	0.892704	0.2	0.5	52	12	32	9
123RC	F	Cre-	208	103	3564	Dark	43752.3	3314.39	21.163	21.026	0.137	3.2	2799.43	0.045	0.247	0.202	4.6	0.844627	0.2	0.5	95	33	82	23
123RC	F	Cre-	232	103	3996	Light	43752.6	3307.44	21.163	21.027	0.136	3.5	2932.02	0.04	0.26	0.22	5.2	0.886494	0.2	0.5	124	39	125	38
123RC	F	Cre-	10	103	0	Dark	43749.8	3297.37	21.163	20.935	0.228	0.2	2852.34	0.039	0.308	0.268	0.2	0.865033	0.3	0.5	5533	4307	3414	2132
123RC	F	Cre-	27	103	306	Dark	43750	3296.18	21.163	20.966	0.197	0.5	2629.38	0.045	0.295	0.25	0.6	0.797706	0.3	0.5	613	216	694	158
123RC	F	Cre-	284	103	4932	Dark	43753.2	3295.2	21.163	21.01	0.152	4.3	2797.29	0.047	0.292	0.244	6.4	0.8489	0.2	0.5	640	263	467	171
123RC	F	Cre-	298	103	5184	Light	43753.4	3284.31	21.162	21.049	0.114	4.5	2554.7	0.048	0.239	0.19	6.7	0.777849	0.2	0.5	46	6	30	8
123RC	F	Cre-	130	103	2160	Light	43751.3	3268.16	21.163	20.926	0.237	2.1	2770.1	0.041	0.326	0.285	2.9	0.847602	0.4	0.5	3811	2968	2674	1708
123RC	F	Cre-	95	103	1530	Dark	43750.9	3266.38	21.163	20.932	0.231	1.6	2627.22	0.041	0.34	0.299	2.1	0.804322	0.4	0.5	2780	2145	2090	1265
123RC	F	Cre-	63	103	954	Light	43750.5	3249.75	21.163	20.97	0.193	1.2	2604.66	0.042	0.279	0.237	1.5	0.801494	0.3	0.5	3651	2814	2388	1490
123RC	F	Cre-	178	103	3024	Dark	43751.9	3225.69	21.163	20.946	0.217	2.7	2561.09	0.042	0.351	0.309	3.9	0.793964	0.3	0.5	2316	1545	1810	955
123RC	F	Cre-	301	103	5238	Light	43753.4	3220.91	21.163	21.064	0.099	4.5	2735.97	0.044	0.249	0.204	6.8	0.849438	0.2	0.5	35	6	273	5
123RC	F	Cre-	3	103	NA	NA	43749.7	3215.59	21.163	20.933	0.23	0	2782.43	0.039	0.314	0.276	0	0.865292	0.4	0.5	4307	2955	2870	1586
123RC	F	Cre-	119	103	1962	Dark	43751.2	3214.89	21.163	20.924	0.24	1.9	2840.8	0.042	0.327	0.285	2.7	0.883638	0.4	0.5	4609	3521	3207	1891
123RC	F	Cre-	299	103	5202	Light	43753.4	3211.76	21.163	21.064	0.099	4.5	2456.28	0.047	0.226	0.178	6.8	0.764776	0.2	0.5	15	6	45	6
123RC	F	Cre-	79	103	1242	Light	43750.7	3211.29	21.163	20.962	0.202	1.4	2700.64	0.039	0.3	0.261	1.8	0.840985	0.3	0.5	3444	2577	2451	1405
123RC	F	Cre-	35	103	450	Dark	43750.1	3186.13	21.163	20.925	0.238	0.6	2534.22	0.045	0.319	0.274	0.8	0.795391	0.4	0.5	7395	6055	4592	3013
123RC	F	Cre-	137	103	2286	Light	43751.4	3176.86	21.163	21.056	0.107	2.2	2814.7	0.041	0.242	0.201	3.1	0.886001	0.2	0.5	63	12	101	22
123RC	F	Cre-	129	103	2142	Dark	43751.3	3171.44	21.163	20.918	0.245	2.1	2441.39	0.041	0.349	0.308	2.9	0.769805	0.4	0.5	2807	2021	2076	1232
123RC	F	Cre-	162	103	2736	Light	43751.7	3167.79	21.163	21.004	0.16	2.5	2412.88	0.04	0.27	0.23	3.6	0.761694	0.2	0.5	2123	1542	1471	795
123RC	F	Cre-	266	103	4608	Dark	43753	3157.82	21.163	20.908	0.255	3.9	2664.01	0.045	0.366	0.321	6	0.843624	0.4	0.5	2826	1840	2232	1318
123RC	F	Cre-	218	103	3744	Light	43752.4	3154.54	21.163	21.015	0.148	3.3	2686.13	0.047	0.279	0.233	4.9	0.851514	0.2	0.5	235	67	132	29
123RC	F	Cre-	100	103	1620	Dark	43750.9	3147.47	21.163	21.015	0.148	1.6	2765.28	0.043	0.26	0.217	2.2	0.878573	0.2	0.5	209	94	247	75
123RC	F	Cre-	158	103	2664	Light	43751.6	3135.07	21.163	20.942	0.221	2.5	2456.32	0.04	0.324	0.284	3.5	0.783498	0.3	0.5	1613	1040	1192	586
123RC	F	Cre-	140	103	2340	Light	43751.4	3132.82	21.163	21.064	0.099	2.3	2791.25	0.041	0.231	0.19	3.1	0.890972	0.2	0.5	24	10	22	7
123RC	F	Cre-	39	103	522	Dark	43750.2	3132.23	21.163	20.899	0.264	0.7	2777.77	0.045	0.348	0.303	0.9	0.886835	0.4	0.5	5794	4524	3927	2494
123RC	F	Cre-	176	103	2988	Dark	43751.9	3131.62	21.163	20.961	0.202	2.7	2424.09	0.042	0.346	0.305	3.9	0.774069	0.3	0.5	1186	616	1017	411
123RC	F	Cre-	186	103	3168	Dark	43752	3128.89	21.163	20.953	0.21	2.9	2550.99	0.043	0.324	0.281	4.1	0.815303	0.3	0.5	2807	1999	2218	1254
123RC	F	Cre-	206	103	3528	Dark	43752.2	3127.58	21.163	21.028	0.135	3.2	2393.84	0.043	0.261	0.218	4.6	0.765397	0.2	0.5	64	23	104	33
123RC	F	Cre-	122	103	2016	Dark	43751.2	3125.03	21.163	20.937	0.226	2	2389.63	0.042	0.33	0.289	2.8	0.764676	0.3	0.5	2460	1726	1999	1010
123RC	F	Cre-	191	103	3258	Dark	43752.1	3119.69	21.163	21.054	0.109	2.9	2377.19	0.044	0.215	0.171	4.2	0.761996	0.2	0.5	12	0	24	4
123RC	F	Cre-	231	103	3978	Light	43752.6	3119.62	21.163	21.062	0.101	3.5	2550.94	0.04	0.219	0.179	5.2	0.817709	0.2	0.5	16	6	14	2
123RC	F	Cre-	1	103	NA	NA	43749.7	3118.2	21.163	20.928	0.235	0	2523.02	0.044	0.318	0.274	0	0.809126	0.4	0.5	1134	717	829	436
123RC	F	Cre-	183	103	3114	Dark	43752	3117.23	21.163	20.952	0.212	2.8	2734.24	0.042	0.339	0.297	4.1	0.877139	0.3	0.5	2311	1364	1686	829
123RC	F	Cre-	190	103	3240	Dark	43752	3111.44	21.163	21.047	0.116	2.9	2500.31	0.044	0.223	0.179	4.2	0.803586	0.2	0.5	26	5	42	5
123RC	F	Cre-	68	103	1044	Light	43750.5	3110.62	21.163	20.96	0.203	1.2	2308.32	0.04	0.31	0.269	1.6	0.742077	0.3	0.5	1556	927	1106	472
123RC	F	Cre-	96	103	1548	Dark	43750.9	3109.81	21.163	20.928	0.235	1.6	2557.53	0.041	0.346	0.305	2.1	0.822407	0.4	0.5	3238	2384	2250	1207
123RC	F	Cre-	40	103	540	Dark	43750.2	3109.46	21.163	20.884	0.279	0.7	2456.88	0.045	0.367	0.321	0.9	0.790132	0.4	0.5	5941	4787	4000	2602
123RC	F	Cre-	29	103	342	Dark	43750	3107.68	21.163	21.028	0.134	0.5	2581.21	0.045	0.241	0.196	0.7	0.83059	0.2	0.5	216	92	192	42
123RC	F	Cre-	240	103	4140	Light	43752.7	3107.19	21.163	21.092	0.071	3.6	2411.45	0.04	0.199	0.16	5.3	0.776087	0.1	0.5	5	2	24	5
123RC	F	Cre-	28	103	324	Dark	43750	3100.96	21.163	21.034	0.129	0.5	2444.81	0.045	0.226	0.182	0.7	0.788404	0.2	0.5	12	6	120	9
123RC	F	Cre-	194	103	3312	Dark	43752.1	3095.66	21.163	21.004	0.159	2.9	2536.72	0.045	0.261	0.216	4.3	0.819443	0.2	0.5	130	57	129	48
123RC	F	Cre-	193	103	3294	Dark	43752.1	3088.08	21.163	21.056	0.106	2.9	2767.2	0.045	0.211	0.167	4.3	0.896089	0.2	0.5	6	0	22	8
123RC	F	Cre-	126	103	2088	Dark	43751.2	3087.34	21.163	20.998	0.165	2.1	2582.41	0.041	0.255	0.213	2.8	0.836452	0.3	0.5	575	73	313	65
123RC	F	Cre-	110	103	1800	Dark	43751	3085.47	21.163	20.914	0.249	1.8	2472.38	0.042	0.37	0.328	2.4	0.801296	0.4	0.5	2588	1696	1974	1030
123RC	F	Cre-	246	103	4248	Light	43752.7	3080.91	21.163	21.047	0.116	3.6	2614.93	0.041	0.246	0.204	5.5	0.848754	0.2	0.5	376	41	227	34
123RC	F	Cre-	192	103	3276	Dark	43752.1	3080.46	21.163	21.061	0.102	2.9	2376.58	0.044	0.208	0.164	4.3	0.771502	0.2	0.5	7	0	20	4
123RC	F	Cre-	138	103	2304	Light	43751.4	3078.79	21.163	21.031	0.132	2.2	2392.23	0.041	0.262	0.221	3.1	0.777005	0.2	0.5	126	74	120	55
123RC	F	Cre-	224	103	3852	Light	43752.5	3074.68	21.163	20.975	0.187	3.4	2504.04	0.045	0.318	0.273	5	0.814407	0.3	0.5	440	97	493	87
123RC	F	Cre-	17	103	126	Dark	43749.9	3073.14	21.163	20.93	0.233	0.3	2353.8	0.043	0.325	0.282	0.4	0.765926	0.4	0.5	6474	5221	3932	2553
123RC	F	Cre-	66	103	1008	Light	43750.5	3072	21.163	21.042	0.121	1.2	2762.08	0.041	0.213	0.173	1.5	0.899115	0.2	0.5	22	7	34	5
123RC	F	Cre-	50	103	720	Light	43750.3	3070.12	21.163	20.998	0.165	1	2681.76	0.045	0.264	0.219	1.2	0.873504	0.3	0.5	998	440	847	251
123RC	F	Cre-	279	103	4842	Dark	43753.2	3068.99	21.163	21.009	0.153	4.2	2759.2	0.047	0.26	0.213	6.3	0.899055	0.2	0.5	56	22	127	21
123RC	F	Cre-	131	103	2178	Light	43751.3	3068.14	21.163	20.925	0.238	2.2	2577.29	0.041	0.319	0.278	2.9	0.840019	0.4	0.5	3208	2295	2343	1402
123RC	F	Cre-	225	103	3870	Light	43752.5	3056.63	21.163	21.042	0.121	3.4	2646.14	0.042	0.244	0.203	5.1	0.865704	0.2	0.5	106	17	37	18
123RC	F	Cre-	74	103	1152	Light	43750.6	3055.63	21.163	21.018	0.145	1.3	2656.51	0.04	0.221	0.182	1.7	0.869383	0.2	0.5	99	43	69	16
123RC	F	Cre-	276	103	4788	Dark	43753.1	3049.34	21.163	20.948	0.215	4.1	2646.08	0.046	0.319	0.273	6.2	0.867755	0.3	0.5	2399	1492	2082	1084
123RC	F	Cre-	260	103	4500	Dark	43752.9	3048.79	21.163	20.924	0.239	3.8	2450.76	0.045	0.361	0.316	5.8	0.803848	0.4	0.5	3234	2218	2559	1486
123RC	F	Cre-	185	103	3150	Dark	43752	3047.97	21.163	20.985	0.178	2.8	2652.88	0.042	0.301	0.259	4.1	0.870377	0.3	0.5	1987	1398	1547	809
123RC	F	Cre-	43	103	594	Dark	43750.2	3036.61	21.163	20.907	0.256	0.8	2586.45	0.047	0.326	0.279	1	0.851755	0.4	0.5	7009	5732	4529	3022
123RC	F	Cre-	237	103	4086	Light	43752.6	3034.39	21.163	21.001	0.163	3.5	2383.65	0.04	0.305	0.265	5.3	0.785545	0.3	0.5	422	138	409	103
123RC	F	Cre-	215	103	3690	Light	43752.4	3032.1	21.163	21.027	0.136	3.3	2403.99	0.048	0.244	0.196	4.8	0.792844	0.2	0.5	37	8	47	12
123RC	F	Cre-	65	103	990	Light	43750.5	3026.78	21.163	21.032	0.131	1.2	2644.08	0.041	0.222	0.181	1.5	0.873562	0.2	0.5	131	64	104	32
123RC	F	Cre-	159	103	2682	Light	43751.7	3025.38	21.163	20.927	0.236	2.5	2588.65	0.04	0.344	0.303	3.5	0.855643	0.4	0.5	2090	1460	1507	861
123RC	F	Cre-	114	103	1872	Dark	43751.1	3019.9	21.163	20.923	0.24	1.8	2466.45	0.042	0.343	0.301	2.5	0.816734	0.4	0.5	4740	3487	3204	1897
123RC	F	Cre-	148	103	2484	Light	43751.5	3017.5	21.163	21.036	0.128	2.4	2607.4	0.041	0.232	0.191	3.3	0.864092	0.2	0.5	833	142	615	143
123RC	F	Cre-	213	103	3654	Light	43752.3	3017.04	21.163	20.946	0.217	3.3	2305.76	0.047	0.333	0.286	4.8	0.764245	0.3	0.5	3386	2604	2613	1637
123RC	F	Cre-	235	103	4050	Light	43752.6	3014.35	21.163	21.068	0.096	3.5	2473.95	0.04	0.238	0.198	5.2	0.820723	0.2	0.5	70	9	22	9
123RC	F	Cre-	273	103	4734	Dark	43753.1	3010.59	21.163	20.909	0.253	4.1	2419.06	0.045	0.371	0.326	6.2	0.803518	0.4	0.5	2707	1885	2365	1282
123RC	F	Cre-	205	103	3510	Dark	43752.2	3006.23	21.163	20.935	0.228	3.1	2454.06	0.043	0.353	0.309	4.6	0.816324	0.4	0.5	521	126	729	123
123RC	F	Cre-	170	103	2880	Dark	43751.8	3005.52	21.163	21.065	0.098	2.6	2347.51	0.04	0.206	0.166	3.8	0.781066	0.2	0.5	26	8	9	3
123RC	F	Cre-	197	103	3366	Dark	43752.1	3002.12	21.163	20.922	0.24	3	2299.68	0.045	0.352	0.307	4.4	0.766019	0.4	0.5	4835	3643	3443	2196
123RC	F	Cre-	222	103	3816	Light	43752.4	2995.74	21.163	20.924	0.238	3.4	2570.23	0.047	0.369	0.322	5	0.857961	0.4	0.5	2475	1677	1917	1070
123RC	F	Cre-	91	103	1458	Dark	43750.8	2995.34	21.163	20.909	0.254	1.5	2455.11	0.041	0.369	0.328	2	0.819645	0.4	0.5	3961	2825	2664	1551
123RC	F	Cre-	135	103	2250	Light	43751.4	2992.36	21.163	21.033	0.13	2.2	2242.77	0.046	0.238	0.193	3	0.749497	0.2	0.5	71	14	48	8
123RC	F	Cre-	53	103	774	Light	43750.3	2990.56	21.163	21.029	0.134	1	2396.76	0.045	0.235	0.19	1.3	0.801442	0.2	0.5	48	13	128	9
123RC	F	Cre-	221	103	3798	Light	43752.4	2986.3	21.163	20.953	0.21	3.4	2612.96	0.046	0.351	0.305	5	0.874983	0.3	0.5	500	205	373	130
123RC	F	Cre-	121	103	1998	Dark	43751.2	2985.92	21.163	20.939	0.224	2	2693.67	0.041	0.301	0.26	2.7	0.902124	0.3	0.5	3260	2503	2306	1407
123RC	F	Cre-	57	103	846	Light	43750.4	2985.05	21.163	21.049	0.114	1	2396.01	0.044	0.214	0.17	1.3	0.80267	0.2	0.5	41	8	38	8
123RC	F	Cre-	262	103	4536	Dark	43752.9	2984.9	21.163	20.919	0.244	3.8	2472.53	0.044	0.361	0.316	5.8	0.828348	0.4	0.5	3117	2090	2484	1435
123RC	F	Cre-	274	103	4752	Dark	43753.1	2982.79	21.163	20.921	0.242	4.1	2409.24	0.046	0.352	0.306	6.2	0.807712	0.4	0.5	3595	2599	2975	1844
123RC	F	Cre-	113	103	1854	Dark	43751.1	2979.57	21.163	20.91	0.253	1.8	2465.21	0.042	0.361	0.319	2.5	0.827369	0.4	0.5	4672	3656	3105	1864
123RC	F	Cre-	32	103	396	Dark	43750.1	2977.47	21.163	20.904	0.258	0.6	2304.44	0.045	0.364	0.319	0.7	0.773958	0.4	0.5	1779	955	1354	578
123RC	F	Cre-	217	103	3726	Light	43752.4	2975.67	21.163	21.048	0.115	3.3	2343.68	0.047	0.243	0.195	4.9	0.787616	0.2	0.5	64	5	72	8
123RC	F	Cre-	250	103	4320	Dark	43752.8	2969.85	21.163	21.038	0.125	3.7	2683.72	0.041	0.261	0.22	5.6	0.903656	0.2	0.5	65	12	95	15
123RC	F	Cre-	261	103	4518	Dark	43752.9	2968.96	21.163	20.917	0.246	3.8	2612.57	0.045	0.369	0.324	5.8	0.879962	0.4	0.5	4088	3116	3282	2103
123RC	F	Cre-	294	103	5112	Light	43753.3	2967.62	21.162	21.041	0.121	4.4	2365.85	0.051	0.242	0.192	6.7	0.79722	0.2	0.5	13	0	12	0
123RC	F	Cre-	139	103	2322	Light	43751.4	2964.83	21.163	21.005	0.158	2.3	2622.07	0.041	0.298	0.257	3.1	0.884392	0.2	0.5	240	51	445	62
123RC	F	Cre-	160	103	2700	Light	43751.7	2962.82	21.163	20.94	0.223	2.5	2681.94	0.04	0.336	0.295	3.5	0.905197	0.3	0.5	2731	1902	2191	1247
123RC	F	Cre-	202	103	3456	Dark	43752.2	2962.48	21.163	20.919	0.244	3.1	2274.85	0.045	0.357	0.312	4.5	0.767887	0.4	0.5	3775	2866	2807	1728
123RC	F	Cre-	275	103	4770	Dark	43753.1	2951.79	21.163	20.962	0.201	4.1	2205.06	0.047	0.323	0.277	6.2	0.747025	0.3	0.5	2317	1544	1881	1076
123RC	F	Cre-	117	103	1926	Dark	43751.1	2951.53	21.163	20.916	0.247	1.9	2413.24	0.041	0.346	0.304	2.6	0.817623	0.4	0.5	3522	2490	2711	1440
123RC	F	Cre-	127	103	2106	Dark	43751.3	2948.71	21.163	21.041	0.123	2.1	2255.34	0.041	0.217	0.176	2.9	0.764856	0.2	0.5	18	4	39	4
123RC	F	Cre-	216	103	3708	Light	43752.4	2947.07	21.163	21.008	0.155	3.3	2476.62	0.048	0.265	0.218	4.8	0.840367	0.2	0.5	87	40	91	43
123RC	F	Cre-	11	103	18	Dark	43749.8	2944.59	21.163	20.948	0.215	0.2	2317.76	0.04	0.299	0.259	0.2	0.787126	0.3	0.5	4702	3687	3014	1793
123RC	F	Cre-	45	103	630	Dark	43750.2	2940.8	21.163	20.907	0.256	0.9	2622.39	0.046	0.33	0.284	1.1	0.891725	0.4	0.5	6877	5573	4572	3040
123RC	F	Cre-	281	103	4878	Dark	43753.2	2939	21.163	20.989	0.173	4.2	2527.92	0.047	0.282	0.234	6.3	0.86013	0.3	0.5	131	45	69	29
123RC	F	Cre-	252	103	4356	Dark	43752.8	2938.45	21.163	21.047	0.116	3.7	2697.17	0.042	0.252	0.21	5.6	0.917888	0.2	0.5	15	0	10	6
123RC	F	Cre-	283	103	4914	Dark	43753.2	2937.22	21.163	20.929	0.233	4.2	2488.17	0.047	0.374	0.327	6.4	0.847115	0.4	0.5	2926	1993	2541	1513
123RC	F	Cre-	214	103	3672	Light	43752.3	2935.86	21.163	20.929	0.234	3.3	2351.01	0.048	0.344	0.297	4.8	0.800789	0.4	0.5	948	387	897	273
123RC	F	Cre-	54	103	792	Light	43750.3	2934.81	21.163	21.029	0.134	1	2425.11	0.045	0.234	0.189	1.3	0.826328	0.2	0.5	8	1	11	4
123RC	F	Cre-	67	103	1026	Light	43750.5	2934.26	21.163	21.027	0.136	1.2	2439.7	0.041	0.227	0.187	1.5	0.831451	0.2	0.5	89	16	77	25
123RC	F	Cre-	37	103	486	Dark	43750.1	2933.13	21.163	20.908	0.255	0.7	2538.18	0.046	0.338	0.292	0.9	0.865349	0.4	0.5	6726	5484	4365	2917
123RC	F	Cre-	93	103	1494	Dark	43750.8	2932.03	21.163	20.932	0.231	1.5	2518.62	0.041	0.34	0.298	2.1	0.859	0.4	0.5	3839	2761	2593	1550
123RC	F	Cre-	77	103	1206	Light	43750.6	2929.66	21.163	20.975	0.188	1.3	2543.9	0.039	0.289	0.25	1.7	0.868327	0.3	0.5	991	334	699	187
123RC	F	Cre-	59	103	882	Light	43750.4	2923.27	21.163	20.931	0.232	1.1	2559.92	0.043	0.331	0.288	1.4	0.875702	0.4	0.5	4645	3582	3121	1953
123RC	F	Cre-	209	103	3582	Dark	43752.3	2919.35	21.163	20.916	0.246	3.2	2458.72	0.046	0.364	0.318	4.7	0.842215	0.4	0.5	2774	2021	1977	1133
123RC	F	Cre-	285	103	4950	Dark	43753.2	2916	21.163	20.946	0.216	4.3	2192.99	0.046	0.341	0.295	6.4	0.752053	0.3	0.5	488	113	489	93
123RC	F	Cre-	89	103	1422	Light	43750.8	2912.15	21.163	20.949	0.214	1.5	2633.48	0.041	0.321	0.28	2	0.904308	0.3	0.5	965	621	705	339
123RC	F	Cre-	239	103	4122	Light	43752.7	2909.58	21.163	21.067	0.096	3.6	2468.24	0.04	0.223	0.183	5.3	0.848313	0.2	0.5	29	8	13	4
123RC	F	Cre-	290	103	5040	Light	43753.3	2893.35	21.162	20.936	0.226	4.3	2382.7	0.049	0.348	0.299	6.6	0.82351	0.3	0.5	3021	2150	2382	1393
123RC	F	Cre-	245	103	4230	Light	43752.7	2890.19	21.163	20.999	0.165	3.6	2617.94	0.041	0.303	0.263	5.5	0.905802	0.3	0.5	1265	587	1239	417
123RC	F	Cre-	88	103	1404	Light	43750.8	2888.85	21.163	21.05	0.113	1.4	2194.64	0.041	0.218	0.178	1.9	0.759695	0.2	0.5	43	21	32	11
123RC	F	Cre-	289	103	5022	Dark	43753.3	2887.19	21.162	20.983	0.179	4.3	2580.02	0.048	0.314	0.265	6.5	0.893609	0.3	0.5	2524	1842	2016	1180
123RC	F	Cre-	236	103	4068	Light	43752.6	2884.79	21.163	21.065	0.098	3.5	2500.75	0.04	0.233	0.192	5.3	0.866874	0.2	0.5	35	1	18	4
123RC	F	Cre-	200	103	3420	Dark	43752.2	2883.31	21.163	20.921	0.242	3.1	2580.13	0.045	0.359	0.314	4.5	0.894848	0.4	0.5	4175	3244	3188	2001
123RC	F	Cre-	198	103	3384	Dark	43752.1	2880.67	21.163	20.927	0.236	3	2230.71	0.045	0.357	0.312	4.4	0.774371	0.4	0.5	3613	2653	2698	1715
123RC	F	Cre-	24	103	252	Dark	43750	2879.73	21.163	20.933	0.23	0.5	2347.68	0.045	0.324	0.279	0.6	0.815244	0.4	0.5	5995	4866	3823	2511
123RC	F	Cre-	151	103	2538	Light	43751.6	2878.7	21.163	21.038	0.125	2.4	2350.05	0.042	0.253	0.211	3.4	0.816356	0.2	0.5	217	84	189	53
123RC	F	Cre-	9	103	NA	NA	43749.8	2877.28	21.163	20.928	0.235	0.2	2360.12	0.04	0.311	0.271	0.2	0.82026	0.4	0.5	4689	3562	3033	1699
123RC	F	Cre-	300	103	5220	Light	43753.4	2874	21.163	21.016	0.146	4.5	2598.42	0.047	0.273	0.225	6.8	0.904112	0.2	0.5	169	76	164	38
123RC	F	Cre-	264	103	4572	Dark	43753	2872.4	21.163	20.912	0.251	3.9	2433.76	0.044	0.364	0.32	5.9	0.847291	0.4	0.5	3901	2853	3164	1996
123RC	F	Cre-	286	103	4968	Dark	43753.2	2871.02	21.163	21.032	0.13	4.3	2440.29	0.047	0.241	0.194	6.5	0.849974	0.2	0.5	25	7	28	11
123RC	F	Cre-	49	103	702	Dark	43750.3	2867.41	21.163	20.932	0.231	0.9	2246.41	0.045	0.318	0.273	1.2	0.783429	0.4	0.5	5597	4456	3758	2437
123RC	F	Cre-	184	103	3132	Dark	43752	2867.27	21.163	20.949	0.214	2.8	2440.27	0.042	0.336	0.295	4.1	0.851078	0.3	0.5	2558	1868	1838	1078
123RC	F	Cre-	97	103	1566	Dark	43750.9	2866.24	21.163	21.004	0.16	1.6	2333.65	0.041	0.267	0.226	2.2	0.814185	0.2	0.5	2599	1920	1757	1020
123RC	F	Cre-	94	103	1512	Dark	43750.8	2864.47	21.163	20.958	0.205	1.6	2248.23	0.041	0.307	0.266	2.1	0.784866	0.3	0.5	4013	3034	2777	1731
123RC	F	Cre-	212	103	3636	Light	43752.3	2858.68	21.163	20.924	0.238	3.3	2370.52	0.048	0.345	0.297	4.8	0.829237	0.4	0.5	3798	2642	2853	1695
123RC	F	Cre-	26	103	288	Dark	43750	2857.31	21.163	21.023	0.14	0.5	2421.59	0.045	0.25	0.205	0.6	0.847507	0.2	0.5	928	281	747	172
123RC	F	Cre-	188	103	3204	Dark	43752	2855.56	21.163	21.01	0.153	2.9	2332.8	0.042	0.274	0.232	4.2	0.816932	0.2	0.5	285	68	282	45
123RC	F	Cre-	46	103	648	Dark	43750.2	2846.36	21.163	20.913	0.25	0.9	2447.98	0.046	0.329	0.283	1.1	0.860037	0.4	0.5	5898	4569	4009	2530
123RC	F	Cre-	270	103	4680	Dark	43753	2845.79	21.163	20.902	0.261	4	2472.74	0.046	0.363	0.317	6.1	0.86891	0.4	0.5	2995	2063	2653	1705
123RC	F	Cre-	248	103	4284	Light	43752.8	2841.91	21.163	21.004	0.159	3.7	2591.58	0.042	0.297	0.256	5.5	0.911917	0.2	0.5	128	23	167	53
123RC	F	Cre-	254	103	4392	Dark	43752.8	2839.76	21.163	21.035	0.128	3.7	2347.36	0.042	0.263	0.221	5.6	0.826603	0.2	0.5	267	11	241	32
123RC	F	Cre-	288	103	5004	Dark	43753.3	2838.9	21.162	20.957	0.205	4.3	2266.14	0.049	0.321	0.272	6.5	0.798247	0.3	0.5	337	113	350	100
123RC	F	Cre-	277	103	4806	Dark	43753.1	2838.33	21.163	20.97	0.193	4.2	2350.69	0.046	0.304	0.258	6.3	0.828197	0.3	0.5	1528	1014	1282	674
123RC	F	Cre-	227	103	3906	Light	43752.5	2837.1	21.163	21.062	0.101	3.5	2341.05	0.041	0.216	0.175	5.1	0.825155	0.2	0.5	22	9	102	1
123RC	F	Cre-	123	103	2034	Dark	43751.2	2835.42	21.163	20.941	0.222	2	2327.24	0.042	0.31	0.268	2.8	0.820776	0.3	0.5	1716	1236	1233	653
123RC	F	Cre-	132	103	2196	Light	43751.3	2834.15	21.163	20.937	0.226	2.2	2449.26	0.042	0.326	0.284	3	0.864197	0.3	0.5	2810	2145	1907	1167
123RC	F	Cre-	247	103	4266	Light	43752.8	2832.63	21.163	21.042	0.121	3.7	2425.4	0.041	0.254	0.213	5.5	0.856236	0.2	0.5	184	97	129	55
123RC	F	Cre-	223	103	3834	Light	43752.5	2830.16	21.163	20.954	0.209	3.4	2568.84	0.045	0.344	0.299	5	0.907665	0.3	0.5	1967	1129	1460	724
123RC	F	Cre-	120	103	1980	Dark	43751.2	2824.01	21.163	20.939	0.224	2	2498.5	0.042	0.31	0.268	2.7	0.884734	0.3	0.5	3185	2178	2239	1223
123RC	F	Cre-	179	103	3042	Dark	43751.9	2819.46	21.163	20.962	0.201	2.7	2272.74	0.042	0.333	0.291	4	0.806092	0.3	0.5	3582	2783	2546	1613
123RC	F	Cre-	115	103	1890	Dark	43751.1	2818.98	21.163	20.911	0.252	1.9	2152.3	0.042	0.35	0.308	2.6	0.763501	0.4	0.5	4773	3605	3276	1945
123RC	F	Cre-	173	103	2934	Dark	43751.8	2818.8	21.163	21.07	0.094	2.6	2560.71	0.041	0.221	0.18	3.8	0.908439	0.1	0.5	16	1	22	4
123RC	F	Cre-	155	103	2610	Light	43751.6	2817.63	21.163	21.051	0.112	2.4	2312.59	0.041	0.24	0.199	3.4	0.820757	0.2	0.5	86	10	20	7
123RC	F	Cre-	14	103	72	Dark	43749.8	2817.02	21.163	20.951	0.212	0.3	2510	0.041	0.307	0.266	0.3	0.891013	0.3	0.5	3983	2926	2624	1470
123RC	F	Cre-	15	103	90	Dark	43749.9	2812.37	21.163	20.923	0.24	0.3	2584.41	0.042	0.337	0.295	0.3	0.918943	0.4	0.5	6007	4939	3685	2347
123RC	F	Cre-	169	103	2862	Light	43751.8	2810.8	21.163	21.061	0.102	2.6	2354.63	0.04	0.207	0.167	3.7	0.837708	0.2	0.5	6	0	11	3
123RC	F	Cre-	226	103	3888	Light	43752.5	2807.42	21.163	21.045	0.118	3.4	2142.74	0.041	0.236	0.195	5.1	0.763242	0.2	0.5	91	48	91	36
123RC	F	Cre-	107	103	1746	Dark	43751	2807.31	21.163	21.054	0.109	1.7	2088.1	0.043	0.215	0.172	2.4	0.743807	0.2	0.5	137	47	113	23
123RC	F	Cre-	168	103	2844	Light	43751.8	2806.24	21.163	21.054	0.109	2.6	2533.84	0.04	0.213	0.173	3.7	0.902933	0.2	0.5	40	4	32	6
123RC	F	Cre-	142	103	2376	Light	43751.4	2803.13	21.163	21.043	0.12	2.3	2383.68	0.041	0.241	0.2	3.2	0.850365	0.2	0.5	54	11	58	12
123RC	F	Cre-	238	103	4104	Light	43752.6	2803.09	21.163	21.036	0.127	3.6	2145.41	0.04	0.254	0.214	5.3	0.765373	0.2	0.5	234	49	252	50
123RC	F	Cre-	210	103	3600	Light	43752.3	2800.51	21.163	20.92	0.243	3.2	2375.68	0.047	0.361	0.314	4.7	0.848303	0.4	0.5	3495	2461	2464	1450
123RC	F	Cre-	147	103	2466	Light	43751.5	2797.75	21.163	20.979	0.184	2.3	2176.94	0.041	0.288	0.247	3.3	0.778102	0.3	0.5	2142	1266	1605	719
123RC	F	Cre-	48	103	684	Dark	43750.3	2796.23	21.163	20.956	0.207	0.9	2265.21	0.044	0.303	0.259	1.2	0.810094	0.3	0.5	3965	3092	2644	1643
123RC	F	Cre-	86	103	1368	Light	43750.7	2793.67	21.163	21.031	0.133	1.4	2283.6	0.04	0.246	0.206	1.9	0.81742	0.2	0.5	185	31	195	18
123RC	F	Cre-	134	103	2232	Light	43751.3	2788.34	21.163	20.99	0.173	2.2	2234.81	0.041	0.281	0.239	3	0.801484	0.3	0.5	764	341	591	217
123RC	F	Cre-	189	103	3222	Dark	43752	2782.24	21.163	21.019	0.144	2.9	2325.61	0.044	0.257	0.214	4.2	0.835879	0.2	0.5	91	21	234	18
123RC	F	Cre-	116	103	1908	Dark	43751.1	2782.05	21.163	20.902	0.261	1.9	2166.27	0.042	0.366	0.324	2.6	0.77866	0.4	0.5	4389	3410	3183	1963
123RC	F	Cre-	5	103	NA	NA	43749.7	2780.08	21.163	20.929	0.234	0.1	2260.2	0.039	0.324	0.285	0.1	0.812998	0.4	0.5	4198	2973	2968	1619
123RC	F	Cre-	196	103	3348	Dark	43752.1	2778.94	21.163	20.922	0.241	3	2399.68	0.045	0.363	0.318	4.3	0.863523	0.4	0.5	3053	2177	2326	1341
123RC	F	Cre-	4	103	NA	NA	43749.7	2773.74	21.163	20.934	0.229	0.1	2443.42	0.039	0.303	0.264	0.1	0.880913	0.3	0.5	4880	3648	3162	1873
123RC	F	Cre-	20	103	180	Dark	43749.9	2772.68	21.163	20.936	0.226	0.4	2119.77	0.044	0.312	0.267	0.5	0.76452	0.3	0.5	5091	4035	3210	1934
123RC	F	Cre-	156	103	2628	Light	43751.6	2771.89	21.163	21.057	0.106	2.4	2333.42	0.041	0.229	0.189	3.4	0.841813	0.2	0.5	24	8	74	5
123RC	F	Cre-	204	103	3492	Dark	43752.2	2770.8	21.163	20.959	0.204	3.1	2437.02	0.044	0.32	0.275	4.6	0.879534	0.3	0.5	2840	2068	2169	1322
123RC	F	Cre-	78	103	1224	Light	43750.6	2768.22	21.163	20.957	0.207	1.3	2077.88	0.039	0.312	0.272	1.8	0.750621	0.3	0.5	3655	2716	2371	1454
123RC	F	Cre-	271	103	4698	Dark	43753.1	2767.76	21.163	20.913	0.25	4	2677.95	0.046	0.357	0.31	6.1	0.967554	0.4	0.5	2470	1610	2122	1187
123RC	F	Cre-	167	103	2826	Light	43751.8	2767.45	21.163	21.001	0.162	2.6	2485.74	0.04	0.263	0.223	3.7	0.898205	0.2	0.5	249	40	252	55
123RC	F	Cre-	234	103	4032	Light	43752.6	2764.53	21.163	21.054	0.109	3.5	2550.85	0.04	0.248	0.209	5.2	0.922706	0.2	0.5	107	66	99	54
123RC	F	Cre-	171	103	2898	Dark	43751.8	2763.96	21.163	21.061	0.102	2.6	2153.55	0.04	0.231	0.191	3.8	0.779152	0.2	0.5	304	127	226	75
123RC	F	Cre-	76	103	1188	Light	43750.6	2763.27	21.163	21.051	0.112	1.3	2570.39	0.039	0.214	0.174	1.7	0.9302	0.2	0.5	295	138	175	64
123RC	F	Cre-	249	103	4302	Light	43752.8	2760.87	21.163	21.033	0.13	3.7	2052.75	0.042	0.267	0.226	5.5	0.743515	0.2	0.5	15	2	32	8
123RC	F	Cre-	219	103	3762	Light	43752.4	2758.45	21.162	21.042	0.12	3.4	2461.46	0.049	0.26	0.211	4.9	0.892332	0.2	0.5	21	3	5	2
123RC	F	Cre-	44	103	612	Dark	43750.2	2758.34	21.163	20.899	0.264	0.8	2532.25	0.046	0.336	0.29	1.1	0.918033	0.4	0.5	5682	4510	3742	2375
123RC	F	Cre-	12	103	36	Dark	43749.8	2755.62	21.163	20.939	0.224	0.2	2207.29	0.04	0.326	0.286	0.3	0.801013	0.3	0.5	4503	3391	2825	1619
123RC	F	Cre-	255	103	4410	Dark	43752.9	2750.27	21.163	21.021	0.142	3.7	2257.47	0.042	0.277	0.235	5.7	0.820817	0.2	0.5	247	142	183	83
123RC	F	Cre-	52	103	756	Light	43750.3	2749.65	21.163	21.004	0.159	1	2534.42	0.045	0.259	0.213	1.2	0.921726	0.2	0.5	358	169	262	84
123RC	F	Cre-	233	103	4014	Light	43752.6	2745.35	21.163	21.044	0.119	3.5	2477.81	0.04	0.258	0.218	5.2	0.902549	0.2	0.5	224	51	247	30
123RC	F	Cre-	51	103	738	Light	43750.3	2744.84	21.163	20.943	0.219	1	2395.09	0.045	0.306	0.26	1.2	0.872578	0.3	0.5	871	539	633	238
123RC	F	Cre-	292	103	5076	Light	43753.3	2738.93	21.162	20.937	0.225	4.4	2273.02	0.051	0.352	0.302	6.6	0.829892	0.3	0.5	1683	1124	1605	869
123RC	F	Cre-	136	103	2268	Light	43751.4	2738.72	21.163	21.009	0.154	2.2	2209.83	0.041	0.263	0.222	3.1	0.806883	0.2	0.5	109	20	114	47
123RC	F	Cre-	253	103	4374	Dark	43752.8	2736.83	21.163	21.011	0.152	3.7	2158.94	0.042	0.277	0.235	5.6	0.788848	0.2	0.5	285	60	208	53
123RC	F	Cre-	182	103	3096	Dark	43751.9	2731.72	21.163	20.943	0.22	2.8	2315.06	0.042	0.343	0.301	4	0.847471	0.3	0.5	2658	1823	2009	1132
123RC	F	Cre-	181	103	3078	Dark	43751.9	2729.31	21.163	20.94	0.223	2.8	2233.81	0.042	0.344	0.302	4	0.818451	0.3	0.5	3226	2512	2423	1508
123RC	F	Cre-	175	103	2970	Dark	43751.9	2729.12	21.163	20.944	0.219	2.7	2481.14	0.042	0.358	0.317	3.8	0.909138	0.3	0.5	1848	1238	1428	752
123RC	F	Cre-	75	103	1170	Light	43750.6	2725.12	21.163	20.943	0.22	1.3	2650.1	0.039	0.324	0.285	1.7	0.972474	0.3	0.5	1320	789	967	477
123RC	F	Cre-	90	103	1440	Dark	43750.8	2718.06	21.163	20.922	0.241	1.5	2344.36	0.041	0.347	0.306	2	0.862513	0.4	0.5	4066	3140	2915	1726
123RC	F	Cre-	153	103	2574	Light	43751.6	2717.96	21.163	21.052	0.111	2.4	2551.61	0.042	0.229	0.188	3.4	0.938799	0.2	0.5	9	2	17	3
123RC	F	Cre-	36	103	468	Dark	43750.1	2715.97	21.163	20.905	0.257	0.6	2177.56	0.045	0.332	0.287	0.8	0.801763	0.4	0.5	9488	7982	5690	3918
123RC	F	Cre-	21	103	198	Dark	43749.9	2715.13	21.163	20.924	0.239	0.4	2257.17	0.043	0.331	0.288	0.5	0.83133	0.4	0.5	5149	3901	3183	1984
123RC	F	Cre-	64	103	972	Light	43750.5	2710.58	21.163	21.019	0.145	1.2	2256.46	0.041	0.233	0.192	1.5	0.832462	0.2	0.5	372	90	288	81
123RC	F	Cre-	23	103	234	Dark	43750	2708.25	21.163	20.919	0.244	0.4	2133.96	0.044	0.341	0.297	0.5	0.787947	0.4	0.5	5831	4763	3717	2417
123RC	F	Cre-	84	103	1332	Light	43750.7	2708.13	21.163	21.057	0.107	1.4	2255.22	0.039	0.207	0.168	1.9	0.832761	0.2	0.5	50	16	28	1
123RC	F	Cre-	81	103	1278	Light	43750.7	2707.52	21.163	21.036	0.127	1.4	2262.66	0.039	0.238	0.199	1.8	0.835693	0.2	0.5	225	129	215	92
123RC	F	Cre-	293	103	5094	Light	43753.3	2704.65	21.162	20.938	0.224	4.4	2301.8	0.051	0.351	0.3	6.6	0.851055	0.3	0.5	988	391	1125	325
123RC	F	Cre-	70	103	1080	Light	43750.5	2698.46	21.163	21.005	0.158	1.2	2501.6	0.04	0.253	0.213	1.6	0.927046	0.2	0.5	323	120	338	63
123RC	F	Cre-	257	103	4446	Dark	43752.9	2698.08	21.163	21.054	0.109	3.8	2420.49	0.043	0.247	0.204	5.7	0.897116	0.2	0.5	4	1	32	13
123RC	F	Cre-	180	103	3060	Dark	43751.9	2696.64	21.163	20.948	0.215	2.8	2507.23	0.042	0.343	0.301	4	0.929763	0.3	0.5	3561	2459	2696	1563
123RC	F	Cre-	272	103	4716	Dark	43753.1	2692.09	21.163	20.92	0.243	4.1	2366.09	0.045	0.353	0.308	6.1	0.878908	0.4	0.5	2745	1850	2431	1327
123RC	F	Cre-	172	103	2916	Dark	43751.8	2692.04	21.163	21.068	0.095	2.6	2281.37	0.04	0.226	0.185	3.8	0.84745	0.1	0.5	10	1	38	5
123RC	F	Cre-	85	103	1350	Light	43750.7	2691.81	21.163	21.007	0.156	1.4	2383.96	0.04	0.254	0.214	1.9	0.885636	0.2	0.5	173	64	145	37
123RC	F	Cre-	199	103	3402	Dark	43752.2	2690.9	21.163	20.927	0.236	3	2002.25	0.045	0.351	0.305	4.4	0.744083	0.4	0.5	4213	3173	3116	1956
123RC	F	Cre-	128	103	2124	Dark	43751.3	2689.73	21.163	21.017	0.147	2.1	2248.92	0.041	0.24	0.199	2.9	0.836115	0.2	0.5	103	24	85	22
123RC	F	Cre-	87	103	1386	Light	43750.8	2684.47	21.163	21.046	0.118	1.4	2460.27	0.04	0.233	0.193	1.9	0.916482	0.2	0.5	77	38	71	36
123RC	F	Cre-	144	103	2412	Light	43751.5	2676.53	21.163	20.945	0.219	2.3	2102.41	0.041	0.332	0.291	3.2	0.7855	0.3	0.5	2364	1672	1767	973
123RC	F	Cre-	2	103	NA	NA	43749.7	2673.7	21.163	20.937	0.227	0	2394.85	0.039	0.31	0.272	0	0.895703	0.3	0.5	3702	2402	2409	1284
123RC	F	Cre-	92	103	1476	Dark	43750.8	2667.03	21.163	20.927	0.236	1.5	2283.97	0.041	0.332	0.29	2	0.856373	0.4	0.5	3271	2351	2222	1307
123RC	F	Cre-	241	103	4158	Light	43752.7	2663.09	21.163	21.004	0.16	3.6	2054	0.04	0.304	0.264	5.4	0.771285	0.2	0.5	339	126	392	65
123RC	F	Cre-	195	103	3330	Dark	43752.1	2662.7	21.163	20.932	0.231	3	2089.98	0.045	0.345	0.3	4.3	0.784911	0.4	0.5	2622	1849	1897	1048
123RC	F	Cre-	25	103	270	Dark	43750	2658.38	21.162	20.954	0.207	0.5	2453.61	0.045	0.302	0.257	0.6	0.922969	0.3	0.5	3908	2783	2594	1531
123RC	F	Cre-	296	103	5148	Light	43753.4	2658.26	21.162	21.013	0.149	4.4	2242.22	0.051	0.268	0.217	6.7	0.843494	0.2	0.5	151	85	112	55
123RC	F	Cre-	269	103	4662	Dark	43753	2657.8	21.163	20.912	0.25	4	2039.02	0.045	0.337	0.292	6	0.767184	0.4	0.5	2602	1530	2110	1109
123RC	F	Cre-	8	103	NA	NA	43749.8	2656.67	21.163	20.93	0.233	0.1	2297.9	0.039	0.308	0.268	0.2	0.864955	0.4	0.5	5498	4307	3567	2158
123RC	F	Cre-	145	103	2430	Light	43751.5	2655.8	21.163	21.043	0.121	2.3	2377.88	0.041	0.242	0.201	3.2	0.895352	0.2	0.5	1916	1347	1397	780
123RC	F	Cre-	109	103	1782	Dark	43751	2655.51	21.163	20.994	0.169	1.7	2067.08	0.042	0.287	0.245	2.4	0.778411	0.3	0.5	217	119	133	52
123RC	F	Cre-	297	103	5166	Light	43753.4	2655.4	21.162	20.969	0.193	4.4	2033.65	0.05	0.339	0.289	6.7	0.765856	0.3	0.5	733	283	478	185
123RC	F	Cre-	73	103	1134	Light	43750.6	2652.59	21.163	21.051	0.113	1.3	2079.15	0.04	0.205	0.164	1.7	0.783819	0.2	0.5	25	5	28	7
123RC	F	Cre-	265	103	4590	Dark	43753	2648.22	21.163	20.911	0.252	3.9	2478.22	0.045	0.365	0.319	5.9	0.935804	0.4	0.5	4249	3258	3428	2250
123RC	F	Cre-	55	103	810	Light	43750.4	2643.67	21.162	20.981	0.181	1	2252.37	0.051	0.283	0.231	1.3	0.851987	0.3	0.5	208	99	206	74
123RC	F	Cre-	177	103	3006	Dark	43751.9	2643.43	21.163	20.973	0.19	2.7	2628.72	0.042	0.33	0.288	3.9	0.994436	0.3	0.5	2216	1680	1651	1007
123RC	F	Cre-	220	103	3780	Light	43752.4	2635.12	21.163	21.035	0.128	3.4	2267.17	0.046	0.268	0.222	4.9	0.860365	0.2	0.5	159	100	116	49
123RC	F	Cre-	72	103	1116	Light	43750.6	2633.04	21.163	21.053	0.11	1.3	2479.26	0.04	0.203	0.162	1.6	0.941596	0.2	0.5	11	0	251	4
123RC	F	Cre-	105	103	1710	Dark	43751	2627.91	21.163	21.041	0.122	1.7	2004.12	0.044	0.23	0.185	2.3	0.762627	0.2	0.5	7	1	17	2
123RC	F	Cre-	56	103	828	Light	43750.4	2625.37	21.163	21.054	0.109	1	2054.95	0.045	0.213	0.168	1.3	0.782726	0.2	0.5	137	49	100	24
123RC	F	Cre-	69	103	1062	Light	43750.5	2624.7	21.163	20.992	0.171	1.2	2006.7	0.04	0.273	0.232	1.6	0.764545	0.3	0.5	1881	1242	1486	725
123RC	F	Cre-	104	103	1692	Dark	43751	2621.35	21.163	21.016	0.147	1.7	2341.06	0.044	0.258	0.214	2.3	0.893075	0.2	0.5	94	29	85	31
123RC	F	Cre-	174	103	2952	Dark	43751.8	2619.02	21.163	21.025	0.138	2.7	2130.03	0.041	0.272	0.231	3.8	0.813294	0.2	0.5	288	96	355	95
123RC	F	Cre-	201	103	3438	Dark	43752.2	2618.16	21.163	20.944	0.219	3.1	1956.63	0.045	0.332	0.287	4.5	0.74733	0.3	0.5	3655	2756	2659	1678
123RC	F	Cre-	259	103	4482	Dark	43752.9	2612.41	21.163	20.895	0.268	3.8	2415.4	0.044	0.405	0.361	5.8	0.924585	0.4	0.5	3562	2450	2843	1643
123RC	F	Cre-	143	103	2394	Light	43751.5	2607.58	21.163	20.964	0.199	2.3	2284.65	0.041	0.331	0.29	3.2	0.876161	0.3	0.5	901	573	701	285
123RC	F	Cre-	146	103	2448	Light	43751.5	2606.61	21.163	20.937	0.227	2.3	2211.25	0.04	0.335	0.294	3.3	0.848322	0.3	0.5	3784	2792	2491	1535
123RC	F	Cre-	242	103	4176	Light	43752.7	2604	21.163	20.971	0.192	3.6	2041.85	0.041	0.338	0.297	5.4	0.78412	0.3	0.5	2032	1388	1546	892
123RC	F	Cre-	295	103	5130	Light	43753.4	2598.37	21.162	21.048	0.114	4.4	2531.43	0.05	0.233	0.183	6.7	0.974237	0.2	0.5	38	10	48	14
123RC	F	Cre-	230	103	3960	Light	43752.5	2593.54	21.163	21.053	0.11	3.5	2114.35	0.04	0.236	0.195	5.2	0.815239	0.2	0.5	43	4	64	1
123RC	F	Cre-	41	103	558	Dark	43750.2	2590.3	21.163	20.898	0.264	0.8	1990.63	0.046	0.339	0.293	1	0.768491	0.4	0.5	8441	6956	5374	3669
123RC	F	Cre-	16	103	108	Dark	43749.9	2583.54	21.163	20.928	0.235	0.3	2161.49	0.043	0.33	0.287	0.4	0.83664	0.4	0.5	5512	4309	3452	2119
123RC	F	Cre-	211	103	3618	Light	43752.3	2581.53	21.163	20.927	0.236	3.2	2033.72	0.048	0.366	0.318	4.7	0.787797	0.4	0.5	3345	2349	2483	1457
123RC	F	Cre-	38	103	504	Dark	43750.1	2579.82	21.163	20.9	0.263	0.7	2362.74	0.046	0.345	0.299	0.9	0.915853	0.4	0.5	5750	4447	3702	2399
123RC	F	Cre-	22	103	216	Dark	43749.9	2578.87	21.163	20.926	0.237	0.4	2176.1	0.044	0.333	0.289	0.5	0.843819	0.4	0.5	6748	5522	4171	2686
123RC	F	Cre-	6	103	NA	NA	43749.7	2572.2	21.163	20.927	0.236	0.1	2400.57	0.038	0.307	0.268	0.1	0.933274	0.4	0.5	5257	4034	3240	1899
123RC	F	Cre-	291	103	5058	Light	43753.3	2563.69	21.162	20.925	0.237	4.4	2394.53	0.05	0.352	0.303	6.6	0.934018	0.4	0.5	2721	1843	2199	1338
123RC	F	Cre-	18	103	144	Dark	43749.9	2559.75	21.163	20.923	0.239	0.3	2118.48	0.044	0.321	0.277	0.4	0.827612	0.4	0.5	6234	5032	4000	2533
123RC	F	Cre-	47	103	666	Dark	43750.3	2551.33	21.163	20.903	0.26	0.9	2305.44	0.045	0.342	0.297	1.1	0.903621	0.4	0.5	4950	3849	3273	2067
123RC	F	Cre-	166	103	2808	Light	43751.7	2551.32	21.163	21.008	0.155	2.6	2024.6	0.04	0.267	0.226	3.7	0.79355	0.2	0.5	1969	1290	1412	796
123RC	F	Cre-	7	103	NA	NA	43749.8	2545.45	21.163	20.925	0.239	0.1	2429.76	0.039	0.316	0.277	0.1	0.954551	0.4	0.5	5302	4066	3375	2015
123RC	F	Cre-	111	103	1818	Dark	43751.1	2544.2	21.163	20.905	0.258	1.8	2093.99	0.042	0.368	0.326	2.5	0.823045	0.4	0.5	4604	3559	3265	2036
123RC	F	Cre-	62	103	936	Light	43750.4	2543.55	21.163	20.924	0.239	1.1	2083.91	0.042	0.334	0.291	1.5	0.81929	0.4	0.5	5439	4458	3556	2283
123RC	F	Cre-	263	103	4554	Dark	43753	2542.12	21.163	20.928	0.235	3.9	2458.26	0.045	0.34	0.294	5.9	0.967013	0.4	0.5	3047	2113	2462	1415
123RC	F	Cre-	106	103	1728	Dark	43751	2532.99	21.163	21.027	0.136	1.7	2312.2	0.045	0.245	0.2	2.3	0.912835	0.2	0.5	81	36	126	31
123RC	F	Cre-	80	103	1260	Light	43750.7	2532.12	21.163	21.027	0.136	1.4	2190.51	0.039	0.232	0.193	1.8	0.86509	0.2	0.5	310	51	354	64
123RC	F	Cre-	267	103	4626	Dark	43753	2530.48	21.163	20.9	0.263	4	2452.76	0.045	0.371	0.325	6	0.969284	0.4	0.5	3023	2134	2567	1480
123RC	F	Cre-	149	103	2502	Light	43751.5	2522.17	21.163	21.059	0.104	2.4	2330.97	0.041	0.209	0.169	3.3	0.924195	0.2	0.5	22	5	129	6
123RC	F	Cre-	251	103	4338	Dark	43752.8	2514.87	21.163	21.051	0.112	3.7	2431.16	0.042	0.252	0.21	5.6	0.966715	0.2	0.5	35	8	75	5
123RC	F	Cre-	33	103	414	Dark	43750.1	2507.15	21.163	20.931	0.232	0.6	2307.25	0.046	0.321	0.276	0.8	0.92027	0.4	0.5	5115	3990	3168	2052
123RC	F	Cre-	229	103	3942	Light	43752.5	2494.9	21.163	20.979	0.184	3.5	1967.59	0.04	0.317	0.277	5.1	0.788643	0.3	0.5	615	279	611	183
123RC	F	Cre-	82	103	1296	Light	43750.7	2487.99	21.163	21.048	0.115	1.4	2026.63	0.039	0.221	0.182	1.8	0.814568	0.2	0.5	219	24	55	23
123RC	F	Cre-	101	103	1638	Dark	43750.9	2487.6	21.163	21.03	0.133	1.7	2192.99	0.043	0.241	0.199	2.2	0.881567	0.2	0.5	68	7	50	9
123RC	F	Cre-	207	103	3546	Dark	43752.3	2486.44	21.163	21.029	0.134	3.2	2007.28	0.043	0.245	0.201	4.6	0.807292	0.2	0.5	62	17	39	5
123RC	F	Cre-	228	103	3924	Light	43752.5	2481.75	21.163	21.014	0.149	3.5	2062.85	0.04	0.261	0.221	5.1	0.831205	0.2	0.5	96	59	98	30
123RC	F	Cre-	71	103	1098	Light	43750.6	2477.34	21.163	21.045	0.118	1.3	2027.74	0.04	0.215	0.174	1.6	0.818517	0.2	0.5	22	3	26	2
123RC	F	Cre-	154	103	2592	Light	43751.6	2475.64	21.163	21.055	0.108	2.4	2307.32	0.041	0.238	0.197	3.4	0.932011	0.2	0.5	169	57	107	35
123RC	F	Cre-	268	103	4644	Dark	43753	2470.97	21.163	20.857	0.306	4	2358.54	0.046	0.392	0.346	6	0.954497	0.5	0.5	3853	2925	2988	1863
123RC	F	Cre-	258	103	4464	Dark	43752.9	2462.91	21.163	20.949	0.214	3.8	2169.85	0.044	0.361	0.317	5.7	0.88101	0.3	0.5	697	219	483	142
123RC	F	Cre-	187	103	3186	Dark	43752	2461.57	21.163	20.97	0.193	2.9	2206.28	0.044	0.305	0.261	4.2	0.89629	0.3	0.5	1495	922	1151	526
123RC	F	Cre-	278	103	4824	Dark	43753.1	2461.32	21.163	20.987	0.176	4.2	1858.64	0.047	0.28	0.233	6.3	0.755137	0.3	0.5	434	139	576	131
123RC	F	Cre-	99	103	1602	Dark	43750.9	2439.67	21.163	21.018	0.145	1.6	2053.2	0.042	0.257	0.215	2.2	0.84159	0.2	0.5	586	162	377	96
123RC	F	Cre-	133	103	2214	Light	43751.3	2429.72	21.163	21.036	0.128	2.2	2213.79	0.041	0.242	0.201	3	0.911133	0.2	0.5	1828	1206	1378	693
123RC	F	Cre-	164	103	2772	Light	43751.7	2427.07	21.163	20.933	0.23	2.6	2302.43	0.04	0.349	0.308	3.6	0.948645	0.4	0.5	2445	1751	1833	1007
123RC	F	Cre-	165	103	2790	Light	43751.7	2425.18	21.163	20.941	0.222	2.6	2257.95	0.041	0.333	0.292	3.7	0.931046	0.3	0.5	2539	1758	1885	990
123RC	F	Cre-	203	103	3474	Dark	43752.2	2422.38	21.163	20.929	0.234	3.1	2252.85	0.045	0.36	0.315	4.5	0.930016	0.4	0.5	3290	2327	2579	1557
123RC	F	Cre-	42	103	576	Dark	43750.2	2421.76	21.163	20.901	0.262	0.8	2080.59	0.046	0.333	0.287	1	0.859125	0.4	0.5	6994	5671	4685	3066
123RC	F	Cre-	256	103	4428	Dark	43752.9	2421.66	21.163	21.026	0.137	3.7	2294.96	0.042	0.275	0.233	5.7	0.947678	0.2	0.5	69	26	70	22
123RC	F	Cre-	141	103	2358	Light	43751.4	2419.3	21.163	21.06	0.103	2.3	2361.38	0.041	0.233	0.192	3.2	0.976059	0.2	0.5	27	7	92	17
123RC	F	Cre-	244	103	4212	Light	43752.7	2417.68	21.163	20.953	0.211	3.6	2071.88	0.04	0.347	0.307	5.4	0.856971	0.3	0.5	2851	1938	2339	1331
123RC	F	Cre-	19	103	162	Dark	43749.9	2388.79	21.163	20.931	0.232	0.4	2133.37	0.044	0.319	0.275	0.4	0.893076	0.4	0.5	6772	5439	4262	2699
123RC	F	Cre-	83	103	1314	Light	43750.7	2388.04	21.163	21.043	0.12	1.4	2292.93	0.039	0.222	0.183	1.9	0.960172	0.2	0.5	62	19	110	15
123RC	F	Cre-	13	103	54	Dark	43749.8	2375.43	21.163	20.928	0.235	0.2	2080.44	0.041	0.332	0.291	0.3	0.875817	0.4	0.5	4639	3498	2935	1717
123RC	F	Cre-	61	103	918	Light	43750.4	2372.17	21.163	20.912	0.251	1.1	1893.54	0.042	0.326	0.284	1.4	0.79823	0.4	0.5	5536	4475	3664	2409
123RC	F	Cre-	150	103	2520	Light	43751.5	2364.31	21.163	21.027	0.136	2.4	2115.51	0.042	0.235	0.193	3.3	0.894769	0.2	0.5	182	101	295	65
123RC	F	Cre-	282	103	4896	Dark	43753.2	2351.47	21.163	20.931	0.231	4.2	2186.67	0.046	0.365	0.319	6.4	0.929915	0.4	0.5	1305	697	998	493
123RC	F	Cre-	58	103	864	Light	43750.4	2346.27	21.163	20.931	0.232	1.1	2095.47	0.044	0.343	0.299	1.4	0.893107	0.4	0.5	1555	899	1297	580
123RC	F	Cre-	102	103	1656	Dark	43750.9	2336.76	21.163	21.037	0.126	1.7	1923.92	0.043	0.228	0.185	2.3	0.823326	0.2	0.5	44	18	10	1
123RC	F	Cre-	287	103	4986	Dark	43753.3	2335.66	21.162	21.042	0.121	4.3	1740.74	0.048	0.23	0.182	6.5	0.745287	0.2	0.5	13	2	20	8
123RC	F	Cre-	124	103	2052	Dark	43751.2	2333.46	21.163	20.981	0.182	2	1870.41	0.041	0.273	0.232	2.8	0.801561	0.3	0.5	2886	2021	2256	1236
123RC	F	Cre-	30	103	360	Dark	43750	2326.7	21.163	21.022	0.14	0.5	1741.1	0.046	0.25	0.203	0.7	0.748313	0.2	0.5	199	105	155	54
123RC	F	Cre-	31	103	378	Dark	43750.1	2312.85	21.163	21.034	0.129	0.5	1922.31	0.045	0.235	0.19	0.7	0.831146	0.2	0.5	29	6	18	1
123RC	F	Cre-	112	103	1836	Dark	43751.1	2304.92	21.163	20.914	0.25	1.8	2222.09	0.042	0.354	0.312	2.5	0.964065	0.4	0.5	3406	2556	2557	1460
123RC	F	Cre-	103	103	1674	Dark	43751	2287.91	21.163	20.987	0.176	1.7	1896.75	0.044	0.291	0.248	2.3	0.829031	0.3	0.5	517	198	437	133
123RC	F	Cre-	60	103	900	Light	43750.4	2275.92	21.163	20.924	0.239	1.1	1854.1	0.042	0.33	0.287	1.4	0.814659	0.4	0.5	3584	2498	2367	1233
123RC	F	Cre-	163	103	2754	Light	43751.7	2266.33	21.163	20.924	0.239	2.5	2051.36	0.041	0.353	0.313	3.6	0.905145	0.4	0.5	3053	2304	2221	1345
123RC	F	Cre-	125	103	2070	Dark	43751.2	2223.73	21.163	20.983	0.18	2.1	2106.78	0.041	0.284	0.243	2.8	0.947409	0.3	0.5	1754	1098	1502	719
123RC	F	Cre-	98	103	1584	Dark	43750.9	2203.44	21.163	21.043	0.12	1.6	2147.89	0.042	0.236	0.195	2.2	0.97479	0.2	0.5	854	645	547	296
123RC	F	Cre-	118	103	1944	Dark	43751.1	2196.03	21.163	20.918	0.245	1.9	1879.16	0.042	0.343	0.301	2.7	0.855708	0.4	0.5	4373	3397	3111	1855
123RC	F	Cre-	34	103	432	Dark	43750.1	2173.88	21.163	20.918	0.245	0.6	2101.04	0.046	0.342	0.296	0.8	0.966491	0.4	0.5	6027	4741	3959	2503
126LC	F	Cre-	50	101	720	Light	43750.3	3489.76	21.163	21.006	0.156	0.9	2940.92	0.045	0.246	0.201	1.1	0.842727	0.2	0.5	595	270	636	191
126LC	F	Cre-	250	101	4320	Dark	43752.8	3457.87	21.163	20.998	0.165	3.7	2765.22	0.041	0.298	0.257	5.5	0.799689	0.3	0.5	74	29	91	29
126LC	F	Cre-	170	101	2880	Dark	43751.8	3440.39	21.163	20.954	0.209	2.6	2940.62	0.04	0.336	0.296	3.7	0.854735	0.3	0.5	456	103	504	84
126LC	F	Cre-	139	101	2322	Light	43751.4	3374.53	21.163	20.957	0.206	2.2	2998.52	0.041	0.297	0.256	3	0.888573	0.3	0.5	1107	602	757	269
126LC	F	Cre-	223	101	3834	Light	43752.5	3372.65	21.163	21.042	0.121	3.4	2746.01	0.045	0.254	0.21	4.9	0.814201	0.2	0.5	240	112	292	67
126LC	F	Cre-	88	101	1404	Light	43750.8	3367.36	21.163	20.984	0.179	1.5	2825.88	0.041	0.272	0.231	2	0.839197	0.3	0.5	868	352	762	255
126LC	F	Cre-	41	101	558	Dark	43750.2	3332.56	21.163	20.994	0.169	0.7	2785.36	0.046	0.287	0.241	0.9	0.8358	0.3	0.5	438	111	534	100
126LC	F	Cre-	135	101	2250	Light	43751.4	3315.76	21.163	20.942	0.221	2.2	2550.21	0.046	0.33	0.285	3	0.769119	0.3	0.5	335	100	345	70
126LC	F	Cre-	111	101	1818	Dark	43751.1	3305.37	21.163	21.027	0.136	1.8	2770.32	0.042	0.236	0.194	2.5	0.838128	0.2	0.5	40	10	60	12
126LC	F	Cre-	91	101	1458	Dark	43750.8	3284.32	21.163	21.022	0.141	1.5	2590.43	0.041	0.254	0.213	2	0.788727	0.2	0.5	306	131	688	152
126LC	F	Cre-	295	101	5130	Light	43753.4	3266.99	21.162	21.045	0.118	4.4	2747.53	0.05	0.241	0.191	6.5	0.840996	0.2	0.5	36	9	47	9
126LC	F	Cre-	42	101	576	Dark	43750.2	3252.87	21.163	20.999	0.164	0.7	2684.65	0.046	0.278	0.232	0.9	0.825317	0.3	0.5	118	24	183	24
126LC	F	Cre-	229	101	3942	Light	43752.5	3247.39	21.163	21.023	0.14	3.5	2437.59	0.04	0.271	0.231	5	0.75063	0.2	0.5	110	20	96	18
126LC	F	Cre-	74	101	1152	Light	43750.6	3233.26	21.163	20.945	0.219	1.2	2498.67	0.04	0.29	0.25	1.6	0.772801	0.3	0.5	823	423	751	219
126LC	F	Cre-	283	101	4914	Dark	43753.2	3233.25	21.163	21.031	0.131	4.2	2515.42	0.047	0.276	0.23	6.3	0.777985	0.2	0.5	41	14	70	20
126LC	F	Cre-	168	101	2844	Light	43751.8	3199.36	21.163	20.959	0.205	2.6	2743.79	0.04	0.324	0.284	3.7	0.857605	0.3	0.5	2098	1209	1471	568
126LC	F	Cre-	78	101	1224	Light	43750.6	3185.19	21.163	20.965	0.198	1.3	2768.82	0.039	0.308	0.268	1.7	0.869277	0.3	0.5	231	83	369	58
126LC	F	Cre-	109	101	1782	Dark	43751	3178.5	21.163	21.013	0.15	1.8	2603.76	0.042	0.26	0.217	2.4	0.81918	0.2	0.5	289	94	362	96
126LC	F	Cre-	127	101	2106	Dark	43751.3	3163.44	21.163	20.934	0.229	2	2410.3	0.041	0.33	0.289	2.8	0.761924	0.4	0.5	1943	1150	1334	501
126LC	F	Cre-	68	101	1044	Light	43750.5	3163.25	21.163	21.032	0.131	1.1	2515.91	0.04	0.237	0.196	1.5	0.795357	0.2	0.5	35	5	25	6
126LC	F	Cre-	92	101	1476	Dark	43750.8	3158.84	21.163	21.028	0.135	1.5	2738.22	0.041	0.241	0.199	2	0.866842	0.2	0.5	44	13	44	14
126LC	F	Cre-	289	101	5022	Dark	43753.3	3158.17	21.162	21.052	0.11	4.3	2834.35	0.048	0.247	0.198	6.4	0.897468	0.2	0.5	63	13	66	14
126LC	F	Cre-	293	101	5094	Light	43753.3	3157.63	21.162	21.015	0.147	4.3	2657.27	0.051	0.27	0.219	6.5	0.841541	0.2	0.5	379	62	312	55
126LC	F	Cre-	70	101	1080	Light	43750.5	3154.36	21.163	21.015	0.148	1.2	2805.51	0.04	0.251	0.211	1.5	0.889407	0.2	0.5	41	21	248	22
126LC	F	Cre-	48	101	684	Dark	43750.3	3147.07	21.163	20.956	0.207	0.8	2486.06	0.044	0.276	0.232	1.1	0.78996	0.3	0.5	1135	559	1029	324
126LC	F	Cre-	290	101	5040	Light	43753.3	3146.59	21.162	21.036	0.127	4.3	2539.88	0.049	0.254	0.205	6.4	0.807186	0.2	0.5	12	1	86	24
126LC	F	Cre-	32	101	396	Dark	43750.1	3144.66	21.163	20.958	0.205	0.6	2460.35	0.045	0.326	0.281	0.7	0.782392	0.3	0.5	434	154	480	99
126LC	F	Cre-	43	101	594	Dark	43750.2	3141.01	21.163	21.003	0.16	0.7	2937.37	0.047	0.271	0.224	1	0.935168	0.2	0.5	25	1	39	9
126LC	F	Cre-	159	101	2682	Light	43751.7	3136.53	21.163	20.965	0.198	2.4	2450.82	0.04	0.298	0.258	3.4	0.78138	0.3	0.5	383	164	355	97
126LC	F	Cre-	257	101	4446	Dark	43752.9	3123.83	21.163	20.945	0.218	3.9	2774.85	0.043	0.299	0.256	5.7	0.888282	0.3	0.5	2974	2094	2105	1078
126LC	F	Cre-	271	101	4698	Dark	43753.1	3122.06	21.163	21.044	0.119	4.1	2562.89	0.046	0.248	0.201	6	0.820896	0.2	0.5	310	171	357	114
126LC	F	Cre-	169	101	2862	Light	43751.8	3121.91	21.163	21	0.164	2.6	2976.42	0.04	0.278	0.238	3.7	0.953397	0.3	0.5	309	25	527	79
126LC	F	Cre-	114	101	1872	Dark	43751.1	3121.25	21.163	21.023	0.14	1.9	2601.18	0.042	0.231	0.189	2.5	0.833378	0.2	0.5	57	22	87	8
126LC	F	Cre-	144	101	2412	Light	43751.5	3119.9	21.163	21.036	0.127	2.3	2573.25	0.041	0.254	0.213	3.1	0.824784	0.2	0.5	98	23	83	33
126LC	F	Cre-	103	101	1674	Dark	43751	3117.72	21.163	20.962	0.201	1.7	2315.15	0.044	0.295	0.251	2.3	0.742577	0.3	0.5	1812	1077	1349	579
126LC	F	Cre-	56	101	828	Light	43750.4	3117.1	21.163	20.951	0.212	1	2604.36	0.045	0.323	0.278	1.3	0.835506	0.3	0.5	1227	637	997	390
126LC	F	Cre-	195	101	3330	Dark	43752.1	3116.67	21.163	20.998	0.165	3	2419.05	0.045	0.284	0.239	4.3	0.776166	0.3	0.5	29	4	6	2
126LC	F	Cre-	172	101	2916	Dark	43751.8	3115.78	21.163	20.931	0.233	2.7	2639.75	0.04	0.349	0.309	3.8	0.84722	0.4	0.5	2596	1792	1694	755
126LC	F	Cre-	8	101	NA	NA	43749.8	3113.25	21.163	20.924	0.239	0.1	2514.71	0.039	0.308	0.269	0.2	0.807743	0.4	0.5	1356	806	1094	471
126LC	F	Cre-	236	101	4068	Light	43752.6	3106.88	21.163	20.984	0.179	3.5	2379.42	0.04	0.319	0.278	5.2	0.765854	0.3	0.5	417	124	426	81
126LC	F	Cre-	44	101	612	Dark	43750.2	3103.1	21.163	20.915	0.248	0.7	2346.72	0.046	0.369	0.323	1	0.756251	0.4	0.5	562	65	763	87
126LC	F	Cre-	27	101	306	Dark	43750	3101.93	21.163	20.988	0.174	0.5	2401.93	0.045	0.288	0.243	0.6	0.774332	0.3	0.5	527	138	586	137
126LC	F	Cre-	37	101	486	Dark	43750.1	3098.52	21.163	20.93	0.233	0.6	2449.93	0.046	0.346	0.301	0.8	0.790679	0.4	0.5	384	78	443	100
126LC	F	Cre-	228	101	3924	Light	43752.5	3092.9	21.163	21.031	0.133	3.5	2695.41	0.04	0.265	0.225	5	0.871482	0.2	0.5	190	61	248	56
126LC	F	Cre-	260	101	4500	Dark	43752.9	3090.49	21.163	20.961	0.202	3.9	2559.7	0.045	0.284	0.238	5.8	0.828251	0.3	0.5	2509	1669	2017	1049
126LC	F	Cre-	124	101	2052	Dark	43751.2	3087.35	21.163	21.025	0.138	2	2295.86	0.041	0.249	0.208	2.7	0.743633	0.2	0.5	144	9	119	8
126LC	F	Cre-	294	101	5112	Light	43753.3	3084.19	21.162	21.043	0.119	4.4	2461.69	0.051	0.252	0.201	6.5	0.798163	0.2	0.5	32	4	10	0
126LC	F	Cre-	31	101	378	Dark	43750.1	3078.18	21.163	20.954	0.209	0.5	2729.37	0.045	0.326	0.28	0.7	0.886683	0.3	0.5	230	35	290	51
126LC	F	Cre-	115	101	1890	Dark	43751.1	3077.26	21.163	21.028	0.136	1.9	2702.03	0.042	0.225	0.183	2.5	0.878063	0.2	0.5	33	10	24	9
126LC	F	Cre-	6	101	NA	NA	43749.7	3076.9	21.163	20.966	0.197	0.1	2459.22	0.038	0.274	0.236	0.1	0.799253	0.3	0.5	1088	513	1083	357
126LC	F	Cre-	179	101	3042	Dark	43751.9	3076.78	21.163	20.942	0.221	2.8	2744.52	0.042	0.297	0.255	3.9	0.892012	0.3	0.5	3633	2671	2405	1222
126LC	F	Cre-	263	101	4554	Dark	43753	3073.01	21.163	20.976	0.187	4	2733.94	0.045	0.274	0.228	5.8	0.889661	0.3	0.5	757	252	1011	259
126LC	F	Cre-	221	101	3798	Light	43752.4	3071.27	21.163	21.043	0.12	3.4	2672.74	0.046	0.257	0.211	4.8	0.870237	0.2	0.5	42	10	97	22
126LC	F	Cre-	204	101	3492	Dark	43752.2	3069.43	21.163	20.947	0.215	3.2	2757	0.044	0.299	0.254	4.5	0.898214	0.3	0.5	1873	1136	1902	665
126LC	F	Cre-	143	101	2394	Light	43751.5	3063.73	21.163	21.019	0.144	2.2	2498.72	0.041	0.273	0.233	3.1	0.81558	0.2	0.5	40	17	75	21
126LC	F	Cre-	265	101	4590	Dark	43753	3061.69	21.163	20.989	0.174	4	2770.23	0.045	0.294	0.248	5.9	0.904803	0.3	0.5	438	187	549	144
126LC	F	Cre-	87	101	1386	Light	43750.8	3060.6	21.163	20.924	0.24	1.4	2549.45	0.04	0.325	0.285	1.9	0.83299	0.4	0.5	1752	1122	1168	480
126LC	F	Cre-	182	101	3096	Dark	43751.9	3055.78	21.163	20.964	0.199	2.8	2515.18	0.042	0.283	0.242	4	0.823091	0.3	0.5	1782	956	1383	483
126LC	F	Cre-	72	101	1116	Light	43750.6	3054.69	21.163	20.928	0.235	1.2	2323.03	0.04	0.33	0.289	1.6	0.76048	0.4	0.5	2261	1410	1558	728
126LC	F	Cre-	58	101	864	Light	43750.4	3050.03	21.163	20.954	0.209	1	2680.01	0.044	0.312	0.268	1.3	0.878683	0.3	0.5	1138	568	698	186
126LC	F	Cre-	245	101	4230	Light	43752.7	3048.78	21.163	20.964	0.199	3.7	2656.73	0.041	0.344	0.303	5.4	0.871406	0.3	0.5	2195	1460	1887	870
126LC	F	Cre-	209	101	3582	Dark	43752.3	3048.32	21.163	21.024	0.139	3.2	2438	0.046	0.264	0.218	4.6	0.799784	0.2	0.5	402	87	448	109
126LC	F	Cre-	174	101	2952	Dark	43751.8	3027.17	21.163	20.936	0.228	2.7	2417.82	0.041	0.311	0.27	3.8	0.798707	0.3	0.5	3730	2727	2355	1192
126LC	F	Cre-	45	101	630	Dark	43750.2	3024.77	21.163	20.901	0.262	0.8	2568.94	0.046	0.343	0.297	1	0.8493	0.4	0.5	2400	1586	1514	726
126LC	F	Cre-	76	101	1188	Light	43750.6	3024.74	21.163	20.941	0.222	1.3	2523.87	0.039	0.315	0.276	1.7	0.83441	0.3	0.5	719	360	579	216
126LC	F	Cre-	77	101	1206	Light	43750.6	3024.23	21.163	20.998	0.165	1.3	2849.43	0.039	0.268	0.229	1.7	0.9422	0.3	0.5	126	15	136	26
126LC	F	Cre-	249	101	4302	Light	43752.8	3021.96	21.163	21.007	0.156	3.7	2506.16	0.042	0.285	0.243	5.5	0.829315	0.2	0.5	402	198	528	177
126LC	F	Cre-	39	101	522	Dark	43750.2	3020.87	21.163	20.99	0.172	0.7	2403.16	0.045	0.283	0.239	0.9	0.795517	0.3	0.5	38	9	79	27
126LC	F	Cre-	188	101	3204	Dark	43752	3018.82	21.163	21.012	0.151	2.9	2591.94	0.042	0.267	0.225	4.1	0.858594	0.2	0.5	119	17	39	11
126LC	F	Cre-	107	101	1746	Dark	43751	3013.73	21.163	20.959	0.204	1.8	2681.21	0.043	0.285	0.241	2.4	0.889666	0.3	0.5	328	162	258	77
126LC	F	Cre-	181	101	3078	Dark	43751.9	3009.14	21.163	20.951	0.212	2.8	2645.48	0.042	0.297	0.255	4	0.879149	0.3	0.5	3220	2267	2269	1185
126LC	F	Cre-	4	101	NA	NA	43749.7	3008.63	21.163	20.947	0.216	0.1	2642.97	0.039	0.288	0.249	0.1	0.878462	0.3	0.5	1517	749	1305	515
126LC	F	Cre-	12	101	36	Dark	43749.8	3005.18	21.163	20.967	0.196	0.2	2676.02	0.04	0.298	0.259	0.3	0.890471	0.3	0.5	1120	430	879	289
126LC	F	Cre-	298	101	5184	Light	43753.4	3001.71	21.162	21.041	0.121	4.4	2543.55	0.048	0.265	0.217	6.6	0.847369	0.2	0.5	38	8	62	23
126LC	F	Cre-	71	101	1098	Light	43750.6	2994.94	21.163	20.901	0.263	1.2	2638.68	0.04	0.358	0.318	1.6	0.881048	0.4	0.5	1384	607	1074	360
126LC	F	Cre-	89	101	1422	Light	43750.8	2993.93	21.163	21.02	0.143	1.5	2399.23	0.041	0.241	0.2	2	0.801367	0.2	0.5	142	30	75	24
126LC	F	Cre-	82	101	1296	Light	43750.7	2993.05	21.163	20.996	0.168	1.3	2357.49	0.039	0.275	0.236	1.8	0.787655	0.3	0.5	71	21	94	23
126LC	F	Cre-	121	101	1998	Dark	43751.2	2991.93	21.163	21.041	0.122	2	2280.75	0.041	0.227	0.186	2.7	0.7623	0.2	0.5	78	23	38	10
126LC	F	Cre-	112	101	1836	Dark	43751.1	2985.24	21.163	20.93	0.234	1.8	2218.8	0.042	0.338	0.296	2.5	0.743256	0.4	0.5	1026	426	1019	324
126LC	F	Cre-	234	101	4032	Light	43752.6	2984.31	21.163	21.035	0.129	3.5	2633.44	0.04	0.267	0.228	5.1	0.882428	0.2	0.5	240	81	284	65
126LC	F	Cre-	190	101	3240	Dark	43752	2983.38	21.163	20.969	0.194	3	2442.19	0.044	0.316	0.272	4.2	0.818599	0.3	0.5	538	283	543	181
126LC	F	Cre-	64	101	972	Light	43750.5	2979.17	21.163	21.011	0.152	1.1	2516.77	0.041	0.245	0.204	1.4	0.844789	0.2	0.5	73	23	49	9
126LC	F	Cre-	101	101	1638	Dark	43750.9	2978.34	21.163	20.977	0.186	1.7	2311.62	0.043	0.29	0.247	2.3	0.776143	0.3	0.5	1056	516	1023	326
126LC	F	Cre-	84	101	1332	Light	43750.7	2977.05	21.163	20.941	0.222	1.4	2635.57	0.039	0.294	0.255	1.9	0.885293	0.3	0.5	2362	1578	1478	709
126LC	F	Cre-	151	101	2538	Light	43751.6	2974.29	21.163	21.03	0.133	2.3	2565.93	0.042	0.257	0.215	3.3	0.862704	0.2	0.5	46	11	36	12
126LC	F	Cre-	186	101	3168	Dark	43752	2974.28	21.163	20.959	0.204	2.9	2544.17	0.043	0.32	0.277	4.1	0.855391	0.3	0.5	1890	1228	1266	578
126LC	F	Cre-	15	101	90	Dark	43749.9	2972.59	21.163	20.912	0.251	0.3	2364.93	0.042	0.312	0.27	0.3	0.79558	0.4	0.5	2534	1704	1766	883
126LC	F	Cre-	268	101	4644	Dark	43753	2970.2	21.163	21.004	0.159	4	2445.72	0.046	0.282	0.236	5.9	0.823419	0.2	0.5	1267	622	1332	517
126LC	F	Cre-	285	101	4950	Dark	43753.2	2964.02	21.163	21.039	0.124	4.2	2554.28	0.046	0.267	0.221	6.3	0.861763	0.2	0.5	109	12	155	38
126LC	F	Cre-	59	101	882	Light	43750.4	2962.78	21.163	21.016	0.147	1	2533.88	0.043	0.243	0.2	1.3	0.855235	0.2	0.5	338	20	165	25
126LC	F	Cre-	254	101	4392	Dark	43752.8	2960.87	21.163	20.93	0.234	3.8	2475.8	0.042	0.323	0.281	5.6	0.836172	0.4	0.5	3826	2905	2639	1493
126LC	F	Cre-	216	101	3708	Light	43752.4	2960.29	21.163	21.038	0.125	3.3	2351.61	0.048	0.246	0.198	4.7	0.794387	0.2	0.5	17	2	75	8
126LC	F	Cre-	230	101	3960	Light	43752.5	2957.59	21.163	21.032	0.131	3.5	2233.29	0.04	0.262	0.221	5	0.755105	0.2	0.5	55	19	85	23
126LC	F	Cre-	166	101	2808	Light	43751.7	2953.92	21.163	20.964	0.199	2.6	2340.94	0.04	0.283	0.243	3.6	0.792486	0.3	0.5	1980	1168	1389	542
126LC	F	Cre-	85	101	1350	Light	43750.7	2948.19	21.163	20.951	0.212	1.4	2358.01	0.04	0.286	0.246	1.9	0.799814	0.3	0.5	2016	1311	1561	642
126LC	F	Cre-	177	101	3006	Dark	43751.9	2943.47	21.163	20.936	0.228	2.8	2447.33	0.042	0.312	0.27	3.9	0.831446	0.3	0.5	2884	1949	2078	936
126LC	F	Cre-	220	101	3780	Light	43752.4	2942.59	21.163	21.033	0.13	3.4	2685.35	0.046	0.265	0.219	4.8	0.912583	0.2	0.5	103	15	116	17
126LC	F	Cre-	256	101	4428	Dark	43752.9	2939.93	21.163	20.936	0.227	3.9	2481.16	0.042	0.308	0.266	5.7	0.843953	0.3	0.5	3313	2438	2337	1218
126LC	F	Cre-	65	101	990	Light	43750.5	2938.95	21.163	21.025	0.138	1.1	2672.59	0.041	0.227	0.186	1.4	0.909369	0.2	0.5	60	26	78	20
126LC	F	Cre-	119	101	1962	Dark	43751.2	2934.18	21.163	20.964	0.2	1.9	2533.13	0.042	0.283	0.241	2.6	0.863318	0.3	0.5	1261	618	1050	359
126LC	F	Cre-	208	101	3564	Dark	43752.3	2930.27	21.163	20.988	0.175	3.2	2486.16	0.045	0.296	0.251	4.6	0.848441	0.3	0.5	605	253	388	133
126LC	F	Cre-	275	101	4770	Dark	43753.1	2925.8	21.163	21.012	0.15	4.1	2662.98	0.047	0.267	0.22	6.1	0.910169	0.2	0.5	443	104	665	172
126LC	F	Cre-	269	101	4662	Dark	43753	2925.07	21.163	20.964	0.199	4.1	2176.17	0.045	0.318	0.273	6	0.743971	0.3	0.5	332	65	372	116
126LC	F	Cre-	133	101	2214	Light	43751.3	2917.84	21.163	21.027	0.136	2.1	2684.89	0.041	0.25	0.208	2.9	0.920163	0.2	0.5	272	13	413	77
126LC	F	Cre-	118	101	1944	Dark	43751.1	2916.35	21.163	20.957	0.206	1.9	2477.85	0.042	0.279	0.238	2.6	0.849641	0.3	0.5	2590	1878	1793	888
126LC	F	Cre-	19	101	162	Dark	43749.9	2915.57	21.163	20.928	0.235	0.3	2413.36	0.044	0.299	0.255	0.4	0.827751	0.4	0.5	2197	1400	1357	642
126LC	F	Cre-	286	101	4968	Dark	43753.2	2909.83	21.163	21.024	0.139	4.3	2776.58	0.047	0.277	0.23	6.3	0.954208	0.2	0.5	21	10	37	12
126LC	F	Cre-	140	101	2340	Light	43751.4	2909.15	21.163	21.055	0.109	2.2	2341.86	0.041	0.218	0.177	3.1	0.804998	0.2	0.5	972	486	668	263
126LC	F	Cre-	296	101	5148	Light	43753.4	2909.11	21.162	21.029	0.133	4.4	2332.57	0.051	0.255	0.204	6.5	0.801816	0.2	0.5	397	149	530	140
126LC	F	Cre-	264	101	4572	Dark	43753	2907.43	21.163	21.016	0.147	4	2235.35	0.044	0.256	0.212	5.9	0.768842	0.2	0.5	121	29	165	43
126LC	F	Cre-	183	101	3114	Dark	43752	2907.02	21.163	20.981	0.182	2.9	2548.21	0.042	0.282	0.24	4	0.876571	0.3	0.5	1423	811	1227	427
126LC	F	Cre-	259	101	4482	Dark	43752.9	2905.44	21.163	20.953	0.21	3.9	2423.02	0.044	0.294	0.249	5.7	0.833959	0.3	0.5	2843	1963	2126	1039
126LC	F	Cre-	23	101	234	Dark	43750	2904.59	21.163	20.951	0.211	0.4	2362.36	0.044	0.3	0.256	0.5	0.813319	0.3	0.5	1069	572	804	258
126LC	F	Cre-	299	101	5202	Light	43753.4	2904.27	21.163	21.007	0.156	4.4	2793.43	0.047	0.298	0.25	6.6	0.961835	0.2	0.5	237	53	268	39
126LC	F	Cre-	102	101	1656	Dark	43750.9	2901.25	21.163	20.929	0.234	1.7	2556.71	0.043	0.338	0.295	2.3	0.881247	0.4	0.5	1484	936	1037	484
126LC	F	Cre-	187	101	3186	Dark	43752	2899.09	21.163	20.992	0.17	2.9	2337.11	0.044	0.287	0.243	4.1	0.806152	0.3	0.5	886	346	758	215
126LC	F	Cre-	194	101	3312	Dark	43752.1	2897.73	21.163	21.006	0.156	3	2457.16	0.045	0.279	0.235	4.3	0.84796	0.2	0.5	102	49	124	49
126LC	F	Cre-	16	101	108	Dark	43749.9	2897.15	21.163	20.924	0.239	0.3	2292.11	0.043	0.301	0.258	0.3	0.791161	0.4	0.5	2016	1206	1466	576
126LC	F	Cre-	104	101	1692	Dark	43751	2896.49	21.163	21.023	0.14	1.7	2463.82	0.044	0.228	0.184	2.3	0.850623	0.2	0.5	135	24	242	15
126LC	F	Cre-	105	101	1710	Dark	43751	2895.12	21.163	21.03	0.133	1.7	2519.89	0.044	0.222	0.177	2.3	0.870392	0.2	0.5	54	5	49	8
126LC	F	Cre-	196	101	3348	Dark	43752.1	2892.14	21.163	21.025	0.138	3	2187.78	0.045	0.266	0.221	4.3	0.756459	0.2	0.5	54	9	26	13
126LC	F	Cre-	243	101	4194	Light	43752.7	2886.39	21.163	20.983	0.18	3.6	2325.09	0.041	0.322	0.282	5.3	0.805537	0.3	0.5	1565	926	1207	430
126LC	F	Cre-	278	101	4824	Dark	43753.1	2885.78	21.163	21.024	0.139	4.2	2190.07	0.047	0.266	0.219	6.2	0.758918	0.2	0.5	29	6	42	9
126LC	F	Cre-	203	101	3474	Dark	43752.2	2882.87	21.163	21.017	0.146	3.1	2596.44	0.045	0.242	0.197	4.5	0.900646	0.2	0.5	55	14	62	20
126LC	F	Cre-	52	101	756	Light	43750.3	2861.31	21.163	21.019	0.144	0.9	2504.37	0.045	0.242	0.196	1.2	0.875255	0.2	0.5	198	88	187	47
126LC	F	Cre-	300	101	5220	Light	43753.4	2861.3	21.163	20.962	0.2	4.4	2428.01	0.047	0.331	0.284	6.6	0.84857	0.3	0.5	1585	977	1449	604
126LC	F	Cre-	152	101	2556	Light	43751.6	2860.84	21.163	20.968	0.195	2.4	2671.58	0.041	0.311	0.27	3.3	0.933847	0.3	0.5	1186	575	884	304
126LC	F	Cre-	57	101	846	Light	43750.4	2856.1	21.163	21.011	0.152	1	2438.11	0.044	0.242	0.198	1.3	0.853651	0.2	0.5	670	301	578	158
126LC	F	Cre-	120	101	1980	Dark	43751.2	2855.4	21.163	21.034	0.129	1.9	2577.81	0.042	0.23	0.188	2.6	0.902785	0.2	0.5	459	108	439	108
126LC	F	Cre-	213	101	3654	Light	43752.3	2853.81	21.163	20.948	0.215	3.3	2367.76	0.047	0.319	0.272	4.7	0.829685	0.3	0.5	893	497	814	225
126LC	F	Cre-	224	101	3852	Light	43752.5	2851.66	21.163	20.978	0.185	3.4	2356.63	0.045	0.31	0.265	4.9	0.826405	0.3	0.5	352	139	327	103
126LC	F	Cre-	98	101	1584	Dark	43750.9	2851.38	21.163	20.967	0.196	1.6	2310.4	0.042	0.27	0.229	2.2	0.810274	0.3	0.5	1335	758	1138	440
126LC	F	Cre-	122	101	2016	Dark	43751.2	2851.08	21.163	20.946	0.217	2	2435.85	0.042	0.322	0.28	2.7	0.854363	0.3	0.5	705	274	567	149
126LC	F	Cre-	226	101	3888	Light	43752.5	2849.77	21.163	21.041	0.122	3.4	2430.79	0.041	0.262	0.221	4.9	0.852978	0.2	0.5	361	78	335	83
126LC	F	Cre-	218	101	3744	Light	43752.4	2846.86	21.163	21.012	0.15	3.3	2487.38	0.047	0.268	0.221	4.8	0.873727	0.2	0.5	121	57	215	59
126LC	F	Cre-	148	101	2484	Light	43751.5	2845.58	21.163	20.976	0.187	2.3	2560.13	0.041	0.3	0.259	3.2	0.899688	0.3	0.5	748	309	822	261
126LC	F	Cre-	287	101	4986	Dark	43753.3	2843.59	21.162	21.033	0.129	4.3	2472.87	0.048	0.269	0.22	6.3	0.86963	0.2	0.5	34	12	64	14
126LC	F	Cre-	116	101	1908	Dark	43751.1	2840.95	21.163	20.986	0.177	1.9	2355.27	0.042	0.263	0.221	2.6	0.829043	0.3	0.5	97	25	174	44
126LC	F	Cre-	26	101	288	Dark	43750	2838.29	21.163	20.961	0.202	0.5	2385.23	0.045	0.296	0.251	0.6	0.840375	0.3	0.5	846	374	581	170
126LC	F	Cre-	162	101	2736	Light	43751.7	2837.9	21.163	20.924	0.24	2.5	2260.51	0.04	0.343	0.303	3.5	0.796544	0.4	0.5	429	108	256	63
126LC	F	Cre-	227	101	3906	Light	43752.5	2837.79	21.163	20.997	0.166	3.4	2129.88	0.041	0.304	0.263	5	0.750542	0.3	0.5	447	189	499	123
126LC	F	Cre-	129	101	2142	Dark	43751.3	2833.57	21.163	21.037	0.127	2.1	2429.14	0.041	0.234	0.194	2.8	0.857272	0.2	0.5	182	11	183	27
126LC	F	Cre-	126	101	2088	Dark	43751.2	2831.36	21.163	21.001	0.162	2	2591.66	0.041	0.266	0.225	2.8	0.915339	0.2	0.5	116	16	105	30
126LC	F	Cre-	164	101	2772	Light	43751.7	2823.77	21.163	20.98	0.183	2.5	2239.13	0.04	0.265	0.225	3.6	0.792955	0.3	0.5	1520	970	1121	425
126LC	F	Cre-	165	101	2790	Light	43751.7	2822.94	21.163	20.946	0.217	2.5	2402.97	0.041	0.289	0.248	3.6	0.851228	0.3	0.5	2780	2108	1719	834
126LC	F	Cre-	184	101	3132	Dark	43752	2822.5	21.163	21.012	0.151	2.9	2666.43	0.042	0.241	0.199	4	0.944705	0.2	0.5	31	6	49	18
126LC	F	Cre-	79	101	1242	Light	43750.7	2820.14	21.163	21.012	0.151	1.3	2446.04	0.039	0.268	0.228	1.8	0.867346	0.2	0.5	57	8	53	7
126LC	F	Cre-	30	101	360	Dark	43750	2820.07	21.163	20.992	0.171	0.5	2292.53	0.046	0.282	0.236	0.7	0.812934	0.3	0.5	153	55	301	49
126LC	F	Cre-	63	101	954	Light	43750.5	2819.88	21.163	21.005	0.158	1.1	2708.26	0.042	0.254	0.212	1.4	0.960417	0.2	0.5	631	160	586	122
126LC	F	Cre-	239	101	4122	Light	43752.7	2819.53	21.163	21.024	0.139	3.6	2500.57	0.04	0.277	0.238	5.2	0.886874	0.2	0.5	35	18	95	38
126LC	F	Cre-	130	101	2160	Light	43751.3	2815.9	21.163	21.018	0.145	2.1	2373.87	0.041	0.251	0.21	2.8	0.843025	0.2	0.5	74	26	76	20
126LC	F	Cre-	99	101	1602	Dark	43750.9	2813.99	21.163	20.946	0.217	1.6	2488.21	0.042	0.31	0.268	2.2	0.884228	0.3	0.5	634	119	499	104
126LC	F	Cre-	171	101	2898	Dark	43751.8	2808.16	21.163	20.961	0.202	2.6	2365.84	0.04	0.32	0.28	3.7	0.842487	0.3	0.5	3167	2393	1778	914
126LC	F	Cre-	86	101	1368	Light	43750.7	2803.95	21.163	20.953	0.21	1.4	2657.28	0.04	0.278	0.238	1.9	0.947694	0.3	0.5	1150	498	843	266
126LC	F	Cre-	282	101	4896	Dark	43753.2	2802.95	21.163	20.99	0.173	4.2	2411.85	0.046	0.316	0.27	6.2	0.860468	0.3	0.5	294	49	577	84
126LC	F	Cre-	1	101	NA	NA	43749.7	2801.97	21.163	20.871	0.292	0	2277.32	0.044	0.356	0.311	0	0.812755	0.4	0.5	218	78	138	51
126LC	F	Cre-	54	101	792	Light	43750.3	2794.08	21.163	20.936	0.227	0.9	2181.37	0.045	0.326	0.281	1.2	0.78071	0.3	0.5	2056	1313	1482	600
126LC	F	Cre-	225	101	3870	Light	43752.5	2792.65	21.163	20.968	0.196	3.4	2555.35	0.042	0.331	0.289	4.9	0.915028	0.3	0.5	1735	1045	1115	450
126LC	F	Cre-	62	101	936	Light	43750.4	2791.35	21.163	20.968	0.195	1	2494.98	0.042	0.276	0.234	1.4	0.893825	0.3	0.5	181	76	167	57
126LC	F	Cre-	176	101	2988	Dark	43751.9	2790.41	21.163	20.941	0.222	2.7	2599.98	0.042	0.302	0.261	3.9	0.931754	0.3	0.5	3561	2638	2329	1215
126LC	F	Cre-	280	101	4860	Dark	43753.2	2790.06	21.163	20.945	0.218	4.2	2461.75	0.047	0.36	0.313	6.2	0.882329	0.3	0.5	498	297	641	246
126LC	F	Cre-	266	101	4608	Dark	43753	2789.25	21.163	21.009	0.153	4	2477.76	0.045	0.276	0.231	5.9	0.888327	0.2	0.5	72	25	67	21
126LC	F	Cre-	240	101	4140	Light	43752.7	2788.26	21.163	21.034	0.129	3.6	2469.13	0.04	0.268	0.228	5.3	0.885543	0.2	0.5	46	24	62	27
126LC	F	Cre-	53	101	774	Light	43750.3	2787.27	21.163	20.917	0.246	0.9	2344.7	0.045	0.353	0.307	1.2	0.841217	0.4	0.5	962	420	823	217
126LC	F	Cre-	94	101	1512	Dark	43750.8	2787.18	21.163	20.946	0.217	1.5	2270.02	0.041	0.325	0.284	2.1	0.814452	0.3	0.5	1445	778	1146	405
126LC	F	Cre-	219	101	3762	Light	43752.4	2785.04	21.162	20.988	0.174	3.3	2560.63	0.049	0.314	0.265	4.8	0.919423	0.3	0.5	691	273	908	192
126LC	F	Cre-	47	101	666	Dark	43750.3	2782.98	21.163	20.949	0.214	0.8	2650.91	0.045	0.288	0.243	1.1	0.952542	0.3	0.5	1684	978	1352	548
126LC	F	Cre-	291	101	5058	Light	43753.3	2782.94	21.162	20.981	0.182	4.3	2273.5	0.05	0.305	0.256	6.4	0.816939	0.3	0.5	181	51	379	128
126LC	F	Cre-	288	101	5004	Dark	43753.3	2782.29	21.162	20.936	0.227	4.3	2412.48	0.049	0.37	0.321	6.4	0.867086	0.3	0.5	672	308	938	225
126LC	F	Cre-	161	101	2718	Light	43751.7	2780.05	21.163	21.006	0.157	2.5	2604	0.04	0.278	0.237	3.5	0.936676	0.2	0.5	65	11	49	10
126LC	F	Cre-	157	101	2646	Light	43751.6	2775.51	21.163	21.012	0.151	2.4	2554.59	0.04	0.268	0.228	3.4	0.920402	0.2	0.5	87	9	122	6
126LC	F	Cre-	178	101	3024	Dark	43751.9	2772.24	21.163	20.94	0.223	2.8	2161.39	0.042	0.299	0.257	3.9	0.779653	0.3	0.5	3645	2757	2315	1176
126LC	F	Cre-	301	101	5238	Light	43753.4	2770	21.163	21.053	0.11	4.4	2557.6	0.044	0.233	0.188	6.6	0.92332	0.2	0.5	487	107	526	87
126LC	F	Cre-	248	101	4284	Light	43752.8	2766.36	21.163	20.935	0.228	3.7	2517.65	0.042	0.366	0.324	5.5	0.910098	0.4	0.5	2498	1758	1705	816
126LC	F	Cre-	106	101	1728	Dark	43751	2765.91	21.163	20.969	0.194	1.7	2659.14	0.045	0.287	0.242	2.4	0.961401	0.3	0.5	1191	583	1241	337
126LC	F	Cre-	2	101	NA	NA	43749.7	2765.88	21.163	20.912	0.252	0	2340.31	0.039	0.322	0.283	0	0.846133	0.4	0.5	2328	1421	1723	842
126LC	F	Cre-	141	101	2358	Light	43751.4	2763.05	21.163	21.057	0.106	2.2	2476.34	0.041	0.233	0.192	3.1	0.896232	0.2	0.5	615	342	464	141
126LC	F	Cre-	108	101	1764	Dark	43751	2762.46	21.163	20.971	0.191	1.8	2414.44	0.043	0.292	0.249	2.4	0.874018	0.3	0.5	1405	712	1042	361
126LC	F	Cre-	217	101	3726	Light	43752.4	2760.29	21.163	21.028	0.134	3.3	2485.52	0.047	0.254	0.206	4.7	0.900454	0.2	0.5	42	18	85	27
126LC	F	Cre-	160	101	2700	Light	43751.7	2757.52	21.163	21.004	0.159	2.5	2329.48	0.04	0.28	0.24	3.5	0.844776	0.2	0.5	284	21	449	40
126LC	F	Cre-	199	101	3402	Dark	43752.2	2753.72	21.163	20.98	0.183	3.1	2386.03	0.045	0.316	0.271	4.4	0.866475	0.3	0.5	1031	581	897	331
126LC	F	Cre-	193	101	3294	Dark	43752.1	2743.49	21.163	21.004	0.159	3	2259.39	0.045	0.283	0.238	4.2	0.823546	0.2	0.5	28	5	39	5
126LC	F	Cre-	205	101	3510	Dark	43752.2	2742.37	21.163	20.98	0.183	3.2	2288.6	0.043	0.275	0.231	4.5	0.834533	0.3	0.5	1380	737	1075	365
126LC	F	Cre-	272	101	4716	Dark	43753.1	2738.79	21.163	21.032	0.131	4.1	2190.33	0.045	0.253	0.208	6	0.799743	0.2	0.5	38	4	60	9
126LC	F	Cre-	28	101	324	Dark	43750	2737.57	21.163	21.018	0.145	0.5	2633.26	0.045	0.26	0.216	0.6	0.961896	0.2	0.5	337	148	350	90
126LC	F	Cre-	279	101	4842	Dark	43753.2	2734.13	21.163	21.043	0.12	4.2	2325.55	0.047	0.251	0.204	6.2	0.850564	0.2	0.5	46	7	55	20
126LC	F	Cre-	202	101	3456	Dark	43752.2	2732.92	21.163	21.024	0.138	3.1	2488.75	0.045	0.241	0.196	4.4	0.910656	0.2	0.5	48	29	72	18
126LC	F	Cre-	191	101	3258	Dark	43752.1	2726.6	21.163	20.947	0.216	3	2375.27	0.044	0.344	0.3	4.2	0.871145	0.3	0.5	454	135	463	96
126LC	F	Cre-	20	101	180	Dark	43749.9	2725.96	21.163	20.936	0.227	0.4	2483.31	0.044	0.293	0.249	0.4	0.910984	0.3	0.5	1525	810	1211	497
126LC	F	Cre-	21	101	198	Dark	43749.9	2720.57	21.163	20.947	0.216	0.4	2488.16	0.043	0.307	0.264	0.5	0.914572	0.3	0.5	1387	664	1070	408
126LC	F	Cre-	206	101	3528	Dark	43752.2	2717.7	21.163	21.037	0.126	3.2	2244.08	0.043	0.243	0.199	4.5	0.825728	0.2	0.5	329	42	333	82
126LC	F	Cre-	235	101	4050	Light	43752.6	2715.46	21.163	21.053	0.111	3.5	2359.15	0.04	0.235	0.195	5.1	0.868784	0.2	0.5	29	11	22	9
126LC	F	Cre-	40	101	540	Dark	43750.2	2706.85	21.163	20.968	0.195	0.7	2260.14	0.045	0.298	0.252	0.9	0.834974	0.3	0.5	174	30	133	31
126LC	F	Cre-	9	101	NA	NA	43749.8	2705.86	21.163	20.982	0.181	0.2	2663.59	0.04	0.269	0.23	0.2	0.984379	0.3	0.5	672	203	824	159
126LC	F	Cre-	149	101	2502	Light	43751.5	2703.29	21.163	21.025	0.138	2.3	2144.52	0.041	0.263	0.222	3.2	0.793302	0.2	0.5	63	13	63	11
126LC	F	Cre-	22	101	216	Dark	43749.9	2703.15	21.163	20.948	0.215	0.4	2068.63	0.044	0.297	0.253	0.5	0.765264	0.3	0.5	1366	721	1110	386
126LC	F	Cre-	185	101	3150	Dark	43752	2703.07	21.163	20.957	0.206	2.9	2362.43	0.042	0.325	0.283	4.1	0.87398	0.3	0.5	1588	995	1135	506
126LC	F	Cre-	81	101	1278	Light	43750.7	2700.93	21.163	20.988	0.175	1.3	2480.7	0.039	0.288	0.25	1.8	0.918459	0.3	0.5	60	20	66	30
126LC	F	Cre-	252	101	4356	Dark	43752.8	2698.98	21.163	20.927	0.236	3.8	2415.61	0.042	0.364	0.322	5.6	0.895009	0.4	0.5	2297	1653	1650	780
126LC	F	Cre-	292	101	5076	Light	43753.3	2697.93	21.162	20.984	0.178	4.3	2263.92	0.051	0.285	0.235	6.5	0.839131	0.3	0.5	1750	969	1275	531
126LC	F	Cre-	90	101	1440	Dark	43750.8	2696.82	21.163	20.921	0.243	1.5	2570.04	0.041	0.342	0.301	2	0.952992	0.4	0.5	704	316	561	143
126LC	F	Cre-	60	101	900	Light	43750.4	2694.13	21.163	20.942	0.222	1	2414.93	0.042	0.302	0.259	1.3	0.896367	0.3	0.5	349	198	305	82
126LC	F	Cre-	96	101	1548	Dark	43750.9	2693.08	21.163	20.935	0.228	1.6	2203.71	0.041	0.322	0.282	2.1	0.818287	0.3	0.5	2210	1393	1558	732
126LC	F	Cre-	281	101	4878	Dark	43753.2	2690.65	21.163	21.007	0.155	4.2	2439.46	0.047	0.295	0.248	6.2	0.906643	0.2	0.5	1115	565	830	366
126LC	F	Cre-	163	101	2754	Light	43751.7	2685.83	21.163	20.951	0.213	2.5	2489.54	0.041	0.294	0.253	3.5	0.926915	0.3	0.5	3302	2453	2169	1168
126LC	F	Cre-	33	101	414	Dark	43750.1	2682.91	21.163	20.951	0.212	0.6	2206.19	0.046	0.328	0.282	0.7	0.822313	0.3	0.5	1035	374	739	226
126LC	F	Cre-	145	101	2430	Light	43751.5	2682.61	21.163	20.962	0.202	2.3	2108.07	0.041	0.311	0.27	3.2	0.785828	0.3	0.5	1906	1109	1409	611
126LC	F	Cre-	201	101	3438	Dark	43752.2	2679.06	21.163	21.014	0.149	3.1	2133.53	0.045	0.25	0.205	4.4	0.796372	0.2	0.5	29	8	26	6
126LC	F	Cre-	128	101	2124	Dark	43751.3	2678.8	21.163	20.96	0.203	2.1	2391.68	0.041	0.303	0.262	2.8	0.892816	0.3	0.5	1270	784	1060	360
126LC	F	Cre-	69	101	1062	Light	43750.5	2675.33	21.163	21.015	0.148	1.1	2098.78	0.04	0.252	0.212	1.5	0.784495	0.2	0.5	32	15	31	12
126LC	F	Cre-	192	101	3276	Dark	43752.1	2673.14	21.163	21.011	0.152	3	2262.27	0.044	0.273	0.229	4.2	0.846297	0.2	0.5	54	10	77	10
126LC	F	Cre-	83	101	1314	Light	43750.7	2672.92	21.163	20.916	0.247	1.4	2134.68	0.039	0.332	0.293	1.8	0.798631	0.4	0.5	924	450	1117	232
126LC	F	Cre-	222	101	3816	Light	43752.4	2669.53	21.163	20.962	0.2	3.4	2493.85	0.047	0.33	0.283	4.9	0.934189	0.3	0.5	332	146	401	135
126LC	F	Cre-	246	101	4248	Light	43752.7	2667.64	21.163	20.945	0.218	3.7	2216.83	0.041	0.357	0.316	5.4	0.831009	0.3	0.5	1599	1144	1041	407
126LC	F	Cre-	125	101	2070	Dark	43751.2	2667.18	21.163	21.039	0.124	2	2262.16	0.041	0.24	0.199	2.7	0.848147	0.2	0.5	51	11	40	4
126LC	F	Cre-	273	101	4734	Dark	43753.1	2665.47	21.163	20.963	0.2	4.1	2230.23	0.045	0.318	0.273	6	0.836711	0.3	0.5	1575	970	1252	501
126LC	F	Cre-	231	101	3978	Light	43752.6	2662.97	21.163	20.984	0.179	3.5	2465.99	0.04	0.315	0.275	5.1	0.926028	0.3	0.5	409	107	464	81
126LC	F	Cre-	241	101	4158	Light	43752.7	2662.83	21.163	20.936	0.228	3.6	2483.02	0.04	0.378	0.338	5.3	0.932475	0.4	0.5	482	158	502	143
126LC	F	Cre-	233	101	4014	Light	43752.6	2655.85	21.163	20.979	0.185	3.5	2034.73	0.04	0.324	0.284	5.1	0.766132	0.3	0.5	1753	841	1328	520
126LC	F	Cre-	80	101	1260	Light	43750.7	2655.59	21.163	20.99	0.174	1.3	1974.17	0.039	0.28	0.241	1.8	0.743404	0.3	0.5	27	6	22	12
126LC	F	Cre-	131	101	2178	Light	43751.3	2653.86	21.163	20.932	0.231	2.1	2431.13	0.041	0.348	0.307	2.9	0.916072	0.4	0.5	1173	688	766	268
126LC	F	Cre-	180	101	3060	Dark	43751.9	2652.56	21.163	20.955	0.208	2.8	2155.24	0.042	0.29	0.248	3.9	0.812513	0.3	0.5	2966	2143	2003	887
126LC	F	Cre-	100	101	1620	Dark	43750.9	2643.09	21.163	21.007	0.156	1.7	2204.02	0.043	0.26	0.218	2.2	0.833879	0.2	0.5	38	2	54	4
126LC	F	Cre-	146	101	2448	Light	43751.5	2641.76	21.163	21.05	0.113	2.3	2260.44	0.04	0.235	0.195	3.2	0.855659	0.2	0.5	801	365	582	158
126LC	F	Cre-	61	101	918	Light	43750.4	2639.41	21.163	21.044	0.12	1	2500.53	0.042	0.21	0.168	1.4	0.947381	0.2	0.5	151	72	184	35
126LC	F	Cre-	242	101	4176	Light	43752.7	2638.88	21.163	20.951	0.213	3.6	2393.34	0.041	0.354	0.313	5.3	0.906953	0.3	0.5	2690	1900	1860	942
126LC	F	Cre-	207	101	3546	Dark	43752.3	2637.91	21.163	21.024	0.139	3.2	2026.45	0.043	0.254	0.211	4.5	0.768203	0.2	0.5	32	5	53	8
126LC	F	Cre-	13	101	54	Dark	43749.8	2637.24	21.163	20.945	0.219	0.2	2416.31	0.041	0.296	0.255	0.3	0.916224	0.3	0.5	1483	661	1032	358
126LC	F	Cre-	244	101	4212	Light	43752.7	2630.39	21.163	20.947	0.216	3.6	2007.86	0.04	0.357	0.317	5.4	0.763334	0.3	0.5	1980	1231	1448	618
126LC	F	Cre-	97	101	1566	Dark	43750.9	2627.25	21.163	20.946	0.217	1.6	2214.47	0.041	0.29	0.248	2.2	0.842886	0.3	0.5	2672	1876	1768	844
126LC	F	Cre-	36	101	468	Dark	43750.1	2624.38	21.163	21.009	0.154	0.6	2541.75	0.045	0.274	0.229	0.8	0.968512	0.2	0.5	39	7	24	8
126LC	F	Cre-	258	101	4464	Dark	43752.9	2623.84	21.163	20.945	0.218	3.9	2438.36	0.044	0.297	0.253	5.7	0.929308	0.3	0.5	3056	2255	2253	1246
126LC	F	Cre-	189	101	3222	Dark	43752	2616.18	21.163	20.942	0.221	2.9	2208.82	0.044	0.341	0.297	4.1	0.844291	0.3	0.5	346	127	650	171
126LC	F	Cre-	150	101	2520	Light	43751.5	2613.78	21.163	21.016	0.147	2.3	2411.64	0.042	0.27	0.228	3.3	0.922666	0.2	0.5	62	20	81	16
126LC	F	Cre-	158	101	2664	Light	43751.6	2611.97	21.163	21.017	0.146	2.4	2531.4	0.04	0.255	0.214	3.4	0.969156	0.2	0.5	62	24	46	13
126LC	F	Cre-	267	101	4626	Dark	43753	2608.3	21.163	20.957	0.206	4	1977.28	0.045	0.321	0.276	5.9	0.758075	0.3	0.5	1323	732	980	439
126LC	F	Cre-	113	101	1854	Dark	43751.1	2605.85	21.163	21.005	0.158	1.8	2422.78	0.042	0.247	0.205	2.5	0.929748	0.2	0.5	124	31	106	13
126LC	F	Cre-	284	101	4932	Dark	43753.2	2605.33	21.163	21.004	0.159	4.2	2652.94	0.047	0.285	0.238	6.3	1.01827	0.2	0.5	107	31	76	13
126LC	F	Cre-	142	101	2376	Light	43751.4	2601.89	21.163	21.043	0.12	2.2	2586.94	0.041	0.249	0.208	3.1	0.994255	0.2	0.5	90	13	73	21
126LC	F	Cre-	232	101	3996	Light	43752.6	2598.74	21.163	20.951	0.212	3.5	2366.85	0.04	0.343	0.303	5.1	0.910769	0.3	0.5	1836	1058	1531	600
126LC	F	Cre-	214	101	3672	Light	43752.3	2586.66	21.163	20.981	0.182	3.3	2263.54	0.048	0.282	0.234	4.7	0.875084	0.3	0.5	1643	1039	1445	565
126LC	F	Cre-	198	101	3384	Dark	43752.1	2585.1	21.163	20.966	0.197	3.1	2384.34	0.045	0.329	0.284	4.4	0.92234	0.3	0.5	2049	1331	1541	710
126LC	F	Cre-	156	101	2628	Light	43751.6	2577.64	21.163	21.021	0.142	2.4	2374.18	0.041	0.261	0.22	3.4	0.921066	0.2	0.5	330	153	279	89
126LC	F	Cre-	66	101	1008	Light	43750.5	2575.3	21.163	21.005	0.158	1.1	2201.43	0.041	0.243	0.202	1.5	0.854823	0.2	0.5	82	42	75	31
126LC	F	Cre-	132	101	2196	Light	43751.3	2558.47	21.163	20.972	0.191	2.1	2310.04	0.042	0.306	0.264	2.9	0.9029	0.3	0.5	2548	1823	1732	865
126LC	F	Cre-	46	101	648	Dark	43750.2	2551.25	21.163	20.916	0.246	0.8	2255.15	0.046	0.316	0.27	1	0.883938	0.4	0.5	2264	1441	1404	679
126LC	F	Cre-	14	101	72	Dark	43749.8	2546.62	21.163	20.944	0.219	0.2	2042.03	0.041	0.288	0.247	0.3	0.801857	0.3	0.5	1958	1123	1406	632
126LC	F	Cre-	67	101	1026	Light	43750.5	2544.38	21.163	20.921	0.242	1.1	2190.55	0.041	0.335	0.295	1.5	0.860938	0.4	0.5	545	177	645	145
126LC	F	Cre-	154	101	2592	Light	43751.6	2544.1	21.163	21.031	0.132	2.4	2175.95	0.041	0.236	0.195	3.3	0.855295	0.2	0.5	1315	745	947	368
126LC	F	Cre-	147	101	2466	Light	43751.5	2539.31	21.163	20.966	0.197	2.3	1931.21	0.041	0.314	0.273	3.2	0.760525	0.3	0.5	1360	808	1139	397
126LC	F	Cre-	297	101	5166	Light	43753.4	2539.25	21.162	21.061	0.102	4.4	2199.05	0.05	0.243	0.192	6.5	0.866024	0.2	0.5	184	59	113	27
126LC	F	Cre-	173	101	2934	Dark	43751.8	2537.31	21.163	20.941	0.223	2.7	2285.2	0.041	0.32	0.279	3.8	0.900641	0.3	0.5	3733	2783	2500	1346
126LC	F	Cre-	134	101	2232	Light	43751.3	2529.72	21.163	21.037	0.126	2.1	2205.44	0.041	0.251	0.21	2.9	0.87181	0.2	0.5	82	16	123	47
126LC	F	Cre-	155	101	2610	Light	43751.6	2528.38	21.163	21.013	0.15	2.4	2342.72	0.041	0.244	0.204	3.4	0.926572	0.2	0.5	430	82	516	107
126LC	F	Cre-	25	101	270	Dark	43750	2523.46	21.162	21.002	0.16	0.5	2170.62	0.045	0.263	0.218	0.6	0.860176	0.2	0.5	145	37	190	52
126LC	F	Cre-	197	101	3366	Dark	43752.1	2521.11	21.163	20.928	0.235	3.1	1949.84	0.045	0.371	0.326	4.3	0.773408	0.4	0.5	1190	728	989	367
126LC	F	Cre-	276	101	4788	Dark	43753.1	2520.82	21.163	21.036	0.127	4.1	2653.23	0.046	0.252	0.205	6.1	1.05253	0.2	0.5	117	73	165	50
126LC	F	Cre-	117	101	1926	Dark	43751.1	2520.75	21.163	20.942	0.221	1.9	1982.87	0.041	0.29	0.248	2.6	0.786618	0.3	0.5	1877	1151	1333	532
126LC	F	Cre-	251	101	4338	Dark	43752.8	2519.01	21.163	20.932	0.231	3.8	2197.86	0.042	0.365	0.323	5.5	0.872511	0.4	0.5	278	42	386	62
126LC	F	Cre-	138	101	2304	Light	43751.4	2506.32	21.163	21.038	0.125	2.2	2065.63	0.041	0.228	0.187	3	0.824168	0.2	0.5	49	20	51	15
126LC	F	Cre-	110	101	1800	Dark	43751	2481.01	21.163	21.009	0.154	1.8	1993.14	0.042	0.255	0.213	2.4	0.803358	0.2	0.5	43	9	39	7
126LC	F	Cre-	261	101	4518	Dark	43752.9	2477.57	21.163	20.957	0.205	3.9	2298.41	0.045	0.288	0.243	5.8	0.927686	0.3	0.5	2401	1589	1837	821
126LC	F	Cre-	34	101	432	Dark	43750.1	2475.11	21.163	20.964	0.199	0.6	2354.15	0.046	0.32	0.274	0.8	0.951126	0.3	0.5	247	101	230	41
126LC	F	Cre-	73	101	1134	Light	43750.6	2473.71	21.163	20.95	0.214	1.2	2413.91	0.04	0.302	0.262	1.6	0.975824	0.3	0.5	1633	865	1295	485
126LC	F	Cre-	211	101	3618	Light	43752.3	2467.85	21.163	21.031	0.131	3.2	2703.36	0.048	0.253	0.205	4.6	1.09543	0.2	0.5	41	17	31	5
126LC	F	Cre-	51	101	738	Light	43750.3	2450.3	21.163	21.005	0.158	0.9	2250.52	0.045	0.255	0.209	1.1	0.918469	0.2	0.5	261	100	256	64
126LC	F	Cre-	137	101	2286	Light	43751.4	2446.83	21.163	21.053	0.11	2.2	2107.4	0.041	0.217	0.176	3	0.861279	0.2	0.5	226	26	258	63
126LC	F	Cre-	24	101	252	Dark	43750	2444.41	21.163	20.968	0.195	0.4	2142.61	0.045	0.305	0.26	0.5	0.876535	0.3	0.5	426	96	740	125
126LC	F	Cre-	253	101	4374	Dark	43752.8	2444.22	21.163	20.936	0.227	3.8	2233.44	0.042	0.326	0.283	5.6	0.913762	0.3	0.5	3225	2294	2168	1103
126LC	F	Cre-	153	101	2574	Light	43751.6	2440.94	21.163	20.95	0.213	2.4	2190.42	0.042	0.326	0.285	3.3	0.897365	0.3	0.5	2457	1791	1787	874
126LC	F	Cre-	29	101	342	Dark	43750	2438.99	21.163	20.962	0.201	0.5	2257	0.045	0.314	0.269	0.6	0.925381	0.3	0.5	356	65	391	77
126LC	F	Cre-	123	101	2034	Dark	43751.2	2429.36	21.163	20.96	0.203	2	2225.51	0.042	0.304	0.262	2.7	0.916089	0.3	0.5	1420	652	1324	439
126LC	F	Cre-	175	101	2970	Dark	43751.9	2427.26	21.163	20.933	0.23	2.7	2207.17	0.042	0.311	0.27	3.8	0.909324	0.4	0.5	3396	2385	2440	1266
126LC	F	Cre-	18	101	144	Dark	43749.9	2419.58	21.163	20.917	0.246	0.3	2349.51	0.044	0.319	0.275	0.4	0.97104	0.4	0.5	2186	1484	1451	592
126LC	F	Cre-	93	101	1494	Dark	43750.8	2417.98	21.163	20.938	0.225	1.5	2153.88	0.041	0.318	0.277	2.1	0.890777	0.3	0.5	340	119	315	79
126LC	F	Cre-	5	101	NA	NA	43749.7	2407.41	21.163	20.953	0.21	0.1	2285.89	0.039	0.282	0.244	0.1	0.949522	0.3	0.5	1277	473	1033	307
126LC	F	Cre-	274	101	4752	Dark	43753.1	2401.95	21.163	20.98	0.183	4.1	2299.21	0.046	0.311	0.265	6.1	0.957225	0.3	0.5	1057	369	1144	331
126LC	F	Cre-	167	101	2826	Light	43751.8	2392.13	21.163	20.941	0.222	2.6	2025.31	0.04	0.338	0.298	3.6	0.846655	0.3	0.5	2694	1881	1673	787
126LC	F	Cre-	35	101	450	Dark	43750.1	2389.19	21.163	20.991	0.172	0.6	2366.66	0.045	0.287	0.242	0.8	0.99057	0.3	0.5	383	113	403	94
126LC	F	Cre-	3	101	NA	NA	43749.7	2388.86	21.163	20.951	0.213	0	2164.18	0.039	0.287	0.248	0.1	0.905946	0.3	0.5	1847	1004	1396	592
126LC	F	Cre-	75	101	1170	Light	43750.6	2373.65	21.163	20.999	0.164	1.2	2159.86	0.039	0.237	0.198	1.7	0.909932	0.3	0.5	375	78	358	74
126LC	F	Cre-	210	101	3600	Light	43752.3	2369.56	21.163	21.03	0.133	3.2	2270.81	0.047	0.258	0.211	4.6	0.958328	0.2	0.5	30	2	27	2
126LC	F	Cre-	262	101	4536	Dark	43752.9	2368.7	21.163	20.977	0.186	4	2337.59	0.044	0.276	0.232	5.8	0.986865	0.3	0.5	1860	1079	1672	715
126LC	F	Cre-	136	101	2268	Light	43751.4	2366.63	21.163	20.99	0.173	2.2	2189.02	0.041	0.272	0.231	3	0.924954	0.3	0.5	2392	1562	1640	706
126LC	F	Cre-	277	101	4806	Dark	43753.1	2353.59	21.163	21.034	0.129	4.2	2149.36	0.046	0.259	0.213	6.1	0.913227	0.2	0.5	65	8	54	17
126LC	F	Cre-	49	101	702	Dark	43750.3	2351.42	21.163	20.93	0.233	0.8	2093.27	0.045	0.313	0.267	1.1	0.890212	0.4	0.5	1215	707	765	283
126LC	F	Cre-	200	101	3420	Dark	43752.2	2346.55	21.163	20.969	0.193	3.1	1999.3	0.045	0.301	0.256	4.4	0.852016	0.3	0.5	110	23	324	77
126LC	F	Cre-	247	101	4266	Light	43752.8	2337.55	21.163	20.964	0.199	3.7	2251.92	0.041	0.337	0.295	5.4	0.96337	0.3	0.5	2011	1259	1576	619
126LC	F	Cre-	38	101	504	Dark	43750.1	2326.4	21.163	20.993	0.17	0.7	2351.16	0.046	0.284	0.238	0.9	1.01064	0.3	0.5	1004	383	793	241
126LC	F	Cre-	270	101	4680	Dark	43753	2319.48	21.163	21.002	0.16	4.1	2030.49	0.046	0.275	0.229	6	0.875405	0.2	0.5	20	5	50	15
126LC	F	Cre-	238	101	4104	Light	43752.6	2288.29	21.163	21.034	0.129	3.6	1939.01	0.04	0.266	0.226	5.2	0.847363	0.2	0.5	105	61	69	31
126LC	F	Cre-	17	101	126	Dark	43749.9	2287.51	21.163	20.924	0.239	0.3	1971.39	0.043	0.311	0.268	0.4	0.861804	0.4	0.5	1978	1143	1408	596
126LC	F	Cre-	212	101	3636	Light	43752.3	2284.57	21.163	21.023	0.14	3.3	1876.4	0.048	0.251	0.203	4.6	0.821337	0.2	0.5	82	38	65	23
126LC	F	Cre-	10	101	0	Dark	43749.8	2278.71	21.163	20.926	0.238	0.2	1959.13	0.039	0.318	0.279	0.2	0.859755	0.4	0.5	555	275	389	112
126LC	F	Cre-	255	101	4410	Dark	43752.9	2258.27	21.163	20.93	0.233	3.8	2154.45	0.042	0.318	0.276	5.7	0.954027	0.4	0.5	3371	2523	2447	1336
126LC	F	Cre-	11	101	18	Dark	43749.8	2253.41	21.163	20.966	0.197	0.2	2172.08	0.04	0.289	0.249	0.2	0.963905	0.3	0.5	981	432	681	238
126LC	F	Cre-	215	101	3690	Light	43752.4	2229.8	21.163	20.972	0.19	3.3	2158.9	0.048	0.302	0.254	4.7	0.968203	0.3	0.5	480	120	352	66
126LC	F	Cre-	55	101	810	Light	43750.4	2229.29	21.162	20.924	0.239	0.9	2062.73	0.051	0.332	0.281	1.2	0.925285	0.4	0.5	633	303	666	191
126LC	F	Cre-	7	101	NA	NA	43749.8	2202.22	21.163	20.967	0.196	0.1	1966.93	0.039	0.274	0.235	0.1	0.893159	0.3	0.5	827	304	912	251
126LC	F	Cre-	237	101	4086	Light	43752.6	2187.82	21.163	21.026	0.137	3.6	2138.75	0.04	0.273	0.233	5.2	0.977571	0.2	0.5	43	6	177	37
126LC	F	Cre-	95	101	1530	Dark	43750.9	2125.87	21.163	20.92	0.243	1.6	1668.06	0.041	0.348	0.307	2.1	0.784648	0.4	0.5	2899	2057	1919	975
126BC	F	Cre-	225	101	3564	Dark	43756.3	2971.71	21.163	20.945	0.218	2.7	2702.87	0.043	0.343	0.3	4.7	0.909532	0.3	0.5	1105	566	1079	NA
126BC	F	Cre-	159	101	2376	Light	43755.5	2932.52	21.163	21.07	0.093	1.9	2534.16	0.041	0.216	0.175	3.3	0.864159	0.1	0.5	27	7	35	NA
126BC	F	Cre-	121	101	1692	Dark	43755	2923.43	21.163	21.03	0.133	1.4	2326.49	0.041	0.248	0.207	2.6	0.795808	0.2	0.5	14	0	51	NA
126BC	F	Cre-	211	101	3312	Dark	43756.1	2878.12	21.163	21.03	0.134	2.5	2530.24	0.041	0.239	0.198	4.4	0.879129	0.2	0.5	43	10	64	NA
126BC	F	Cre-	55	101	504	Dark	43754.2	2850.93	21.163	21.041	0.122	0.6	2441.47	0.047	0.252	0.205	1.2	0.856377	0.2	0.5	194	79	285	NA
126BC	F	Cre-	151	101	2232	Light	43755.4	2831.73	21.163	21.043	0.12	1.8	2475.55	0.041	0.212	0.171	3.2	0.874218	0.2	0.5	10	0	17	NA
126BC	F	Cre-	13	101	NA	NA	43753.6	2827.35	21.163	20.999	0.164	0.2	2371.27	0.041	0.311	0.27	0.3	0.838692	0.3	0.5	824	320	758	NA
126BC	F	Cre-	209	101	3276	Dark	43756.1	2821.27	21.163	21.012	0.151	2.5	2436.43	0.041	0.271	0.23	4.4	0.863595	0.2	0.5	103	30	97	NA
126BC	F	Cre-	220	101	3474	Dark	43756.2	2814.08	21.163	21.027	0.136	2.6	2476.29	0.041	0.256	0.215	4.6	0.879965	0.2	0.5	52	13	78	NA
126BC	F	Cre-	167	101	2520	Light	43755.6	2805.96	21.163	21.018	0.145	2	2273.34	0.041	0.275	0.233	3.5	0.81018	0.2	0.5	712	110	519	NA
126BC	F	Cre-	71	101	792	Light	43754.4	2804.86	21.163	21.047	0.116	0.8	2170	0.043	0.245	0.202	1.5	0.773656	0.2	0.5	47	11	30	NA
126BC	F	Cre-	143	101	2088	Dark	43755.3	2800.65	21.163	20.976	0.187	1.7	2427.45	0.041	0.279	0.238	3	0.866745	0.3	0.5	185	11	328	NA
126BC	F	Cre-	60	101	594	Dark	43754.2	2799.98	21.163	21.044	0.119	0.6	2389.4	0.047	0.248	0.2	1.3	0.853365	0.2	0.5	371	166	288	NA
126BC	F	Cre-	35	101	144	Dark	43753.9	2799.68	21.163	20.936	0.226	0.4	2293.96	0.047	0.365	0.318	0.8	0.819367	0.3	0.5	460	261	315	NA
126BC	F	Cre-	224	101	3546	Dark	43756.3	2795.85	21.163	21.02	0.143	2.7	2430.58	0.043	0.263	0.22	4.7	0.869352	0.2	0.5	56	4	66	NA
126BC	F	Cre-	204	101	3186	Dark	43756	2792.06	21.163	21.048	0.115	2.5	2416.29	0.041	0.207	0.166	4.3	0.865415	0.2	0.5	204	31	130	NA
126BC	F	Cre-	95	101	1224	Light	43754.7	2790.99	21.163	21.049	0.114	1.1	2324.72	0.042	0.217	0.175	2	0.832938	0.2	0.5	0	0	17	NA
126BC	F	Cre-	117	101	1620	Dark	43754.9	2788.71	21.163	20.988	0.175	1.4	2276.13	0.041	0.271	0.23	2.5	0.816195	0.3	0.5	984	566	1039	NA
126BC	F	Cre-	106	101	1422	Light	43754.8	2785.73	21.163	20.943	0.22	1.2	2249.07	0.041	0.343	0.302	2.2	0.807352	0.3	0.5	1073	456	939	NA
126BC	F	Cre-	205	101	3204	Dark	43756	2785.36	21.163	21.036	0.128	2.5	2117.26	0.041	0.216	0.175	4.3	0.760139	0.2	0.5	25	0	12	NA
126BC	F	Cre-	223	101	3528	Dark	43756.3	2780.48	21.163	21.048	0.115	2.7	2414.31	0.042	0.242	0.2	4.7	0.868308	0.2	0.5	36	6	87	NA
126BC	F	Cre-	112	101	1530	Dark	43754.9	2778.64	21.163	21.033	0.13	1.3	2295.64	0.041	0.245	0.204	2.3	0.826176	0.2	0.5	152	29	95	NA
126BC	F	Cre-	216	101	3402	Dark	43756.2	2778.06	21.163	21.011	0.152	2.6	2444.93	0.041	0.268	0.227	4.5	0.880085	0.2	0.5	439	175	463	NA
126BC	F	Cre-	196	101	3042	Dark	43755.9	2773.4	21.163	20.958	0.205	2.4	2222.59	0.041	0.315	0.275	4.1	0.801395	0.3	0.5	1528	872	1357	NA
126BC	F	Cre-	90	101	1134	Light	43754.6	2770.34	21.163	21.056	0.107	1	2371.63	0.043	0.231	0.188	1.9	0.856077	0.2	0.5	31	9	52	NA
126BC	F	Cre-	177	101	2700	Light	43755.7	2766.09	21.163	21.019	0.144	2.1	2385.31	0.041	0.271	0.23	3.7	0.862342	0.2	0.5	122	34	163	NA
126BC	F	Cre-	185	101	2844	Light	43755.8	2763.07	21.163	20.955	0.209	2.2	2143.82	0.041	0.335	0.294	3.9	0.775885	0.3	0.5	613	358	540	NA
126BC	F	Cre-	69	101	756	Light	43754.3	2760.72	21.163	20.96	0.203	0.8	2348.08	0.045	0.324	0.279	1.5	0.850532	0.3	0.5	1591	897	1176	NA
126BC	F	Cre-	21	101	NA	NA	43753.7	2754.89	21.163	21.076	0.087	0.2	2336.43	0.041	0.231	0.19	0.4	0.848101	0.1	0.5	146	40	272	NA
126BC	F	Cre-	235	101	3744	Light	43756.4	2754.32	21.162	21.05	0.112	2.8	2421.22	0.049	0.217	0.168	4.9	0.879064	0.2	0.5	17	1	57	NA
126BC	F	Cre-	178	101	2718	Light	43755.7	2752.78	21.163	21.043	0.12	2.1	2380.03	0.041	0.259	0.218	3.7	0.864591	0.2	0.5	41	13	55	NA
126BC	F	Cre-	54	101	486	Dark	43754.1	2752.74	21.163	20.971	0.192	0.6	2290.95	0.048	0.317	0.269	1.1	0.832244	0.3	0.5	1043	421	1022	NA
126BC	F	Cre-	227	101	3600	Light	43756.3	2748.31	21.163	21.011	0.152	2.7	2189.24	0.043	0.259	0.216	4.8	0.796578	0.2	0.5	119	25	357	NA
126BC	F	Cre-	127	101	1800	Dark	43755.1	2748.04	21.163	20.945	0.218	1.5	2428.41	0.041	0.333	0.292	2.7	0.883687	0.3	0.5	796	383	693	NA
126BC	F	Cre-	41	101	252	Dark	43754	2744.49	21.163	21.054	0.109	0.4	2405.18	0.047	0.244	0.197	0.9	0.876368	0.2	0.5	44	18	67	NA
126BC	F	Cre-	191	101	2952	Dark	43755.9	2744.25	21.163	21.013	0.151	2.3	2129.56	0.041	0.259	0.218	4	0.776006	0.2	0.5	200	32	218	NA
126BC	F	Cre-	99	101	1296	Light	43754.7	2742.93	21.163	20.954	0.21	1.1	2382	0.042	0.31	0.267	2.1	0.868413	0.3	0.5	1283	646	928	NA
126BC	F	Cre-	240	101	3834	Light	43756.5	2740.08	21.163	21.076	0.087	2.9	2451.62	0.041	0.203	0.162	5	0.894725	0.1	0.5	17	2	24	NA
126BC	F	Cre-	169	101	2556	Light	43755.6	2738.26	21.163	20.984	0.179	2	2585.03	0.041	0.31	0.269	3.5	0.944041	0.3	0.5	796	392	805	NA
126BC	F	Cre-	138	101	1998	Dark	43755.2	2737.23	21.163	20.955	0.208	1.6	2387.44	0.041	0.318	0.277	2.9	0.87221	0.3	0.5	258	56	196	NA
126BC	F	Cre-	176	101	2682	Light	43755.7	2734.03	21.163	21.042	0.122	2.1	2201.12	0.041	0.245	0.204	3.7	0.80508	0.2	0.5	157	15	196	NA
126BC	F	Cre-	30	101	54	Dark	43753.8	2732.91	21.163	20.963	0.2	0.3	2361.34	0.045	0.341	0.296	0.6	0.86404	0.3	0.5	258	67	462	NA
126BC	F	Cre-	84	101	1026	Light	43754.5	2724.75	21.163	21.056	0.107	0.9	2054.39	0.044	0.237	0.194	1.8	0.753973	0.2	0.5	201	39	199	NA
126BC	F	Cre-	70	101	774	Light	43754.3	2718.98	21.163	21.03	0.133	0.8	2182.11	0.045	0.254	0.209	1.5	0.802547	0.2	0.5	298	63	443	NA
126BC	F	Cre-	68	101	738	Light	43754.3	2718.68	21.163	20.935	0.228	0.7	2134.67	0.046	0.353	0.307	1.4	0.785189	0.4	0.5	1686	987	1382	NA
126BC	F	Cre-	91	101	1152	Light	43754.6	2718.64	21.163	20.959	0.204	1	2512.52	0.043	0.328	0.286	1.9	0.924183	0.3	0.5	176	38	394	NA
126BC	F	Cre-	36	101	162	Dark	43753.9	2716.81	21.163	21.035	0.127	0.4	2020.35	0.047	0.262	0.215	0.8	0.743648	0.2	0.5	674	191	702	NA
126BC	F	Cre-	52	101	450	Dark	43754.1	2716.51	21.163	21.062	0.101	0.6	2420.62	0.047	0.23	0.183	1.1	0.891077	0.2	0.5	26	7	18	NA
126BC	F	Cre-	236	101	3762	Light	43756.4	2716.24	21.162	20.974	0.189	2.8	2470.66	0.049	0.288	0.238	4.9	0.909587	0.3	0.5	758	395	539	NA
126BC	F	Cre-	192	101	2970	Dark	43755.9	2716.08	21.163	20.928	0.235	2.3	2285.99	0.041	0.364	0.323	4	0.84165	0.4	0.5	1613	1018	1320	NA
126BC	F	Cre-	42	101	270	Dark	43754	2715.62	21.163	21.046	0.117	0.4	2330.05	0.047	0.25	0.204	0.9	0.858018	0.2	0.5	37	12	44	NA
126BC	F	Cre-	50	101	414	Dark	43754.1	2708.82	21.163	21.048	0.115	0.5	2422.85	0.047	0.243	0.196	1.1	0.894431	0.2	0.5	73	12	58	NA
126BC	F	Cre-	98	101	1278	Light	43754.7	2704.6	21.163	21.032	0.131	1.1	2414.73	0.041	0.232	0.19	2	0.892821	0.2	0.5	107	47	56	NA
126BC	F	Cre-	139	101	2016	Dark	43755.2	2693.5	21.163	21.003	0.161	1.7	2339.46	0.041	0.271	0.23	2.9	0.868558	0.2	0.5	497	200	539	NA
126BC	F	Cre-	15	101	NA	NA	43753.7	2685.82	21.163	20.985	0.178	0.2	2408.19	0.041	0.317	0.276	0.3	0.896631	0.3	0.5	273	80	431	NA
126BC	F	Cre-	242	101	3870	Light	43756.5	2685.79	21.163	21.05	0.113	2.9	2290.5	0.041	0.254	0.213	5	0.852822	0.2	0.5	702	341	576	NA
126BC	F	Cre-	18	101	NA	NA	43753.7	2685.09	21.163	21.078	0.085	0.2	2358.06	0.041	0.224	0.184	0.4	0.878203	0.1	0.5	272	114	450	NA
126BC	F	Cre-	187	101	2880	Dark	43755.8	2681.83	21.163	20.965	0.198	2.2	2169.85	0.041	0.328	0.287	3.9	0.809093	0.3	0.5	1250	707	1168	NA
126BC	F	Cre-	97	101	1260	Light	43754.7	2680.57	21.163	21.041	0.122	1.1	2227.56	0.042	0.216	0.175	2	0.831005	0.2	0.5	14	8	15	NA
126BC	F	Cre-	134	101	1926	Dark	43755.1	2679.25	21.163	21.014	0.149	1.6	2645.81	0.041	0.263	0.222	2.8	0.987521	0.2	0.5	20	8	65	NA
126BC	F	Cre-	140	101	2034	Dark	43755.2	2677.37	21.163	21.036	0.127	1.7	2436.71	0.041	0.226	0.185	3	0.910115	0.2	0.5	217	84	211	NA
126BC	F	Cre-	94	101	1206	Light	43754.6	2676.86	21.163	21.038	0.125	1	2165.67	0.041	0.233	0.192	2	0.809035	0.2	0.5	352	56	385	NA
126BC	F	Cre-	150	101	2214	Light	43755.3	2674.12	21.163	21.029	0.134	1.8	2530.54	0.042	0.233	0.191	3.2	0.946308	0.2	0.5	300	45	329	NA
126BC	F	Cre-	237	101	3780	Light	43756.4	2674.07	21.162	21.045	0.117	2.8	2242.99	0.048	0.25	0.201	5	0.838795	0.2	0.5	666	194	591	NA
126BC	F	Cre-	246	101	3942	Light	43756.5	2671.86	21.162	21.04	0.121	2.9	2101.53	0.055	0.237	0.182	5.1	0.786542	0.2	0.5	147	23	175	NA
126BC	F	Cre-	28	101	18	Dark	43753.8	2670.84	21.163	21.063	0.1	0.3	1991.05	0.043	0.237	0.194	0.6	0.745474	0.2	0.5	28	2	31	NA
126BC	F	Cre-	89	101	1116	Light	43754.6	2669.92	21.163	21.058	0.105	1	2410.36	0.044	0.235	0.191	1.9	0.902783	0.2	0.5	241	77	277	NA
126BC	F	Cre-	96	101	1242	Light	43754.7	2669.34	21.163	21.037	0.126	1.1	2049.03	0.042	0.223	0.181	2	0.767615	0.2	0.5	39	6	57	NA
126BC	F	Cre-	120	101	1674	Dark	43755	2667.72	21.163	21.021	0.142	1.4	2229.91	0.041	0.255	0.214	2.5	0.835884	0.2	0.5	148	70	270	NA
126BC	F	Cre-	154	101	2286	Light	43755.4	2667.58	21.163	21.036	0.127	1.8	2686.97	0.041	0.259	0.218	3.2	1.00727	0.2	0.5	70	8	142	NA
126BC	F	Cre-	221	101	3492	Dark	43756.2	2667.07	21.163	20.969	0.194	2.7	2184.69	0.041	0.32	0.279	4.6	0.819135	0.3	0.5	288	35	431	NA
126BC	F	Cre-	2	101	NA	NA	43753.5	2666.98	21.163	20.964	0.199	0	2421.91	0.043	0.311	0.268	0	0.908109	0.3	0.5	1608	793	1115	NA
126BC	F	Cre-	153	101	2268	Light	43755.4	2658.2	21.163	21.008	0.155	1.8	2062.19	0.041	0.273	0.232	3.2	0.775782	0.2	0.5	67	5	263	NA
126BC	F	Cre-	198	101	3078	Dark	43755.9	2656.26	21.163	20.995	0.168	2.4	2333.47	0.041	0.272	0.231	4.2	0.878478	0.3	0.5	685	253	597	NA
126BC	F	Cre-	136	101	1962	Dark	43755.2	2655.7	21.143	20.982	0.161	1.6	2597.34	0.042	0.29	0.248	2.9	0.978023	0.2	0.5	345	58	169	NA
126BC	F	Cre-	77	101	900	Light	43754.4	2655.01	21.163	20.978	0.185	0.9	2401.73	0.045	0.324	0.278	1.6	0.904604	0.3	0.5	322	54	526	NA
126BC	F	Cre-	116	101	1602	Dark	43754.9	2653.07	21.163	20.944	0.219	1.3	2113.88	0.042	0.326	0.285	2.5	0.796768	0.3	0.5	1291	716	1000	NA
126BC	F	Cre-	31	101	72	Dark	43753.9	2652.99	21.163	20.941	0.222	0.3	2199.38	0.047	0.359	0.312	0.7	0.829019	0.3	0.5	721	437	685	NA
126BC	F	Cre-	226	101	3582	Dark	43756.3	2652.39	21.163	21.017	0.147	2.7	2185.96	0.042	0.265	0.224	4.8	0.824147	0.2	0.5	1063	441	896	NA
126BC	F	Cre-	165	101	2484	Light	43755.5	2651.4	21.163	21.051	0.112	2	2168.36	0.041	0.226	0.185	3.4	0.817817	0.2	0.5	4	1	20	NA
126BC	F	Cre-	33	101	108	Dark	43753.9	2650.77	21.163	21.051	0.112	0.4	2301.95	0.046	0.251	0.205	0.7	0.868409	0.2	0.5	529	195	770	NA
126BC	F	Cre-	25	101	NA	NA	43753.8	2647.23	21.163	21.08	0.083	0.3	2372.85	0.041	0.223	0.182	0.5	0.89635	0.1	0.5	113	40	169	NA
126BC	F	Cre-	81	101	972	Light	43754.5	2643.61	21.163	21.037	0.126	0.9	2221.91	0.045	0.256	0.212	1.7	0.840486	0.2	0.5	24	8	62	NA
126BC	F	Cre-	17	101	NA	NA	43753.7	2641.77	21.163	21.073	0.09	0.2	2149.48	0.042	0.231	0.189	0.4	0.813651	0.1	0.5	64	15	192	NA
126BC	F	Cre-	197	101	3060	Dark	43755.9	2639.59	21.163	20.984	0.179	2.4	2124.72	0.041	0.283	0.242	4.2	0.804944	0.3	0.5	1010	508	770	NA
126BC	F	Cre-	152	101	2250	Light	43755.4	2637.06	21.163	20.986	0.177	1.8	2308.17	0.041	0.287	0.246	3.2	0.875282	0.3	0.5	393	122	634	NA
126BC	F	Cre-	126	101	1782	Dark	43755	2632.86	21.163	21.031	0.132	1.5	2300.68	0.041	0.229	0.188	2.7	0.873832	0.2	0.5	22	5	19	NA
126BC	F	Cre-	125	101	1764	Dark	43755	2629.02	21.163	21.038	0.125	1.5	2217.57	0.041	0.235	0.195	2.7	0.843497	0.2	0.5	108	26	25	NA
126BC	F	Cre-	104	101	1386	Light	43754.8	2628.33	21.163	21.038	0.125	1.2	2259.38	0.041	0.247	0.206	2.2	0.859628	0.2	0.5	22	8	73	NA
126BC	F	Cre-	160	101	2394	Light	43755.5	2624.77	21.163	20.967	0.196	1.9	2393.69	0.041	0.314	0.273	3.4	0.911963	0.3	0.5	309	109	312	NA
126BC	F	Cre-	199	101	3096	Dark	43756	2620.82	21.163	21.033	0.13	2.4	2065.38	0.041	0.229	0.188	4.2	0.788066	0.2	0.5	59	12	88	NA
126BC	F	Cre-	173	101	2628	Light	43755.6	2619.81	21.163	20.979	0.184	2	2431.91	0.041	0.313	0.273	3.6	0.928275	0.3	0.5	679	256	822	NA
126BC	F	Cre-	101	101	1332	Light	43754.7	2618.72	21.163	20.984	0.179	1.1	2447.28	0.041	0.304	0.262	2.1	0.934531	0.3	0.5	860	376	623	NA
126BC	F	Cre-	129	101	1836	Dark	43755.1	2618.63	21.163	21.028	0.135	1.5	2248.86	0.041	0.235	0.193	2.7	0.858793	0.2	0.5	90	10	99	NA
126BC	F	Cre-	184	101	2826	Light	43755.8	2616.97	21.163	21.044	0.119	2.2	2237.37	0.041	0.24	0.199	3.9	0.854948	0.2	0.5	177	36	154	NA
126BC	F	Cre-	122	101	1710	Dark	43755	2616.08	21.163	21.042	0.121	1.4	2167.37	0.041	0.236	0.195	2.6	0.828482	0.2	0.5	6	0	49	NA
126BC	F	Cre-	218	101	3438	Dark	43756.2	2615.72	21.163	20.971	0.192	2.6	2650.68	0.042	0.31	0.268	4.6	1.01337	0.3	0.5	306	143	302	NA
126BC	F	Cre-	34	101	126	Dark	43753.9	2615.41	21.163	21.052	0.11	0.4	2383.18	0.046	0.247	0.201	0.7	0.911204	0.2	0.5	27	3	21	NA
126BC	F	Cre-	100	101	1314	Light	43754.7	2615.06	21.163	20.976	0.187	1.1	2198.31	0.041	0.3	0.258	2.1	0.840635	0.3	0.5	630	293	739	NA
126BC	F	Cre-	27	101	0	Dark	43753.8	2614.05	21.163	21.06	0.103	0.3	2391.51	0.041	0.241	0.2	0.6	0.914868	0.2	0.5	299	54	625	NA
126BC	F	Cre-	157	101	2340	Light	43755.4	2613.25	21.163	21.045	0.118	1.9	2479.95	0.041	0.245	0.204	3.3	0.94899	0.2	0.5	387	90	416	NA
126BC	F	Cre-	144	101	2106	Dark	43755.3	2612.98	21.163	21.017	0.146	1.7	2486.65	0.041	0.241	0.2	3	0.951654	0.2	0.5	360	131	585	NA
126BC	F	Cre-	61	101	612	Dark	43754.2	2611.13	21.163	21.045	0.117	0.6	2323.18	0.047	0.25	0.204	1.3	0.88972	0.2	0.5	132	32	152	NA
126BC	F	Cre-	195	101	3024	Dark	43755.9	2610.24	21.163	20.945	0.218	2.3	2280.27	0.041	0.329	0.288	4.1	0.873586	0.3	0.5	2209	1402	1579	NA
126BC	F	Cre-	45	101	324	Dark	43754	2609.77	21.163	21.044	0.119	0.5	2242.97	0.047	0.249	0.202	0.9	0.859452	0.2	0.5	53	5	69	NA
126BC	F	Cre-	4	101	NA	NA	43753.5	2608.28	21.163	20.977	0.186	0	2529.86	0.042	0.323	0.281	0.1	0.969933	0.3	0.5	1257	564	1091	NA
126BC	F	Cre-	203	101	3168	Dark	43756	2605.2	21.163	21.035	0.128	2.4	2346.83	0.041	0.223	0.181	4.3	0.900827	0.2	0.5	518	130	584	NA
126BC	F	Cre-	245	101	3924	Light	43756.5	2605.02	21.163	20.998	0.165	2.9	2464.58	0.041	0.287	0.246	5.1	0.94609	0.3	0.5	1296	720	1068	NA
126BC	F	Cre-	57	101	540	Dark	43754.2	2605.01	21.163	21.034	0.128	0.6	2424.79	0.047	0.258	0.21	1.2	0.930816	0.2	0.5	26	5	68	NA
126BC	F	Cre-	238	101	3798	Light	43756.4	2604.9	21.163	21.065	0.098	2.9	2426.77	0.041	0.219	0.177	5	0.931616	0.2	0.5	47	8	74	NA
126BC	F	Cre-	170	101	2574	Light	43755.6	2603.16	21.163	21.031	0.132	2	2195.94	0.042	0.247	0.205	3.6	0.84357	0.2	0.5	240	85	515	NA
126BC	F	Cre-	93	101	1188	Light	43754.6	2603.12	21.163	20.983	0.18	1	2207.74	0.042	0.29	0.248	2	0.848114	0.3	0.5	737	307	927	NA
126BC	F	Cre-	83	101	1008	Light	43754.5	2601.79	21.163	20.971	0.192	0.9	2345.61	0.044	0.323	0.279	1.8	0.901537	0.3	0.5	831	279	884	NA
126BC	F	Cre-	39	101	216	Dark	43754	2601.1	21.163	21.047	0.115	0.4	2369.5	0.046	0.249	0.203	0.8	0.91096	0.2	0.5	14	3	34	NA
126BC	F	Cre-	32	101	90	Dark	43753.9	2600.39	21.163	20.965	0.198	0.3	2008.59	0.047	0.335	0.288	0.7	0.772419	0.3	0.5	472	192	542	NA
126BC	F	Cre-	214	101	3366	Dark	43756.1	2599.91	21.163	21.036	0.127	2.6	2079.48	0.041	0.235	0.194	4.5	0.799826	0.2	0.5	5	2	26	NA
126BC	F	Cre-	230	101	3654	Light	43756.3	2596.6	21.163	21.034	0.129	2.8	2416.82	0.043	0.241	0.198	4.8	0.930766	0.2	0.5	72	4	215	NA
126BC	F	Cre-	164	101	2466	Light	43755.5	2594.84	21.163	21.039	0.124	1.9	1950.15	0.041	0.239	0.198	3.4	0.751549	0.2	0.5	56	5	143	NA
126BC	F	Cre-	78	101	918	Light	43754.4	2593.32	21.163	21.032	0.131	0.9	2179.11	0.044	0.266	0.222	1.7	0.840278	0.2	0.5	327	17	394	NA
126BC	F	Cre-	210	101	3294	Dark	43756.1	2592.81	21.163	21.024	0.139	2.5	2025.98	0.041	0.253	0.212	4.4	0.781382	0.2	0.5	18	3	24	NA
126BC	F	Cre-	213	101	3348	Dark	43756.1	2590.92	21.163	21.032	0.131	2.6	2308.44	0.041	0.249	0.208	4.5	0.890971	0.2	0.5	658	256	752	NA
126BC	F	Cre-	114	101	1566	Dark	43754.9	2586.01	21.163	20.937	0.227	1.3	2443.4	0.041	0.345	0.304	2.4	0.944853	0.3	0.5	1707	1112	1377	NA
126BC	F	Cre-	124	101	1746	Dark	43755	2585.85	21.163	20.962	0.201	1.4	2404.1	0.041	0.318	0.278	2.6	0.929716	0.3	0.5	1040	441	949	NA
126BC	F	Cre-	202	101	3150	Dark	43756	2585.58	21.163	20.971	0.193	2.4	2318.56	0.041	0.278	0.237	4.3	0.896727	0.3	0.5	1603	997	1252	NA
126BC	F	Cre-	74	101	846	Light	43754.4	2585.42	21.163	20.947	0.216	0.8	2451.18	0.044	0.341	0.297	1.6	0.948081	0.3	0.5	864	405	727	NA
126BC	F	Cre-	171	101	2592	Light	43755.6	2583.74	21.163	21.043	0.12	2	2317.59	0.041	0.228	0.187	3.6	0.896992	0.2	0.5	44	2	48	NA
126BC	F	Cre-	51	101	432	Dark	43754.1	2582.16	21.163	21.048	0.114	0.5	2376.65	0.048	0.244	0.196	1.1	0.920414	0.2	0.5	26	4	44	NA
126BC	F	Cre-	158	101	2358	Light	43755.4	2579.02	21.163	21.033	0.13	1.9	2213.97	0.041	0.246	0.205	3.3	0.858452	0.2	0.5	27	0	65	NA
126BC	F	Cre-	130	101	1854	Dark	43755.1	2578.95	21.163	20.931	0.232	1.5	2367.5	0.041	0.331	0.29	2.8	0.918008	0.4	0.5	332	157	368	NA
126BC	F	Cre-	149	101	2196	Light	43755.3	2578.94	21.163	20.984	0.179	1.8	2185.3	0.042	0.277	0.235	3.1	0.847363	0.3	0.5	971	447	752	NA
126BC	F	Cre-	123	101	1728	Dark	43755	2578.31	21.163	20.946	0.217	1.4	2232.16	0.041	0.324	0.283	2.6	0.865744	0.3	0.5	272	85	259	NA
126BC	F	Cre-	92	101	1170	Light	43754.6	2578.21	21.163	20.96	0.203	1	2092.28	0.042	0.31	0.268	1.9	0.811522	0.3	0.5	1066	540	1009	NA
126BC	F	Cre-	102	101	1350	Light	43754.7	2578.04	21.163	20.986	0.177	1.1	2328.79	0.041	0.296	0.255	2.1	0.903319	0.3	0.5	423	117	673	NA
126BC	F	Cre-	156	101	2322	Light	43755.4	2576.22	21.163	21.06	0.104	1.9	2322.84	0.041	0.233	0.192	3.3	0.901646	0.2	0.5	18	6	73	NA
126BC	F	Cre-	80	101	954	Light	43754.5	2575.79	21.163	21.04	0.123	0.9	2344.22	0.044	0.255	0.21	1.7	0.910097	0.2	0.5	13	5	31	NA
126BC	F	Cre-	22	101	NA	NA	43753.7	2574.92	21.163	21.067	0.096	0.2	2094.93	0.041	0.237	0.196	0.5	0.813592	0.2	0.5	2	1	27	NA
126BC	F	Cre-	19	101	NA	NA	43753.7	2574.86	21.163	21.067	0.096	0.2	2345.92	0.041	0.236	0.195	0.4	0.911085	0.2	0.5	5	0	39	NA
126BC	F	Cre-	188	101	2898	Dark	43755.8	2574.39	21.163	20.995	0.168	2.2	2352.17	0.041	0.297	0.256	4	0.91368	0.3	0.5	622	165	746	NA
126BC	F	Cre-	29	101	36	Dark	43753.8	2572.95	21.163	21.058	0.105	0.3	2052.66	0.044	0.243	0.199	0.6	0.797785	0.2	0.5	43	6	58	NA
126BC	F	Cre-	20	101	NA	NA	43753.7	2569.86	21.163	21.013	0.15	0.2	2367.43	0.041	0.287	0.246	0.4	0.921227	0.2	0.5	362	136	573	NA
126BC	F	Cre-	56	101	522	Dark	43754.2	2569.44	21.163	21.042	0.121	0.6	1963.57	0.048	0.249	0.202	1.2	0.764204	0.2	0.5	414	97	583	NA
126BC	F	Cre-	48	101	378	Dark	43754.1	2566.99	21.163	20.949	0.213	0.5	2457.24	0.047	0.344	0.297	1	0.957248	0.3	0.5	1474	829	1155	NA
126BC	F	Cre-	79	101	936	Light	43754.5	2565	21.163	21.024	0.139	0.9	2308.33	0.044	0.262	0.218	1.7	0.899934	0.2	0.5	17	3	12	NA
126BC	F	Cre-	6	101	NA	NA	43753.5	2563.67	21.163	21.002	0.161	0.1	2139.48	0.041	0.31	0.269	0.1	0.834537	0.3	0.5	561	214	820	NA
126BC	F	Cre-	16	101	NA	NA	43753.7	2561.97	21.163	21.009	0.153	0.2	2279.91	0.045	0.29	0.245	0.4	0.889905	0.2	0.5	273	40	505	NA
126BC	F	Cre-	166	101	2502	Light	43755.5	2561.73	21.163	20.964	0.199	2	2345.53	0.041	0.326	0.285	3.5	0.915607	0.3	0.5	532	254	572	NA
126BC	F	Cre-	26	101	NA	NA	43753.8	2561.1	21.163	20.94	0.223	0.3	2239.26	0.041	0.362	0.321	0.6	0.874336	0.3	0.5	338	136	493	NA
126BC	F	Cre-	241	101	3852	Light	43756.5	2559.93	21.163	21.008	0.155	2.9	2403.26	0.042	0.269	0.227	5	0.938799	0.2	0.5	201	116	170	NA
126BC	F	Cre-	105	101	1404	Light	43754.8	2559.01	21.163	21.037	0.126	1.2	2344.01	0.041	0.242	0.2	2.2	0.915985	0.2	0.5	28	5	36	NA
126BC	F	Cre-	208	101	3258	Dark	43756.1	2558.34	21.163	20.984	0.179	2.5	2368.17	0.041	0.287	0.246	4.4	0.925669	0.3	0.5	332	121	355	NA
126BC	F	Cre-	9	101	NA	NA	43753.6	2557.48	21.163	21.05	0.113	0.1	2482.75	0.042	0.253	0.211	0.2	0.970782	0.2	0.5	801	224	689	NA
126BC	F	Cre-	40	101	234	Dark	43754	2557.01	21.163	21.044	0.118	0.4	2208.72	0.046	0.253	0.207	0.8	0.86379	0.2	0.5	125	52	106	NA
126BC	F	Cre-	113	101	1548	Dark	43754.9	2556.97	21.163	20.94	0.223	1.3	2328.99	0.041	0.333	0.293	2.4	0.91084	0.3	0.5	443	234	315	NA
126BC	F	Cre-	53	101	468	Dark	43754.1	2556.45	21.163	20.936	0.226	0.6	2378.42	0.048	0.352	0.305	1.1	0.930364	0.3	0.5	609	343	541	NA
126BC	F	Cre-	215	101	3384	Dark	43756.2	2555.36	21.163	20.971	0.192	2.6	2206.82	0.041	0.31	0.269	4.5	0.863603	0.3	0.5	559	227	474	NA
126BC	F	Cre-	110	101	1494	Dark	43754.8	2554.98	21.163	21.023	0.14	1.2	2252.82	0.041	0.263	0.222	2.3	0.881735	0.2	0.5	120	24	149	NA
126BC	F	Cre-	168	101	2538	Light	43755.6	2554.31	21.163	20.991	0.172	2	2174.56	0.041	0.298	0.256	3.5	0.851329	0.3	0.5	185	58	306	NA
126BC	F	Cre-	186	101	2862	Light	43755.8	2553.78	21.163	20.955	0.208	2.2	2445.97	0.041	0.352	0.311	3.9	0.957782	0.3	0.5	1647	928	1440	NA
126BC	F	Cre-	244	101	3906	Light	43756.5	2552.9	21.163	20.981	0.182	2.9	2214.76	0.042	0.309	0.266	5.1	0.867546	0.3	0.5	749	367	460	NA
126BC	F	Cre-	82	101	990	Light	43754.5	2549.9	21.163	21.068	0.094	0.9	2032.66	0.045	0.226	0.181	1.7	0.797153	0.1	0.5	0	0	17	NA
126BC	F	Cre-	46	101	342	Dark	43754	2548.26	21.163	20.952	0.211	0.5	2205.21	0.047	0.342	0.295	1	0.865381	0.3	0.5	535	150	670	NA
126BC	F	Cre-	115	101	1584	Dark	43754.9	2544.4	21.163	20.94	0.223	1.3	2157.54	0.042	0.335	0.294	2.4	0.847956	0.3	0.5	2407	1671	1729	NA
126BC	F	Cre-	108	101	1458	Dark	43754.8	2539.84	21.163	20.967	0.196	1.2	2226.73	0.041	0.324	0.282	2.3	0.876719	0.3	0.5	844	321	842	NA
126BC	F	Cre-	59	101	576	Dark	43754.2	2536.17	21.163	21.041	0.122	0.6	2130.99	0.048	0.248	0.201	1.2	0.840242	0.2	0.5	145	39	181	NA
126BC	F	Cre-	119	101	1656	Dark	43755	2532.03	21.163	20.973	0.19	1.4	2010.92	0.041	0.309	0.267	2.5	0.794193	0.3	0.5	741	103	428	NA
126BC	F	Cre-	86	101	1062	Light	43754.5	2525.78	21.163	21.043	0.12	0.9	2369.14	0.044	0.248	0.204	1.8	0.937983	0.2	0.5	12	4	34	NA
126BC	F	Cre-	10	101	NA	NA	43753.6	2524.33	21.163	20.989	0.175	0.1	2198.81	0.041	0.312	0.27	0.2	0.871049	0.3	0.5	452	235	913	NA
126BC	F	Cre-	3	101	NA	NA	43753.5	2519.88	21.163	20.973	0.19	0	2535.11	0.042	0.312	0.27	0	1.00604	0.3	0.5	1373	542	1143	NA
126BC	F	Cre-	109	101	1476	Dark	43754.8	2518.15	21.163	21.03	0.134	1.2	2183.99	0.041	0.257	0.216	2.3	0.867299	0.2	0.5	144	26	134	NA
126BC	F	Cre-	85	101	1044	Light	43754.5	2517.69	21.163	21.038	0.125	0.9	2248.07	0.044	0.254	0.21	1.8	0.89291	0.2	0.5	54	19	48	NA
126BC	F	Cre-	231	101	3672	Light	43756.4	2517.16	21.163	21.035	0.128	2.8	2326.46	0.042	0.234	0.192	4.9	0.924242	0.2	0.5	143	26	165	NA
126BC	F	Cre-	250	101	4014	Light	43756.6	2516.74	21.163	20.972	0.191	3	2302.36	0.041	0.311	0.27	5.2	0.914817	0.3	0.5	763	363	607	NA
126BC	F	Cre-	179	101	2736	Light	43755.7	2515.42	21.163	21.033	0.13	2.1	1912.83	0.041	0.25	0.209	3.7	0.760442	0.2	0.5	33	12	77	NA
126BC	F	Cre-	58	101	558	Dark	43754.2	2515.22	21.163	21.076	0.086	0.6	2247.83	0.047	0.211	0.164	1.2	0.89369	0.1	0.5	7	1	144	NA
126BC	F	Cre-	49	101	396	Dark	43754.1	2514.12	21.163	21.054	0.108	0.5	2555.06	0.047	0.242	0.195	1	1.01628	0.2	0.5	412	130	548	NA
126BC	F	Cre-	128	101	1818	Dark	43755.1	2510.31	21.163	20.962	0.201	1.5	2332.42	0.041	0.309	0.268	2.7	0.929136	0.3	0.5	586	207	792	NA
126BC	F	Cre-	67	101	720	Light	43754.3	2508.78	21.163	20.929	0.234	0.7	2278.24	0.046	0.362	0.316	1.4	0.908108	0.4	0.5	1100	587	903	NA
126BC	F	Cre-	247	101	3960	Light	43756.6	2508.7	21.162	21.05	0.111	2.9	2324.37	0.055	0.225	0.17	5.1	0.92652	0.2	0.5	28	8	27	NA
126BC	F	Cre-	38	101	198	Dark	43753.9	2506.15	21.163	21.06	0.103	0.4	2176.47	0.048	0.237	0.189	0.8	0.868452	0.2	0.5	99	24	166	NA
126BC	F	Cre-	163	101	2448	Light	43755.5	2505.5	21.163	20.998	0.165	1.9	2156.29	0.041	0.289	0.249	3.4	0.860622	0.3	0.5	173	34	575	NA
126BC	F	Cre-	147	101	2160	Light	43755.3	2502.38	21.163	20.945	0.218	1.8	2275.78	0.041	0.319	0.278	3.1	0.909448	0.3	0.5	1532	881	1093	NA
126BC	F	Cre-	145	101	2124	Dark	43755.3	2501.84	21.163	21.048	0.115	1.7	2314.52	0.041	0.205	0.164	3.1	0.925126	0.2	0.5	57	8	180	NA
126BC	F	Cre-	14	101	NA	NA	43753.6	2500.54	21.163	21.013	0.15	0.2	2495.52	0.041	0.288	0.247	0.3	0.997992	0.2	0.5	388	114	833	NA
126BC	F	Cre-	172	101	2610	Light	43755.6	2496.23	21.163	21.052	0.111	2	2300.53	0.041	0.218	0.177	3.6	0.921602	0.2	0.5	73	11	73	NA
126BC	F	Cre-	135	101	1944	Dark	43755.2	2495.72	21.163	21.021	0.142	1.6	2283.73	0.041	0.255	0.214	2.9	0.915059	0.2	0.5	20	9	40	NA
126BC	F	Cre-	180	101	2754	Light	43755.7	2493.08	21.163	20.964	0.199	2.1	2374.3	0.041	0.336	0.295	3.8	0.952358	0.3	0.5	269	95	394	NA
126BC	F	Cre-	118	101	1638	Dark	43754.9	2493.03	21.163	20.953	0.21	1.4	2352.39	0.041	0.331	0.29	2.5	0.943588	0.3	0.5	1378	777	1063	NA
126BC	F	Cre-	219	101	3456	Dark	43756.2	2491.43	21.163	21.034	0.129	2.6	2383.05	0.042	0.26	0.218	4.6	0.956499	0.2	0.5	202	50	131	NA
126BC	F	Cre-	233	101	3708	Light	43756.4	2490.38	21.163	21.071	0.092	2.8	2469.89	0.041	0.2	0.159	4.9	0.991772	0.1	0.5	367	195	447	NA
126BC	F	Cre-	12	101	NA	NA	43753.6	2481.69	21.163	21.006	0.158	0.1	2213.94	0.041	0.292	0.251	0.3	0.892108	0.2	0.5	239	101	590	NA
126BC	F	Cre-	43	101	288	Dark	43754	2480.99	21.163	21.006	0.157	0.5	1959.45	0.047	0.291	0.244	0.9	0.789786	0.2	0.5	449	96	583	NA
126BC	F	Cre-	189	101	2916	Dark	43755.8	2479.46	21.163	21.045	0.118	2.2	2057.18	0.041	0.239	0.198	4	0.829689	0.2	0.5	32	3	34	NA
126BC	F	Cre-	181	101	2772	Light	43755.7	2477.75	21.163	20.95	0.213	2.1	2129.81	0.041	0.337	0.296	3.8	0.859574	0.3	0.5	1431	829	1329	NA
126BC	F	Cre-	162	101	2430	Light	43755.5	2476.79	21.163	21.004	0.16	1.9	2130.77	0.041	0.264	0.223	3.4	0.860295	0.2	0.5	507	211	512	NA
126BC	F	Cre-	66	101	702	Dark	43754.3	2476.47	21.163	20.923	0.24	0.7	2263.4	0.045	0.367	0.322	1.4	0.913963	0.4	0.5	696	292	524	NA
126BC	F	Cre-	1	101	NA	NA	43753.5	2474.52	21.162	20.935	0.227	0	2386.47	0.049	0.336	0.287	0	0.964421	0.3	0.5	225	141	143	NA
126BC	F	Cre-	212	101	3330	Dark	43756.1	2464.73	21.163	20.992	0.171	2.6	2391.09	0.04	0.296	0.255	4.5	0.970121	0.3	0.5	306	126	610	NA
126BC	F	Cre-	161	101	2412	Light	43755.5	2458.28	21.163	21.054	0.109	1.9	1986.3	0.041	0.234	0.193	3.4	0.808006	0.2	0.5	398	173	426	NA
126BC	F	Cre-	141	101	2052	Dark	43755.2	2457.58	21.163	21.046	0.117	1.7	2043.79	0.041	0.214	0.173	3	0.831625	0.2	0.5	56	8	62	NA
126BC	F	Cre-	232	101	3690	Light	43756.4	2451.93	21.163	21.02	0.143	2.8	2047.78	0.042	0.251	0.21	4.9	0.835169	0.2	0.5	661	248	585	NA
126BC	F	Cre-	47	101	360	Dark	43754.1	2449.95	21.163	20.934	0.228	0.5	2290.09	0.047	0.366	0.319	1	0.934749	0.4	0.5	867	320	718	NA
126BC	F	Cre-	75	101	864	Light	43754.4	2449.1	21.163	20.978	0.184	0.8	2155.73	0.045	0.312	0.267	1.6	0.880212	0.3	0.5	308	109	297	NA
126BC	F	Cre-	7	101	NA	NA	43753.6	2447.55	21.163	20.998	0.165	0.1	2519.97	0.041	0.306	0.265	0.1	1.02959	0.3	0.5	949	426	982	NA
126BC	F	Cre-	62	101	630	Dark	43754.2	2446.54	21.163	20.978	0.185	0.7	2389.35	0.048	0.318	0.27	1.3	0.976622	0.3	0.5	217	51	249	NA
126BC	F	Cre-	73	101	828	Light	43754.4	2442.8	21.163	21.043	0.12	0.8	2241.76	0.044	0.247	0.204	1.5	0.9177	0.2	0.5	12	2	56	NA
126BC	F	Cre-	206	101	3222	Dark	43756	2440.74	21.163	20.956	0.207	2.5	2065.03	0.041	0.302	0.261	4.3	0.846069	0.3	0.5	529	244	469	NA
126BC	F	Cre-	64	101	666	Dark	43754.3	2439.28	21.163	21.037	0.126	0.7	2458.54	0.046	0.253	0.206	1.3	1.0079	0.2	0.5	15	3	57	NA
126BC	F	Cre-	201	101	3132	Dark	43756	2437.99	21.163	21.023	0.14	2.4	1853.34	0.041	0.23	0.189	4.2	0.760193	0.2	0.5	124	54	111	NA
126BC	F	Cre-	222	101	3510	Dark	43756.2	2435.07	21.163	21.023	0.14	2.7	2018.62	0.041	0.275	0.234	4.7	0.82898	0.2	0.5	209	88	292	NA
126BC	F	Cre-	207	101	3240	Dark	43756.1	2434.59	21.163	21.043	0.121	2.5	2165.66	0.041	0.229	0.188	4.4	0.88954	0.2	0.5	370	179	523	NA
126BC	F	Cre-	8	101	NA	NA	43753.6	2433.92	21.163	21.026	0.137	0.1	2454.84	0.042	0.283	0.24	0.2	1.00859	0.2	0.5	618	265	526	NA
126BC	F	Cre-	155	101	2304	Light	43755.4	2432.39	21.163	21.043	0.12	1.9	2289.17	0.041	0.257	0.216	3.3	0.941118	0.2	0.5	6	0	49	NA
126BC	F	Cre-	183	101	2808	Light	43755.8	2431.83	21.163	20.987	0.177	2.2	2203.58	0.041	0.299	0.258	3.8	0.906139	0.3	0.5	666	270	689	NA
126BC	F	Cre-	248	101	3978	Light	43756.6	2431.21	21.163	21.058	0.105	2.9	2017.7	0.043	0.222	0.18	5.2	0.829916	0.2	0.5	122	57	158	NA
126BC	F	Cre-	190	101	2934	Dark	43755.8	2429.98	21.163	21.015	0.148	2.3	2201.49	0.041	0.266	0.225	4	0.905968	0.2	0.5	698	229	806	NA
126BC	F	Cre-	63	101	648	Dark	43754.3	2429.19	21.163	21.039	0.124	0.7	2172.5	0.047	0.252	0.205	1.3	0.894333	0.2	0.5	552	111	675	NA
126BC	F	Cre-	65	101	684	Dark	43754.3	2427.58	21.163	21.029	0.133	0.7	2095.19	0.047	0.256	0.21	1.4	0.863077	0.2	0.5	19	5	38	NA
126BC	F	Cre-	111	101	1512	Dark	43754.9	2425.08	21.163	20.963	0.2	1.3	2377.31	0.041	0.318	0.277	2.3	0.9803	0.3	0.5	1034	393	969	NA
126BC	F	Cre-	249	101	3996	Light	43756.6	2419.29	21.163	21.06	0.103	3	2349.56	0.041	0.218	0.177	5.2	0.97118	0.2	0.5	60	15	71	NA
126BC	F	Cre-	23	101	NA	NA	43753.8	2416.87	21.163	21.011	0.152	0.2	2223.7	0.041	0.293	0.252	0.5	0.920075	0.2	0.5	639	128	727	NA
126BC	F	Cre-	142	101	2070	Dark	43755.2	2416.02	21.163	21.031	0.132	1.7	2378.52	0.041	0.227	0.186	3	0.984477	0.2	0.5	53	22	24	NA
126BC	F	Cre-	72	101	810	Light	43754.4	2413.75	21.163	21.056	0.107	0.8	2144.96	0.043	0.232	0.189	1.5	0.888645	0.2	0.5	31	8	40	NA
126BC	F	Cre-	239	101	3816	Light	43756.5	2413.11	21.163	21.028	0.135	2.9	2386.73	0.041	0.251	0.21	5	0.989068	0.2	0.5	379	101	534	NA
126BC	F	Cre-	5	101	NA	NA	43753.5	2410.74	21.163	20.993	0.17	0.1	2364.56	0.042	0.309	0.268	0.1	0.980846	0.3	0.5	1072	448	865	NA
126BC	F	Cre-	175	101	2664	Light	43755.7	2409.28	21.163	20.985	0.178	2.1	1883.78	0.041	0.317	0.276	3.7	0.781885	0.3	0.5	395	66	476	NA
126BC	F	Cre-	228	101	3618	Light	43756.3	2405.97	21.163	20.957	0.206	2.7	2243.25	0.043	0.316	0.274	4.8	0.932369	0.3	0.5	349	167	397	NA
126BC	F	Cre-	44	101	306	Dark	43754	2399.57	21.163	21.046	0.117	0.5	2317.3	0.047	0.248	0.201	0.9	0.965715	0.2	0.5	102	49	125	NA
126BC	F	Cre-	87	101	1080	Light	43754.6	2397.02	21.163	21.052	0.11	1	2262.03	0.044	0.234	0.19	1.8	0.943686	0.2	0.5	16	4	86	NA
126BC	F	Cre-	24	101	NA	NA	43753.8	2396.89	21.163	20.975	0.188	0.3	2270.57	0.041	0.331	0.29	0.5	0.947297	0.3	0.5	603	186	613	NA
126BC	F	Cre-	76	101	882	Light	43754.4	2394.02	21.163	20.989	0.174	0.8	2368.12	0.047	0.309	0.262	1.6	0.989181	0.3	0.5	579	295	440	NA
126BC	F	Cre-	37	101	180	Dark	43753.9	2390.28	21.153	21.034	0.119	0.4	2226.81	0.048	0.265	0.216	0.8	0.931614	0.2	0.5	313	73	425	NA
126BC	F	Cre-	193	101	2988	Dark	43755.9	2383.53	21.163	20.955	0.208	2.3	2237.47	0.041	0.333	0.292	4.1	0.938723	0.3	0.5	1728	1065	1356	NA
126BC	F	Cre-	229	101	3636	Light	43756.3	2380.49	21.163	20.991	0.172	2.8	2021.01	0.043	0.297	0.254	4.8	0.848989	0.3	0.5	1210	642	968	NA
126BC	F	Cre-	133	101	1908	Dark	43755.1	2379.06	21.163	21.027	0.137	1.6	2255.87	0.041	0.255	0.214	2.8	0.94822	0.2	0.5	495	160	377	NA
126BC	F	Cre-	103	101	1368	Light	43754.8	2377.6	21.163	21.026	0.137	1.2	2283.48	0.041	0.262	0.221	2.2	0.960415	0.2	0.5	79	21	118	NA
126BC	F	Cre-	200	101	3114	Dark	43756	2354.12	21.163	21.017	0.146	2.4	2068.77	0.041	0.237	0.196	4.2	0.878784	0.2	0.5	35	7	41	NA
126BC	F	Cre-	234	101	3726	Light	43756.4	2341.76	21.163	21.044	0.118	2.8	2146.46	0.048	0.22	0.172	4.9	0.916603	0.2	0.5	110	47	60	NA
126BC	F	Cre-	88	101	1098	Light	43754.6	2335.01	21.163	20.958	0.205	1	1942.18	0.043	0.322	0.279	1.8	0.831766	0.3	0.5	836	305	884	NA
126BC	F	Cre-	11	101	NA	NA	43753.6	2328.79	21.163	21.012	0.152	0.1	2128.21	0.041	0.298	0.256	0.2	0.913868	0.2	0.5	216	43	465	NA
126BC	F	Cre-	146	101	2142	Dark	43755.3	2316.27	21.163	20.952	0.211	1.7	2316.51	0.041	0.288	0.247	3.1	1.0001	0.3	0.5	227	96	318	NA
126BC	F	Cre-	148	101	2178	Light	43755.3	2314.61	21.163	20.956	0.207	1.8	2167.3	0.042	0.293	0.251	3.1	0.936356	0.3	0.5	2007	1302	1533	NA
126BC	F	Cre-	107	101	1440	Dark	43754.8	2304.01	21.163	20.969	0.194	1.2	2021.87	0.041	0.309	0.267	2.2	0.877544	0.3	0.5	1104	507	962	NA
126BC	F	Cre-	132	101	1890	Dark	43755.1	2296.14	21.163	20.966	0.197	1.6	2222.18	0.041	0.309	0.268	2.8	0.967788	0.3	0.5	1283	744	1096	NA
126BC	F	Cre-	131	101	1872	Dark	43755.1	2281.47	21.163	20.993	0.17	1.5	2071.9	0.041	0.281	0.24	2.8	0.908143	0.3	0.5	660	205	576	NA
126BC	F	Cre-	194	101	3006	Dark	43755.9	2272.58	21.163	20.946	0.218	2.3	2185.72	0.041	0.331	0.29	4.1	0.961777	0.3	0.5	1954	1235	1633	NA
126BC	F	Cre-	174	101	2646	Light	43755.6	2267.17	21.163	21.042	0.121	2.1	2058.41	0.041	0.246	0.206	3.6	0.907919	0.2	0.5	99	2	79	NA
126BC	F	Cre-	217	101	3420	Dark	43756.2	2251.92	21.163	21.032	0.131	2.6	1870.42	0.041	0.241	0.199	4.6	0.83059	0.2	0.5	51	4	31	NA
126BC	F	Cre-	137	101	1980	Dark	43755.2	2236.78	21.163	21.039	0.124	1.6	2019.73	0.041	0.232	0.191	2.9	0.902963	0.2	0.5	122	71	84	NA
126BC	F	Cre-	182	101	2790	Light	43755.7	2231.62	21.163	20.978	0.186	2.2	1882.64	0.041	0.315	0.274	3.8	0.843622	0.3	0.5	1544	777	1087	NA
126BC	F	Cre-	243	101	3888	Light	43756.5	2201.97	21.163	21.061	0.102	2.9	2070.39	0.041	0.243	0.202	5.1	0.940243	0.2	0.5	397	168	333	NA
126LP	F	Cre-	29	106	342	Dark	43750	3053.68	21.163	20.914	0.248	0.5	2589.91	0.045	0.324	0.279	0.6	0.848127	0.4	0.5	1525	886	1162	509
126LP	F	Cre-	94	106	1512	Dark	43750.9	3053.51	21.163	20.919	0.244	1.3	2646.34	0.041	0.362	0.322	1.9	0.866656	0.4	0.5	1197	614	865	379
126LP	F	Cre-	67	106	1026	Light	43750.5	3044.53	21.163	21.041	0.122	1	2622.76	0.041	0.232	0.192	1.4	0.861469	0.2	0.5	23	10	42	10
126LP	F	Cre-	170	106	2880	Dark	43751.8	3013.62	21.163	21.039	0.124	2.3	2657.17	0.04	0.254	0.214	3.5	0.881722	0.2	0.5	57	3	51	13
126LP	F	Cre-	145	106	2430	Light	43751.5	3006.1	21.163	21.076	0.087	2	2519.19	0.041	0.197	0.156	3	0.838026	0.1	0.5	29	7	13	3
126LP	F	Cre-	5	106	NA	NA	43749.7	3004.36	21.163	20.971	0.192	0.1	2526.48	0.039	0.276	0.238	0.1	0.840938	0.3	0.5	1096	535	994	394
126LP	F	Cre-	74	106	1152	Light	43750.6	3001.45	21.163	21.028	0.135	1.1	2674.45	0.04	0.23	0.19	1.5	0.891051	0.2	0.5	48	25	35	17
126LP	F	Cre-	32	106	396	Dark	43750.1	2998.35	21.163	21.009	0.154	0.5	2575.24	0.045	0.253	0.207	0.7	0.858884	0.2	0.5	269	125	296	111
126LP	F	Cre-	141	106	2358	Light	43751.4	2980.97	21.163	21.077	0.086	2	2316.75	0.041	0.211	0.17	2.9	0.777179	0.1	0.5	23	5	19	3
126LP	F	Cre-	223	106	3834	Light	43752.5	2977.05	21.163	21.025	0.137	3	2578.74	0.045	0.278	0.234	4.6	0.866206	0.2	0.5	38	11	69	11
126LP	F	Cre-	287	106	4986	Dark	43753.3	2970.3	21.162	20.971	0.192	3.9	2572.84	0.048	0.291	0.242	6.1	0.866188	0.3	0.5	548	314	731	218
126LP	F	Cre-	38	106	504	Dark	43750.2	2969.35	21.163	21.024	0.139	0.6	2286.74	0.046	0.23	0.184	0.8	0.770113	0.2	0.5	47	21	55	27
126LP	F	Cre-	180	106	3060	Dark	43751.9	2965.21	21.163	21.027	0.136	2.4	2209.73	0.042	0.268	0.226	3.7	0.745217	0.2	0.5	985	632	844	422
126LP	F	Cre-	42	106	576	Dark	43750.2	2964.26	21.163	20.941	0.222	0.7	2611.33	0.046	0.331	0.285	0.9	0.88094	0.3	0.5	1993	1209	1312	607
126LP	F	Cre-	235	106	4050	Light	43752.6	2957.8	21.163	21.038	0.125	3.1	2481.32	0.04	0.263	0.223	4.9	0.838907	0.2	0.5	149	64	262	35
126LP	F	Cre-	278	106	4824	Dark	43753.2	2952.56	21.163	20.957	0.206	3.8	2584.77	0.047	0.334	0.287	5.9	0.875435	0.3	0.5	743	166	642	172
126LP	F	Cre-	198	106	3384	Dark	43752.2	2950.71	21.163	20.985	0.178	2.7	2220.16	0.045	0.274	0.229	4.1	0.752416	0.3	0.5	160	16	237	63
126LP	F	Cre-	249	106	4302	Light	43752.8	2943.49	21.163	20.964	0.199	3.3	2474.07	0.042	0.332	0.29	5.2	0.840521	0.3	0.5	1328	789	1229	554
126LP	F	Cre-	237	106	4086	Light	43752.6	2939.43	21.163	21.058	0.105	3.2	2533.52	0.04	0.241	0.201	4.9	0.861911	0.2	0.5	66	17	73	25
126LP	F	Cre-	206	106	3528	Dark	43752.3	2938.66	21.163	20.999	0.164	2.8	2502.51	0.043	0.273	0.229	4.3	0.851583	0.3	0.5	75	15	116	30
126LP	F	Cre-	132	106	2196	Light	43751.3	2937.15	21.163	21.001	0.162	1.9	2507.39	0.042	0.247	0.205	2.8	0.853684	0.2	0.5	1203	703	1167	580
126LP	F	Cre-	65	106	990	Light	43750.5	2936.12	21.163	21.029	0.134	1	2189.75	0.041	0.251	0.211	1.4	0.745799	0.2	0.5	411	131	352	119
126LP	F	Cre-	179	106	3042	Dark	43751.9	2930.54	21.163	20.957	0.206	2.4	2467.14	0.042	0.342	0.3	3.7	0.841872	0.3	0.5	1485	799	1258	588
126LP	F	Cre-	171	106	2898	Dark	43751.8	2925.16	21.163	21.045	0.118	2.3	2588.92	0.04	0.254	0.214	3.5	0.885052	0.2	0.5	44	14	39	13
126LP	F	Cre-	230	106	3960	Light	43752.6	2924.64	21.163	21.049	0.114	3.1	2578.73	0.04	0.251	0.21	4.8	0.881725	0.2	0.5	53	12	40	12
126LP	F	Cre-	107	106	1746	Dark	43751	2923.16	21.163	20.917	0.245	1.6	2535.83	0.043	0.312	0.269	2.3	0.867498	0.4	0.5	2944	2123	2229	1333
126LP	F	Cre-	184	106	3132	Dark	43752	2922.82	21.163	20.995	0.168	2.5	2657.54	0.042	0.294	0.252	3.8	0.909238	0.3	0.5	304	114	306	134
126LP	F	Cre-	24	106	252	Dark	43750	2917.93	21.163	20.911	0.252	0.4	2502.44	0.045	0.349	0.304	0.5	0.857606	0.4	0.5	2750	1888	1755	925
126LP	F	Cre-	100	106	1620	Dark	43750.9	2916.48	21.163	20.903	0.26	1.4	2246.6	0.043	0.368	0.326	2.1	0.770313	0.4	0.5	2444	1672	1839	961
126LP	F	Cre-	247	106	4266	Light	43752.8	2914.27	21.163	21.059	0.104	3.2	2371.44	0.041	0.24	0.199	5.1	0.813732	0.2	0.5	82	22	161	49
126LP	F	Cre-	114	106	1872	Dark	43751.1	2912.85	21.163	20.958	0.205	1.7	2394.68	0.042	0.282	0.24	2.4	0.822108	0.3	0.5	2960	2097	2178	1356
126LP	F	Cre-	34	106	432	Dark	43750.1	2909.23	21.163	20.915	0.248	0.6	2425.88	0.046	0.336	0.29	0.7	0.833857	0.4	0.5	1275	643	964	359
126LP	F	Cre-	17	106	126	Dark	43749.9	2903.57	21.163	20.986	0.177	0.3	2171.21	0.043	0.294	0.251	0.3	0.747772	0.3	0.5	688	287	663	255
126LP	F	Cre-	57	106	846	Light	43750.4	2902.41	21.163	21.045	0.118	0.9	2534.96	0.044	0.209	0.165	1.2	0.873398	0.2	0.5	30	1	6	4
126LP	F	Cre-	51	106	738	Light	43750.3	2900.61	21.163	20.975	0.188	0.8	2528.95	0.045	0.28	0.235	1.1	0.871868	0.3	0.5	910	308	650	224
126LP	F	Cre-	63	106	954	Light	43750.5	2899.92	21.163	20.969	0.194	1	2335.11	0.042	0.307	0.265	1.3	0.805233	0.3	0.5	253	107	230	65
126LP	F	Cre-	165	106	2790	Light	43751.7	2898.39	21.163	21.002	0.161	2.3	2383.31	0.041	0.285	0.244	3.4	0.822289	0.2	0.5	421	190	687	178
126LP	F	Cre-	290	106	5040	Light	43753.3	2896.09	21.162	21.003	0.159	3.9	2299.88	0.049	0.264	0.215	6.2	0.794131	0.2	0.5	907	448	891	355
126LP	F	Cre-	262	106	4536	Dark	43753	2895.93	21.163	20.888	0.275	3.4	2494.82	0.044	0.412	0.367	5.5	0.861493	0.4	0.5	2093	1390	1658	809
126LP	F	Cre-	22	106	216	Dark	43750	2894.92	21.163	20.885	0.278	0.3	2438.1	0.044	0.39	0.346	0.5	0.842197	0.4	0.5	3034	2202	1923	1069
126LP	F	Cre-	225	106	3870	Light	43752.5	2894.83	21.163	21.04	0.123	3	2644.42	0.042	0.244	0.203	4.7	0.913496	0.2	0.5	301	54	202	49
126LP	F	Cre-	77	106	1206	Light	43750.6	2894.81	21.163	20.964	0.199	1.1	2503.63	0.039	0.315	0.276	1.6	0.864865	0.3	0.5	831	333	844	280
126LP	F	Cre-	197	106	3366	Dark	43752.1	2892	21.163	21.028	0.135	2.7	2541.71	0.045	0.242	0.197	4.1	0.878877	0.2	0.5	89	9	103	37
126LP	F	Cre-	188	106	3204	Dark	43752	2887.8	21.163	20.924	0.239	2.6	2454.74	0.042	0.337	0.294	3.9	0.850038	0.4	0.5	2639	1838	2107	1144
126LP	F	Cre-	76	106	1188	Light	43750.6	2885.08	21.163	21.052	0.111	1.1	2288.89	0.039	0.207	0.168	1.6	0.793354	0.2	0.5	44	1	34	1
126LP	F	Cre-	195	106	3330	Dark	43752.1	2882.9	21.163	20.966	0.197	2.7	2256.62	0.045	0.288	0.243	4.1	0.78276	0.3	0.5	1391	834	1217	571
126LP	F	Cre-	201	106	3438	Dark	43752.2	2881.91	21.163	20.959	0.204	2.8	2614.66	0.045	0.32	0.275	4.2	0.907265	0.3	0.5	414	196	380	115
126LP	F	Cre-	81	106	1278	Light	43750.7	2881.47	21.163	21.029	0.135	1.2	2179.45	0.039	0.225	0.187	1.7	0.756369	0.2	0.5	43	13	33	2
126LP	F	Cre-	112	106	1836	Dark	43751.1	2881.02	21.163	20.941	0.222	1.7	2444.25	0.042	0.3	0.258	2.4	0.848398	0.3	0.5	2402	1696	1728	981
126LP	F	Cre-	1	106	NA	NA	43749.7	2878.7	21.163	20.888	0.275	0	2623.12	0.044	0.355	0.311	0	0.911217	0.4	0.5	780	356	755	303
126LP	F	Cre-	105	106	1710	Dark	43751	2877.1	21.163	20.886	0.277	1.5	2476.68	0.044	0.354	0.309	2.2	0.860826	0.4	0.5	2652	1898	2084	1200
126LP	F	Cre-	181	106	3078	Dark	43751.9	2876.83	21.163	20.956	0.207	2.4	2174.31	0.042	0.334	0.292	3.7	0.7558	0.3	0.5	1234	747	979	424
126LP	F	Cre-	236	106	4068	Light	43752.6	2872.2	21.163	21.064	0.099	3.1	2338.65	0.04	0.236	0.196	4.9	0.814235	0.2	0.5	37	5	24	12
126LP	F	Cre-	200	106	3420	Dark	43752.2	2870.65	21.163	21.033	0.129	2.8	2403.15	0.045	0.25	0.205	4.2	0.837143	0.2	0.5	109	58	106	48
126LP	F	Cre-	202	106	3456	Dark	43752.2	2869.12	21.163	20.938	0.225	2.8	2247.87	0.045	0.348	0.303	4.2	0.783472	0.3	0.5	2133	1357	1444	767
126LP	F	Cre-	167	106	2826	Light	43751.8	2866.93	21.163	21.061	0.102	2.3	2570.24	0.04	0.238	0.198	3.4	0.896513	0.2	0.5	35	7	42	10
126LP	F	Cre-	283	106	4914	Dark	43753.2	2865.58	21.163	20.977	0.185	3.8	2561.92	0.047	0.291	0.244	6	0.894033	0.3	0.5	327	30	293	76
126LP	F	Cre-	28	106	324	Dark	43750	2864.21	21.163	20.916	0.247	0.5	2392.31	0.045	0.328	0.284	0.6	0.835244	0.4	0.5	1839	1052	1387	649
126LP	F	Cre-	120	106	1980	Dark	43751.2	2855.9	21.163	20.975	0.188	1.8	2290.13	0.042	0.281	0.239	2.5	0.801896	0.3	0.5	2651	1878	1876	1103
126LP	F	Cre-	240	106	4140	Light	43752.7	2851.58	21.163	21.053	0.11	3.2	2132.03	0.04	0.25	0.21	5	0.747665	0.2	0.5	37	7	59	17
126LP	F	Cre-	157	106	2646	Light	43751.6	2849.17	21.163	21.051	0.113	2.2	2127.86	0.04	0.226	0.185	3.2	0.746835	0.2	0.5	48	17	37	5
126LP	F	Cre-	61	106	918	Light	43750.4	2847.84	21.163	21.031	0.132	0.9	2363.29	0.042	0.245	0.202	1.3	0.829851	0.2	0.5	118	55	120	37
126LP	F	Cre-	270	106	4680	Dark	43753.1	2847.61	21.163	20.914	0.249	3.6	2351.93	0.046	0.353	0.307	5.7	0.825933	0.4	0.5	2860	2064	2232	1270
126LP	F	Cre-	50	106	720	Light	43750.3	2842.96	21.163	21.021	0.141	0.8	2471.77	0.045	0.238	0.193	1.1	0.869436	0.2	0.5	41	14	45	16
126LP	F	Cre-	83	106	1314	Light	43750.7	2839.25	21.163	20.976	0.187	1.2	2319.55	0.039	0.304	0.265	1.7	0.816958	0.3	0.5	645	228	560	139
126LP	F	Cre-	221	106	3798	Light	43752.4	2830.7	21.163	21.041	0.122	3	2478.23	0.046	0.261	0.215	4.6	0.875483	0.2	0.5	355	114	423	116
126LP	F	Cre-	119	106	1962	Dark	43751.2	2828.36	21.163	20.934	0.229	1.8	2240.24	0.042	0.313	0.271	2.5	0.792065	0.3	0.5	1255	802	1013	511
126LP	F	Cre-	71	106	1098	Light	43750.6	2824.68	21.163	20.969	0.194	1	2565.36	0.04	0.315	0.275	1.5	0.908197	0.3	0.5	747	273	757	290
126LP	F	Cre-	68	106	1044	Light	43750.5	2820.91	21.163	21.048	0.115	1	2184.58	0.04	0.218	0.178	1.4	0.774425	0.2	0.5	31	5	116	12
126LP	F	Cre-	98	106	1584	Dark	43750.9	2819.91	21.163	21.008	0.155	1.4	2590.52	0.042	0.241	0.199	2	0.918653	0.2	0.5	119	31	48	16
126LP	F	Cre-	172	106	2916	Dark	43751.8	2819.27	21.163	21.051	0.113	2.3	2169.74	0.04	0.249	0.208	3.5	0.769609	0.2	0.5	67	38	52	14
126LP	F	Cre-	242	106	4176	Light	43752.7	2811.09	21.163	21.064	0.1	3.2	2297.13	0.041	0.232	0.192	5	0.817166	0.2	0.5	61	16	80	23
126LP	F	Cre-	10	106	0	Dark	43749.8	2807.51	21.163	21.042	0.121	0.2	2091.05	0.039	0.214	0.175	0.2	0.744807	0.2	0.5	420	133	455	123
126LP	F	Cre-	208	106	3564	Dark	43752.3	2804.22	21.163	21.031	0.132	2.9	2574.16	0.045	0.257	0.212	4.3	0.91796	0.2	0.5	130	14	164	35
126LP	F	Cre-	97	106	1566	Dark	43750.9	2799.85	21.163	21.025	0.139	1.4	2540.66	0.041	0.232	0.19	2	0.907425	0.2	0.5	60	11	47	14
126LP	F	Cre-	294	106	5112	Light	43753.4	2796.23	21.162	21.022	0.14	4	2086.37	0.051	0.27	0.219	6.3	0.746137	0.2	0.5	299	163	299	101
126LP	F	Cre-	246	106	4248	Light	43752.8	2794.68	21.163	21.037	0.126	3.2	2546.45	0.041	0.268	0.227	5.1	0.91118	0.2	0.5	129	81	58	26
126LP	F	Cre-	251	106	4338	Dark	43752.8	2791.21	21.163	21.04	0.124	3.3	2447.53	0.042	0.244	0.202	5.2	0.876872	0.2	0.5	55	6	84	20
126LP	F	Cre-	78	106	1224	Light	43750.7	2789.49	21.163	20.962	0.201	1.1	2473.89	0.039	0.312	0.272	1.6	0.886862	0.3	0.5	373	95	438	89
126LP	F	Cre-	126	106	2088	Dark	43751.3	2788.63	21.163	21.036	0.127	1.9	2120.29	0.041	0.232	0.191	2.6	0.760337	0.2	0.5	82	46	64	31
126LP	F	Cre-	104	106	1692	Dark	43751	2787.78	21.163	20.857	0.306	1.5	2449.44	0.044	0.381	0.337	2.2	0.878635	0.5	0.5	2514	1648	1940	1061
126LP	F	Cre-	155	106	2610	Light	43751.6	2785.41	21.163	20.984	0.179	2.2	2514.94	0.041	0.289	0.249	3.2	0.902896	0.3	0.5	866	431	591	216
126LP	F	Cre-	160	106	2700	Light	43751.7	2779.05	21.163	21.016	0.147	2.2	2172.21	0.04	0.278	0.238	3.3	0.781637	0.2	0.5	409	94	484	82
126LP	F	Cre-	69	106	1062	Light	43750.5	2778.71	21.163	21.045	0.118	1	2133.67	0.04	0.234	0.194	1.4	0.767862	0.2	0.5	127	52	148	51
126LP	F	Cre-	241	106	4158	Light	43752.7	2777.05	21.163	21.048	0.115	3.2	2212.25	0.04	0.252	0.212	5	0.79662	0.2	0.5	14	5	24	6
126LP	F	Cre-	148	106	2484	Light	43751.5	2775.56	21.163	21.048	0.115	2.1	2405.55	0.041	0.217	0.176	3	0.866688	0.2	0.5	250	67	356	97
126LP	F	Cre-	93	106	1494	Dark	43750.8	2770.99	21.163	21.025	0.138	1.3	2201.83	0.041	0.247	0.206	1.9	0.7946	0.2	0.5	108	5	23	8
126LP	F	Cre-	259	106	4482	Dark	43752.9	2770.39	21.163	20.997	0.166	3.4	2218.3	0.044	0.3	0.256	5.4	0.800719	0.3	0.5	169	62	308	74
126LP	F	Cre-	207	106	3546	Dark	43752.3	2768.26	21.163	20.959	0.204	2.9	2431.92	0.043	0.319	0.276	4.3	0.8785	0.3	0.5	890	393	917	323
126LP	F	Cre-	250	106	4320	Dark	43752.8	2767.65	21.163	21.023	0.141	3.3	2433.77	0.041	0.274	0.232	5.2	0.879363	0.2	0.5	196	15	297	66
126LP	F	Cre-	281	106	4878	Dark	43753.2	2767.46	21.163	20.986	0.177	3.8	2158.46	0.047	0.277	0.23	6	0.779943	0.3	0.5	1396	730	977	475
126LP	F	Cre-	213	106	3654	Light	43752.3	2766.3	21.163	21.032	0.13	2.9	2350.32	0.047	0.259	0.212	4.4	0.849625	0.2	0.5	8	4	41	7
126LP	F	Cre-	128	106	2124	Dark	43751.3	2764.46	21.163	21.057	0.106	1.9	2124.43	0.041	0.208	0.167	2.7	0.768478	0.2	0.5	45	10	42	1
126LP	F	Cre-	194	106	3312	Dark	43752.1	2762.04	21.163	20.967	0.196	2.7	2342.29	0.045	0.302	0.257	4	0.84803	0.3	0.5	1622	1008	1241	626
126LP	F	Cre-	248	106	4284	Light	43752.8	2760.08	21.163	20.973	0.19	3.3	2397.39	0.042	0.337	0.296	5.1	0.868593	0.3	0.5	383	176	452	139
126LP	F	Cre-	6	106	NA	NA	43749.8	2759.71	21.163	20.996	0.168	0.1	2061.43	0.038	0.253	0.215	0.1	0.746976	0.3	0.5	691	334	670	272
126LP	F	Cre-	19	106	162	Dark	43749.9	2758.97	21.163	21.031	0.132	0.3	2497.65	0.044	0.252	0.208	0.4	0.905284	0.2	0.5	339	184	189	101
126LP	F	Cre-	37	106	486	Dark	43750.1	2758.41	21.163	21.012	0.15	0.6	2219.03	0.046	0.256	0.21	0.8	0.804459	0.2	0.5	345	137	477	133
126LP	F	Cre-	40	106	540	Dark	43750.2	2757.5	21.163	20.924	0.239	0.7	2443.17	0.045	0.346	0.3	0.9	0.886008	0.4	0.5	2066	1401	1416	721
126LP	F	Cre-	245	106	4230	Light	43752.7	2756.37	21.163	21.043	0.121	3.2	2387.52	0.041	0.263	0.223	5.1	0.866183	0.2	0.5	20	1	26	5
126LP	F	Cre-	55	106	810	Light	43750.4	2754.46	21.162	20.98	0.182	0.9	2347.52	0.051	0.28	0.229	1.2	0.852261	0.3	0.5	673	315	541	200
126LP	F	Cre-	255	106	4410	Dark	43752.9	2750.93	21.163	21.032	0.131	3.3	2376.92	0.042	0.26	0.218	5.3	0.864045	0.2	0.5	28	4	60	14
126LP	F	Cre-	109	106	1782	Dark	43751	2748.95	21.163	20.925	0.238	1.6	2235.67	0.042	0.307	0.264	2.3	0.813282	0.4	0.5	2285	1497	1764	918
126LP	F	Cre-	215	106	3690	Light	43752.4	2747.36	21.163	20.994	0.169	2.9	2335.33	0.048	0.295	0.248	4.5	0.850028	0.3	0.5	151	27	191	36
126LP	F	Cre-	60	106	900	Light	43750.4	2746.16	21.163	20.993	0.171	0.9	2407.86	0.042	0.257	0.214	1.3	0.876809	0.3	0.5	169	91	115	35
126LP	F	Cre-	85	106	1350	Light	43750.7	2746.06	21.163	21.039	0.124	1.2	2109.43	0.04	0.241	0.201	1.7	0.768167	0.2	0.5	92	54	76	44
126LP	F	Cre-	288	106	5004	Dark	43753.3	2745.15	21.162	20.99	0.172	3.9	2306.54	0.049	0.284	0.235	6.1	0.840222	0.3	0.5	114	26	86	18
126LP	F	Cre-	121	106	1998	Dark	43751.2	2741.18	21.163	20.979	0.184	1.8	2392.65	0.041	0.27	0.228	2.6	0.872853	0.3	0.5	1680	1011	1339	671
126LP	F	Cre-	58	106	864	Light	43750.4	2740.46	21.163	21.01	0.153	0.9	2053.41	0.044	0.24	0.197	1.2	0.749295	0.2	0.5	389	93	378	76
126LP	F	Cre-	82	106	1296	Light	43750.7	2740.04	21.163	21.05	0.114	1.2	2425.05	0.039	0.206	0.167	1.7	0.885042	0.2	0.5	12	4	5	1
126LP	F	Cre-	117	106	1926	Dark	43751.1	2740.03	21.163	21.042	0.121	1.7	2468.56	0.041	0.212	0.171	2.5	0.900925	0.2	0.5	60	13	100	27
126LP	F	Cre-	49	106	702	Dark	43750.3	2736.31	21.163	21.007	0.155	0.8	2467.66	0.045	0.252	0.206	1.1	0.90182	0.2	0.5	56	19	31	15
126LP	F	Cre-	84	106	1332	Light	43750.7	2734.76	21.163	21.026	0.138	1.2	2485.13	0.039	0.25	0.211	1.7	0.908719	0.2	0.5	241	99	389	150
126LP	F	Cre-	284	106	4932	Dark	43753.2	2734.27	21.163	20.951	0.211	3.9	2159.58	0.047	0.308	0.261	6.1	0.78982	0.3	0.5	1578	1104	1030	566
126LP	F	Cre-	267	106	4626	Dark	43753	2732.94	21.163	20.902	0.261	3.5	2339.89	0.045	0.379	0.333	5.6	0.856182	0.4	0.5	3560	2631	2366	1426
126LP	F	Cre-	166	106	2808	Light	43751.8	2732.61	21.163	21.037	0.126	2.3	2506.25	0.04	0.256	0.216	3.4	0.917166	0.2	0.5	130	7	34	17
126LP	F	Cre-	301	106	5238	Light	43753.4	2729.89	21.163	21.036	0.127	4	2341.15	0.044	0.277	0.232	6.4	0.857598	0.2	0.5	144	91	110	56
126LP	F	Cre-	27	106	306	Dark	43750	2726.93	21.163	20.914	0.249	0.4	2520.76	0.045	0.315	0.27	0.6	0.924396	0.4	0.5	2603	1701	1742	900
126LP	F	Cre-	108	106	1764	Dark	43751	2726.14	21.163	20.932	0.231	1.6	2447.36	0.043	0.31	0.267	2.3	0.897738	0.4	0.5	2939	2154	2178	1247
126LP	F	Cre-	135	106	2250	Light	43751.4	2725.76	21.163	21.064	0.099	2	2061.02	0.046	0.205	0.159	2.8	0.756126	0.2	0.5	579	313	460	193
126LP	F	Cre-	35	106	450	Dark	43750.1	2724.54	21.163	20.945	0.218	0.6	2038.68	0.045	0.327	0.282	0.8	0.748267	0.3	0.5	531	214	342	135
126LP	F	Cre-	175	106	2970	Dark	43751.9	2723.25	21.163	21.037	0.126	2.4	2132.98	0.042	0.263	0.222	3.6	0.783248	0.2	0.5	324	136	386	109
126LP	F	Cre-	291	106	5058	Light	43753.3	2722.29	21.162	21.037	0.125	4	2281.37	0.05	0.231	0.182	6.2	0.838034	0.2	0.5	273	60	257	74
126LP	F	Cre-	30	106	360	Dark	43750.1	2720.74	21.163	20.941	0.222	0.5	2040.47	0.046	0.295	0.249	0.7	0.749969	0.3	0.5	1524	846	1400	545
126LP	F	Cre-	212	106	3636	Light	43752.3	2718.56	21.163	21.049	0.113	2.9	2413.26	0.048	0.246	0.199	4.4	0.887696	0.2	0.5	484	188	646	194
126LP	F	Cre-	269	106	4662	Dark	43753	2716.56	21.163	20.904	0.259	3.6	2099.2	0.045	0.344	0.299	5.7	0.772744	0.4	0.5	2905	2059	2195	1299
126LP	F	Cre-	274	106	4752	Dark	43753.1	2714.47	21.163	20.938	0.225	3.7	2220.45	0.046	0.347	0.3	5.8	0.818004	0.3	0.5	1979	1274	1631	876
126LP	F	Cre-	285	106	4950	Dark	43753.2	2714.33	21.163	20.987	0.176	3.9	2103.19	0.046	0.276	0.23	6.1	0.774847	0.3	0.5	1030	614	1167	497
126LP	F	Cre-	80	106	1260	Light	43750.7	2713.9	21.163	21.042	0.121	1.2	2433.19	0.039	0.216	0.177	1.7	0.896568	0.2	0.5	29	9	34	14
126LP	F	Cre-	33	106	414	Dark	43750.1	2712.84	21.163	21.022	0.141	0.5	2384.23	0.046	0.227	0.182	0.7	0.878868	0.2	0.5	28	3	10	3
126LP	F	Cre-	73	106	1134	Light	43750.6	2712.54	21.163	21.039	0.124	1.1	2094.18	0.04	0.228	0.188	1.5	0.772037	0.2	0.5	19	3	21	2
126LP	F	Cre-	280	106	4860	Dark	43753.2	2710.36	21.163	20.985	0.178	3.8	2122.52	0.047	0.281	0.234	6	0.783116	0.3	0.5	1184	680	1209	511
126LP	F	Cre-	279	106	4842	Dark	43753.2	2707.37	21.163	20.973	0.19	3.8	2362.42	0.047	0.304	0.257	5.9	0.87259	0.3	0.5	446	246	287	125
126LP	F	Cre-	214	106	3672	Light	43752.4	2706.78	21.163	21.043	0.119	2.9	2152.11	0.048	0.248	0.2	4.5	0.79508	0.2	0.5	36	8	65	19
126LP	F	Cre-	103	106	1674	Dark	43751	2704.87	21.163	20.907	0.256	1.5	2142.64	0.044	0.349	0.305	2.1	0.792141	0.4	0.5	2459	1632	1802	957
126LP	F	Cre-	260	106	4500	Dark	43752.9	2704.38	21.163	21.008	0.154	3.4	2062.56	0.045	0.289	0.244	5.4	0.762677	0.2	0.5	26	6	74	12
126LP	F	Cre-	219	106	3762	Light	43752.4	2703.77	21.162	21.004	0.159	3	2129.2	0.049	0.298	0.249	4.6	0.787493	0.2	0.5	420	114	433	133
126LP	F	Cre-	101	106	1638	Dark	43750.9	2700.74	21.163	20.902	0.261	1.4	2231.57	0.043	0.368	0.325	2.1	0.826281	0.4	0.5	2333	1683	1726	932
126LP	F	Cre-	138	106	2304	Light	43751.4	2700.24	21.163	21.063	0.1	2	2157.52	0.041	0.229	0.188	2.9	0.799008	0.2	0.5	102	67	88	28
126LP	F	Cre-	96	106	1548	Dark	43750.9	2697.15	21.163	21.018	0.145	1.3	2301.53	0.041	0.251	0.21	2	0.853319	0.2	0.5	507	111	447	111
126LP	F	Cre-	4	106	NA	NA	43749.7	2694.21	21.163	20.95	0.213	0.1	2397.68	0.039	0.292	0.253	0.1	0.889937	0.3	0.5	1120	448	947	330
126LP	F	Cre-	99	106	1602	Dark	43750.9	2693.68	21.163	20.922	0.241	1.4	2149.96	0.042	0.345	0.303	2	0.798148	0.4	0.5	1497	840	1306	551
126LP	F	Cre-	137	106	2286	Light	43751.4	2692.77	21.163	21.032	0.131	2	2227.96	0.041	0.237	0.195	2.8	0.827387	0.2	0.5	208	93	211	66
126LP	F	Cre-	264	106	4572	Dark	43753	2686.38	21.163	20.899	0.264	3.5	2356.24	0.044	0.394	0.35	5.5	0.877107	0.4	0.5	2965	2188	1960	1163
126LP	F	Cre-	44	106	612	Dark	43750.2	2685.71	21.163	21.011	0.152	0.7	2323.74	0.046	0.261	0.215	1	0.865227	0.2	0.5	23	1	11	0
126LP	F	Cre-	86	106	1368	Light	43750.8	2685.52	21.163	21.026	0.138	1.2	2286.61	0.04	0.249	0.209	1.8	0.851459	0.2	0.5	10	0	1	1
126LP	F	Cre-	115	106	1890	Dark	43751.1	2684.77	21.163	20.991	0.172	1.7	2321.84	0.042	0.258	0.216	2.4	0.864819	0.3	0.5	868	341	874	328
126LP	F	Cre-	124	106	2052	Dark	43751.2	2683.6	21.163	20.999	0.164	1.8	2167.9	0.041	0.252	0.211	2.6	0.807835	0.3	0.5	194	66	133	38
126LP	F	Cre-	21	106	198	Dark	43749.9	2681.59	21.163	20.919	0.244	0.3	2330.21	0.043	0.364	0.321	0.4	0.868964	0.4	0.5	1150	694	789	339
126LP	F	Cre-	159	106	2682	Light	43751.7	2681.05	21.163	21.057	0.107	2.2	2832.37	0.04	0.228	0.187	3.2	1.05644	0.2	0.5	145	17	228	47
126LP	F	Cre-	277	106	4806	Dark	43753.1	2674.79	21.163	20.944	0.218	3.7	2110.81	0.046	0.35	0.304	5.9	0.789151	0.3	0.5	1383	777	1195	526
126LP	F	Cre-	257	106	4446	Dark	43752.9	2671.46	21.163	20.935	0.228	3.4	2095.28	0.043	0.368	0.325	5.3	0.78432	0.4	0.5	1469	747	1100	459
126LP	F	Cre-	36	106	468	Dark	43750.1	2671.36	21.163	21.002	0.161	0.6	2423.77	0.045	0.267	0.222	0.8	0.907315	0.2	0.5	91	29	117	19
126LP	F	Cre-	47	106	666	Dark	43750.3	2670.86	21.163	21.028	0.135	0.8	2113.85	0.045	0.24	0.196	1	0.791449	0.2	0.5	215	39	246	44
126LP	F	Cre-	234	106	4032	Light	43752.6	2670.77	21.163	21.058	0.105	3.1	2729.7	0.04	0.228	0.189	4.9	1.02207	0.2	0.5	67	11	90	36
126LP	F	Cre-	118	106	1944	Dark	43751.2	2669.17	21.163	21.056	0.107	1.8	2338.76	0.042	0.201	0.159	2.5	0.876215	0.2	0.5	16	3	70	17
126LP	F	Cre-	18	106	144	Dark	43749.9	2668.81	21.163	20.972	0.191	0.3	2168.36	0.044	0.31	0.267	0.4	0.812482	0.3	0.5	440	187	246	99
126LP	F	Cre-	54	106	792	Light	43750.4	2667.43	21.163	20.925	0.238	0.8	2028.82	0.045	0.315	0.27	1.1	0.760591	0.4	0.5	436	108	246	52
126LP	F	Cre-	185	106	3150	Dark	43752	2665.9	21.163	20.954	0.209	2.5	2032.98	0.042	0.336	0.295	3.8	0.762587	0.3	0.5	711	322	704	252
126LP	F	Cre-	268	106	4644	Dark	43753	2665.8	21.163	20.914	0.248	3.6	2086.45	0.046	0.344	0.298	5.7	0.782672	0.4	0.5	2915	2089	2300	1383
126LP	F	Cre-	39	106	522	Dark	43750.2	2665.17	21.163	20.965	0.198	0.6	1978.09	0.045	0.306	0.261	0.9	0.742201	0.3	0.5	464	187	263	94
126LP	F	Cre-	265	106	4590	Dark	43753	2664.77	21.163	20.918	0.245	3.5	2367.53	0.045	0.373	0.328	5.6	0.888456	0.4	0.5	2564	1777	1865	953
126LP	F	Cre-	229	106	3942	Light	43752.5	2664.75	21.163	21.041	0.123	3.1	2304.8	0.04	0.259	0.219	4.8	0.864921	0.2	0.5	45	10	95	45
126LP	F	Cre-	131	106	2178	Light	43751.3	2658.97	21.163	20.951	0.212	1.9	2060.92	0.041	0.294	0.252	2.7	0.775081	0.3	0.5	3128	2237	2113	1169
126LP	F	Cre-	169	106	2862	Light	43751.8	2656.14	21.163	20.996	0.167	2.3	1971.55	0.04	0.31	0.27	3.4	0.74226	0.3	0.5	425	40	494	110
126LP	F	Cre-	158	106	2664	Light	43751.7	2655.84	21.163	21.041	0.123	2.2	2186.24	0.04	0.244	0.204	3.2	0.823182	0.2	0.5	51	6	74	17
126LP	F	Cre-	147	106	2466	Light	43751.5	2655.25	21.163	21.011	0.152	2.1	2241.38	0.041	0.247	0.206	3	0.844132	0.2	0.5	1365	850	1017	468
126LP	F	Cre-	8	106	NA	NA	43749.8	2655.19	21.163	20.957	0.206	0.1	2344.51	0.039	0.278	0.238	0.2	0.882991	0.3	0.5	1207	665	815	364
126LP	F	Cre-	282	106	4896	Dark	43753.2	2652.21	21.163	20.973	0.189	3.8	2397.45	0.046	0.308	0.262	6	0.903946	0.3	0.5	1784	1138	1194	613
126LP	F	Cre-	13	106	54	Dark	43749.8	2651.64	21.163	21.037	0.126	0.2	2397.68	0.041	0.23	0.19	0.3	0.904224	0.2	0.5	667	383	683	308
126LP	F	Cre-	88	106	1404	Light	43750.8	2651.06	21.163	21.021	0.142	1.2	2106.38	0.041	0.26	0.219	1.8	0.794545	0.2	0.5	170	62	109	25
126LP	F	Cre-	183	106	3114	Dark	43752	2645.67	21.163	20.95	0.213	2.5	2372.91	0.042	0.344	0.302	3.8	0.896902	0.3	0.5	1664	1033	1469	718
126LP	F	Cre-	164	106	2772	Light	43751.7	2645.06	21.163	20.944	0.219	2.2	2454.77	0.04	0.351	0.311	3.3	0.92806	0.3	0.5	737	353	644	247
126LP	F	Cre-	177	106	3006	Dark	43751.9	2644.71	21.163	21.021	0.142	2.4	2458.34	0.042	0.273	0.231	3.6	0.929534	0.2	0.5	140	38	59	21
126LP	F	Cre-	211	106	3618	Light	43752.3	2644.07	21.163	20.967	0.196	2.9	2145.9	0.048	0.315	0.267	4.4	0.811591	0.3	0.5	618	352	575	246
126LP	F	Cre-	192	106	3276	Dark	43752.1	2643.42	21.163	20.925	0.238	2.6	2189.15	0.044	0.341	0.297	4	0.82815	0.4	0.5	2761	2038	1990	1156
126LP	F	Cre-	174	106	2952	Dark	43751.9	2642.31	21.163	20.986	0.177	2.4	2164.53	0.041	0.291	0.251	3.5	0.819179	0.3	0.5	1101	644	1136	441
126LP	F	Cre-	90	106	1440	Dark	43750.8	2641.46	21.163	20.954	0.21	1.3	2039.72	0.041	0.333	0.292	1.8	0.772193	0.3	0.5	241	81	488	90
126LP	F	Cre-	139	106	2322	Light	43751.4	2639.04	21.163	21.073	0.09	2	2317.86	0.041	0.22	0.179	2.9	0.878295	0.1	0.5	12	1	48	4
126LP	F	Cre-	75	106	1170	Light	43750.6	2636.55	21.163	21.045	0.119	1.1	1993.4	0.039	0.216	0.176	1.6	0.756066	0.2	0.5	25	7	23	4
126LP	F	Cre-	43	106	594	Dark	43750.2	2630.74	21.163	21.013	0.15	0.7	2204.25	0.047	0.259	0.212	1	0.837883	0.2	0.5	286	65	307	66
126LP	F	Cre-	140	106	2340	Light	43751.4	2623.97	21.163	21.059	0.105	2	2196.5	0.041	0.231	0.19	2.9	0.837091	0.2	0.5	52	22	94	37
126LP	F	Cre-	113	106	1854	Dark	43751.1	2622.6	21.163	20.974	0.189	1.7	2407.66	0.042	0.271	0.229	2.4	0.918042	0.3	0.5	1492	786	1411	587
126LP	F	Cre-	176	106	2988	Dark	43751.9	2622.03	21.163	21.04	0.123	2.4	2434.35	0.042	0.264	0.222	3.6	0.928419	0.2	0.5	11	6	22	7
126LP	F	Cre-	136	106	2268	Light	43751.4	2620.73	21.163	21.075	0.089	2	1991.1	0.041	0.198	0.157	2.8	0.75975	0.1	0.5	27	11	44	13
126LP	F	Cre-	226	106	3888	Light	43752.5	2619.72	21.163	21.06	0.104	3.1	2211.18	0.041	0.221	0.18	4.7	0.844053	0.2	0.5	174	7	46	9
126LP	F	Cre-	252	106	4356	Dark	43752.8	2619.58	21.163	21.048	0.115	3.3	2191.36	0.042	0.229	0.187	5.2	0.836531	0.2	0.5	62	33	66	30
126LP	F	Cre-	273	106	4734	Dark	43753.1	2618.77	21.163	20.922	0.241	3.7	2141.74	0.045	0.351	0.306	5.8	0.817844	0.4	0.5	1724	1084	1484	796
126LP	F	Cre-	3	106	NA	NA	43749.7	2615.92	21.163	20.926	0.238	0	2003.41	0.039	0.309	0.27	0.1	0.765852	0.4	0.5	1184	535	838	288
126LP	F	Cre-	263	106	4554	Dark	43753	2615.63	21.163	20.927	0.236	3.5	2119.23	0.045	0.368	0.323	5.5	0.810219	0.4	0.5	2348	1626	2001	963
126LP	F	Cre-	127	106	2106	Dark	43751.3	2610.94	21.163	21.05	0.113	1.9	2245.28	0.041	0.216	0.174	2.7	0.859951	0.2	0.5	101	65	63	29
126LP	F	Cre-	144	106	2412	Light	43751.5	2608.35	21.163	21.042	0.122	2	2015.55	0.041	0.231	0.19	3	0.77273	0.2	0.5	938	490	759	281
126LP	F	Cre-	243	106	4194	Light	43752.7	2608.01	21.163	21.004	0.159	3.2	1989.03	0.041	0.305	0.264	5	0.762661	0.2	0.5	390	121	309	110
126LP	F	Cre-	295	106	5130	Light	43753.4	2606.48	21.162	21.023	0.14	4	2419.42	0.05	0.27	0.221	6.3	0.928233	0.2	0.5	74	24	107	37
126LP	F	Cre-	289	106	5022	Dark	43753.3	2606.25	21.162	20.966	0.197	3.9	2048.81	0.048	0.298	0.249	6.2	0.786114	0.3	0.5	498	294	371	160
126LP	F	Cre-	189	106	3222	Dark	43752	2603.9	21.163	20.937	0.226	2.6	2128.55	0.044	0.312	0.268	3.9	0.817447	0.3	0.5	3111	2255	2267	1249
126LP	F	Cre-	123	106	2034	Dark	43751.2	2603.61	21.163	21.027	0.136	1.8	2113.82	0.042	0.223	0.181	2.6	0.811884	0.2	0.5	523	315	383	168
126LP	F	Cre-	133	106	2214	Light	43751.3	2603.28	21.163	21.003	0.161	2	2176.11	0.041	0.26	0.219	2.8	0.835909	0.2	0.5	178	67	189	67
126LP	F	Cre-	162	106	2736	Light	43751.7	2603.03	21.163	21.04	0.124	2.2	2403.24	0.04	0.247	0.207	3.3	0.923248	0.2	0.5	22	3	30	3
126LP	F	Cre-	111	106	1818	Dark	43751.1	2601.93	21.163	20.941	0.222	1.6	2074.36	0.042	0.3	0.258	2.4	0.79724	0.3	0.5	2902	2063	2109	1262
126LP	F	Cre-	232	106	3996	Light	43752.6	2598.87	21.163	21.031	0.132	3.1	2081.09	0.04	0.267	0.228	4.8	0.800766	0.2	0.5	89	18	206	59
126LP	F	Cre-	224	106	3852	Light	43752.5	2598.55	21.163	20.99	0.173	3	2006.63	0.045	0.307	0.262	4.7	0.772211	0.3	0.5	290	110	336	102
126LP	F	Cre-	26	106	288	Dark	43750	2596.06	21.163	20.92	0.243	0.4	2457.44	0.045	0.314	0.269	0.6	0.946603	0.4	0.5	2553	1801	1758	824
126LP	F	Cre-	64	106	972	Light	43750.5	2595.46	21.163	20.951	0.212	1	1926.97	0.041	0.326	0.284	1.3	0.742439	0.3	0.5	1672	814	1453	623
126LP	F	Cre-	275	106	4770	Dark	43753.1	2595.3	21.163	20.949	0.213	3.7	2201.99	0.047	0.341	0.295	5.8	0.84845	0.3	0.5	2037	1409	1539	884
126LP	F	Cre-	168	106	2844	Light	43751.8	2595.16	21.163	20.983	0.18	2.3	2296.89	0.04	0.32	0.28	3.4	0.885067	0.3	0.5	308	150	232	65
126LP	F	Cre-	205	106	3510	Dark	43752.2	2591.29	21.163	21.025	0.138	2.8	2192.64	0.043	0.262	0.218	4.3	0.846156	0.2	0.5	16	1	10	1
126LP	F	Cre-	106	106	1728	Dark	43751	2590.46	21.163	20.92	0.243	1.5	2400.66	0.045	0.315	0.27	2.2	0.92673	0.4	0.5	2552	1817	2011	1134
126LP	F	Cre-	110	106	1800	Dark	43751.1	2583.84	21.163	20.927	0.236	1.6	2258.86	0.042	0.303	0.261	2.3	0.874224	0.4	0.5	2772	1870	1798	1039
126LP	F	Cre-	272	106	4716	Dark	43753.1	2582.82	21.163	20.959	0.204	3.6	1925.85	0.045	0.296	0.251	5.8	0.74564	0.3	0.5	2116	1484	1790	1041
126LP	F	Cre-	258	106	4464	Dark	43752.9	2582.05	21.163	20.96	0.203	3.4	2523.79	0.044	0.338	0.294	5.4	0.977437	0.3	0.5	1362	848	1118	554
126LP	F	Cre-	299	106	5202	Light	43753.4	2581.98	21.163	21.069	0.094	4	2000.05	0.047	0.216	0.168	6.3	0.774621	0.1	0.5	17	3	48	7
126LP	F	Cre-	227	106	3906	Light	43752.5	2580.55	21.163	21.061	0.102	3.1	2300.6	0.041	0.22	0.18	4.7	0.891517	0.2	0.5	50	7	52	22
126LP	F	Cre-	228	106	3924	Light	43752.5	2579.2	21.163	20.978	0.185	3.1	2157.13	0.04	0.308	0.267	4.7	0.836357	0.3	0.5	511	237	397	124
126LP	F	Cre-	95	106	1530	Dark	43750.9	2578.83	21.163	20.93	0.233	1.3	2024.43	0.041	0.343	0.302	2	0.785019	0.4	0.5	1865	1249	1576	731
126LP	F	Cre-	41	106	558	Dark	43750.2	2575.42	21.163	20.946	0.217	0.7	2391.69	0.046	0.324	0.279	0.9	0.928657	0.3	0.5	1577	1009	1155	517
126LP	F	Cre-	261	106	4518	Dark	43752.9	2570.68	21.163	20.968	0.195	3.4	2154.62	0.045	0.328	0.283	5.4	0.83815	0.3	0.5	260	38	163	57
126LP	F	Cre-	125	106	2070	Dark	43751.2	2569.05	21.163	21.047	0.117	1.9	2230.04	0.041	0.234	0.193	2.6	0.868039	0.2	0.5	21	2	53	8
126LP	F	Cre-	152	106	2556	Light	43751.6	2568.61	21.163	21.035	0.128	2.1	2392.64	0.041	0.238	0.198	3.1	0.931494	0.2	0.5	170	21	139	44
126LP	F	Cre-	153	106	2574	Light	43751.6	2566.67	21.163	21.06	0.103	2.1	1931.79	0.042	0.217	0.176	3.1	0.752647	0.2	0.5	123	44	138	66
126LP	F	Cre-	220	106	3780	Light	43752.4	2565.82	21.163	20.963	0.199	3	2198.28	0.046	0.338	0.292	4.6	0.856754	0.3	0.5	1217	737	1077	538
126LP	F	Cre-	216	106	3708	Light	43752.4	2565.78	21.163	21.046	0.117	3	2217.49	0.048	0.259	0.211	4.5	0.864257	0.2	0.5	167	18	304	55
126LP	F	Cre-	191	106	3258	Dark	43752.1	2564.66	21.163	20.92	0.243	2.6	2390.13	0.044	0.351	0.307	4	0.931948	0.4	0.5	3139	2270	2415	1388
126LP	F	Cre-	143	106	2394	Light	43751.5	2564.48	21.163	21.011	0.152	2	2111.4	0.041	0.267	0.226	2.9	0.823326	0.2	0.5	591	292	714	288
126LP	F	Cre-	79	106	1242	Light	43750.7	2559.38	21.163	21.021	0.142	1.1	2030.58	0.039	0.242	0.203	1.6	0.79339	0.2	0.5	143	51	306	130
126LP	F	Cre-	173	106	2934	Dark	43751.8	2558.17	21.163	20.974	0.189	2.3	2475.97	0.041	0.324	0.283	3.5	0.967867	0.3	0.5	417	29	395	91
126LP	F	Cre-	296	106	5148	Light	43753.4	2557.85	21.162	21.044	0.118	4	2402.26	0.051	0.245	0.194	6.3	0.939173	0.2	0.5	90	41	94	42
126LP	F	Cre-	182	106	3096	Dark	43752	2555.58	21.163	20.959	0.205	2.5	2101.17	0.042	0.327	0.285	3.7	0.822191	0.3	0.5	1250	673	1360	560
126LP	F	Cre-	48	106	684	Dark	43750.3	2550.4	21.163	21.024	0.139	0.8	2432.89	0.044	0.248	0.204	1	0.953923	0.2	0.5	73	9	14	6
126LP	F	Cre-	56	106	828	Light	43750.4	2549.54	21.163	21.028	0.135	0.9	2131.81	0.045	0.225	0.181	1.2	0.836157	0.2	0.5	345	33	337	73
126LP	F	Cre-	62	106	936	Light	43750.5	2545.04	21.163	21.017	0.146	0.9	2071.74	0.042	0.255	0.213	1.3	0.81403	0.2	0.5	73	12	57	7
126LP	F	Cre-	218	106	3744	Light	43752.4	2543.1	21.163	21.053	0.11	3	2088.17	0.047	0.248	0.201	4.5	0.821113	0.2	0.5	14	2	44	3
126LP	F	Cre-	129	106	2142	Dark	43751.3	2542.92	21.163	20.941	0.222	1.9	2044	0.041	0.309	0.268	2.7	0.803798	0.3	0.5	1203	800	901	461
126LP	F	Cre-	130	106	2160	Light	43751.3	2541.08	21.163	21.027	0.136	1.9	2162.45	0.041	0.227	0.186	2.7	0.850996	0.2	0.5	1793	1274	1379	750
126LP	F	Cre-	149	106	2502	Light	43751.5	2539.98	21.163	20.993	0.17	2.1	1916.36	0.041	0.274	0.233	3	0.754477	0.3	0.5	248	131	148	51
126LP	F	Cre-	266	106	4608	Dark	43753	2538.14	21.163	20.899	0.264	3.5	2414.87	0.045	0.381	0.336	5.6	0.951436	0.4	0.5	3884	2962	2659	1565
126LP	F	Cre-	23	106	234	Dark	43750	2537.97	21.163	20.908	0.255	0.4	2228.38	0.044	0.369	0.325	0.5	0.878018	0.4	0.5	1751	1099	1468	663
126LP	F	Cre-	20	106	180	Dark	43749.9	2535.86	21.163	20.995	0.168	0.3	2019.64	0.044	0.287	0.243	0.4	0.796435	0.3	0.5	692	223	622	211
126LP	F	Cre-	156	106	2628	Light	43751.6	2534.84	21.163	21.028	0.136	2.2	2351.24	0.041	0.259	0.218	3.2	0.927567	0.2	0.5	369	77	255	60
126LP	F	Cre-	190	106	3240	Dark	43752.1	2534.8	21.163	20.935	0.228	2.6	2227.73	0.044	0.338	0.295	3.9	0.878858	0.3	0.5	3006	2123	2116	1277
126LP	F	Cre-	239	106	4122	Light	43752.7	2533.84	21.163	21.051	0.113	3.2	1986.33	0.04	0.259	0.219	5	0.783923	0.2	0.5	293	99	457	101
126LP	F	Cre-	186	106	3168	Dark	43752	2533.68	21.163	20.924	0.239	2.5	2143.29	0.043	0.351	0.308	3.8	0.845921	0.4	0.5	2507	1757	2008	1130
126LP	F	Cre-	286	106	4968	Dark	43753.3	2532.1	21.163	21.003	0.16	3.9	2171.26	0.047	0.259	0.212	6.1	0.857494	0.2	0.5	232	26	311	78
126LP	F	Cre-	163	106	2754	Light	43751.7	2530.99	21.163	21.044	0.119	2.2	2328.96	0.041	0.241	0.2	3.3	0.920177	0.2	0.5	45	6	29	9
126LP	F	Cre-	66	106	1008	Light	43750.5	2528.44	21.163	21.028	0.135	1	2334.44	0.041	0.249	0.209	1.4	0.923271	0.2	0.5	179	16	27	4
126LP	F	Cre-	91	106	1458	Dark	43750.8	2525.2	21.163	21.034	0.129	1.3	2052.24	0.041	0.246	0.205	1.9	0.812704	0.2	0.5	304	164	338	136
126LP	F	Cre-	116	106	1908	Dark	43751.1	2522.05	21.163	21.001	0.162	1.7	2110.7	0.042	0.244	0.202	2.5	0.836901	0.2	0.5	1106	670	987	440
126LP	F	Cre-	31	106	378	Dark	43750.1	2521	21.163	20.956	0.207	0.5	2333.95	0.045	0.281	0.236	0.7	0.925804	0.3	0.5	1237	581	1220	439
126LP	F	Cre-	122	106	2016	Dark	43751.2	2520.37	21.163	20.995	0.169	1.8	1958.39	0.042	0.254	0.213	2.6	0.777023	0.3	0.5	1554	1046	1152	634
126LP	F	Cre-	16	106	108	Dark	43749.9	2519.57	21.163	21.032	0.131	0.2	1994.08	0.043	0.244	0.201	0.3	0.791436	0.2	0.5	209	101	148	50
126LP	F	Cre-	12	106	36	Dark	43749.8	2518.92	21.163	20.938	0.225	0.2	1997.15	0.04	0.304	0.264	0.2	0.79286	0.3	0.5	1345	642	929	400
126LP	F	Cre-	92	106	1476	Dark	43750.8	2516.68	21.163	21.018	0.145	1.3	2187.87	0.041	0.257	0.215	1.9	0.869348	0.2	0.5	39	0	11	4
126LP	F	Cre-	297	106	5166	Light	43753.4	2515.75	21.162	20.989	0.174	4	2171.04	0.05	0.298	0.247	6.3	0.862977	0.3	0.5	479	241	601	186
126LP	F	Cre-	178	106	3024	Dark	43751.9	2509.32	21.163	20.949	0.214	2.4	2022.45	0.042	0.354	0.312	3.6	0.805976	0.3	0.5	589	207	542	138
126LP	F	Cre-	11	106	18	Dark	43749.8	2508.69	21.163	20.973	0.19	0.2	1945.67	0.04	0.283	0.243	0.2	0.775574	0.3	0.5	1289	770	931	408
126LP	F	Cre-	161	106	2718	Light	43751.7	2506.24	21.163	21.025	0.138	2.2	2006.41	0.04	0.262	0.222	3.3	0.800566	0.2	0.5	30	14	31	10
126LP	F	Cre-	204	106	3492	Dark	43752.2	2503.23	21.163	21.036	0.127	2.8	2138.9	0.044	0.256	0.211	4.3	0.854455	0.2	0.5	495	49	430	122
126LP	F	Cre-	2	106	NA	NA	43749.7	2499.1	21.163	20.886	0.277	0	2366.02	0.039	0.345	0.306	0	0.946747	0.4	0.5	1515	813	1226	565
126LP	F	Cre-	300	106	5220	Light	43753.4	2498.42	21.163	21.067	0.096	4	2461.49	0.047	0.246	0.199	6.4	0.985217	0.2	0.5	202	69	247	59
126LP	F	Cre-	52	106	756	Light	43750.3	2498.42	21.163	21.048	0.115	0.8	2272.97	0.045	0.205	0.16	1.1	0.909762	0.2	0.5	137	23	78	23
126LP	F	Cre-	199	106	3402	Dark	43752.2	2497.07	21.163	21.048	0.115	2.8	1947.18	0.045	0.242	0.196	4.2	0.779785	0.2	0.5	336	188	226	85
126LP	F	Cre-	254	106	4392	Dark	43752.9	2495.29	21.163	21.012	0.151	3.3	1899	0.042	0.283	0.241	5.3	0.761035	0.2	0.5	119	7	145	24
126LP	F	Cre-	276	106	4788	Dark	43753.1	2494.17	21.163	20.93	0.233	3.7	2088.85	0.046	0.357	0.311	5.9	0.837492	0.4	0.5	1611	1027	1507	730
126LP	F	Cre-	154	106	2592	Light	43751.6	2492.92	21.163	21.046	0.117	2.1	2080.35	0.041	0.218	0.177	3.1	0.834503	0.2	0.5	25	1	61	7
126LP	F	Cre-	134	106	2232	Light	43751.4	2490.25	21.163	21.013	0.15	2	2017.4	0.041	0.246	0.205	2.8	0.810121	0.2	0.5	206	97	216	98
126LP	F	Cre-	233	106	4014	Light	43752.6	2489.72	21.163	20.995	0.168	3.1	1847.7	0.04	0.295	0.255	4.8	0.74213	0.3	0.5	636	204	538	156
126LP	F	Cre-	238	106	4104	Light	43752.7	2484.34	21.163	21.019	0.145	3.2	2421.56	0.04	0.282	0.242	4.9	0.97473	0.2	0.5	180	13	268	50
126LP	F	Cre-	298	106	5184	Light	43753.4	2483.08	21.162	21.068	0.094	4	2054.7	0.048	0.22	0.171	6.3	0.827482	0.1	0.5	69	5	37	9
126LP	F	Cre-	14	106	72	Dark	43749.9	2469.43	21.163	21.027	0.136	0.2	2077.34	0.041	0.242	0.201	0.3	0.841223	0.2	0.5	362	224	287	121
126LP	F	Cre-	244	106	4212	Light	43752.7	2468.88	21.163	21.037	0.126	3.2	2282.65	0.04	0.267	0.226	5.1	0.924566	0.2	0.5	161	22	210	66
126LP	F	Cre-	256	106	4428	Dark	43752.9	2467.82	21.163	20.985	0.178	3.3	2006.76	0.042	0.309	0.267	5.3	0.813169	0.3	0.5	120	63	177	44
126LP	F	Cre-	142	106	2376	Light	43751.5	2466.52	21.163	21.084	0.079	2	2060.34	0.041	0.203	0.162	2.9	0.835323	0.1	0.5	54	5	45	12
126LP	F	Cre-	292	106	5076	Light	43753.3	2464.3	21.162	21.02	0.142	4	2312.17	0.051	0.245	0.194	6.2	0.938267	0.2	0.5	54	8	26	4
126LP	F	Cre-	231	106	3978	Light	43752.6	2462.84	21.163	21.048	0.115	3.1	2240.47	0.04	0.248	0.208	4.8	0.90971	0.2	0.5	77	11	138	33
126LP	F	Cre-	7	106	NA	NA	43749.8	2462.84	21.163	20.986	0.177	0.1	2180.15	0.039	0.259	0.219	0.1	0.885222	0.3	0.5	1324	789	1122	502
126LP	F	Cre-	9	106	NA	NA	43749.8	2461.31	21.163	20.987	0.176	0.1	2350.49	0.04	0.255	0.215	0.2	0.954978	0.3	0.5	1225	675	1032	436
126LP	F	Cre-	253	106	4374	Dark	43752.8	2454.34	21.163	20.985	0.178	3.3	2038.33	0.042	0.298	0.256	5.3	0.8305	0.3	0.5	334	86	466	115
126LP	F	Cre-	209	106	3582	Dark	43752.3	2453.21	21.163	21.058	0.105	2.9	2227.05	0.046	0.228	0.181	4.4	0.907811	0.2	0.5	50	17	80	21
126LP	F	Cre-	46	106	648	Dark	43750.3	2447.26	21.163	21.038	0.124	0.7	2221.61	0.046	0.221	0.175	1	0.907796	0.2	0.5	82	45	52	23
126LP	F	Cre-	203	106	3474	Dark	43752.2	2445.16	21.163	20.973	0.19	2.8	2420.9	0.045	0.312	0.267	4.2	0.990077	0.3	0.5	1260	687	1085	493
126LP	F	Cre-	72	106	1116	Light	43750.6	2437.51	21.163	21.017	0.146	1.1	1891.59	0.04	0.253	0.213	1.5	0.776034	0.2	0.5	117	10	172	47
126LP	F	Cre-	15	106	90	Dark	43749.9	2431.53	21.163	20.974	0.189	0.2	1957.9	0.042	0.27	0.228	0.3	0.805211	0.3	0.5	378	163	357	134
126LP	F	Cre-	193	106	3294	Dark	43752.1	2429.77	21.163	20.966	0.197	2.7	2064.94	0.045	0.29	0.246	4	0.84985	0.3	0.5	1999	1292	1608	835
126LP	F	Cre-	59	106	882	Light	43750.4	2423.73	21.163	21.047	0.116	0.9	2127.42	0.043	0.208	0.165	1.2	0.877744	0.2	0.5	24	3	15	0
126LP	F	Cre-	210	106	3600	Light	43752.3	2415.86	21.163	21.042	0.121	2.9	2323.54	0.047	0.242	0.195	4.4	0.961785	0.2	0.5	438	169	533	160
126LP	F	Cre-	89	106	1422	Light	43750.8	2413.74	21.163	21.034	0.129	1.2	2207.78	0.041	0.255	0.214	1.8	0.914675	0.2	0.5	7	3	9	0
126LP	F	Cre-	217	106	3726	Light	43752.4	2408.92	21.163	21.036	0.126	3	2136.83	0.047	0.266	0.218	4.5	0.887049	0.2	0.5	45	6	68	30
126LP	F	Cre-	222	106	3816	Light	43752.5	2402.88	21.163	21.035	0.128	3	2260.8	0.047	0.264	0.217	4.6	0.940873	0.2	0.5	56	6	85	11
126LP	F	Cre-	151	106	2538	Light	43751.6	2400.41	21.163	20.994	0.169	2.1	2248.95	0.042	0.295	0.253	3.1	0.9369	0.3	0.5	578	146	729	147
126LP	F	Cre-	271	106	4698	Dark	43753.1	2398.66	21.163	20.918	0.245	3.6	2223.8	0.046	0.348	0.301	5.7	0.927101	0.4	0.5	2490	1795	2153	1259
126LP	F	Cre-	53	106	774	Light	43750.3	2390.55	21.163	21.043	0.12	0.8	2205.31	0.045	0.208	0.163	1.1	0.922508	0.2	0.5	48	1	25	1
126LP	F	Cre-	25	106	270	Dark	43750	2382.99	21.162	20.913	0.248	0.4	1911.62	0.045	0.328	0.284	0.5	0.802193	0.4	0.5	2360	1609	1760	827
126LP	F	Cre-	102	106	1656	Dark	43751	2376.52	21.163	20.914	0.249	1.5	2157.01	0.043	0.349	0.306	2.1	0.907632	0.4	0.5	2559	1738	1824	1082
126LP	F	Cre-	45	106	630	Dark	43750.2	2358.87	21.163	21.024	0.139	0.7	1911.31	0.046	0.242	0.196	1	0.810268	0.2	0.5	52	12	49	25
126LP	F	Cre-	293	106	5094	Light	43753.3	2354.56	21.162	20.989	0.173	4	2096.28	0.051	0.283	0.232	6.2	0.890308	0.3	0.5	632	273	683	208
126LP	F	Cre-	150	106	2520	Light	43751.6	2302.9	21.163	20.978	0.186	2.1	1904.41	0.042	0.285	0.242	3.1	0.826963	0.3	0.5	1364	791	1116	411
126LP	F	Cre-	146	106	2448	Light	43751.5	2279.41	21.163	21.06	0.103	2.1	2298.25	0.04	0.217	0.177	3	1.00827	0.2	0.5	167	121	81	20
126LP	F	Cre-	196	106	3348	Dark	43752.1	2272.17	21.163	20.958	0.204	2.7	2043.7	0.045	0.316	0.272	4.1	0.899449	0.3	0.5	773	220	760	180
126LP	F	Cre-	187	106	3186	Dark	43752	2231.93	21.163	20.922	0.241	2.5	1848.67	0.044	0.346	0.302	3.9	0.82828	0.4	0.5	2960	2107	2163	1203
126LP	F	Cre-	87	106	1386	Light	43750.8	2210.11	21.163	21.036	0.127	1.2	2161.11	0.04	0.239	0.199	1.8	0.97783	0.2	0.5	70	16	36	15
126LP	F	Cre-	70	106	1080	Light	43750.6	2209.75	21.163	20.962	0.202	1	2172.56	0.04	0.326	0.286	1.5	0.983171	0.3	0.5	461	248	380	177
130RC	F	Cre-	168	107	2844	Light	43751.8	4363.28	21.163	21.011	0.153	2.9	3259.33	0.04	0.261	0.221	4.2	0.746991	0.2	0.5	17	7	17	3
130RC	F	Cre-	43	107	594	Dark	43750.2	4244.62	21.163	21.004	0.158	0.7	3331.47	0.047	0.271	0.225	1.1	0.784868	0.2	0.5	31	5	30	4
130RC	F	Cre-	38	107	504	Dark	43750.2	4243.58	21.163	21.009	0.154	0.7	3403.97	0.046	0.266	0.22	0.9	0.802146	0.2	0.5	238	50	268	50
130RC	F	Cre-	200	107	3420	Dark	43752.2	4237.18	21.163	20.846	0.317	3.5	3387.34	0.045	0.418	0.373	5.1	0.799432	0.5	0.5	367	90	329	87
130RC	F	Cre-	257	107	4446	Dark	43752.9	4221.17	21.163	21.009	0.154	4.4	3532.01	0.043	0.276	0.233	6.5	0.836738	0.2	0.5	194	88	138	41
130RC	F	Cre-	7	107	NA	NA	43749.8	4205.23	21.163	21.038	0.125	0.1	3151.38	0.039	0.23	0.191	0.1	0.749395	0.2	0.5	166	35	123	39
130RC	F	Cre-	97	107	1566	Dark	43750.9	4192.06	21.163	20.872	0.291	1.6	3311.24	0.041	0.41	0.368	2.4	0.789884	0.4	0.5	1679	968	1212	577
130RC	F	Cre-	181	107	3078	Dark	43751.9	4186.01	21.163	20.85	0.313	3.1	3107.55	0.042	0.408	0.366	4.6	0.742365	0.5	0.5	3027	2008	1824	960
130RC	F	Cre-	217	107	3726	Light	43752.4	4160.92	21.163	21.02	0.142	3.8	3137.02	0.047	0.282	0.234	5.6	0.753924	0.2	0.5	81	11	91	27
130RC	F	Cre-	29	107	342	Dark	43750	4160.14	21.163	20.866	0.296	0.5	3314.9	0.045	0.402	0.357	0.7	0.796824	0.5	0.5	1607	956	1083	458
130RC	F	Cre-	18	107	144	Dark	43749.9	4125.73	21.163	20.906	0.257	0.3	3499.91	0.044	0.375	0.332	0.4	0.848313	0.4	0.5	1111	416	878	267
130RC	F	Cre-	190	107	3240	Dark	43752.1	4110.83	21.163	20.896	0.267	3.3	3125.7	0.044	0.338	0.294	4.9	0.760358	0.4	0.5	2063	1435	1573	745
130RC	F	Cre-	259	107	4482	Dark	43752.9	4106.23	21.163	20.905	0.257	4.4	3219.78	0.044	0.398	0.354	6.5	0.784121	0.4	0.5	803	349	797	221
130RC	F	Cre-	10	107	0	Dark	43749.8	4100.7	21.163	21.024	0.139	0.2	3135.4	0.039	0.256	0.217	0.2	0.764602	0.2	0.5	169	65	130	55
130RC	F	Cre-	219	107	3762	Light	43752.4	4098.89	21.162	20.926	0.236	3.8	3521.5	0.049	0.374	0.325	5.6	0.859135	0.4	0.5	503	166	275	79
130RC	F	Cre-	203	107	3474	Dark	43752.2	4095.24	21.163	20.994	0.168	3.6	3197.02	0.045	0.292	0.247	5.2	0.780666	0.3	0.5	626	70	252	52
130RC	F	Cre-	99	107	1602	Dark	43750.9	4093.11	21.163	20.845	0.318	1.7	3269.96	0.042	0.415	0.373	2.5	0.798894	0.5	0.5	2137	1483	1371	673
130RC	F	Cre-	84	107	1332	Light	43750.7	4087.99	21.163	20.951	0.212	1.4	3473.27	0.039	0.332	0.293	2.1	0.849628	0.3	0.5	533	184	487	162
130RC	F	Cre-	276	107	4788	Dark	43753.1	4075.27	21.163	20.967	0.196	4.7	3318.05	0.046	0.315	0.269	7	0.814193	0.3	0.5	327	68	319	59
130RC	F	Cre-	124	107	2052	Dark	43751.2	4066.05	21.163	20.984	0.179	2.2	3181.35	0.041	0.296	0.255	3.1	0.782416	0.3	0.5	159	32	73	25
130RC	F	Cre-	31	107	378	Dark	43750.1	4049.96	21.163	20.868	0.295	0.5	3262.25	0.045	0.401	0.356	0.8	0.805501	0.5	0.5	1340	860	990	431
130RC	F	Cre-	254	107	4392	Dark	43752.9	4049.56	21.163	21.005	0.158	4.3	3008.71	0.042	0.252	0.21	6.4	0.742972	0.2	0.5	5	0	13	0
130RC	F	Cre-	183	107	3114	Dark	43752	4022.45	21.163	20.934	0.229	3.1	3069.88	0.042	0.309	0.267	4.7	0.763186	0.3	0.5	1282	529	1109	338
130RC	F	Cre-	290	107	5040	Light	43753.3	4017	21.162	20.99	0.172	5	3062.43	0.049	0.277	0.228	7.4	0.762366	0.3	0.5	15	3	22	11
130RC	F	Cre-	152	107	2556	Light	43751.6	4004.81	21.163	20.926	0.238	2.6	3051.47	0.041	0.337	0.297	3.9	0.761952	0.4	0.5	176	80	173	53
130RC	F	Cre-	73	107	1134	Light	43750.6	3975.94	21.163	21.003	0.16	1.2	2974.92	0.04	0.276	0.236	1.8	0.74823	0.2	0.5	125	10	156	15
130RC	F	Cre-	291	107	5058	Light	43753.3	3974.44	21.162	20.919	0.243	5	3062.79	0.05	0.372	0.322	7.5	0.770623	0.4	0.5	604	300	526	183
130RC	F	Cre-	159	107	2682	Light	43751.7	3974.08	21.163	21.005	0.158	2.7	3020.31	0.04	0.285	0.245	4	0.760004	0.2	0.5	310	102	215	41
130RC	F	Cre-	277	107	4806	Dark	43753.1	3962.66	21.163	20.893	0.27	4.8	3035.12	0.046	0.384	0.338	7.1	0.765928	0.4	0.5	367	187	408	102
130RC	F	Cre-	96	107	1548	Dark	43750.9	3958.46	21.163	20.899	0.265	1.6	3206.17	0.041	0.378	0.337	2.4	0.809954	0.4	0.5	769	307	545	206
130RC	F	Cre-	197	107	3366	Dark	43752.1	3956.86	21.163	20.905	0.258	3.5	2976.05	0.045	0.366	0.321	5	0.752124	0.4	0.5	1168	589	820	299
130RC	F	Cre-	33	107	414	Dark	43750.1	3937.81	21.163	20.906	0.256	0.6	3193.69	0.046	0.365	0.32	0.8	0.811031	0.4	0.5	810	353	646	266
130RC	F	Cre-	68	107	1044	Light	43750.5	3932.58	21.163	20.915	0.249	1.2	3234.27	0.04	0.357	0.317	1.7	0.822429	0.4	0.5	397	162	266	97
130RC	F	Cre-	213	107	3654	Light	43752.3	3911.2	21.163	20.953	0.209	3.8	3282.45	0.047	0.292	0.245	5.5	0.839245	0.3	0.5	87	36	110	32
130RC	F	Cre-	224	107	3852	Light	43752.5	3906.64	21.163	21.017	0.145	3.9	3347.16	0.045	0.283	0.238	5.7	0.856787	0.2	0.5	494	80	439	67
130RC	F	Cre-	65	107	990	Light	43750.5	3896.74	21.163	20.97	0.194	1.1	3174.43	0.041	0.307	0.266	1.6	0.814637	0.3	0.5	431	118	481	145
130RC	F	Cre-	95	107	1530	Dark	43750.9	3889.81	21.163	21.001	0.162	1.6	3217	0.041	0.278	0.237	2.3	0.827035	0.3	0.5	47	7	19	9
130RC	F	Cre-	225	107	3870	Light	43752.5	3882.45	21.163	21.022	0.141	3.9	3334.95	0.042	0.28	0.239	5.7	0.858981	0.2	0.5	30	8	19	8
130RC	F	Cre-	54	107	792	Light	43750.4	3881.18	21.163	20.874	0.289	0.9	3106.02	0.045	0.399	0.354	1.3	0.800277	0.4	0.5	165	114	116	50
130RC	F	Cre-	145	107	2430	Light	43751.5	3879.96	21.163	20.961	0.203	2.5	3295.82	0.041	0.343	0.303	3.7	0.849446	0.3	0.5	529	247	568	176
130RC	F	Cre-	155	107	2610	Light	43751.6	3875.22	21.163	20.908	0.256	2.7	3185.28	0.041	0.391	0.351	3.9	0.821962	0.4	0.5	608	83	583	105
130RC	F	Cre-	122	107	2016	Dark	43751.2	3866.18	21.163	20.913	0.25	2.2	3341.36	0.042	0.367	0.326	3.1	0.864252	0.4	0.5	599	243	604	178
130RC	F	Cre-	212	107	3636	Light	43752.3	3862.64	21.163	20.91	0.253	3.7	3128.25	0.048	0.322	0.274	5.4	0.809872	0.4	0.5	532	144	562	147
130RC	F	Cre-	92	107	1476	Dark	43750.8	3858.62	21.163	21.007	0.156	1.5	2872	0.041	0.254	0.213	2.3	0.744307	0.2	0.5	6	0	4	0
130RC	F	Cre-	271	107	4698	Dark	43753.1	3854.06	21.163	20.906	0.256	4.6	2930.84	0.046	0.375	0.329	6.9	0.760455	0.4	0.5	2566	1866	1698	963
130RC	F	Cre-	82	107	1296	Light	43750.7	3841.74	21.163	21.006	0.157	1.4	3181.93	0.039	0.267	0.228	2	0.828252	0.2	0.5	63	1	2	1
130RC	F	Cre-	100	107	1620	Dark	43750.9	3840.08	21.163	20.891	0.272	1.7	3082.61	0.043	0.355	0.312	2.5	0.802746	0.4	0.5	1244	631	1016	334
130RC	F	Cre-	223	107	3834	Light	43752.5	3837.33	21.163	20.928	0.235	3.9	3306.14	0.045	0.342	0.297	5.7	0.861571	0.4	0.5	244	110	177	67
130RC	F	Cre-	41	107	558	Dark	43750.2	3834.92	21.163	20.944	0.218	0.7	3087.16	0.046	0.324	0.278	1	0.805014	0.3	0.5	152	46	136	36
130RC	F	Cre-	120	107	1980	Dark	43751.2	3833.03	21.163	20.963	0.2	2.1	3293.91	0.042	0.303	0.262	3	0.859351	0.3	0.5	815	278	927	235
130RC	F	Cre-	234	107	4032	Light	43752.6	3826.01	21.163	21.041	0.122	4	2866.88	0.04	0.262	0.222	5.9	0.749313	0.2	0.5	25	7	28	9
130RC	F	Cre-	164	107	2772	Light	43751.7	3824.19	21.163	20.902	0.262	2.8	3107.02	0.04	0.385	0.345	4.2	0.812464	0.4	0.5	1033	516	912	384
130RC	F	Cre-	275	107	4770	Dark	43753.1	3822.08	21.163	20.906	0.257	4.7	3130.34	0.047	0.378	0.332	7	0.819014	0.4	0.5	1088	605	876	381
130RC	F	Cre-	167	107	2826	Light	43751.8	3818.9	21.163	21.006	0.157	2.9	3322.58	0.04	0.275	0.235	4.2	0.870035	0.2	0.5	22	5	18	7
130RC	F	Cre-	134	107	2232	Light	43751.4	3818.06	21.163	20.912	0.251	2.4	2973.92	0.041	0.385	0.344	3.4	0.778907	0.4	0.5	676	259	391	118
130RC	F	Cre-	14	107	72	Dark	43749.9	3814.07	21.163	20.972	0.191	0.2	3280.21	0.041	0.299	0.258	0.3	0.860029	0.3	0.5	608	210	395	122
130RC	F	Cre-	158	107	2664	Light	43751.7	3806.8	21.163	20.911	0.252	2.7	3147.64	0.04	0.362	0.322	4	0.826848	0.4	0.5	351	147	346	121
130RC	F	Cre-	94	107	1512	Dark	43750.9	3805.61	21.163	20.973	0.19	1.6	2917.92	0.041	0.311	0.27	2.3	0.766742	0.3	0.5	612	283	560	186
130RC	F	Cre-	252	107	4356	Dark	43752.8	3801.67	21.163	20.92	0.243	4.3	2848.89	0.042	0.374	0.332	6.4	0.749379	0.4	0.5	1727	1138	1138	554
130RC	F	Cre-	146	107	2448	Light	43751.5	3797.25	21.163	20.987	0.176	2.5	3223.38	0.04	0.317	0.277	3.7	0.848873	0.3	0.5	48	24	129	19
130RC	F	Cre-	138	107	2304	Light	43751.4	3792.14	21.163	21.024	0.139	2.4	3112.61	0.041	0.288	0.247	3.5	0.820804	0.2	0.5	72	14	47	16
130RC	F	Cre-	22	107	216	Dark	43750	3783.46	21.163	20.981	0.182	0.4	3071.44	0.044	0.295	0.251	0.5	0.811806	0.3	0.5	101	67	66	26
130RC	F	Cre-	222	107	3816	Light	43752.5	3779.58	21.163	21.016	0.147	3.9	3192.36	0.047	0.256	0.209	5.7	0.844633	0.2	0.5	43	7	18	2
130RC	F	Cre-	180	107	3060	Dark	43751.9	3778.93	21.163	20.86	0.303	3.1	2856.73	0.042	0.422	0.38	4.6	0.755965	0.5	0.5	2494	1732	1668	766
130RC	F	Cre-	227	107	3906	Light	43752.5	3776.81	21.163	21.035	0.128	4	2846.92	0.041	0.26	0.22	5.8	0.753789	0.2	0.5	148	89	139	73
130RC	F	Cre-	163	107	2754	Light	43751.7	3776.61	21.163	20.899	0.264	2.8	3215.03	0.041	0.384	0.343	4.1	0.851301	0.4	0.5	801	371	492	183
130RC	F	Cre-	250	107	4320	Dark	43752.8	3772.46	21.163	20.93	0.233	4.2	3147	0.041	0.347	0.306	6.3	0.834203	0.4	0.5	664	251	540	134
130RC	F	Cre-	172	107	2916	Dark	43751.8	3765.59	21.163	20.908	0.255	2.9	2943.75	0.04	0.393	0.353	4.3	0.781751	0.4	0.5	840	300	799	219
130RC	F	Cre-	295	107	5130	Light	43753.4	3757.58	21.162	21.012	0.151	5.1	2905.11	0.05	0.306	0.257	7.5	0.773134	0.2	0.5	52	11	20	7
130RC	F	Cre-	166	107	2808	Light	43751.8	3753.57	21.163	20.952	0.211	2.8	2827.3	0.04	0.311	0.271	4.2	0.753231	0.3	0.5	132	63	90	41
130RC	F	Cre-	195	107	3330	Dark	43752.1	3752.93	21.163	20.902	0.261	3.4	3320.9	0.045	0.357	0.312	5	0.884884	0.4	0.5	1508	1082	1138	565
130RC	F	Cre-	3	107	NA	NA	43749.7	3747.97	21.163	20.995	0.168	0	3169.49	0.039	0.264	0.225	0	0.845655	0.3	0.5	526	289	257	116
130RC	F	Cre-	30	107	360	Dark	43750.1	3743.89	21.163	20.915	0.248	0.5	3070.1	0.046	0.359	0.312	0.7	0.82003	0.4	0.5	1602	909	1149	491
130RC	F	Cre-	130	107	2160	Light	43751.3	3740.88	21.163	20.99	0.173	2.3	3240.45	0.041	0.309	0.268	3.3	0.866227	0.3	0.5	54	8	128	21
130RC	F	Cre-	196	107	3348	Dark	43752.1	3738.42	21.163	20.922	0.241	3.4	3545.26	0.045	0.33	0.286	5	0.948333	0.4	0.5	1271	710	1045	444
130RC	F	Cre-	57	107	846	Light	43750.4	3735.25	21.163	20.979	0.184	1	2790.47	0.044	0.299	0.255	1.4	0.747063	0.3	0.5	123	67	56	28
130RC	F	Cre-	191	107	3258	Dark	43752.1	3733.86	21.163	20.9	0.262	3.3	2812.46	0.044	0.336	0.292	4.9	0.75323	0.4	0.5	1503	790	1161	442
130RC	F	Cre-	48	107	684	Dark	43750.3	3733.42	21.163	21.007	0.156	0.8	3260.72	0.044	0.276	0.232	1.2	0.873387	0.2	0.5	141	44	81	30
130RC	F	Cre-	85	107	1350	Light	43750.7	3732.85	21.163	20.979	0.184	1.4	2880.52	0.04	0.299	0.259	2.1	0.771667	0.3	0.5	17	8	18	9
130RC	F	Cre-	206	107	3528	Dark	43752.3	3731.94	21.163	21.003	0.16	3.6	2917.01	0.043	0.288	0.244	5.3	0.781633	0.2	0.5	25	5	13	3
130RC	F	Cre-	113	107	1854	Dark	43751.1	3729.71	21.163	20.976	0.187	2	3221.02	0.042	0.309	0.266	2.8	0.863609	0.3	0.5	510	262	466	128
130RC	F	Cre-	144	107	2412	Light	43751.5	3729.15	21.163	21.018	0.145	2.5	3097.79	0.041	0.281	0.241	3.7	0.830697	0.2	0.5	2	0	8	0
130RC	F	Cre-	182	107	3096	Dark	43752	3724.32	21.163	20.876	0.287	3.1	2769.61	0.042	0.36	0.318	4.6	0.743657	0.4	0.5	2552	1674	1633	853
130RC	F	Cre-	228	107	3924	Light	43752.5	3721.03	21.163	21.036	0.128	4	2868.56	0.04	0.247	0.207	5.8	0.770907	0.2	0.5	28	4	56	8
130RC	F	Cre-	143	107	2394	Light	43751.5	3720.1	21.163	21.006	0.157	2.5	3345.56	0.041	0.301	0.261	3.6	0.899317	0.2	0.5	103	25	256	26
130RC	F	Cre-	83	107	1314	Light	43750.7	3705.45	21.163	20.915	0.249	1.4	3128.95	0.039	0.359	0.321	2	0.844418	0.4	0.5	253	92	199	59
130RC	F	Cre-	81	107	1278	Light	43750.7	3704.8	21.163	20.988	0.175	1.4	3218.44	0.039	0.29	0.251	2	0.868722	0.3	0.5	66	21	33	17
130RC	F	Cre-	269	107	4662	Dark	43753	3699.44	21.163	20.868	0.294	4.6	3075.47	0.045	0.432	0.386	6.8	0.831334	0.5	0.5	2366	1723	1576	846
130RC	F	Cre-	128	107	2124	Dark	43751.3	3685.44	21.163	20.943	0.22	2.3	3001.65	0.041	0.364	0.323	3.2	0.814463	0.3	0.5	162	58	129	39
130RC	F	Cre-	246	107	4248	Light	43752.8	3678.1	21.163	21.002	0.162	4.2	3637.47	0.041	0.27	0.229	6.2	0.988954	0.2	0.5	149	16	247	43
130RC	F	Cre-	263	107	4554	Dark	43753	3675.01	21.163	20.889	0.273	4.5	2860.49	0.045	0.415	0.369	6.6	0.778362	0.4	0.5	500	106	686	127
130RC	F	Cre-	179	107	3042	Dark	43751.9	3673.99	21.163	20.873	0.29	3	3378.44	0.042	0.419	0.377	4.5	0.919556	0.4	0.5	3179	2365	2184	1242
130RC	F	Cre-	28	107	324	Dark	43750	3670.49	21.163	20.928	0.235	0.5	3044.18	0.045	0.356	0.312	0.7	0.829367	0.4	0.5	1156	556	880	291
130RC	F	Cre-	260	107	4500	Dark	43752.9	3667.24	21.163	20.99	0.172	4.4	3133.03	0.045	0.317	0.272	6.6	0.854328	0.3	0.5	33	6	28	9
130RC	F	Cre-	248	107	4284	Light	43752.8	3666.79	21.163	21.016	0.147	4.2	2876.68	0.042	0.267	0.226	6.3	0.784521	0.2	0.5	23	0	17	7
130RC	F	Cre-	262	107	4536	Dark	43753	3663.17	21.163	20.858	0.305	4.4	2753.27	0.044	0.445	0.401	6.6	0.751608	0.5	0.5	2373	1590	1709	839
130RC	F	Cre-	129	107	2142	Dark	43751.3	3656.28	21.163	20.917	0.246	2.3	3245.09	0.041	0.387	0.346	3.3	0.887539	0.4	0.5	1152	575	865	370
130RC	F	Cre-	188	107	3204	Dark	43752	3653.87	21.163	20.862	0.301	3.3	3506.39	0.042	0.396	0.353	4.8	0.959637	0.5	0.5	2632	1899	1902	928
130RC	F	Cre-	67	107	1026	Light	43750.5	3650.32	21.163	20.996	0.167	1.1	3119.52	0.041	0.273	0.233	1.6	0.85459	0.3	0.5	28	11	27	6
130RC	F	Cre-	8	107	NA	NA	43749.8	3648.57	21.163	20.876	0.287	0.1	3085.49	0.039	0.379	0.339	0.2	0.845672	0.4	0.5	894	477	536	245
130RC	F	Cre-	237	107	4086	Light	43752.6	3648.08	21.163	20.967	0.197	4.1	3024.82	0.04	0.334	0.294	6	0.829153	0.3	0.5	320	45	370	69
130RC	F	Cre-	266	107	4608	Dark	43753	3647.74	21.163	20.851	0.312	4.5	2904.35	0.045	0.461	0.416	6.7	0.796205	0.5	0.5	1344	721	903	407
130RC	F	Cre-	119	107	1962	Dark	43751.2	3645.7	21.163	20.858	0.305	2.1	3188.15	0.042	0.409	0.367	3	0.874494	0.5	0.5	2789	1891	1646	825
130RC	F	Cre-	77	107	1206	Light	43750.6	3645.29	21.163	20.885	0.278	1.3	2943.25	0.039	0.388	0.348	1.9	0.807413	0.4	0.5	436	233	363	131
130RC	F	Cre-	192	107	3276	Dark	43752.1	3643.79	21.163	20.883	0.28	3.4	3072.21	0.044	0.356	0.311	4.9	0.843138	0.4	0.5	2980	2182	2106	1169
130RC	F	Cre-	170	107	2880	Dark	43751.8	3642.54	21.163	21.005	0.158	2.9	2893.07	0.04	0.284	0.244	4.3	0.794243	0.2	0.5	32	9	27	8
130RC	F	Cre-	71	107	1098	Light	43750.6	3640.97	21.163	21.001	0.162	1.2	3185.31	0.04	0.276	0.235	1.7	0.87485	0.3	0.5	77	50	82	41
130RC	F	Cre-	45	107	630	Dark	43750.2	3640.18	21.163	20.855	0.307	0.8	3103.56	0.046	0.424	0.377	1.1	0.852584	0.5	0.5	704	204	610	183
130RC	F	Cre-	149	107	2502	Light	43751.5	3638.16	21.163	20.898	0.265	2.6	3127.43	0.041	0.379	0.339	3.8	0.85962	0.4	0.5	178	81	329	74
130RC	F	Cre-	226	107	3888	Light	43752.5	3637.62	21.163	21.023	0.14	3.9	2855.24	0.041	0.278	0.237	5.8	0.78492	0.2	0.5	18	8	19	7
130RC	F	Cre-	75	107	1170	Light	43750.6	3635.93	21.163	20.921	0.243	1.3	2758.12	0.039	0.348	0.309	1.8	0.758573	0.4	0.5	560	44	488	61
130RC	F	Cre-	285	107	4950	Dark	43753.2	3634.06	21.163	20.991	0.171	4.9	2878.23	0.046	0.304	0.258	7.3	0.792014	0.3	0.5	233	47	168	42
130RC	F	Cre-	17	107	126	Dark	43749.9	3631.12	21.163	20.951	0.212	0.3	3155.67	0.043	0.333	0.29	0.4	0.869064	0.3	0.5	269	142	184	73
130RC	F	Cre-	79	107	1242	Light	43750.7	3628.27	21.163	20.911	0.252	1.3	2977.58	0.039	0.363	0.324	1.9	0.820661	0.4	0.5	781	257	744	227
130RC	F	Cre-	26	107	288	Dark	43750	3627.68	21.163	20.874	0.289	0.4	2956.27	0.045	0.402	0.357	0.6	0.814921	0.4	0.5	1368	711	911	369
130RC	F	Cre-	44	107	612	Dark	43750.2	3620.15	21.163	21.001	0.161	0.8	3200.45	0.046	0.27	0.224	1.1	0.884066	0.2	0.5	106	57	56	25
130RC	F	Cre-	245	107	4230	Light	43752.7	3618.32	21.163	20.961	0.202	4.2	2778.11	0.041	0.344	0.303	6.2	0.767792	0.3	0.5	697	263	673	230
130RC	F	Cre-	133	107	2214	Light	43751.3	3605.86	21.163	20.92	0.243	2.4	2929.63	0.041	0.378	0.337	3.4	0.812466	0.4	0.5	531	63	530	69
130RC	F	Cre-	2	107	NA	NA	43749.7	3605.09	21.163	20.937	0.226	0	2967.1	0.039	0.309	0.27	0	0.82303	0.3	0.5	416	191	244	104
130RC	F	Cre-	117	107	1926	Dark	43751.1	3603.7	21.163	20.987	0.176	2.1	2823.3	0.041	0.304	0.263	2.9	0.783446	0.3	0.5	35	13	46	11
130RC	F	Cre-	293	107	5094	Light	43753.3	3601.13	21.162	21.011	0.151	5	3079.45	0.051	0.271	0.22	7.5	0.855135	0.2	0.5	17	5	22	6
130RC	F	Cre-	177	107	3006	Dark	43751.9	3593.81	21.163	20.997	0.166	3	3238.15	0.042	0.296	0.254	4.5	0.901036	0.3	0.5	132	50	101	24
130RC	F	Cre-	24	107	252	Dark	43750	3587.59	21.163	20.878	0.285	0.4	3072.96	0.045	0.413	0.368	0.6	0.856553	0.4	0.5	735	128	511	99
130RC	F	Cre-	39	107	522	Dark	43750.2	3587.14	21.163	20.982	0.181	0.7	2881.26	0.045	0.285	0.241	1	0.803218	0.3	0.5	57	22	30	13
130RC	F	Cre-	25	107	270	Dark	43750	3579.76	21.162	20.881	0.281	0.4	3090.48	0.045	0.39	0.346	0.6	0.863319	0.4	0.5	1702	991	1140	592
130RC	F	Cre-	105	107	1710	Dark	43751	3579.5	21.163	20.892	0.271	1.8	2969.73	0.044	0.338	0.294	2.6	0.82965	0.4	0.5	1314	639	1033	324
130RC	F	Cre-	51	107	738	Light	43750.3	3578.29	21.163	20.997	0.166	0.9	3123.19	0.045	0.28	0.235	1.3	0.872815	0.3	0.5	41	9	41	21
130RC	F	Cre-	201	107	3438	Dark	43752.2	3577.42	21.163	20.839	0.324	3.5	3267.86	0.045	0.439	0.394	5.2	0.91347	0.5	0.5	3815	3074	2538	1518
130RC	F	Cre-	111	107	1818	Dark	43751.1	3572.83	21.163	20.986	0.177	2	2974.76	0.042	0.28	0.238	2.8	0.832606	0.3	0.5	666	239	562	153
130RC	F	Cre-	55	107	810	Light	43750.4	3571.4	21.162	20.934	0.229	1	3145.25	0.051	0.352	0.3	1.4	0.880677	0.4	0.5	338	139	290	90
130RC	F	Cre-	40	107	540	Dark	43750.2	3570.78	21.163	21.013	0.15	0.7	3135.23	0.045	0.26	0.214	1	0.878024	0.2	0.5	68	22	30	9
130RC	F	Cre-	249	107	4302	Light	43752.8	3568.44	21.163	21.022	0.141	4.2	3078.31	0.042	0.251	0.209	6.3	0.862647	0.2	0.5	23	4	19	4
130RC	F	Cre-	198	107	3384	Dark	43752.2	3567.52	21.163	21.009	0.154	3.5	2844.35	0.045	0.274	0.229	5.1	0.79729	0.2	0.5	8	2	55	4
130RC	F	Cre-	199	107	3402	Dark	43752.2	3566.4	21.163	21.023	0.14	3.5	2942.63	0.045	0.254	0.209	5.1	0.825098	0.2	0.5	118	65	62	26
130RC	F	Cre-	107	107	1746	Dark	43751	3556.18	21.163	20.886	0.277	1.9	3369.96	0.043	0.375	0.332	2.7	0.947634	0.4	0.5	1691	914	1253	511
130RC	F	Cre-	274	107	4752	Dark	43753.1	3553.4	21.163	20.906	0.256	4.7	3338.45	0.046	0.379	0.333	7	0.939508	0.4	0.5	1883	1306	1555	766
130RC	F	Cre-	281	107	4878	Dark	43753.2	3544.74	21.163	20.929	0.233	4.8	2842.46	0.047	0.368	0.321	7.2	0.801882	0.4	0.5	287	67	369	79
130RC	F	Cre-	90	107	1440	Dark	43750.8	3539.11	21.163	20.888	0.275	1.5	3052.03	0.041	0.396	0.355	2.2	0.862373	0.4	0.5	1003	309	1018	189
130RC	F	Cre-	151	107	2538	Light	43751.6	3538.68	21.163	21.019	0.144	2.6	3254.83	0.042	0.258	0.215	3.8	0.919787	0.2	0.5	59	17	117	18
130RC	F	Cre-	125	107	2070	Dark	43751.2	3533.91	21.163	21.006	0.157	2.2	3206.65	0.041	0.283	0.242	3.2	0.907396	0.2	0.5	20	4	51	7
130RC	F	Cre-	78	107	1224	Light	43750.7	3524.02	21.163	20.888	0.275	1.3	2799.17	0.039	0.386	0.347	1.9	0.794312	0.4	0.5	837	450	735	280
130RC	F	Cre-	241	107	4158	Light	43752.7	3522.5	21.163	21.034	0.129	4.1	3243.88	0.04	0.276	0.236	6.1	0.920903	0.2	0.5	37	13	40	12
130RC	F	Cre-	72	107	1116	Light	43750.6	3522.32	21.163	20.917	0.246	1.2	2990.82	0.04	0.362	0.321	1.8	0.849105	0.4	0.5	347	88	305	72
130RC	F	Cre-	243	107	4194	Light	43752.7	3517.92	21.163	20.987	0.176	4.1	3034.08	0.041	0.317	0.276	6.2	0.862465	0.3	0.5	152	43	185	36
130RC	F	Cre-	193	107	3294	Dark	43752.1	3513.74	21.163	20.93	0.233	3.4	2790.32	0.045	0.316	0.272	4.9	0.794119	0.4	0.5	1279	667	995	408
130RC	F	Cre-	233	107	4014	Light	43752.6	3512.69	21.163	21.031	0.132	4	3130.94	0.04	0.27	0.23	5.9	0.891323	0.2	0.5	117	55	96	22
130RC	F	Cre-	270	107	4680	Dark	43753.1	3510.38	21.163	20.931	0.232	4.6	2705.57	0.046	0.357	0.31	6.9	0.770734	0.4	0.5	1348	691	1138	410
130RC	F	Cre-	174	107	2952	Dark	43751.9	3501.79	21.163	20.987	0.176	3	3067.13	0.041	0.309	0.268	4.4	0.875877	0.3	0.5	89	11	153	28
130RC	F	Cre-	157	107	2646	Light	43751.6	3501.69	21.163	20.995	0.168	2.7	3093.61	0.04	0.29	0.249	4	0.883464	0.3	0.5	32	11	39	13
130RC	F	Cre-	89	107	1422	Light	43750.8	3493.56	21.163	21.003	0.161	1.5	3449.41	0.041	0.274	0.233	2.2	0.987363	0.2	0.5	33	14	32	16
130RC	F	Cre-	297	107	5166	Light	43753.4	3479.73	21.162	20.913	0.249	5.1	2882.4	0.05	0.383	0.332	7.6	0.828339	0.4	0.5	1069	336	794	232
130RC	F	Cre-	156	107	2628	Light	43751.6	3474.27	21.163	20.999	0.165	2.7	3104.78	0.041	0.298	0.257	4	0.89365	0.3	0.5	13	6	34	8
130RC	F	Cre-	5	107	NA	NA	43749.7	3474.08	21.163	21.02	0.144	0.1	3151.64	0.039	0.234	0.195	0.1	0.907184	0.2	0.5	695	244	598	207
130RC	F	Cre-	19	107	162	Dark	43749.9	3473.02	21.163	20.918	0.245	0.3	2832.47	0.044	0.365	0.321	0.4	0.815563	0.4	0.5	536	173	662	183
130RC	F	Cre-	284	107	4932	Dark	43753.2	3465.64	21.163	20.933	0.23	4.9	2899.01	0.047	0.361	0.314	7.3	0.836502	0.4	0.5	1750	1165	1613	729
130RC	F	Cre-	283	107	4914	Dark	43753.2	3461.42	21.163	20.908	0.255	4.9	3275.94	0.047	0.38	0.334	7.2	0.946417	0.4	0.5	576	264	443	158
130RC	F	Cre-	273	107	4734	Dark	43753.1	3461.13	21.163	20.879	0.283	4.7	3489.9	0.045	0.365	0.32	7	1.00831	0.4	0.5	2154	1461	1606	757
130RC	F	Cre-	178	107	3024	Dark	43751.9	3458.24	21.163	20.871	0.292	3	3130.73	0.042	0.427	0.384	4.5	0.905295	0.4	0.5	810	380	681	216
130RC	F	Cre-	136	107	2268	Light	43751.4	3458.06	21.163	21.004	0.159	2.4	2952.92	0.041	0.304	0.263	3.5	0.853922	0.2	0.5	98	22	75	16
130RC	F	Cre-	123	107	2034	Dark	43751.2	3457.13	21.163	20.978	0.186	2.2	2793.95	0.042	0.298	0.257	3.1	0.808169	0.3	0.5	97	20	64	13
130RC	F	Cre-	208	107	3564	Dark	43752.3	3456.91	21.163	21.032	0.131	3.7	3449	0.045	0.255	0.211	5.3	0.997712	0.2	0.5	22	3	9	3
130RC	F	Cre-	15	107	90	Dark	43749.9	3453.83	21.163	20.992	0.171	0.2	3200.05	0.042	0.287	0.245	0.3	0.926523	0.3	0.5	507	194	347	129
130RC	F	Cre-	209	107	3582	Dark	43752.3	3450.77	21.163	20.924	0.239	3.7	2691.05	0.046	0.363	0.317	5.4	0.779842	0.4	0.5	325	32	139	43
130RC	F	Cre-	9	107	NA	NA	43749.8	3447.9	21.163	20.97	0.193	0.1	3117.18	0.04	0.283	0.244	0.2	0.904081	0.3	0.5	771	214	492	101
130RC	F	Cre-	207	107	3546	Dark	43752.3	3445.97	21.163	20.96	0.203	3.6	2744.32	0.043	0.327	0.283	5.3	0.796385	0.3	0.5	111	80	121	57
130RC	F	Cre-	86	107	1368	Light	43750.8	3438.23	21.163	20.993	0.17	1.4	2965.12	0.04	0.288	0.248	2.1	0.862397	0.3	0.5	60	20	30	10
130RC	F	Cre-	148	107	2484	Light	43751.5	3435.91	21.163	21.004	0.159	2.6	3294.5	0.041	0.284	0.243	3.8	0.958844	0.2	0.5	40	17	64	21
130RC	F	Cre-	173	107	2934	Dark	43751.8	3435.21	21.163	20.926	0.237	2.9	2782.86	0.041	0.37	0.329	4.4	0.8101	0.4	0.5	1033	471	953	288
130RC	F	Cre-	272	107	4716	Dark	43753.1	3434.78	21.163	20.873	0.289	4.7	2840.5	0.045	0.377	0.332	6.9	0.826981	0.4	0.5	2351	1644	1628	894
130RC	F	Cre-	210	107	3600	Light	43752.3	3431.59	21.163	20.9	0.263	3.7	3184.87	0.047	0.365	0.318	5.4	0.928103	0.4	0.5	2089	1421	1529	712
130RC	F	Cre-	126	107	2088	Dark	43751.3	3429.36	21.163	20.914	0.249	2.2	2761.02	0.041	0.38	0.339	3.2	0.805113	0.4	0.5	160	25	295	41
130RC	F	Cre-	42	107	576	Dark	43750.2	3428.59	21.163	20.986	0.177	0.7	3075.3	0.046	0.293	0.247	1	0.896958	0.3	0.5	507	216	406	111
130RC	F	Cre-	211	107	3618	Light	43752.3	3428.24	21.163	20.929	0.234	3.7	3382.09	0.048	0.322	0.274	5.4	0.986538	0.4	0.5	2035	1472	1355	695
130RC	F	Cre-	141	107	2358	Light	43751.4	3425.17	21.163	20.874	0.289	2.5	3340.8	0.041	0.436	0.394	3.6	0.975367	0.4	0.5	1009	424	687	241
130RC	F	Cre-	268	107	4644	Dark	43753	3416.9	21.163	20.908	0.255	4.6	3037.9	0.046	0.397	0.351	6.8	0.889081	0.4	0.5	1334	761	1034	440
130RC	F	Cre-	131	107	2178	Light	43751.3	3409.46	21.163	21.003	0.16	2.3	3002.53	0.041	0.298	0.257	3.3	0.880646	0.2	0.5	62	2	56	4
130RC	F	Cre-	27	107	306	Dark	43750	3408.68	21.163	20.888	0.275	0.5	3157.7	0.045	0.39	0.345	0.6	0.92637	0.4	0.5	990	431	669	273
130RC	F	Cre-	187	107	3186	Dark	43752	3408.5	21.163	20.868	0.295	3.2	3166.12	0.044	0.358	0.315	4.8	0.92889	0.4	0.5	2873	2138	1818	980
130RC	F	Cre-	4	107	NA	NA	43749.7	3408.39	21.163	20.917	0.246	0.1	3474.13	0.039	0.316	0.277	0.1	1.01929	0.4	0.5	701	298	432	155
130RC	F	Cre-	49	107	702	Dark	43750.3	3407.81	21.163	20.873	0.29	0.8	3027.2	0.045	0.409	0.364	1.2	0.888312	0.4	0.5	698	315	550	221
130RC	F	Cre-	161	107	2718	Light	43751.7	3404.8	21.163	21.018	0.145	2.8	2920.78	0.04	0.269	0.229	4.1	0.857843	0.2	0.5	25	1	20	8
130RC	F	Cre-	186	107	3168	Dark	43752	3404.54	21.163	20.88	0.283	3.2	2981.41	0.043	0.358	0.316	4.7	0.875716	0.4	0.5	3069	2215	2097	1076
130RC	F	Cre-	176	107	2988	Dark	43751.9	3402.83	21.163	21.032	0.131	3	2861.96	0.042	0.278	0.237	4.4	0.841052	0.2	0.5	42	13	19	1
130RC	F	Cre-	102	107	1656	Dark	43751	3400.6	21.163	20.866	0.297	1.8	3078.98	0.043	0.352	0.309	2.5	0.905424	0.5	0.5	2209	1300	1379	639
130RC	F	Cre-	264	107	4572	Dark	43753	3392.78	21.163	20.901	0.262	4.5	3449	0.044	0.395	0.351	6.7	1.01657	0.4	0.5	229	100	156	37
130RC	F	Cre-	1	107	NA	NA	43749.7	3386.71	21.163	20.994	0.169	0	2793.02	0.044	0.259	0.214	0	0.8247	0.3	0.5	468	236	375	140
130RC	F	Cre-	76	107	1188	Light	43750.6	3375.53	21.163	21.001	0.162	1.3	2804.5	0.039	0.264	0.225	1.9	0.830832	0.2	0.5	23	9	15	7
130RC	F	Cre-	150	107	2520	Light	43751.6	3372	21.163	20.938	0.225	2.6	3159.54	0.042	0.348	0.306	3.8	0.936993	0.3	0.5	746	220	807	202
130RC	F	Cre-	184	107	3132	Dark	43752	3370.08	21.163	20.88	0.283	3.2	2808.58	0.042	0.383	0.341	4.7	0.833386	0.4	0.5	2170	1563	1564	769
130RC	F	Cre-	279	107	4842	Dark	43753.2	3369.33	21.163	20.894	0.268	4.8	2707.09	0.047	0.397	0.35	7.1	0.803451	0.4	0.5	2114	1466	1568	778
130RC	F	Cre-	110	107	1800	Dark	43751.1	3366.19	21.163	20.895	0.268	1.9	2889.72	0.042	0.358	0.315	2.8	0.858455	0.4	0.5	1548	942	1120	507
130RC	F	Cre-	185	107	3150	Dark	43752	3364.82	21.163	20.895	0.269	3.2	3026.18	0.042	0.349	0.307	4.7	0.899358	0.4	0.5	1405	837	1194	478
130RC	F	Cre-	140	107	2340	Light	43751.4	3361.71	21.163	21.035	0.129	2.4	2903.68	0.041	0.278	0.237	3.5	0.863751	0.2	0.5	21	4	13	3
130RC	F	Cre-	109	107	1782	Dark	43751	3361.37	21.163	20.884	0.279	1.9	3034.96	0.042	0.347	0.305	2.7	0.902895	0.4	0.5	1051	365	973	336
130RC	F	Cre-	240	107	4140	Light	43752.7	3358.89	21.163	21.025	0.138	4.1	3255.01	0.04	0.284	0.244	6.1	0.969073	0.2	0.5	33	12	31	13
130RC	F	Cre-	220	107	3780	Light	43752.4	3356.03	21.163	20.936	0.227	3.9	3049.88	0.046	0.367	0.321	5.6	0.908775	0.4	0.5	768	386	588	254
130RC	F	Cre-	137	107	2286	Light	43751.4	3350.88	21.163	20.971	0.192	2.4	3150.45	0.041	0.332	0.291	3.5	0.940187	0.3	0.5	122	19	102	22
130RC	F	Cre-	135	107	2250	Light	43751.4	3349.08	21.163	21.018	0.145	2.4	2634.95	0.046	0.289	0.243	3.4	0.786768	0.2	0.5	89	33	86	38
130RC	F	Cre-	194	107	3312	Dark	43752.1	3348.33	21.163	20.905	0.258	3.4	2932.86	0.045	0.351	0.306	5	0.875917	0.4	0.5	2165	1533	1549	815
130RC	F	Cre-	103	107	1674	Dark	43751	3346.41	21.163	20.867	0.296	1.8	2962.48	0.044	0.384	0.34	2.6	0.885271	0.5	0.5	1782	989	1226	487
130RC	F	Cre-	255	107	4410	Dark	43752.9	3344.09	21.163	21.024	0.139	4.3	2874.94	0.042	0.236	0.195	6.4	0.859706	0.2	0.5	40	14	33	17
130RC	F	Cre-	101	107	1638	Dark	43750.9	3339.57	21.163	20.868	0.295	1.7	2917.81	0.043	0.354	0.312	2.5	0.873706	0.4	0.5	2170	1418	1644	789
130RC	F	Cre-	282	107	4896	Dark	43753.2	3337.2	21.163	20.982	0.181	4.9	2535.73	0.046	0.284	0.238	7.2	0.759839	0.3	0.5	27	11	25	11
130RC	F	Cre-	215	107	3690	Light	43752.4	3323.8	21.163	21.009	0.154	3.8	3091.08	0.048	0.28	0.232	5.5	0.929983	0.2	0.5	18	7	38	11
130RC	F	Cre-	20	107	180	Dark	43749.9	3318.78	21.163	20.892	0.271	0.3	2925.85	0.044	0.389	0.345	0.5	0.881603	0.4	0.5	1046	420	873	295
130RC	F	Cre-	162	107	2736	Light	43751.7	3318.73	21.163	21.002	0.161	2.8	2642.23	0.04	0.278	0.238	4.1	0.796157	0.2	0.5	26	1	16	0
130RC	F	Cre-	292	107	5076	Light	43753.3	3310.44	21.162	21.015	0.147	5	3308.59	0.051	0.282	0.231	7.5	0.999442	0.2	0.5	187	29	148	11
130RC	F	Cre-	202	107	3456	Dark	43752.2	3308.18	21.163	20.898	0.265	3.6	3163.54	0.045	0.387	0.342	5.2	0.956277	0.4	0.5	1299	671	1149	447
130RC	F	Cre-	66	107	1008	Light	43750.5	3303.13	21.163	20.99	0.173	1.1	2998.4	0.041	0.285	0.245	1.6	0.907744	0.3	0.5	12	3	11	5
130RC	F	Cre-	247	107	4266	Light	43752.8	3301.33	21.163	21.023	0.14	4.2	2608.85	0.041	0.275	0.234	6.2	0.790242	0.2	0.5	186	52	180	64
130RC	F	Cre-	11	107	18	Dark	43749.8	3300.87	21.163	21.02	0.143	0.2	3055.01	0.04	0.259	0.219	0.2	0.925517	0.2	0.5	79	41	44	16
130RC	F	Cre-	13	107	54	Dark	43749.8	3298.38	21.163	20.912	0.251	0.2	2702.63	0.041	0.352	0.312	0.3	0.819381	0.4	0.5	884	433	797	250
130RC	F	Cre-	154	107	2592	Light	43751.6	3294.86	21.163	21.012	0.151	2.7	3255.24	0.041	0.278	0.237	3.9	0.987975	0.2	0.5	20	7	4	1
130RC	F	Cre-	106	107	1728	Dark	43751	3291.44	21.163	20.914	0.248	1.9	3017.79	0.045	0.334	0.289	2.6	0.916859	0.4	0.5	1400	834	906	430
130RC	F	Cre-	218	107	3744	Light	43752.4	3286.49	21.163	21.017	0.146	3.8	2863.26	0.047	0.283	0.237	5.6	0.871222	0.2	0.5	18	2	67	0
130RC	F	Cre-	47	107	666	Dark	43750.3	3282.97	21.163	21.015	0.147	0.8	2864.25	0.045	0.266	0.221	1.2	0.872458	0.2	0.5	30	0	21	6
130RC	F	Cre-	147	107	2466	Light	43751.5	3279.77	21.163	21.001	0.162	2.5	2972.39	0.041	0.297	0.256	3.7	0.906282	0.3	0.5	6	0	5	0
130RC	F	Cre-	169	107	2862	Light	43751.8	3271.26	21.163	20.966	0.197	2.9	2546.23	0.04	0.327	0.287	4.3	0.778364	0.3	0.5	506	112	608	103
130RC	F	Cre-	253	107	4374	Dark	43752.8	3260.88	21.163	20.992	0.171	4.3	3103.91	0.042	0.276	0.234	6.4	0.951862	0.3	0.5	427	85	420	38
130RC	F	Cre-	64	107	972	Light	43750.5	3259.04	21.163	20.912	0.251	1.1	2683.52	0.041	0.37	0.329	1.6	0.823408	0.4	0.5	752	322	419	175
130RC	F	Cre-	205	107	3510	Dark	43752.2	3258.78	21.163	21.006	0.157	3.6	3089.24	0.043	0.281	0.238	5.3	0.947975	0.2	0.5	193	80	328	79
130RC	F	Cre-	50	107	720	Light	43750.3	3257.66	21.163	20.92	0.243	0.9	2811.55	0.045	0.357	0.312	1.2	0.863058	0.4	0.5	618	194	658	163
130RC	F	Cre-	98	107	1584	Dark	43750.9	3256.04	21.163	20.88	0.283	1.7	2644.05	0.042	0.377	0.336	2.4	0.812043	0.4	0.5	1738	995	1307	595
130RC	F	Cre-	153	107	2574	Light	43751.6	3254.4	21.163	21.035	0.128	2.6	2985.46	0.042	0.264	0.222	3.9	0.917359	0.2	0.5	21	6	12	0
130RC	F	Cre-	239	107	4122	Light	43752.7	3250.43	21.163	21.016	0.147	4.1	3061.88	0.04	0.29	0.25	6.1	0.941992	0.2	0.5	13	0	18	7
130RC	F	Cre-	214	107	3672	Light	43752.4	3249.24	21.163	20.904	0.258	3.8	3044.21	0.048	0.354	0.306	5.5	0.936901	0.4	0.5	762	306	766	244
130RC	F	Cre-	261	107	4518	Dark	43752.9	3244.52	21.163	20.962	0.201	4.4	3269.17	0.045	0.325	0.28	6.6	1.0076	0.3	0.5	58	25	63	27
130RC	F	Cre-	294	107	5112	Light	43753.4	3241.33	21.162	20.988	0.174	5.1	3123.36	0.051	0.323	0.272	7.5	0.963606	0.3	0.5	299	121	277	75
130RC	F	Cre-	300	107	5220	Light	43753.4	3240	21.163	21.001	0.162	5.1	2700.78	0.047	0.316	0.269	7.7	0.833575	0.3	0.5	224	69	257	49
130RC	F	Cre-	256	107	4428	Dark	43752.9	3239.02	21.163	20.989	0.174	4.3	3274.68	0.042	0.268	0.226	6.5	1.01101	0.3	0.5	127	61	97	47
130RC	F	Cre-	287	107	4986	Dark	43753.3	3236.72	21.162	20.877	0.285	5	3185.98	0.048	0.426	0.377	7.4	0.984326	0.4	0.5	950	545	620	294
130RC	F	Cre-	189	107	3222	Dark	43752	3230.66	21.163	20.882	0.281	3.3	3207.28	0.044	0.362	0.318	4.8	0.992764	0.4	0.5	2370	1495	1784	858
130RC	F	Cre-	231	107	3978	Light	43752.6	3229.07	21.163	21.025	0.138	4	2869.24	0.04	0.273	0.233	5.9	0.888566	0.2	0.5	164	3	90	6
130RC	F	Cre-	115	107	1890	Dark	43751.1	3224.32	21.163	20.983	0.18	2	2919.43	0.042	0.309	0.267	2.9	0.905442	0.3	0.5	63	10	82	22
130RC	F	Cre-	127	107	2106	Dark	43751.3	3221.75	21.163	20.952	0.211	2.3	3074.11	0.041	0.344	0.303	3.2	0.954174	0.3	0.5	374	54	561	75
130RC	F	Cre-	242	107	4176	Light	43752.7	3216.36	21.163	21.033	0.13	4.1	3083.95	0.041	0.272	0.231	6.1	0.95883	0.2	0.5	9	1	9	1
130RC	F	Cre-	286	107	4968	Dark	43753.3	3210.68	21.163	20.975	0.188	4.9	3212.39	0.047	0.304	0.257	7.3	1.00053	0.3	0.5	142	39	133	40
130RC	F	Cre-	59	107	882	Light	43750.4	3209.51	21.163	21.003	0.16	1	3076.03	0.043	0.283	0.24	1.4	0.958411	0.2	0.5	61	31	73	35
130RC	F	Cre-	289	107	5022	Dark	43753.3	3204.15	21.162	20.986	0.177	5	3120.47	0.048	0.289	0.241	7.4	0.973884	0.3	0.5	45	11	42	16
130RC	F	Cre-	34	107	432	Dark	43750.1	3188.81	21.163	20.95	0.212	0.6	2839.02	0.046	0.322	0.276	0.9	0.890305	0.3	0.5	499	187	505	136
130RC	F	Cre-	114	107	1872	Dark	43751.1	3184.07	21.163	20.928	0.235	2	2794.88	0.042	0.364	0.321	2.9	0.87777	0.4	0.5	374	119	319	77
130RC	F	Cre-	251	107	4338	Dark	43752.8	3181.05	21.163	20.886	0.277	4.3	2804.12	0.042	0.399	0.357	6.3	0.881509	0.4	0.5	1584	948	1424	597
130RC	F	Cre-	108	107	1764	Dark	43751	3172.11	21.163	20.883	0.28	1.9	2719.3	0.043	0.347	0.304	2.7	0.857254	0.4	0.5	1610	923	1273	536
130RC	F	Cre-	244	107	4212	Light	43752.7	3157.43	21.163	20.955	0.208	4.2	3062.11	0.04	0.351	0.311	6.2	0.969813	0.3	0.5	932	333	686	191
130RC	F	Cre-	91	107	1458	Dark	43750.8	3153.49	21.163	20.989	0.174	1.5	2903.26	0.041	0.282	0.241	2.2	0.920651	0.3	0.5	540	189	520	136
130RC	F	Cre-	221	107	3798	Light	43752.4	3152.48	21.163	21.017	0.145	3.9	2722.04	0.046	0.274	0.228	5.7	0.863461	0.2	0.5	50	12	71	14
130RC	F	Cre-	278	107	4824	Dark	43753.2	3150.9	21.163	20.876	0.287	4.8	2889.51	0.047	0.411	0.364	7.1	0.917042	0.4	0.5	502	194	469	137
130RC	F	Cre-	288	107	5004	Dark	43753.3	3147.38	21.162	20.931	0.232	5	2993.21	0.049	0.374	0.325	7.4	0.951018	0.4	0.5	622	178	500	127
130RC	F	Cre-	88	107	1404	Light	43750.8	3145.33	21.163	20.993	0.17	1.5	3211.18	0.041	0.283	0.242	2.2	1.02094	0.3	0.5	27	8	51	12
130RC	F	Cre-	204	107	3492	Dark	43752.2	3134.26	21.163	20.911	0.251	3.6	3059.13	0.044	0.356	0.311	5.2	0.976029	0.4	0.5	588	248	437	160
130RC	F	Cre-	23	107	234	Dark	43750	3132.92	21.163	21.01	0.153	0.4	2512.06	0.044	0.274	0.23	0.5	0.801828	0.2	0.5	61	24	50	20
130RC	F	Cre-	16	107	108	Dark	43749.9	3130.58	21.163	20.995	0.168	0.2	2936.42	0.043	0.289	0.246	0.3	0.937979	0.3	0.5	115	74	72	39
130RC	F	Cre-	232	107	3996	Light	43752.6	3129.78	21.163	21.023	0.14	4	2874.62	0.04	0.251	0.211	5.9	0.918473	0.2	0.5	108	67	101	51
130RC	F	Cre-	69	107	1062	Light	43750.5	3121.38	21.163	20.997	0.166	1.2	3078.49	0.04	0.282	0.242	1.7	0.986261	0.3	0.5	187	57	151	40
130RC	F	Cre-	175	107	2970	Dark	43751.9	3120.96	21.163	21.003	0.16	3	2705.82	0.042	0.297	0.255	4.4	0.866984	0.2	0.5	11	2	55	0
130RC	F	Cre-	60	107	900	Light	43750.4	3110.79	21.163	21	0.164	1	3029.84	0.042	0.283	0.241	1.5	0.973979	0.3	0.5	18	7	27	3
130RC	F	Cre-	12	107	36	Dark	43749.8	3100.37	21.163	20.901	0.263	0.2	2749.01	0.04	0.348	0.308	0.2	0.886672	0.4	0.5	876	400	661	246
130RC	F	Cre-	267	107	4626	Dark	43753	3096.1	21.163	20.863	0.299	4.5	2937.31	0.045	0.449	0.403	6.8	0.948712	0.5	0.5	3055	2307	1920	1126
130RC	F	Cre-	61	107	918	Light	43750.4	3093.04	21.163	20.99	0.173	1	2710.14	0.042	0.291	0.248	1.5	0.876206	0.3	0.5	31	11	21	1
130RC	F	Cre-	116	107	1908	Dark	43751.1	3089.67	21.163	20.974	0.189	2.1	3016.03	0.042	0.316	0.274	2.9	0.976167	0.3	0.5	86	22	56	11
130RC	F	Cre-	280	107	4860	Dark	43753.2	3077.46	21.163	20.903	0.259	4.8	2801.88	0.047	0.4	0.352	7.2	0.910451	0.4	0.5	603	216	604	120
130RC	F	Cre-	62	107	936	Light	43750.5	3075.62	21.163	20.899	0.264	1.1	2638.18	0.042	0.383	0.341	1.5	0.857773	0.4	0.5	751	292	856	224
130RC	F	Cre-	74	107	1152	Light	43750.6	3047.11	21.163	20.992	0.171	1.2	2878.68	0.04	0.285	0.245	1.8	0.944724	0.3	0.5	137	91	125	46
130RC	F	Cre-	298	107	5184	Light	43753.4	3036.04	21.162	21.034	0.129	5.1	2882.28	0.048	0.265	0.217	7.6	0.949357	0.2	0.5	245	75	282	72
130RC	F	Cre-	56	107	828	Light	43750.4	3027.8	21.163	21.016	0.147	1	2870.3	0.045	0.266	0.221	1.4	0.947983	0.2	0.5	87	46	61	29
130RC	F	Cre-	160	107	2700	Light	43751.7	3024.57	21.163	21.007	0.157	2.7	3114.61	0.04	0.28	0.239	4.1	1.02977	0.2	0.5	31	15	39	9
130RC	F	Cre-	53	107	774	Light	43750.3	3012.86	21.163	21.014	0.148	0.9	2656.01	0.045	0.265	0.22	1.3	0.881556	0.2	0.5	65	38	49	23
130RC	F	Cre-	132	107	2196	Light	43751.3	3008.13	21.163	21.01	0.153	2.3	2847.78	0.042	0.291	0.25	3.3	0.946695	0.2	0.5	8	0	15	10
130RC	F	Cre-	112	107	1836	Dark	43751.1	2995.98	21.163	20.892	0.271	2	2616.24	0.042	0.379	0.337	2.8	0.87325	0.4	0.5	641	342	568	207
130RC	F	Cre-	6	107	NA	NA	43749.8	2989.35	21.163	20.905	0.258	0.1	2642	0.038	0.317	0.279	0.1	0.883803	0.4	0.5	717	376	424	174
130RC	F	Cre-	235	107	4050	Light	43752.6	2988.77	21.163	20.956	0.207	4	3187.55	0.04	0.324	0.284	6	1.06651	0.3	0.5	166	111	95	48
130RC	F	Cre-	63	107	954	Light	43750.5	2986.73	21.163	20.995	0.168	1.1	3004.15	0.042	0.283	0.241	1.5	1.00583	0.3	0.5	17	1	15	1
130RC	F	Cre-	36	107	468	Dark	43750.1	2978.18	21.163	20.917	0.246	0.6	2465.48	0.045	0.363	0.318	0.9	0.827847	0.4	0.5	262	138	229	87
130RC	F	Cre-	35	107	450	Dark	43750.1	2976.89	21.163	21.002	0.161	0.6	2899.17	0.045	0.273	0.228	0.9	0.973894	0.2	0.5	49	16	17	5
130RC	F	Cre-	229	107	3942	Light	43752.5	2976.54	21.163	20.99	0.174	4	2817.16	0.04	0.284	0.243	5.8	0.946455	0.3	0.5	98	38	56	22
130RC	F	Cre-	121	107	1998	Dark	43751.2	2951.43	21.163	20.911	0.252	2.2	2414.71	0.041	0.351	0.31	3.1	0.818149	0.4	0.5	1878	1090	1114	526
130RC	F	Cre-	93	107	1494	Dark	43750.8	2948.7	21.163	20.887	0.276	1.6	2640.36	0.041	0.388	0.347	2.3	0.89543	0.4	0.5	618	228	450	117
130RC	F	Cre-	139	107	2322	Light	43751.4	2946.42	21.163	21.012	0.152	2.4	2651.39	0.041	0.3	0.259	3.5	0.899869	0.2	0.5	41	9	40	11
130RC	F	Cre-	87	107	1386	Light	43750.8	2945.57	21.163	20.981	0.182	1.5	2865.1	0.04	0.297	0.257	2.1	0.97268	0.3	0.5	88	52	65	33
130RC	F	Cre-	58	107	864	Light	43750.4	2941.26	21.163	21.007	0.156	1	2826.14	0.044	0.271	0.227	1.4	0.960862	0.2	0.5	45	24	26	15
130RC	F	Cre-	32	107	396	Dark	43750.1	2936.56	21.163	20.913	0.25	0.6	2584.54	0.045	0.355	0.31	0.8	0.880126	0.4	0.5	2041	1356	1345	698
130RC	F	Cre-	142	107	2376	Light	43751.5	2928.33	21.163	20.925	0.238	2.5	2727.09	0.041	0.388	0.347	3.6	0.931279	0.4	0.5	524	48	737	79
130RC	F	Cre-	216	107	3708	Light	43752.4	2884.86	21.163	20.924	0.239	3.8	2627.39	0.048	0.341	0.293	5.5	0.910752	0.4	0.5	210	107	105	39
130RC	F	Cre-	299	107	5202	Light	43753.4	2878.48	21.163	21.034	0.129	5.1	2273.75	0.047	0.254	0.207	7.6	0.789912	0.2	0.5	21	8	30	8
130RC	F	Cre-	118	107	1944	Dark	43751.2	2875.74	21.163	20.828	0.335	2.1	2268.11	0.042	0.458	0.416	3	0.788707	0.5	0.5	934	492	727	306
130RC	F	Cre-	236	107	4068	Light	43752.6	2867.87	21.163	20.924	0.239	4.1	2884.79	0.04	0.385	0.345	6	1.0059	0.4	0.5	946	482	914	336
130RC	F	Cre-	104	107	1692	Dark	43751	2856.13	21.163	20.898	0.265	1.8	2797.73	0.044	0.35	0.306	2.6	0.979555	0.4	0.5	1815	1172	1381	665
130RC	F	Cre-	21	107	198	Dark	43749.9	2854.37	21.163	20.993	0.17	0.3	2362.85	0.043	0.288	0.244	0.5	0.827799	0.3	0.5	331	132	251	86
130RC	F	Cre-	52	107	756	Light	43750.3	2853.11	21.163	20.966	0.196	0.9	2181.28	0.045	0.319	0.273	1.3	0.764527	0.3	0.5	342	105	525	111
130RC	F	Cre-	46	107	648	Dark	43750.3	2845.47	21.163	20.951	0.211	0.8	2649.65	0.046	0.327	0.281	1.1	0.931183	0.3	0.5	618	308	589	196
130RC	F	Cre-	165	107	2790	Light	43751.7	2823.69	21.163	20.967	0.197	2.8	2184.06	0.041	0.319	0.278	4.2	0.773477	0.3	0.5	387	98	546	97
130RC	F	Cre-	265	107	4590	Dark	43753	2813	21.163	20.986	0.177	4.5	2138.82	0.045	0.323	0.278	6.7	0.760333	0.3	0.5	574	307	651	238
130RC	F	Cre-	171	107	2898	Dark	43751.8	2800.18	21.163	21.011	0.153	2.9	2527.61	0.04	0.274	0.233	4.3	0.90266	0.2	0.5	27	0	0	0
130RC	F	Cre-	70	107	1080	Light	43750.6	2794.38	21.163	21.001	0.162	1.2	2738.09	0.04	0.275	0.235	1.7	0.979856	0.3	0.5	4	0	18	5
130RC	F	Cre-	230	107	3960	Light	43752.6	2788.03	21.163	20.932	0.232	4	2294.98	0.04	0.368	0.328	5.8	0.823155	0.4	0.5	817	273	747	193
130RC	F	Cre-	296	107	5148	Light	43753.4	2783.55	21.162	20.919	0.243	5.1	2808.91	0.051	0.391	0.34	7.6	1.00911	0.4	0.5	189	65	195	48
130RC	F	Cre-	258	107	4464	Dark	43752.9	2746.96	21.163	21.006	0.157	4.4	2044.01	0.044	0.257	0.213	6.5	0.744097	0.2	0.5	62	26	43	12
130RC	F	Cre-	37	107	486	Dark	43750.1	2732.88	21.163	20.957	0.206	0.7	2774.64	0.046	0.317	0.271	0.9	1.01528	0.3	0.5	809	296	754	243
130RC	F	Cre-	238	107	4104	Light	43752.7	2705.33	21.163	21.009	0.155	4.1	2139.4	0.04	0.297	0.257	6	0.790811	0.2	0.5	37	10	64	20
130RC	F	Cre-	80	107	1260	Light	43750.7	2416.93	21.163	20.976	0.187	1.4	2191.95	0.039	0.299	0.261	2	0.906914	0.3	0.5	86	21	92	17
130BC	F	Cre-	116	105	1908	Dark	43751.1	3805.2	21.163	20.821	0.342	2.4	3106.52	0.042	0.434	0.392	3.1	0.81639	0.5	0.5	1396	678	977	407
130BC	F	Cre-	186	105	3168	Dark	43752	3800.72	21.163	20.981	0.182	3.7	3153.85	0.043	0.314	0.271	4.9	0.829804	0.3	0.5	7	0	18	7
130BC	F	Cre-	78	105	1224	Light	43750.7	3779.06	21.163	20.98	0.184	1.6	3126.02	0.039	0.305	0.265	2	0.827194	0.3	0.5	182	66	146	55
130BC	F	Cre-	9	105	NA	NA	43749.8	3768.88	21.163	20.905	0.259	0.2	2866.25	0.04	0.338	0.298	0.2	0.760503	0.4	0.5	2225	1358	1542	795
130BC	F	Cre-	230	105	3960	Light	43752.6	3740.45	21.163	20.996	0.167	4.6	2817.2	0.04	0.305	0.264	6.1	0.753172	0.3	0.5	8	0	22	4
130BC	F	Cre-	247	105	4266	Light	43752.8	3738.17	21.163	20.913	0.25	4.8	2800.72	0.041	0.384	0.343	6.5	0.749223	0.4	0.5	1961	1420	1568	884
130BC	F	Cre-	155	105	2610	Light	43751.6	3665.37	21.163	20.993	0.17	3.2	3093.23	0.041	0.301	0.26	4.1	0.843905	0.3	0.5	92	44	98	30
130BC	F	Cre-	138	105	2304	Light	43751.4	3662.29	21.163	20.863	0.301	2.9	2913.36	0.041	0.402	0.361	3.7	0.795502	0.5	0.5	1134	758	888	463
130BC	F	Cre-	142	105	2376	Light	43751.5	3652.14	21.163	21.022	0.141	2.9	2865.23	0.041	0.259	0.218	3.8	0.784534	0.2	0.5	16	0	30	10
130BC	F	Cre-	110	105	1800	Dark	43751.1	3637.15	21.163	20.861	0.302	2.3	3090.39	0.042	0.369	0.327	2.9	0.849673	0.5	0.5	2475	1742	2178	1286
130BC	F	Cre-	168	105	2844	Light	43751.8	3631.3	21.163	20.987	0.177	3.4	3142.23	0.04	0.308	0.268	4.5	0.865318	0.3	0.5	42	17	55	22
130BC	F	Cre-	169	105	2862	Light	43751.8	3616.57	21.163	20.997	0.166	3.4	3107.28	0.04	0.305	0.265	4.5	0.85918	0.3	0.5	348	98	319	99
130BC	F	Cre-	131	105	2178	Light	43751.3	3615.49	21.163	20.812	0.351	2.7	3035.14	0.041	0.466	0.425	3.5	0.839482	0.5	0.5	1927	1224	1576	763
130BC	F	Cre-	74	105	1152	Light	43750.6	3599.88	21.163	20.881	0.282	1.5	3044.79	0.04	0.344	0.305	1.9	0.845802	0.4	0.5	1354	804	1012	441
130BC	F	Cre-	215	105	3690	Light	43752.4	3595.13	21.163	20.908	0.254	4.3	2839.73	0.048	0.345	0.297	5.7	0.789884	0.4	0.5	78	42	124	32
130BC	F	Cre-	208	105	3564	Dark	43752.3	3580.86	21.163	20.975	0.188	4.2	3079.07	0.045	0.278	0.233	5.6	0.859871	0.3	0.5	82	36	67	16
130BC	F	Cre-	8	105	NA	NA	43749.8	3576.63	21.163	20.907	0.256	0.2	2721.14	0.039	0.339	0.3	0.2	0.760812	0.4	0.5	2473	1540	1702	818
130BC	F	Cre-	95	105	1530	Dark	43750.9	3571.21	21.163	20.997	0.166	1.9	2656.59	0.041	0.294	0.253	2.4	0.743891	0.3	0.5	39	8	35	15
130BC	F	Cre-	229	105	3942	Light	43752.5	3569.97	21.163	20.977	0.186	4.6	3014.39	0.04	0.324	0.284	6.1	0.844373	0.3	0.5	48	6	30	10
130BC	F	Cre-	54	105	792	Light	43750.4	3565.52	21.163	20.993	0.17	1.1	2932.08	0.045	0.286	0.242	1.4	0.822342	0.3	0.5	276	47	313	82
130BC	F	Cre-	291	105	5058	Light	43753.3	3561.55	21.162	20.938	0.224	5.7	2863.59	0.05	0.358	0.309	7.8	0.804027	0.3	0.5	835	371	860	382
130BC	F	Cre-	298	105	5184	Light	43753.4	3547.59	21.162	20.998	0.165	5.8	2681.94	0.048	0.271	0.223	7.9	0.755989	0.3	0.5	24	3	53	10
130BC	F	Cre-	292	105	5076	Light	43753.3	3546.1	21.162	20.956	0.207	5.7	2701.24	0.051	0.342	0.291	7.8	0.761751	0.3	0.5	51	2	29	10
130BC	F	Cre-	270	105	4680	Dark	43753.1	3541.66	21.163	20.869	0.294	5.3	3044.75	0.046	0.419	0.372	7.2	0.859696	0.4	0.5	2565	1792	2157	1302
130BC	F	Cre-	73	105	1134	Light	43750.6	3540.68	21.163	20.91	0.253	1.5	2679.71	0.04	0.323	0.283	1.9	0.756837	0.4	0.5	992	413	868	266
130BC	F	Cre-	71	105	1098	Light	43750.6	3540.4	21.163	20.872	0.291	1.4	2786.14	0.04	0.362	0.322	1.8	0.786957	0.4	0.5	2777	1899	1901	969
130BC	F	Cre-	5	105	NA	NA	43749.7	3538.36	21.163	20.888	0.275	0.1	3064.82	0.039	0.333	0.294	0.1	0.86617	0.4	0.5	2734	1658	2068	969
130BC	F	Cre-	42	105	576	Dark	43750.2	3533.35	21.163	20.935	0.228	0.9	3036.62	0.046	0.34	0.294	1.1	0.859416	0.3	0.5	441	135	284	71
130BC	F	Cre-	266	105	4608	Dark	43753	3526.73	21.163	20.851	0.312	5.2	3040.53	0.045	0.445	0.4	7.1	0.862138	0.5	0.5	2879	2140	2560	1622
130BC	F	Cre-	94	105	1512	Dark	43750.9	3526.33	21.163	20.985	0.178	1.9	2753.77	0.041	0.307	0.266	2.4	0.780917	0.3	0.5	12	0	42	6
130BC	F	Cre-	52	105	756	Light	43750.3	3524.04	21.163	20.839	0.323	1.1	2647.44	0.045	0.427	0.382	1.4	0.751252	0.5	0.5	1112	638	835	364
130BC	F	Cre-	127	105	2106	Dark	43751.3	3523.17	21.163	20.993	0.171	2.6	3092.82	0.041	0.262	0.221	3.4	0.877852	0.3	0.5	74	13	126	23
130BC	F	Cre-	130	105	2160	Light	43751.3	3522.97	21.163	20.995	0.168	2.7	3070.84	0.041	0.273	0.232	3.5	0.871662	0.3	0.5	27	10	32	12
130BC	F	Cre-	30	105	360	Dark	43750.1	3521.9	21.163	20.858	0.305	0.6	2698.72	0.046	0.383	0.337	0.8	0.766268	0.5	0.5	3147	2090	2028	1064
130BC	F	Cre-	180	105	3060	Dark	43751.9	3520.59	21.163	20.876	0.287	3.6	3007.75	0.042	0.359	0.317	4.8	0.854333	0.4	0.5	2013	1403	1747	1026
130BC	F	Cre-	199	105	3402	Dark	43752.2	3517.86	21.163	20.918	0.245	4	2982.95	0.045	0.323	0.277	5.3	0.847943	0.4	0.5	1542	782	1439	628
130BC	F	Cre-	274	105	4752	Dark	43753.1	3512.44	21.163	20.907	0.255	5.4	2816.85	0.046	0.333	0.287	7.3	0.801964	0.4	0.5	2142	1496	1933	1148
130BC	F	Cre-	23	105	234	Dark	43750	3508.52	21.163	20.982	0.181	0.5	2623.79	0.044	0.304	0.26	0.6	0.747835	0.3	0.5	195	90	157	56
130BC	F	Cre-	99	105	1602	Dark	43750.9	3504.14	21.163	20.851	0.312	2	2991.92	0.042	0.421	0.38	2.6	0.853824	0.5	0.5	3404	2481	2515	1445
130BC	F	Cre-	151	105	2538	Light	43751.6	3502.2	21.163	20.861	0.302	3.1	2647.16	0.042	0.433	0.391	4	0.755855	0.5	0.5	879	516	842	336
130BC	F	Cre-	160	105	2700	Light	43751.7	3500.56	21.163	20.889	0.274	3.2	2943.7	0.04	0.398	0.357	4.3	0.840923	0.4	0.5	1959	1348	1589	820
130BC	F	Cre-	136	105	2268	Light	43751.4	3499.25	21.163	20.918	0.245	2.8	2758.22	0.041	0.326	0.285	3.6	0.78823	0.4	0.5	2361	1585	1959	1115
130BC	F	Cre-	166	105	2808	Light	43751.8	3491.03	21.163	20.994	0.169	3.3	2659.99	0.04	0.29	0.25	4.4	0.761951	0.3	0.5	15	0	35	8
130BC	F	Cre-	164	105	2772	Light	43751.7	3490.54	21.163	20.984	0.179	3.3	2705.24	0.04	0.266	0.226	4.4	0.77502	0.3	0.5	44	18	39	13
130BC	F	Cre-	264	105	4572	Dark	43753	3486.23	21.163	20.845	0.318	5.1	2981.4	0.044	0.449	0.405	7	0.855195	0.5	0.5	4213	3329	3298	2197
130BC	F	Cre-	4	105	NA	NA	43749.7	3484.54	21.163	20.896	0.267	0.1	2833.13	0.039	0.334	0.295	0.1	0.813056	0.4	0.5	3137	2085	2103	1086
130BC	F	Cre-	217	105	3726	Light	43752.4	3481.48	21.163	20.976	0.187	4.4	2951.65	0.047	0.316	0.268	5.8	0.847816	0.3	0.5	125	4	193	25
130BC	F	Cre-	254	105	4392	Dark	43752.9	3472.26	21.163	20.891	0.272	4.9	3055.32	0.042	0.361	0.319	6.7	0.879922	0.4	0.5	2577	1798	1952	983
130BC	F	Cre-	145	105	2430	Light	43751.5	3471.36	21.163	20.879	0.284	3	2808.56	0.041	0.37	0.329	3.9	0.809068	0.4	0.5	3166	2312	2694	1580
130BC	F	Cre-	117	105	1926	Dark	43751.1	3464.52	21.163	20.823	0.34	2.4	2599.45	0.041	0.421	0.379	3.1	0.750307	0.5	0.5	3856	2906	3144	2096
130BC	F	Cre-	286	105	4968	Dark	43753.3	3463.47	21.163	20.919	0.243	5.6	3060.21	0.047	0.328	0.281	7.6	0.88357	0.4	0.5	793	206	776	248
130BC	F	Cre-	66	105	1008	Light	43750.5	3457.19	21.163	21.002	0.162	1.3	2708.81	0.041	0.271	0.23	1.7	0.783529	0.2	0.5	20	1	40	11
130BC	F	Cre-	22	105	216	Dark	43750	3454.39	21.163	20.968	0.195	0.5	2897.15	0.044	0.308	0.264	0.6	0.838686	0.3	0.5	911	345	529	185
130BC	F	Cre-	109	105	1782	Dark	43751	3453.69	21.163	20.857	0.307	2.2	2839.92	0.042	0.402	0.359	2.9	0.822283	0.5	0.5	2459	1702	2284	1287
130BC	F	Cre-	76	105	1188	Light	43750.6	3452.55	21.163	20.995	0.168	1.5	2583.04	0.039	0.275	0.236	2	0.748155	0.3	0.5	47	4	48	13
130BC	F	Cre-	289	105	5022	Dark	43753.3	3447.92	21.162	20.959	0.204	5.7	2887.38	0.048	0.295	0.246	7.7	0.837426	0.3	0.5	690	390	698	284
130BC	F	Cre-	129	105	2142	Dark	43751.3	3446.84	21.163	20.995	0.168	2.7	2900.23	0.041	0.29	0.25	3.4	0.841417	0.3	0.5	27	7	29	9
130BC	F	Cre-	144	105	2412	Light	43751.5	3445.62	21.163	20.848	0.315	3	2753.38	0.041	0.419	0.378	3.8	0.799096	0.5	0.5	3908	3064	3283	2133
130BC	F	Cre-	281	105	4878	Dark	43753.2	3442.12	21.163	20.867	0.295	5.5	2672.25	0.047	0.425	0.377	7.5	0.77634	0.5	0.5	2644	1835	2060	1174
130BC	F	Cre-	122	105	2016	Dark	43751.2	3441.37	21.163	20.873	0.29	2.5	2592.28	0.042	0.386	0.345	3.3	0.75327	0.4	0.5	2626	1843	2215	1315
130BC	F	Cre-	284	105	4932	Dark	43753.2	3436.27	21.163	20.91	0.252	5.6	2657.29	0.047	0.358	0.31	7.6	0.773306	0.4	0.5	2193	1374	1951	1072
130BC	F	Cre-	104	105	1692	Dark	43751	3432.19	21.163	20.814	0.349	2.1	3106.35	0.044	0.435	0.391	2.7	0.905064	0.5	0.5	3699	2737	2933	1805
130BC	F	Cre-	210	105	3600	Light	43752.3	3431.44	21.163	20.897	0.266	4.2	2799.99	0.047	0.385	0.338	5.6	0.815981	0.4	0.5	1826	1146	1570	837
130BC	F	Cre-	261	105	4518	Dark	43752.9	3429.47	21.163	20.982	0.181	5	2944.06	0.045	0.318	0.273	6.9	0.85846	0.3	0.5	33	9	43	11
130BC	F	Cre-	178	105	3024	Dark	43751.9	3427.32	21.163	20.892	0.271	3.5	2753.53	0.042	0.388	0.346	4.7	0.803407	0.4	0.5	2483	1760	1981	1203
130BC	F	Cre-	267	105	4626	Dark	43753	3426.61	21.163	20.872	0.29	5.2	2811.11	0.045	0.384	0.338	7.1	0.820375	0.4	0.5	2875	2065	2505	1566
130BC	F	Cre-	259	105	4482	Dark	43752.9	3426.57	21.163	20.945	0.218	5	2998.07	0.044	0.36	0.315	6.8	0.874949	0.3	0.5	481	213	544	188
130BC	F	Cre-	87	105	1386	Light	43750.8	3425.73	21.163	20.843	0.32	1.7	2995.83	0.04	0.431	0.391	2.2	0.874506	0.5	0.5	1646	1129	1335	645
130BC	F	Cre-	118	105	1944	Dark	43751.2	3425.23	21.163	20.852	0.311	2.4	2794.2	0.042	0.397	0.355	3.1	0.815772	0.5	0.5	2531	1718	2011	1175
130BC	F	Cre-	102	105	1656	Dark	43751	3423.87	21.163	20.834	0.329	2	2762.46	0.043	0.379	0.335	2.7	0.806825	0.5	0.5	3356	2429	2520	1564
130BC	F	Cre-	204	105	3492	Dark	43752.2	3421.85	21.163	20.89	0.273	4.1	2773.4	0.044	0.354	0.309	5.5	0.810498	0.4	0.5	2382	1764	1859	1103
130BC	F	Cre-	232	105	3996	Light	43752.6	3420.06	21.163	21.01	0.154	4.6	2763.13	0.04	0.269	0.229	6.2	0.807919	0.2	0.5	103	56	54	27
130BC	F	Cre-	288	105	5004	Dark	43753.3	3415.22	21.162	20.988	0.174	5.6	2978.43	0.049	0.27	0.221	7.7	0.872103	0.3	0.5	101	42	89	29
130BC	F	Cre-	46	105	648	Dark	43750.3	3414.85	21.163	20.876	0.287	1	2587.43	0.046	0.379	0.333	1.2	0.757701	0.4	0.5	2702	1745	1776	887
130BC	F	Cre-	193	105	3294	Dark	43752.1	3414.22	21.163	20.867	0.296	3.9	2609.45	0.045	0.361	0.317	5.2	0.764288	0.4	0.5	3070	2299	2785	1779
130BC	F	Cre-	132	105	2196	Light	43751.3	3411.81	21.163	20.871	0.292	2.7	2979.25	0.042	0.399	0.358	3.5	0.873219	0.4	0.5	2597	1908	2203	1320
130BC	F	Cre-	134	105	2232	Light	43751.4	3406.52	21.163	20.975	0.188	2.8	2666.49	0.041	0.284	0.243	3.6	0.782761	0.3	0.5	224	41	323	47
130BC	F	Cre-	163	105	2754	Light	43751.7	3404.93	21.163	20.991	0.172	3.3	2780.1	0.041	0.259	0.218	4.3	0.816492	0.3	0.5	760	502	701	354
130BC	F	Cre-	96	105	1548	Dark	43750.9	3404.39	21.163	20.996	0.167	1.9	2555.63	0.041	0.29	0.249	2.5	0.750686	0.3	0.5	36	3	45	20
130BC	F	Cre-	157	105	2646	Light	43751.6	3404.28	21.163	20.975	0.188	3.2	2605.96	0.04	0.295	0.254	4.2	0.765495	0.3	0.5	11	1	14	6
130BC	F	Cre-	191	105	3258	Dark	43752.1	3403.28	21.163	20.868	0.295	3.8	2795.37	0.044	0.382	0.338	5.1	0.821375	0.4	0.5	2957	2176	2620	1632
130BC	F	Cre-	182	105	3096	Dark	43752	3402.86	21.163	20.955	0.208	3.6	2956.08	0.042	0.317	0.275	4.8	0.868704	0.3	0.5	183	23	244	53
130BC	F	Cre-	61	105	918	Light	43750.4	3400.36	21.163	20.91	0.253	1.2	2938.55	0.042	0.365	0.323	1.6	0.864187	0.4	0.5	1441	776	1078	467
130BC	F	Cre-	290	105	5040	Light	43753.3	3397.73	21.162	20.914	0.248	5.7	2936.69	0.049	0.376	0.327	7.7	0.864311	0.4	0.5	2038	1359	1611	909
130BC	F	Cre-	21	105	198	Dark	43749.9	3394.76	21.163	20.95	0.213	0.4	2889.49	0.043	0.322	0.279	0.5	0.85116	0.3	0.5	362	135	281	86
130BC	F	Cre-	59	105	882	Light	43750.4	3394.03	21.163	21.022	0.141	1.2	2980.52	0.043	0.251	0.208	1.5	0.878165	0.2	0.5	23	14	32	13
130BC	F	Cre-	82	105	1296	Light	43750.7	3392.78	21.163	20.837	0.327	1.6	2967.25	0.039	0.435	0.396	2.1	0.874577	0.5	0.5	3182	2259	2278	1315
130BC	F	Cre-	256	105	4428	Dark	43752.9	3386.2	21.163	20.981	0.182	5	2830.69	0.042	0.308	0.265	6.8	0.835949	0.3	0.5	422	286	359	202
130BC	F	Cre-	38	105	504	Dark	43750.2	3385.44	21.163	20.926	0.236	0.8	2926.48	0.046	0.33	0.284	1	0.864429	0.4	0.5	635	146	545	152
130BC	F	Cre-	125	105	2070	Dark	43751.2	3384.63	21.163	20.853	0.31	2.6	2600.54	0.041	0.403	0.362	3.3	0.76834	0.5	0.5	1771	1102	1478	714
130BC	F	Cre-	242	105	4176	Light	43752.7	3380.26	21.163	20.996	0.167	4.7	3007.04	0.041	0.306	0.266	6.4	0.889589	0.3	0.5	209	16	191	35
130BC	F	Cre-	115	105	1890	Dark	43751.1	3377.75	21.163	20.994	0.169	2.4	2920.9	0.042	0.285	0.243	3	0.864749	0.3	0.5	22	5	6	1
130BC	F	Cre-	28	105	324	Dark	43750	3377.62	21.163	20.842	0.321	0.6	2795.87	0.045	0.428	0.384	0.7	0.827763	0.5	0.5	3495	2466	2212	1210
130BC	F	Cre-	237	105	4086	Light	43752.6	3377.3	21.163	21.006	0.157	4.7	2862.23	0.04	0.27	0.23	6.3	0.847489	0.2	0.5	79	40	59	35
130BC	F	Cre-	60	105	900	Light	43750.4	3377.3	21.163	20.913	0.25	1.2	2634.39	0.042	0.361	0.318	1.6	0.780027	0.4	0.5	310	90	395	109
130BC	F	Cre-	140	105	2340	Light	43751.4	3376.31	21.163	21	0.163	2.9	2842.85	0.041	0.298	0.257	3.7	0.841997	0.3	0.5	4	0	15	3
130BC	F	Cre-	293	105	5094	Light	43753.3	3369.49	21.162	20.989	0.173	5.7	2688.85	0.051	0.306	0.256	7.8	0.798	0.3	0.5	58	8	50	15
130BC	F	Cre-	114	105	1872	Dark	43751.1	3368.42	21.163	20.981	0.182	2.3	2790.4	0.042	0.298	0.256	3	0.828401	0.3	0.5	53	20	75	23
130BC	F	Cre-	2	105	NA	NA	43749.7	3368.31	21.163	20.879	0.284	0	2750.09	0.039	0.349	0.31	0	0.81646	0.4	0.5	3310	2115	1989	948
130BC	F	Cre-	275	105	4770	Dark	43753.1	3364.63	21.163	20.889	0.273	5.4	2759.15	0.047	0.357	0.31	7.3	0.820046	0.4	0.5	1711	1118	1404	719
130BC	F	Cre-	181	105	3078	Dark	43751.9	3362.91	21.163	20.884	0.279	3.6	2501.88	0.042	0.396	0.354	4.8	0.743964	0.4	0.5	2357	1610	2141	1276
130BC	F	Cre-	277	105	4806	Dark	43753.1	3361.63	21.163	20.967	0.195	5.4	2703.35	0.046	0.305	0.258	7.4	0.804177	0.3	0.5	44	2	41	12
130BC	F	Cre-	126	105	2088	Dark	43751.3	3361.49	21.163	20.908	0.256	2.6	2817.58	0.041	0.347	0.305	3.4	0.838194	0.4	0.5	2233	1527	1992	1116
130BC	F	Cre-	172	105	2916	Dark	43751.8	3360.96	21.163	21.029	0.134	3.4	2538.04	0.04	0.257	0.217	4.5	0.755151	0.2	0.5	37	8	36	10
130BC	F	Cre-	263	105	4554	Dark	43753	3360.46	21.163	20.845	0.317	5.1	2800.55	0.045	0.452	0.407	7	0.833383	0.5	0.5	3448	2624	2791	1705
130BC	F	Cre-	231	105	3978	Light	43752.6	3358.82	21.163	21.002	0.162	4.6	2802.69	0.04	0.29	0.25	6.2	0.834427	0.3	0.5	50	16	43	8
130BC	F	Cre-	285	105	4950	Dark	43753.2	3358.69	21.163	20.94	0.223	5.6	3049.31	0.046	0.319	0.273	7.6	0.907886	0.3	0.5	1344	704	1168	533
130BC	F	Cre-	239	105	4122	Light	43752.7	3357.56	21.163	21.032	0.132	4.7	2577.83	0.04	0.237	0.197	6.3	0.767769	0.2	0.5	35	13	44	20
130BC	F	Cre-	89	105	1422	Light	43750.8	3357.29	21.163	20.903	0.26	1.8	2943.31	0.041	0.365	0.324	2.3	0.876692	0.4	0.5	1465	827	1092	454
130BC	F	Cre-	207	105	3546	Dark	43752.3	3352.34	21.163	20.966	0.197	4.2	2933.93	0.043	0.306	0.263	5.5	0.875189	0.3	0.5	237	40	337	54
130BC	F	Cre-	238	105	4104	Light	43752.7	3351.44	21.163	21.027	0.136	4.7	3073.39	0.04	0.246	0.206	6.3	0.917034	0.2	0.5	162	80	132	61
130BC	F	Cre-	139	105	2322	Light	43751.4	3350.18	21.163	20.96	0.203	2.9	2533.97	0.041	0.329	0.288	3.7	0.756369	0.3	0.5	284	78	345	48
130BC	F	Cre-	258	105	4464	Dark	43752.9	3348.73	21.163	20.979	0.183	5	2948.35	0.044	0.3	0.256	6.8	0.88044	0.3	0.5	32	6	61	11
130BC	F	Cre-	213	105	3654	Light	43752.3	3345.53	21.163	20.967	0.195	4.3	2603.41	0.047	0.284	0.237	5.7	0.778175	0.3	0.5	167	20	107	37
130BC	F	Cre-	223	105	3834	Light	43752.5	3345.35	21.163	21.005	0.158	4.5	2901.09	0.045	0.259	0.215	6	0.867202	0.2	0.5	50	5	78	21
130BC	F	Cre-	100	105	1620	Dark	43750.9	3344.76	21.163	20.851	0.312	2	2743.6	0.043	0.385	0.343	2.6	0.820269	0.5	0.5	3186	2256	2444	1351
130BC	F	Cre-	209	105	3582	Dark	43752.3	3344.08	21.163	20.873	0.289	4.2	2866	0.046	0.407	0.36	5.6	0.857038	0.4	0.5	2562	1890	2015	1220
130BC	F	Cre-	79	105	1242	Light	43750.7	3341.86	21.163	21.013	0.15	1.6	2571.39	0.039	0.262	0.223	2	0.769448	0.2	0.5	38	11	34	9
130BC	F	Cre-	253	105	4374	Dark	43752.8	3338.25	21.163	20.885	0.278	4.9	2751.97	0.042	0.398	0.356	6.7	0.824376	0.4	0.5	1390	794	1023	471
130BC	F	Cre-	29	105	342	Dark	43750	3338.19	21.163	20.87	0.293	0.6	2800.31	0.045	0.401	0.356	0.7	0.838871	0.4	0.5	2693	1546	1561	707
130BC	F	Cre-	294	105	5112	Light	43753.4	3336.42	21.162	20.987	0.176	5.7	2753.61	0.051	0.302	0.252	7.8	0.825319	0.3	0.5	44	16	91	40
130BC	F	Cre-	3	105	NA	NA	43749.7	3332.46	21.163	20.883	0.28	0.1	2716.89	0.039	0.351	0.312	0.1	0.815281	0.4	0.5	3057	1957	2000	1006
130BC	F	Cre-	218	105	3744	Light	43752.4	3330.79	21.163	20.995	0.168	4.4	2869.3	0.047	0.304	0.257	5.8	0.861445	0.3	0.5	17	2	21	4
130BC	F	Cre-	148	105	2484	Light	43751.5	3330.35	21.163	20.95	0.213	3	2958.17	0.041	0.328	0.287	3.9	0.888248	0.3	0.5	1082	726	1075	584
130BC	F	Cre-	251	105	4338	Dark	43752.8	3326.58	21.163	20.965	0.198	4.9	2653.26	0.042	0.308	0.267	6.6	0.797595	0.3	0.5	232	58	346	130
130BC	F	Cre-	202	105	3456	Dark	43752.2	3325.78	21.163	20.941	0.222	4.1	3113.71	0.045	0.326	0.281	5.4	0.936235	0.3	0.5	19	1	12	2
130BC	F	Cre-	72	105	1116	Light	43750.6	3325.62	21.163	20.86	0.303	1.4	2555.25	0.04	0.359	0.319	1.9	0.768353	0.5	0.5	2819	1839	1883	977
130BC	F	Cre-	44	105	612	Dark	43750.2	3322.99	21.163	20.961	0.202	0.9	2465.49	0.046	0.317	0.271	1.2	0.741947	0.3	0.5	133	38	123	39
130BC	F	Cre-	75	105	1170	Light	43750.6	3322.97	21.163	20.939	0.225	1.5	2539.18	0.039	0.317	0.278	1.9	0.764129	0.3	0.5	522	149	536	151
130BC	F	Cre-	124	105	2052	Dark	43751.2	3322.23	21.163	20.995	0.168	2.6	2482.18	0.041	0.255	0.214	3.3	0.747145	0.3	0.5	87	50	57	18
130BC	F	Cre-	171	105	2898	Dark	43751.8	3322.02	21.163	20.986	0.177	3.4	2562.69	0.04	0.304	0.264	4.5	0.771425	0.3	0.5	80	43	66	33
130BC	F	Cre-	176	105	2988	Dark	43751.9	3318.44	21.163	20.938	0.225	3.5	2824.68	0.042	0.353	0.311	4.7	0.851207	0.3	0.5	1721	1045	1426	666
130BC	F	Cre-	234	105	4032	Light	43752.6	3316.37	21.163	20.91	0.253	4.6	2858.19	0.04	0.384	0.344	6.2	0.861841	0.4	0.5	629	263	663	176
130BC	F	Cre-	282	105	4896	Dark	43753.2	3316.2	21.163	20.855	0.308	5.5	2703.34	0.046	0.441	0.395	7.5	0.815194	0.5	0.5	3532	2589	2916	1837
130BC	F	Cre-	246	105	4248	Light	43752.8	3314.7	21.163	20.939	0.224	4.8	2527.62	0.041	0.368	0.327	6.5	0.76255	0.3	0.5	644	119	742	143
130BC	F	Cre-	36	105	468	Dark	43750.1	3314.27	21.163	20.856	0.307	0.8	2858.92	0.045	0.372	0.327	1	0.862611	0.5	0.5	2028	1131	1412	622
130BC	F	Cre-	12	105	36	Dark	43749.8	3312.86	21.163	20.856	0.307	0.3	2721.28	0.04	0.374	0.334	0.3	0.82143	0.5	0.5	2665	1605	1572	734
130BC	F	Cre-	248	105	4284	Light	43752.8	3310.04	21.163	20.978	0.185	4.8	2660.75	0.042	0.322	0.281	6.6	0.803843	0.3	0.5	516	205	463	156
130BC	F	Cre-	146	105	2448	Light	43751.5	3309.39	21.163	20.876	0.287	3	2887.78	0.04	0.365	0.324	3.9	0.872604	0.4	0.5	2772	2101	2356	1430
130BC	F	Cre-	197	105	3366	Dark	43752.1	3308.83	21.163	20.875	0.288	4	2920.14	0.045	0.37	0.325	5.3	0.882529	0.4	0.5	2929	1966	2427	1462
130BC	F	Cre-	13	105	54	Dark	43749.8	3308.53	21.163	20.886	0.277	0.3	2806.62	0.041	0.349	0.308	0.3	0.848297	0.4	0.5	3240	2103	2130	1088
130BC	F	Cre-	91	105	1458	Dark	43750.8	3308.29	21.163	21.007	0.157	1.8	2952.14	0.041	0.248	0.207	2.4	0.892345	0.2	0.5	24	3	27	9
130BC	F	Cre-	219	105	3762	Light	43752.4	3304.38	21.162	20.946	0.217	4.4	2624.01	0.049	0.35	0.302	5.9	0.7941	0.3	0.5	516	213	392	145
130BC	F	Cre-	53	105	774	Light	43750.3	3304.08	21.163	20.908	0.255	1.1	2601.53	0.045	0.363	0.318	1.4	0.787366	0.4	0.5	1546	706	1088	427
130BC	F	Cre-	162	105	2736	Light	43751.7	3302.6	21.163	20.894	0.269	3.3	3102.48	0.04	0.358	0.317	4.3	0.939406	0.4	0.5	2824	2029	2312	1347
130BC	F	Cre-	86	105	1368	Light	43750.8	3302.03	21.163	20.905	0.258	1.7	2788.74	0.04	0.345	0.305	2.2	0.844554	0.4	0.5	463	149	385	122
130BC	F	Cre-	211	105	3618	Light	43752.3	3301.7	21.163	20.958	0.205	4.3	2451.46	0.048	0.326	0.278	5.7	0.742485	0.3	0.5	1772	1217	1321	659
130BC	F	Cre-	24	105	252	Dark	43750	3300.29	21.163	20.908	0.255	0.5	2555.34	0.045	0.377	0.332	0.6	0.774277	0.4	0.5	815	204	504	133
130BC	F	Cre-	153	105	2574	Light	43751.6	3298.53	21.163	20.985	0.178	3.1	2589.74	0.042	0.308	0.266	4.1	0.785121	0.3	0.5	90	7	153	19
130BC	F	Cre-	276	105	4788	Dark	43753.1	3297.31	21.163	20.912	0.251	5.4	3020.04	0.046	0.359	0.312	7.4	0.915912	0.4	0.5	968	458	925	387
130BC	F	Cre-	271	105	4698	Dark	43753.1	3293.27	21.163	20.864	0.298	5.3	2548.31	0.046	0.427	0.381	7.2	0.773794	0.5	0.5	3060	2273	2580	1677
130BC	F	Cre-	161	105	2718	Light	43751.7	3292.89	21.163	20.914	0.25	3.3	2536.13	0.04	0.37	0.329	4.3	0.770183	0.4	0.5	2021	1413	1621	861
130BC	F	Cre-	167	105	2826	Light	43751.8	3289.4	21.163	21.011	0.152	3.4	2900.18	0.04	0.282	0.242	4.4	0.881672	0.2	0.5	183	85	154	78
130BC	F	Cre-	147	105	2466	Light	43751.5	3286.83	21.163	20.934	0.23	3	2595.72	0.041	0.317	0.276	3.9	0.789734	0.4	0.5	2677	1892	2319	1364
130BC	F	Cre-	149	105	2502	Light	43751.5	3286.24	21.163	20.978	0.185	3.1	2798.35	0.041	0.304	0.263	4	0.851534	0.3	0.5	32	10	25	7
130BC	F	Cre-	245	105	4230	Light	43752.7	3286.19	21.163	21.027	0.137	4.8	2613.2	0.041	0.248	0.208	6.5	0.795208	0.2	0.5	17	2	29	13
130BC	F	Cre-	187	105	3186	Dark	43752	3286.09	21.163	20.894	0.269	3.7	2822.12	0.044	0.397	0.353	5	0.858807	0.4	0.5	309	133	185	80
130BC	F	Cre-	17	105	126	Dark	43749.9	3282.07	21.163	20.893	0.27	0.4	2719.75	0.043	0.352	0.309	0.4	0.828668	0.4	0.5	2155	1225	1497	613
130BC	F	Cre-	80	105	1260	Light	43750.7	3280.43	21.163	21.008	0.156	1.6	2788.07	0.039	0.264	0.225	2	0.849909	0.2	0.5	14	7	36	10
130BC	F	Cre-	241	105	4158	Light	43752.7	3278.32	21.163	20.913	0.251	4.7	2786	0.04	0.386	0.346	6.4	0.849826	0.4	0.5	1918	1292	1668	878
130BC	F	Cre-	25	105	270	Dark	43750	3274.07	21.162	21.004	0.158	0.5	2785.56	0.045	0.281	0.236	0.6	0.850795	0.2	0.5	245	54	60	31
130BC	F	Cre-	158	105	2664	Light	43751.7	3273.07	21.163	20.999	0.165	3.2	2659.57	0.04	0.276	0.236	4.2	0.812562	0.3	0.5	99	49	164	59
130BC	F	Cre-	93	105	1494	Dark	43750.8	3272.29	21.163	20.977	0.186	1.8	2782.65	0.041	0.312	0.271	2.4	0.850368	0.3	0.5	143	52	106	49
130BC	F	Cre-	33	105	414	Dark	43750.1	3271.64	21.163	20.853	0.31	0.7	2895.37	0.046	0.386	0.341	0.9	0.884989	0.5	0.5	3907	2884	2530	1466
130BC	F	Cre-	150	105	2520	Light	43751.6	3269.55	21.163	21.006	0.157	3.1	2717.18	0.042	0.274	0.232	4	0.831055	0.2	0.5	123	75	130	68
130BC	F	Cre-	243	105	4194	Light	43752.7	3268.94	21.163	21.007	0.156	4.8	2596.59	0.041	0.278	0.237	6.4	0.794324	0.2	0.5	19	9	46	22
130BC	F	Cre-	165	105	2790	Light	43751.7	3263.06	21.163	20.991	0.172	3.3	2828.72	0.041	0.296	0.255	4.4	0.866891	0.3	0.5	90	35	95	26
130BC	F	Cre-	295	105	5130	Light	43753.4	3262.44	21.162	20.939	0.224	5.8	2641.13	0.05	0.344	0.294	7.9	0.809557	0.3	0.5	1485	860	1294	601
130BC	F	Cre-	236	105	4068	Light	43752.6	3261.89	21.163	20.997	0.166	4.7	2843.68	0.04	0.28	0.24	6.3	0.87179	0.3	0.5	28	6	20	11
130BC	F	Cre-	137	105	2286	Light	43751.4	3261.05	21.163	21.015	0.148	2.8	2875.53	0.041	0.242	0.201	3.7	0.88178	0.2	0.5	118	11	136	40
130BC	F	Cre-	105	105	1710	Dark	43751	3259.76	21.163	20.82	0.343	2.1	3048.77	0.044	0.433	0.389	2.8	0.935274	0.5	0.5	3413	2542	2840	1793
130BC	F	Cre-	203	105	3474	Dark	43752.2	3259	21.163	20.871	0.291	4.1	2806.17	0.045	0.396	0.351	5.4	0.861054	0.4	0.5	518	320	485	217
130BC	F	Cre-	37	105	486	Dark	43750.1	3258.87	21.163	20.898	0.264	0.8	3041.52	0.046	0.36	0.314	1	0.933305	0.4	0.5	2703	1706	1925	989
130BC	F	Cre-	34	105	432	Dark	43750.1	3257.05	21.163	20.866	0.297	0.7	2893.4	0.046	0.362	0.316	0.9	0.888351	0.5	0.5	3572	2438	2314	1260
130BC	F	Cre-	6	105	NA	NA	43749.8	3255.86	21.163	20.892	0.271	0.1	2436.44	0.038	0.357	0.318	0.1	0.748325	0.4	0.5	3015	2000	1897	928
130BC	F	Cre-	173	105	2934	Dark	43751.8	3254.68	21.163	21.021	0.142	3.4	2640.85	0.041	0.258	0.217	4.6	0.8114	0.2	0.5	50	18	38	18
130BC	F	Cre-	98	105	1584	Dark	43750.9	3253.12	21.163	20.849	0.314	1.9	2722.85	0.042	0.419	0.378	2.5	0.836997	0.5	0.5	2829	1963	1813	970
130BC	F	Cre-	47	105	666	Dark	43750.3	3251.24	21.163	20.961	0.202	1	2506.09	0.045	0.3	0.256	1.2	0.770809	0.3	0.5	763	121	593	126
130BC	F	Cre-	154	105	2592	Light	43751.6	3250.74	21.163	20.993	0.171	3.1	2508.96	0.041	0.289	0.248	4.1	0.771813	0.3	0.5	9	1	23	5
130BC	F	Cre-	192	105	3276	Dark	43752.1	3249.19	21.163	20.882	0.281	3.8	2477.38	0.044	0.361	0.317	5.1	0.762461	0.4	0.5	3086	2329	2537	1638
130BC	F	Cre-	262	105	4536	Dark	43753	3249.16	21.163	20.881	0.282	5.1	3064.4	0.044	0.427	0.383	6.9	0.943138	0.4	0.5	399	92	450	122
130BC	F	Cre-	260	105	4500	Dark	43752.9	3248.47	21.163	20.988	0.175	5	2560.93	0.045	0.315	0.27	6.9	0.78835	0.3	0.5	170	77	118	52
130BC	F	Cre-	184	105	3132	Dark	43752	3242.9	21.163	20.976	0.187	3.7	3013.55	0.042	0.319	0.277	4.9	0.929277	0.3	0.5	147	49	141	37
130BC	F	Cre-	77	105	1206	Light	43750.6	3242.75	21.163	20.915	0.248	1.5	2414.37	0.039	0.349	0.31	2	0.744546	0.4	0.5	387	174	286	104
130BC	F	Cre-	198	105	3384	Dark	43752.2	3241.59	21.163	20.904	0.259	4	2455.06	0.045	0.333	0.288	5.3	0.757363	0.4	0.5	2758	1947	2398	1499
130BC	F	Cre-	27	105	306	Dark	43750	3237.63	21.163	20.887	0.276	0.5	2885.05	0.045	0.4	0.355	0.7	0.891102	0.4	0.5	618	145	281	73
130BC	F	Cre-	19	105	162	Dark	43749.9	3228.76	21.163	21.004	0.159	0.4	2603.65	0.044	0.274	0.23	0.5	0.806396	0.2	0.5	684	343	461	167
130BC	F	Cre-	97	105	1566	Dark	43750.9	3227.64	21.163	20.873	0.29	1.9	2542.15	0.041	0.415	0.374	2.5	0.787618	0.4	0.5	491	97	485	96
130BC	F	Cre-	133	105	2214	Light	43751.3	3227.04	21.163	20.909	0.254	2.8	2699.7	0.041	0.356	0.315	3.5	0.836587	0.4	0.5	2088	1386	1820	927
130BC	F	Cre-	152	105	2556	Light	43751.6	3226.73	21.163	20.946	0.217	3.1	2921.39	0.041	0.35	0.31	4.1	0.905373	0.3	0.5	2209	1706	1848	1093
130BC	F	Cre-	216	105	3708	Light	43752.4	3225.33	21.163	20.913	0.25	4.3	2602.17	0.048	0.381	0.334	5.8	0.806793	0.4	0.5	2074	1368	1577	833
130BC	F	Cre-	174	105	2952	Dark	43751.9	3223.62	21.163	20.865	0.298	3.4	2481.35	0.041	0.439	0.398	4.6	0.769741	0.5	0.5	662	259	649	219
130BC	F	Cre-	57	105	846	Light	43750.4	3223.43	21.163	21.019	0.144	1.2	2679.4	0.044	0.257	0.213	1.5	0.831225	0.2	0.5	74	12	129	31
130BC	F	Cre-	280	105	4860	Dark	43753.2	3223.26	21.163	20.934	0.228	5.5	3055.13	0.047	0.326	0.279	7.5	0.94784	0.3	0.5	108	22	148	37
130BC	F	Cre-	273	105	4734	Dark	43753.1	3221.6	21.163	20.873	0.29	5.3	2704.84	0.045	0.371	0.326	7.3	0.839595	0.4	0.5	2953	2172	2368	1453
130BC	F	Cre-	135	105	2250	Light	43751.4	3221.56	21.163	20.857	0.306	2.8	2930.35	0.046	0.38	0.334	3.6	0.909605	0.5	0.5	2701	2064	2349	1486
130BC	F	Cre-	272	105	4716	Dark	43753.1	3218.07	21.163	20.89	0.273	5.3	2658.61	0.045	0.388	0.343	7.3	0.826151	0.4	0.5	2074	1346	1886	1051
130BC	F	Cre-	143	105	2394	Light	43751.5	3217.63	21.163	20.865	0.298	2.9	2607.53	0.041	0.426	0.385	3.8	0.810388	0.5	0.5	393	150	466	118
130BC	F	Cre-	175	105	2970	Dark	43751.9	3216.19	21.163	20.872	0.291	3.5	2404.78	0.042	0.423	0.382	4.6	0.747709	0.4	0.5	3399	2613	2776	1751
130BC	F	Cre-	212	105	3636	Light	43752.3	3213.85	21.163	20.921	0.242	4.3	2797.62	0.048	0.34	0.293	5.7	0.870489	0.4	0.5	2136	1508	1858	1024
130BC	F	Cre-	43	105	594	Dark	43750.2	3213.35	21.163	20.983	0.18	0.9	2897.28	0.047	0.296	0.25	1.1	0.901638	0.3	0.5	100	46	70	26
130BC	F	Cre-	249	105	4302	Light	43752.8	3213.22	21.163	20.984	0.179	4.8	2813.69	0.042	0.319	0.277	6.6	0.87566	0.3	0.5	11	5	11	4
130BC	F	Cre-	65	105	990	Light	43750.5	3210.45	21.163	21.019	0.144	1.3	2674.64	0.041	0.261	0.22	1.7	0.833105	0.2	0.5	109	42	92	21
130BC	F	Cre-	107	105	1746	Dark	43751	3210.06	21.163	20.848	0.315	2.2	2537.8	0.043	0.381	0.338	2.8	0.79058	0.5	0.5	2400	1541	2052	1121
130BC	F	Cre-	112	105	1836	Dark	43751.1	3209.24	21.163	20.907	0.256	2.3	2479.66	0.042	0.329	0.287	3	0.772664	0.4	0.5	644	141	599	170
130BC	F	Cre-	287	105	4986	Dark	43753.3	3207.07	21.162	20.966	0.196	5.6	2719.38	0.048	0.284	0.236	7.7	0.847932	0.3	0.5	71	4	105	34
130BC	F	Cre-	123	105	2034	Dark	43751.2	3205.3	21.163	20.908	0.255	2.6	2850.46	0.042	0.34	0.298	3.3	0.889296	0.4	0.5	812	249	813	253
130BC	F	Cre-	201	105	3438	Dark	43752.2	3201.8	21.163	20.958	0.205	4	2850.17	0.045	0.309	0.264	5.4	0.890178	0.3	0.5	122	19	201	68
130BC	F	Cre-	31	105	378	Dark	43750.1	3199.59	21.163	20.843	0.32	0.6	2765.46	0.045	0.4	0.355	0.8	0.864318	0.5	0.5	4047	2949	2425	1413
130BC	F	Cre-	111	105	1818	Dark	43751.1	3199.17	21.163	20.879	0.284	2.3	2698.11	0.042	0.373	0.331	3	0.843379	0.4	0.5	1815	1046	1575	806
130BC	F	Cre-	106	105	1728	Dark	43751	3198.09	21.163	20.854	0.309	2.2	2516.07	0.045	0.388	0.343	2.8	0.786741	0.5	0.5	2665	1856	2279	1352
130BC	F	Cre-	222	105	3816	Light	43752.5	3197.24	21.163	20.947	0.216	4.5	2665.58	0.047	0.313	0.266	5.9	0.833712	0.3	0.5	1319	865	1185	600
130BC	F	Cre-	183	105	3114	Dark	43752	3196.11	21.163	20.973	0.19	3.6	2727.89	0.042	0.304	0.262	4.9	0.853503	0.3	0.5	68	30	48	22
130BC	F	Cre-	48	105	684	Dark	43750.3	3194.91	21.163	20.906	0.257	1	2661.02	0.044	0.349	0.305	1.3	0.832895	0.4	0.5	163	58	144	53
130BC	F	Cre-	257	105	4446	Dark	43752.9	3194.39	21.163	20.993	0.17	5	2717.23	0.043	0.295	0.252	6.8	0.850624	0.3	0.5	37	4	49	24
130BC	F	Cre-	62	105	936	Light	43750.5	3193.06	21.163	21.009	0.154	1.3	2744.07	0.042	0.262	0.22	1.6	0.859386	0.2	0.5	52	2	224	30
130BC	F	Cre-	83	105	1314	Light	43750.7	3192.85	21.163	20.899	0.264	1.7	2794.35	0.039	0.374	0.336	2.1	0.875189	0.4	0.5	1874	1137	1572	721
130BC	F	Cre-	269	105	4662	Dark	43753	3189.18	21.163	20.85	0.313	5.2	2580.9	0.045	0.418	0.373	7.2	0.809269	0.5	0.5	2321	1699	2058	1269
130BC	F	Cre-	301	105	5238	Light	43753.4	3186.48	21.163	20.885	0.278	5.9	2486.67	0.044	0.395	0.35	8	0.780381	0.4	0.5	488	217	476	172
130BC	F	Cre-	41	105	558	Dark	43750.2	3184.23	21.163	20.913	0.25	0.9	2399.15	0.046	0.351	0.305	1.1	0.753448	0.4	0.5	560	153	441	101
130BC	F	Cre-	85	105	1350	Light	43750.7	3180.66	21.163	21.01	0.153	1.7	2816.12	0.04	0.235	0.195	2.2	0.885387	0.2	0.5	56	32	52	13
130BC	F	Cre-	170	105	2880	Dark	43751.8	3180.42	21.163	20.986	0.177	3.4	2540.01	0.04	0.312	0.272	4.5	0.798642	0.3	0.5	63	31	55	12
130BC	F	Cre-	70	105	1080	Light	43750.6	3179.17	21.163	20.835	0.328	1.4	2618.57	0.04	0.403	0.363	1.8	0.823665	0.5	0.5	2990	2020	2058	1041
130BC	F	Cre-	300	105	5220	Light	43753.4	3179.09	21.163	21.014	0.148	5.8	2369.33	0.047	0.256	0.208	8	0.745285	0.2	0.5	154	61	135	40
130BC	F	Cre-	84	105	1332	Light	43750.7	3179.09	21.163	21.006	0.158	1.7	2801.8	0.039	0.252	0.213	2.2	0.881321	0.2	0.5	341	65	460	110
130BC	F	Cre-	297	105	5166	Light	43753.4	3177.87	21.162	20.995	0.168	5.8	2567.2	0.05	0.277	0.227	7.9	0.807839	0.3	0.5	716	396	755	307
130BC	F	Cre-	190	105	3240	Dark	43752.1	3175.53	21.163	20.851	0.312	3.8	3008.99	0.044	0.439	0.396	5.1	0.947555	0.5	0.5	3409	2531	2873	1819
130BC	F	Cre-	228	105	3924	Light	43752.5	3173.2	21.163	20.963	0.2	4.5	2891.7	0.04	0.331	0.291	6.1	0.911288	0.3	0.5	669	447	717	331
130BC	F	Cre-	81	105	1278	Light	43750.7	3172.63	21.163	20.826	0.338	1.6	2851.97	0.039	0.454	0.415	2.1	0.898928	0.5	0.5	1585	1033	1000	490
130BC	F	Cre-	67	105	1026	Light	43750.5	3170.56	21.163	20.997	0.166	1.3	2771.21	0.041	0.268	0.228	1.7	0.874046	0.3	0.5	38	18	60	22
130BC	F	Cre-	55	105	810	Light	43750.4	3167.51	21.162	20.893	0.269	1.2	2905.58	0.051	0.36	0.308	1.4	0.917308	0.4	0.5	1470	926	1124	543
130BC	F	Cre-	121	105	1998	Dark	43751.2	3165.11	21.163	20.847	0.316	2.5	2785.39	0.041	0.4	0.359	3.2	0.880029	0.5	0.5	1033	644	913	446
130BC	F	Cre-	101	105	1638	Dark	43750.9	3165.05	21.163	20.849	0.314	2	2763.54	0.043	0.373	0.331	2.6	0.873143	0.5	0.5	3212	2264	2407	1386
130BC	F	Cre-	283	105	4914	Dark	43753.2	3165.01	21.163	20.912	0.251	5.5	2959.94	0.047	0.38	0.334	7.6	0.935208	0.4	0.5	2097	1345	1660	952
130BC	F	Cre-	40	105	540	Dark	43750.2	3163.62	21.163	20.982	0.181	0.9	2555.7	0.045	0.292	0.246	1.1	0.807839	0.3	0.5	130	31	98	22
130BC	F	Cre-	179	105	3042	Dark	43751.9	3161.67	21.163	20.912	0.251	3.6	2752.35	0.042	0.364	0.322	4.7	0.870537	0.4	0.5	2078	1420	1860	1041
130BC	F	Cre-	26	105	288	Dark	43750	3160.28	21.163	21.001	0.162	0.5	2540.03	0.045	0.281	0.236	0.7	0.803736	0.3	0.5	143	66	94	41
130BC	F	Cre-	120	105	1980	Dark	43751.2	3156.86	21.163	20.971	0.192	2.5	2733.28	0.042	0.271	0.229	3.2	0.865824	0.3	0.5	546	155	578	129
130BC	F	Cre-	278	105	4824	Dark	43753.2	3156.19	21.163	20.978	0.185	5.4	2734.94	0.047	0.282	0.235	7.4	0.866532	0.3	0.5	25	2	45	17
130BC	F	Cre-	156	105	2628	Light	43751.6	3155.81	21.163	20.996	0.167	3.2	2771.81	0.041	0.287	0.246	4.2	0.878317	0.3	0.5	35	10	42	14
130BC	F	Cre-	296	105	5148	Light	43753.4	3153.81	21.162	20.951	0.211	5.8	3073.99	0.051	0.316	0.266	7.9	0.974691	0.3	0.5	654	274	762	276
130BC	F	Cre-	68	105	1044	Light	43750.5	3152.02	21.163	20.98	0.183	1.3	2623.4	0.04	0.289	0.249	1.7	0.832291	0.3	0.5	78	13	78	18
130BC	F	Cre-	11	105	18	Dark	43749.8	3149.11	21.163	20.896	0.267	0.2	3026.63	0.04	0.352	0.312	0.3	0.961104	0.4	0.5	2217	1208	1506	636
130BC	F	Cre-	88	105	1404	Light	43750.8	3148.94	21.163	20.889	0.274	1.8	2656.75	0.041	0.392	0.352	2.3	0.843697	0.4	0.5	1552	755	1281	455
130BC	F	Cre-	200	105	3420	Dark	43752.2	3143.52	21.163	20.891	0.272	4	2530.94	0.045	0.353	0.308	5.4	0.805128	0.4	0.5	1169	695	1134	552
130BC	F	Cre-	159	105	2682	Light	43751.7	3134.62	21.163	20.886	0.277	3.2	2935.74	0.04	0.412	0.372	4.2	0.936554	0.4	0.5	835	332	509	173
130BC	F	Cre-	64	105	972	Light	43750.5	3130.95	21.163	20.981	0.182	1.3	2643.15	0.041	0.287	0.246	1.6	0.844202	0.3	0.5	123	37	118	27
130BC	F	Cre-	226	105	3888	Light	43752.5	3129.8	21.163	21.009	0.154	4.5	2525.05	0.041	0.289	0.248	6	0.806776	0.2	0.5	10	3	28	9
130BC	F	Cre-	205	105	3510	Dark	43752.2	3127.1	21.163	20.873	0.29	4.1	2731.36	0.043	0.398	0.354	5.5	0.873449	0.4	0.5	2559	1647	2079	1171
130BC	F	Cre-	279	105	4842	Dark	43753.2	3124.99	21.163	21.002	0.16	5.5	2686.28	0.047	0.264	0.217	7.4	0.859614	0.2	0.5	103	55	107	37
130BC	F	Cre-	39	105	522	Dark	43750.2	3113.65	21.163	20.973	0.19	0.8	2947.32	0.045	0.286	0.242	1	0.946583	0.3	0.5	107	24	53	16
130BC	F	Cre-	45	105	630	Dark	43750.2	3107.93	21.163	20.841	0.322	1	2607.62	0.046	0.412	0.366	1.2	0.839023	0.5	0.5	2662	1667	1780	784
130BC	F	Cre-	189	105	3222	Dark	43752	3103.53	21.163	20.857	0.306	3.8	2625.84	0.044	0.438	0.395	5	0.846083	0.5	0.5	4253	3436	3447	2279
130BC	F	Cre-	113	105	1854	Dark	43751.1	3102.14	21.163	20.991	0.172	2.3	2585.53	0.042	0.289	0.247	3	0.833466	0.3	0.5	687	191	492	140
130BC	F	Cre-	119	105	1962	Dark	43751.2	3096.24	21.163	20.88	0.283	2.5	2850.71	0.042	0.361	0.319	3.2	0.920701	0.4	0.5	2499	1730	2191	1311
130BC	F	Cre-	20	105	180	Dark	43749.9	3094.79	21.163	20.992	0.17	0.4	2589.99	0.044	0.265	0.221	0.5	0.836889	0.3	0.5	335	122	257	62
130BC	F	Cre-	1	105	NA	NA	43749.7	3093.3	21.163	20.865	0.297	0	2921.56	0.044	0.361	0.317	0	0.944479	0.5	0.5	1872	1185	1280	575
130BC	F	Cre-	128	105	2124	Dark	43751.3	3088.81	21.163	20.994	0.169	2.7	2688.44	0.041	0.283	0.242	3.4	0.870381	0.3	0.5	83	30	106	41
130BC	F	Cre-	225	105	3870	Light	43752.5	3086.85	21.163	20.952	0.211	4.5	2478.3	0.042	0.329	0.287	6	0.802858	0.3	0.5	363	156	290	93
130BC	F	Cre-	90	105	1440	Dark	43750.8	3078.54	21.163	20.979	0.185	1.8	2952.16	0.041	0.279	0.238	2.3	0.958949	0.3	0.5	220	36	379	87
130BC	F	Cre-	194	105	3312	Dark	43752.1	3078.02	21.163	20.877	0.286	3.9	2665.02	0.045	0.348	0.303	5.2	0.865821	0.4	0.5	3112	2339	2512	1634
130BC	F	Cre-	141	105	2358	Light	43751.4	3072.4	21.163	20.994	0.169	2.9	2479.52	0.041	0.301	0.26	3.8	0.807032	0.3	0.5	45	15	66	19
130BC	F	Cre-	185	105	3150	Dark	43752	3060.91	21.163	20.982	0.181	3.7	2595.62	0.042	0.321	0.279	4.9	0.847991	0.3	0.5	66	41	56	20
130BC	F	Cre-	188	105	3204	Dark	43752	3056.65	21.163	20.871	0.292	3.7	2490.97	0.042	0.429	0.386	5	0.814935	0.4	0.5	2488	1809	2186	1229
130BC	F	Cre-	206	105	3528	Dark	43752.3	3052.46	21.163	20.922	0.241	4.2	2491.54	0.043	0.348	0.305	5.5	0.816241	0.4	0.5	1295	710	1293	585
130BC	F	Cre-	35	105	450	Dark	43750.1	3045.93	21.163	20.874	0.289	0.8	2494.07	0.045	0.347	0.301	0.9	0.818819	0.4	0.5	2386	1546	1556	812
130BC	F	Cre-	14	105	72	Dark	43749.9	3044.57	21.163	20.921	0.242	0.3	2579.14	0.041	0.308	0.267	0.4	0.847127	0.4	0.5	2569	1597	1738	823
130BC	F	Cre-	221	105	3798	Light	43752.4	3043.81	21.163	20.896	0.266	4.4	2602.86	0.046	0.367	0.321	5.9	0.855133	0.4	0.5	485	271	485	190
130BC	F	Cre-	18	105	144	Dark	43749.9	3043.08	21.163	20.963	0.2	0.4	2671.74	0.044	0.284	0.241	0.5	0.877974	0.3	0.5	1055	522	657	212
130BC	F	Cre-	58	105	864	Light	43750.4	3038.16	21.163	21.01	0.153	1.2	2519.96	0.044	0.27	0.226	1.5	0.829435	0.2	0.5	49	31	32	15
130BC	F	Cre-	233	105	4014	Light	43752.6	3030.75	21.163	20.983	0.18	4.6	2509.14	0.04	0.293	0.253	6.2	0.827895	0.3	0.5	372	135	373	94
130BC	F	Cre-	103	105	1674	Dark	43751	3022.14	21.163	20.811	0.352	2.1	2693.83	0.044	0.435	0.391	2.7	0.891363	0.5	0.5	3170	2305	2524	1516
130BC	F	Cre-	227	105	3906	Light	43752.5	3021.22	21.163	20.879	0.284	4.5	2421.36	0.041	0.426	0.385	6.1	0.801449	0.4	0.5	1093	700	873	393
130BC	F	Cre-	268	105	4644	Dark	43753	3019.01	21.163	20.875	0.288	5.2	2727.95	0.046	0.367	0.321	7.1	0.903589	0.4	0.5	2844	2071	2402	1510
130BC	F	Cre-	32	105	396	Dark	43750.1	3015.69	21.163	20.86	0.303	0.7	2695.24	0.045	0.366	0.321	0.8	0.89374	0.5	0.5	3265	2248	2205	1171
130BC	F	Cre-	177	105	3006	Dark	43751.9	3002.23	21.163	20.901	0.262	3.5	2626.07	0.042	0.356	0.314	4.7	0.874705	0.4	0.5	1726	1154	1493	814
130BC	F	Cre-	7	105	NA	NA	43749.8	3001.41	21.163	20.893	0.27	0.1	2589.89	0.039	0.339	0.3	0.2	0.862892	0.4	0.5	2643	1632	1815	865
130BC	F	Cre-	92	105	1476	Dark	43750.8	2998.87	21.163	20.94	0.223	1.8	3078.83	0.041	0.33	0.289	2.4	1.02666	0.3	0.5	322	99	316	73
130BC	F	Cre-	49	105	702	Dark	43750.3	2998.77	21.163	20.885	0.278	1	2946.86	0.045	0.389	0.343	1.3	0.98269	0.4	0.5	2445	1578	1715	879
130BC	F	Cre-	195	105	3330	Dark	43752.1	2996.39	21.163	20.857	0.306	3.9	2878.89	0.045	0.397	0.352	5.2	0.960784	0.5	0.5	3192	2441	2903	1884
130BC	F	Cre-	220	105	3780	Light	43752.4	2995.59	21.163	20.925	0.237	4.4	2909.56	0.046	0.365	0.319	5.9	0.97128	0.4	0.5	2297	1543	1894	1012
130BC	F	Cre-	244	105	4212	Light	43752.7	2991.06	21.163	21.02	0.143	4.8	2601.51	0.04	0.26	0.219	6.5	0.869763	0.2	0.5	15	1	29	11
130BC	F	Cre-	69	105	1062	Light	43750.5	2988.48	21.163	20.852	0.312	1.4	2905.8	0.04	0.395	0.355	1.8	0.972333	0.5	0.5	1784	1053	1241	536
130BC	F	Cre-	299	105	5202	Light	43753.4	2981.74	21.163	20.99	0.173	5.8	2465.24	0.047	0.284	0.236	8	0.82678	0.3	0.5	385	112	326	99
130BC	F	Cre-	50	105	720	Light	43750.3	2971.42	21.163	21.009	0.154	1.1	2651.09	0.045	0.262	0.216	1.3	0.892195	0.2	0.5	437	102	488	116
130BC	F	Cre-	235	105	4050	Light	43752.6	2970.8	21.163	20.99	0.173	4.6	2607.55	0.04	0.296	0.256	6.3	0.877727	0.3	0.5	1098	695	865	450
130BC	F	Cre-	250	105	4320	Dark	43752.8	2959.87	21.163	21	0.163	4.9	2650.9	0.041	0.285	0.244	6.6	0.895617	0.3	0.5	61	27	78	46
130BC	F	Cre-	252	105	4356	Dark	43752.8	2954.78	21.163	20.991	0.172	4.9	2739.03	0.042	0.273	0.231	6.7	0.92698	0.3	0.5	13	1	13	4
130BC	F	Cre-	265	105	4590	Dark	43753	2947.9	21.163	20.845	0.317	5.1	2799.12	0.045	0.444	0.398	7	0.949528	0.5	0.5	4124	3206	3212	2050
130BC	F	Cre-	51	105	738	Light	43750.3	2944.9	21.163	20.994	0.169	1.1	2764.83	0.045	0.27	0.225	1.3	0.938854	0.3	0.5	166	78	102	36
130BC	F	Cre-	196	105	3348	Dark	43752.1	2944.75	21.163	20.869	0.294	3.9	3026.44	0.045	0.392	0.348	5.2	1.02774	0.4	0.5	3025	2229	2722	1664
130BC	F	Cre-	63	105	954	Light	43750.5	2941.11	21.163	20.993	0.17	1.3	2558.77	0.042	0.274	0.232	1.6	0.87	0.3	0.5	79	19	69	19
130BC	F	Cre-	255	105	4410	Dark	43752.9	2940.89	21.163	20.891	0.272	5	2702.12	0.042	0.396	0.354	6.7	0.91881	0.4	0.5	1323	748	1148	464
130BC	F	Cre-	214	105	3672	Light	43752.4	2933.65	21.163	20.986	0.177	4.3	2609.48	0.048	0.269	0.222	5.7	0.889499	0.3	0.5	96	47	90	33
130BC	F	Cre-	240	105	4140	Light	43752.7	2924.2	21.163	20.935	0.228	4.7	2433.85	0.04	0.365	0.326	6.4	0.832316	0.4	0.5	471	171	519	133
130BC	F	Cre-	224	105	3852	Light	43752.5	2920.84	21.163	20.992	0.171	4.5	2909.87	0.045	0.269	0.224	6	0.996244	0.3	0.5	81	8	87	23
130BC	F	Cre-	10	105	0	Dark	43749.8	2919.97	21.163	20.908	0.255	0.2	2853.55	0.039	0.324	0.285	0.2	0.977254	0.4	0.5	3597	2533	2261	1285
130BC	F	Cre-	16	105	108	Dark	43749.9	2891.14	21.163	20.897	0.266	0.4	2558.74	0.043	0.358	0.315	0.4	0.885029	0.4	0.5	3045	2003	1911	958
130BC	F	Cre-	56	105	828	Light	43750.4	2823.99	21.163	21.011	0.152	1.2	2882.87	0.045	0.253	0.208	1.5	1.02085	0.2	0.5	752	325	723	235
130BC	F	Cre-	15	105	90	Dark	43749.9	2623.05	21.163	20.878	0.285	0.3	2437.37	0.042	0.368	0.326	0.4	0.92921	0.4	0.5	2132	1232	1257	550
130BC	F	Cre-	108	105	1764	Dark	43751	2610.54	21.163	20.855	0.308	2.2	2701.37	0.043	0.41	0.367	2.9	1.03479	0.5	0.5	2954	2012	2371	1408
131RC	F	Cre-	105	108	1728	Dark	43751	4675.94	21.163	20.856	0.307	2.1	3564.85	0.044	0.386	0.342	2.8	0.762382	0.5	0.5	1717	1097	1465	691
131RC	F	Cre-	166	108	2826	Light	43751.8	4357.23	21.163	20.904	0.259	3.3	3190.28	0.04	0.387	0.347	4.4	0.732182	0.4	0.5	1459	927	1081	540
131RC	F	Cre-	22	108	234	Dark	43750	4326.68	21.163	20.963	0.2	0.5	3484.92	0.044	0.315	0.271	0.6	0.805448	0.3	0.5	234	67	297	96
131RC	F	Cre-	88	108	1422	Light	43750.8	4269.61	21.163	20.904	0.26	1.8	3534.86	0.041	0.378	0.338	2.3	0.827911	0.4	0.5	509	288	467	204
131RC	F	Cre-	84	108	1350	Light	43750.7	4256.92	21.163	20.911	0.252	1.7	3211.21	0.039	0.375	0.336	2.2	0.754351	0.4	0.5	1058	546	966	402
131RC	F	Cre-	150	108	2538	Light	43751.6	4249.27	21.163	20.928	0.236	3	3247.08	0.042	0.37	0.328	4	0.76415	0.4	0.5	387	134	189	53
131RC	F	Cre-	18	108	162	Dark	43749.9	4168.83	21.163	20.837	0.326	0.4	3117.38	0.044	0.373	0.33	0.5	0.747783	0.5	0.5	2414	1574	1863	906
131RC	F	Cre-	139	108	2340	Light	43751.4	4132.26	21.163	21.034	0.13	2.9	3161.98	0.041	0.234	0.193	3.7	0.765194	0.2	0.5	17	3	23	9
131RC	F	Cre-	160	108	2718	Light	43751.7	4129.25	21.163	20.999	0.164	3.2	3514.18	0.04	0.282	0.241	4.2	0.851046	0.3	0.5	22	7	9	0
131RC	F	Cre-	282	108	4914	Dark	43753.2	4112.15	21.163	20.873	0.29	5.8	3480.13	0.046	0.362	0.316	7.8	0.846305	0.4	0.5	559	279	485	180
131RC	F	Cre-	153	108	2592	Light	43751.6	4067.47	21.163	20.843	0.32	3.1	3272.76	0.042	0.457	0.416	4	0.804618	0.5	0.5	1281	881	1086	498
131RC	F	Cre-	26	108	306	Dark	43750	4028.53	21.163	20.839	0.324	0.6	3406.21	0.045	0.403	0.358	0.7	0.845521	0.5	0.5	2290	1546	1661	900
131RC	F	Cre-	269	108	4680	Dark	43753	4001.02	21.163	20.808	0.355	5.4	3415.87	0.045	0.5	0.455	7.4	0.85375	0.5	0.5	654	251	502	152
131RC	F	Cre-	16	108	126	Dark	43749.9	3949.12	21.163	20.872	0.291	0.3	3240.38	0.043	0.358	0.315	0.4	0.820532	0.4	0.5	1649	892	1207	521
131RC	F	Cre-	226	108	3906	Light	43752.5	3940.77	21.163	20.971	0.192	4.6	2984.68	0.041	0.296	0.255	6.2	0.757384	0.3	0.5	437	76	353	93
131RC	F	Cre-	162	108	2754	Light	43751.7	3927.28	21.163	20.922	0.242	3.2	3270.81	0.04	0.364	0.324	4.3	0.832844	0.4	0.5	256	57	407	75
131RC	F	Cre-	102	108	1674	Dark	43751	3926.6	21.163	20.829	0.334	2.1	3104.64	0.043	0.39	0.347	2.7	0.790669	0.5	0.5	3692	2851	2635	1575
131RC	F	Cre-	210	108	3618	Light	43752.3	3914.23	21.163	20.884	0.279	4.3	3008.57	0.047	0.386	0.339	5.7	0.768623	0.4	0.5	1527	851	1092	471
131RC	F	Cre-	67	108	1044	Light	43750.5	3909.81	21.163	20.909	0.255	1.4	2973.4	0.041	0.357	0.316	1.8	0.760498	0.4	0.5	1280	677	930	453
131RC	F	Cre-	270	108	4698	Dark	43753.1	3893.6	21.163	20.783	0.379	5.4	3277.38	0.046	0.519	0.473	7.4	0.841736	0.6	0.5	4647	3635	3501	2307
131RC	F	Cre-	263	108	4572	Dark	43753	3888.36	21.163	20.829	0.333	5.3	3368.59	0.045	0.479	0.434	7.2	0.866327	0.5	0.5	1506	1016	1247	591
131RC	F	Cre-	83	108	1332	Light	43750.7	3886.76	21.163	21	0.163	1.7	3151.54	0.039	0.273	0.234	2.2	0.810841	0.3	0.5	20	1	20	5
131RC	F	Cre-	264	108	4590	Dark	43753	3883.35	21.163	20.831	0.332	5.3	3207.18	0.044	0.465	0.421	7.2	0.82588	0.5	0.5	3179	2286	2527	1491
131RC	F	Cre-	239	108	4140	Light	43752.7	3870.16	21.163	20.983	0.181	4.8	3246.42	0.04	0.292	0.252	6.5	0.838833	0.3	0.5	43	11	27	2
131RC	F	Cre-	188	108	3222	Dark	43752	3866.73	21.163	20.877	0.286	3.8	3182.38	0.042	0.407	0.365	5.1	0.823016	0.4	0.5	1343	746	1192	525
131RC	F	Cre-	123	108	2052	Dark	43751.2	3859.3	21.163	20.865	0.298	2.5	3329.78	0.042	0.363	0.321	3.3	0.862795	0.5	0.5	2251	1454	1897	943
131RC	F	Cre-	193	108	3312	Dark	43752.1	3852.88	21.163	20.85	0.312	3.9	3205.6	0.045	0.413	0.368	5.2	0.832002	0.5	0.5	2056	1286	1623	866
131RC	F	Cre-	257	108	4464	Dark	43752.9	3846.89	21.163	20.971	0.192	5.1	3305.46	0.043	0.299	0.256	7	0.859254	0.3	0.5	13	5	34	8
131RC	F	Cre-	132	108	2214	Light	43751.3	3839.62	21.163	20.877	0.286	2.7	2915.88	0.042	0.366	0.324	3.5	0.759417	0.4	0.5	2346	1475	1498	731
131RC	F	Cre-	275	108	4788	Dark	43753.1	3835.37	21.163	20.831	0.332	5.6	3284.63	0.047	0.445	0.398	7.6	0.856407	0.5	0.5	2201	1482	1969	1034
131RC	F	Cre-	89	108	1440	Dark	43750.8	3834.32	21.163	20.991	0.173	1.8	2858.75	0.041	0.296	0.255	2.3	0.74557	0.3	0.5	373	81	341	56
131RC	F	Cre-	240	108	4158	Light	43752.7	3828.47	21.163	20.9	0.264	4.8	3317	0.04	0.404	0.365	6.5	0.866404	0.4	0.5	1124	672	1049	431
131RC	F	Cre-	278	108	4842	Dark	43753.2	3814.6	21.163	20.858	0.304	5.7	2921.91	0.047	0.384	0.337	7.7	0.765982	0.5	0.5	2020	1287	1701	828
131RC	F	Cre-	14	108	90	Dark	43749.9	3814.41	21.163	20.863	0.301	0.3	2982.15	0.041	0.413	0.372	0.4	0.78181	0.5	0.5	2003	1166	1472	609
131RC	F	Cre-	11	108	36	Dark	43749.8	3800.9	21.163	20.969	0.194	0.2	2957.57	0.04	0.291	0.251	0.3	0.778125	0.3	0.5	1166	508	811	350
131RC	F	Cre-	72	108	1134	Light	43750.6	3796.37	21.163	20.916	0.248	1.5	3229.13	0.04	0.331	0.291	1.9	0.850584	0.4	0.5	449	282	384	191
131RC	F	Cre-	59	108	900	Light	43750.4	3786.28	21.163	20.986	0.177	1.3	2941.88	0.043	0.281	0.238	1.6	0.776984	0.3	0.5	87	61	63	42
131RC	F	Cre-	25	108	288	Dark	43750	3757.59	21.162	20.831	0.331	0.5	2866.75	0.045	0.43	0.385	0.7	0.762921	0.5	0.5	1635	777	1251	527
131RC	F	Cre-	203	108	3492	Dark	43752.2	3753.15	21.163	20.884	0.279	4.1	3181.36	0.045	0.388	0.343	5.5	0.847651	0.4	0.5	193	56	107	34
131RC	F	Cre-	5	108	NA	NA	43749.7	3743.12	21.163	20.959	0.204	0.1	3056.49	0.039	0.279	0.241	0.1	0.816563	0.3	0.5	1025	560	797	312
131RC	F	Cre-	185	108	3168	Dark	43752	3743.02	21.163	20.827	0.336	3.7	3043.93	0.042	0.471	0.429	5	0.81323	0.5	0.5	2998	2145	2479	1387
131RC	F	Cre-	87	108	1404	Light	43750.8	3731.37	21.163	20.998	0.165	1.8	3248.79	0.04	0.274	0.234	2.3	0.87067	0.3	0.5	34	7	12	3
131RC	F	Cre-	50	108	738	Light	43750.3	3721.59	21.163	20.984	0.178	1.1	2860.3	0.045	0.285	0.24	1.4	0.76857	0.3	0.5	1	0	105	33
131RC	F	Cre-	218	108	3762	Light	43752.4	3715.78	21.163	20.932	0.231	4.4	3254.14	0.047	0.358	0.312	5.9	0.875764	0.4	0.5	941	437	756	240
131RC	F	Cre-	155	108	2628	Light	43751.6	3714.46	21.163	20.89	0.273	3.1	3128.29	0.041	0.41	0.37	4.1	0.842192	0.4	0.5	1342	793	1160	482
131RC	F	Cre-	250	108	4338	Dark	43752.8	3710.85	21.163	20.965	0.198	5	2845.29	0.041	0.321	0.28	6.8	0.76675	0.3	0.5	51	20	53	16
131RC	F	Cre-	169	108	2880	Dark	43751.8	3701.98	21.163	20.985	0.178	3.4	3020.93	0.04	0.281	0.241	4.5	0.816031	0.3	0.5	16	3	35	4
131RC	F	Cre-	222	108	3834	Light	43752.5	3699.01	21.163	20.951	0.212	4.5	3046.79	0.047	0.328	0.281	6	0.823675	0.3	0.5	85	31	162	47
131RC	F	Cre-	27	108	324	Dark	43750	3698.5	21.163	20.851	0.312	0.6	2964.52	0.045	0.377	0.332	0.7	0.801546	0.5	0.5	1931	1212	1507	739
131RC	F	Cre-	126	108	2106	Dark	43751.3	3697.14	21.163	20.939	0.224	2.6	3195.77	0.041	0.322	0.281	3.3	0.864389	0.3	0.5	1158	453	1102	359
131RC	F	Cre-	35	108	468	Dark	43750.1	3689.98	21.163	20.847	0.315	0.8	2871.52	0.045	0.369	0.324	1	0.778193	0.5	0.5	2444	1659	1743	918
131RC	F	Cre-	30	108	378	Dark	43750.1	3687.83	21.163	20.867	0.296	0.7	2861.37	0.046	0.357	0.311	0.8	0.775894	0.4	0.5	1912	1166	1694	791
131RC	F	Cre-	2	108	NA	NA	43749.7	3681.1	21.163	20.887	0.276	0	3020.27	0.039	0.362	0.323	0	0.820482	0.4	0.5	1618	926	1242	533
131RC	F	Cre-	119	108	1980	Dark	43751.2	3670.19	21.163	20.914	0.249	2.4	2881.12	0.042	0.343	0.301	3.2	0.785005	0.4	0.5	344	97	253	81
131RC	F	Cre-	94	108	1530	Dark	43750.9	3668.24	21.163	20.999	0.164	1.9	3241.16	0.041	0.285	0.244	2.5	0.883573	0.3	0.5	23	7	50	20
131RC	F	Cre-	233	108	4032	Light	43752.6	3658.62	21.163	21.001	0.162	4.7	2883.17	0.04	0.268	0.228	6.3	0.788049	0.2	0.5	21	0	2	2
131RC	F	Cre-	297	108	5184	Light	43753.4	3650.13	21.162	20.963	0.2	6.1	2835.53	0.05	0.313	0.262	8.2	0.776831	0.3	0.5	74	22	51	14
131RC	F	Cre-	235	108	4068	Light	43752.6	3645.32	21.163	20.861	0.302	4.8	3139.68	0.04	0.432	0.392	6.4	0.86129	0.5	0.5	2279	1497	1697	930
131RC	F	Cre-	63	108	972	Light	43750.5	3645.04	21.163	20.995	0.168	1.4	2874.98	0.042	0.288	0.247	1.7	0.788737	0.3	0.5	72	48	98	29
131RC	F	Cre-	189	108	3240	Dark	43752	3641.01	21.163	20.837	0.326	3.8	2794.33	0.044	0.416	0.373	5.1	0.767461	0.5	0.5	2509	1738	2202	1273
131RC	F	Cre-	38	108	522	Dark	43750.2	3638.81	21.163	20.829	0.334	0.9	2738.28	0.046	0.423	0.377	1.1	0.75252	0.5	0.5	2218	1541	1384	760
131RC	F	Cre-	19	108	180	Dark	43749.9	3636.81	21.163	20.852	0.311	0.4	2990.29	0.044	0.381	0.337	0.5	0.82223	0.5	0.5	1131	557	1015	353
131RC	F	Cre-	143	108	2412	Light	43751.5	3629.52	21.163	21	0.163	2.9	2743.54	0.041	0.295	0.254	3.8	0.755896	0.3	0.5	10	3	16	3
131RC	F	Cre-	206	108	3546	Dark	43752.3	3628.15	21.163	20.97	0.193	4.2	2862.22	0.043	0.317	0.273	5.6	0.788892	0.3	0.5	39	8	80	18
131RC	F	Cre-	146	108	2466	Light	43751.5	3627.25	21.163	21.005	0.158	3	3170.25	0.04	0.282	0.242	3.9	0.87401	0.2	0.5	59	26	51	27
131RC	F	Cre-	129	108	2160	Light	43751.3	3616.42	21.163	20.953	0.21	2.6	2736.91	0.041	0.299	0.258	3.4	0.756799	0.3	0.5	242	88	225	77
131RC	F	Cre-	225	108	3888	Light	43752.5	3606.57	21.163	20.893	0.271	4.6	2851.01	0.042	0.391	0.35	6.1	0.790502	0.4	0.5	1940	1065	1370	698
131RC	F	Cre-	238	108	4122	Light	43752.7	3594.38	21.163	20.989	0.174	4.8	2983.88	0.04	0.294	0.253	6.5	0.830153	0.3	0.5	53	17	24	6
131RC	F	Cre-	243	108	4212	Light	43752.7	3591.76	21.163	20.988	0.176	4.9	2849.91	0.041	0.319	0.278	6.6	0.793458	0.3	0.5	180	97	168	70
131RC	F	Cre-	244	108	4230	Light	43752.7	3587.49	21.163	20.956	0.207	4.9	2832.59	0.04	0.346	0.306	6.6	0.789573	0.3	0.5	82	12	58	23
131RC	F	Cre-	214	108	3690	Light	43752.4	3582.4	21.163	20.968	0.195	4.4	3141.31	0.048	0.329	0.281	5.8	0.876874	0.3	0.5	245	56	185	47
131RC	F	Cre-	90	108	1458	Dark	43750.8	3578.79	21.163	20.997	0.166	1.8	3078.4	0.041	0.281	0.24	2.4	0.860178	0.3	0.5	37	6	26	9
131RC	F	Cre-	219	108	3780	Light	43752.4	3578.72	21.162	20.92	0.242	4.5	2668	0.049	0.36	0.312	6	0.745519	0.4	0.5	1459	1031	1157	590
131RC	F	Cre-	116	108	1926	Dark	43751.1	3576.76	21.163	21.017	0.146	2.4	2671.98	0.042	0.237	0.196	3.1	0.747039	0.2	0.5	430	85	402	87
131RC	F	Cre-	140	108	2358	Light	43751.4	3576.34	21.163	20.88	0.283	2.9	2772.41	0.041	0.408	0.367	3.7	0.77521	0.4	0.5	1163	814	870	427
131RC	F	Cre-	247	108	4284	Light	43752.8	3571.64	21.163	20.882	0.281	5	2911.5	0.041	0.426	0.385	6.7	0.815172	0.4	0.5	603	165	355	82
131RC	F	Cre-	41	108	576	Dark	43750.2	3568.02	21.163	20.901	0.262	1	2845.79	0.046	0.362	0.316	1.1	0.797582	0.4	0.5	1308	786	1077	515
131RC	F	Cre-	144	108	2430	Light	43751.5	3564.33	21.163	20.99	0.173	2.9	2954.91	0.041	0.308	0.267	3.8	0.829023	0.3	0.5	693	369	514	216
131RC	F	Cre-	177	108	3024	Dark	43751.9	3563.71	21.163	20.854	0.309	3.5	2793.7	0.042	0.436	0.394	4.7	0.78393	0.5	0.5	1464	967	1052	544
131RC	F	Cre-	217	108	3744	Light	43752.4	3562.87	21.163	20.825	0.337	4.4	2779.31	0.047	0.458	0.41	5.9	0.780076	0.5	0.5	1099	665	713	354
131RC	F	Cre-	82	108	1314	Light	43750.7	3554.25	21.163	20.991	0.173	1.7	2662.29	0.039	0.29	0.251	2.2	0.749044	0.3	0.5	20	3	36	10
131RC	F	Cre-	254	108	4410	Dark	43752.9	3537.99	21.163	20.936	0.227	5.1	3085.14	0.042	0.335	0.293	6.9	0.872005	0.3	0.5	147	25	251	53
131RC	F	Cre-	49	108	720	Light	43750.3	3535.04	21.163	20.97	0.193	1.1	2756.44	0.045	0.297	0.252	1.4	0.779746	0.3	0.5	112	61	66	24
131RC	F	Cre-	43	108	612	Dark	43750.2	3533.43	21.163	20.921	0.242	1	2843.48	0.047	0.349	0.302	1.2	0.804736	0.4	0.5	389	184	330	116
131RC	F	Cre-	78	108	1242	Light	43750.7	3533.17	21.163	20.986	0.177	1.6	2801.11	0.039	0.284	0.245	2.1	0.792805	0.3	0.5	108	11	104	14
131RC	F	Cre-	62	108	954	Light	43750.5	3526.22	21.163	20.99	0.173	1.3	2901.34	0.042	0.289	0.247	1.7	0.82279	0.3	0.5	392	174	343	137
131RC	F	Cre-	86	108	1386	Light	43750.8	3524.64	21.163	21.007	0.157	1.8	2822.35	0.04	0.271	0.23	2.3	0.800747	0.2	0.5	146	53	93	22
131RC	F	Cre-	32	108	414	Dark	43750.1	3524.64	21.163	20.847	0.316	0.7	2811.47	0.045	0.392	0.347	0.9	0.797663	0.5	0.5	2383	1617	1833	987
131RC	F	Cre-	149	108	2520	Light	43751.5	3522.85	21.163	20.99	0.174	3	2731.25	0.041	0.314	0.273	3.9	0.775294	0.3	0.5	66	33	50	15
131RC	F	Cre-	246	108	4266	Light	43752.8	3520.06	21.163	20.981	0.183	4.9	2845.25	0.041	0.313	0.272	6.7	0.808297	0.3	0.5	12	0	20	8
131RC	F	Cre-	4	108	NA	NA	43749.7	3518.3	21.163	20.92	0.243	0.1	3009.67	0.039	0.334	0.295	0.1	0.855433	0.4	0.5	1134	465	882	377
131RC	F	Cre-	158	108	2682	Light	43751.7	3505.5	21.163	20.99	0.173	3.2	2968.77	0.04	0.297	0.256	4.2	0.846889	0.3	0.5	19	0	8	1
131RC	F	Cre-	21	108	216	Dark	43749.9	3498.33	21.163	20.87	0.293	0.5	3031.57	0.043	0.412	0.368	0.6	0.866576	0.4	0.5	1008	468	868	325
131RC	F	Cre-	57	108	864	Light	43750.4	3493.41	21.163	20.987	0.175	1.3	2692.34	0.044	0.275	0.231	1.6	0.770691	0.3	0.5	147	12	75	13
131RC	F	Cre-	120	108	1998	Dark	43751.2	3493.37	21.163	21.026	0.138	2.5	2832.24	0.042	0.237	0.196	3.2	0.810748	0.2	0.5	89	20	114	42
131RC	F	Cre-	110	108	1818	Dark	43751.1	3491.7	21.163	20.995	0.168	2.3	2679.57	0.042	0.251	0.209	2.9	0.76741	0.3	0.5	320	190	208	106
131RC	F	Cre-	216	108	3726	Light	43752.4	3481.34	21.163	20.989	0.174	4.4	2842.38	0.048	0.316	0.268	5.9	0.816462	0.3	0.5	29	8	12	7
131RC	F	Cre-	36	108	486	Dark	43750.1	3479.82	21.163	20.911	0.251	0.8	2823.68	0.045	0.314	0.269	1	0.811446	0.4	0.5	2041	1400	1452	767
131RC	F	Cre-	12	108	54	Dark	43749.8	3471.12	21.163	20.864	0.3	0.2	2680.58	0.04	0.413	0.373	0.3	0.772252	0.5	0.5	2035	1263	1300	567
131RC	F	Cre-	23	108	252	Dark	43750	3467.24	21.163	20.966	0.197	0.5	2792.55	0.044	0.314	0.27	0.6	0.805412	0.3	0.5	70	24	89	22
131RC	F	Cre-	299	108	5220	Light	43753.4	3451.97	21.163	20.841	0.322	6.2	2829.38	0.047	0.449	0.402	8.3	0.819641	0.5	0.5	2292	1457	1782	948
131RC	F	Cre-	111	108	1836	Dark	43751.1	3451.64	21.163	20.888	0.275	2.3	2738.16	0.042	0.385	0.344	2.9	0.793293	0.4	0.5	607	336	679	250
131RC	F	Cre-	46	108	666	Dark	43750.3	3448.31	21.163	20.969	0.194	1.1	2837.4	0.046	0.296	0.25	1.3	0.822838	0.3	0.5	469	207	458	146
131RC	F	Cre-	91	108	1476	Dark	43750.8	3444.75	21.163	21.012	0.151	1.8	2996.47	0.041	0.261	0.221	2.4	0.869865	0.2	0.5	43	19	24	11
131RC	F	Cre-	98	108	1602	Dark	43750.9	3442.9	21.163	20.929	0.234	2	2596.78	0.042	0.334	0.292	2.6	0.754242	0.4	0.5	1583	928	1350	602
131RC	F	Cre-	255	108	4428	Dark	43752.9	3438.39	21.163	20.965	0.198	5.1	2595.75	0.042	0.313	0.272	7	0.754932	0.3	0.5	24	9	28	6
131RC	F	Cre-	128	108	2142	Dark	43751.3	3437.44	21.163	21.031	0.132	2.6	2876.96	0.041	0.228	0.187	3.4	0.836949	0.2	0.5	36	11	55	34
131RC	F	Cre-	47	108	684	Dark	43750.3	3435.2	21.163	20.991	0.171	1.1	2610.82	0.045	0.289	0.244	1.3	0.760021	0.3	0.5	157	76	105	40
131RC	F	Cre-	268	108	4662	Dark	43753	3430.57	21.163	20.947	0.216	5.4	2686.68	0.046	0.34	0.294	7.3	0.783158	0.3	0.5	150	26	87	31
131RC	F	Cre-	34	108	450	Dark	43750.1	3429.22	21.163	20.911	0.252	0.8	2553.97	0.046	0.317	0.271	0.9	0.744767	0.4	0.5	1549	995	1107	580
131RC	F	Cre-	221	108	3816	Light	43752.4	3423.8	21.163	20.96	0.203	4.5	2565.7	0.046	0.315	0.27	6	0.749372	0.3	0.5	110	26	100	35
131RC	F	Cre-	10	108	18	Dark	43749.8	3422.82	21.163	20.884	0.279	0.2	3030.61	0.039	0.351	0.311	0.2	0.885411	0.4	0.5	940	589	690	298
131RC	F	Cre-	179	108	3060	Dark	43751.9	3422.28	21.163	20.833	0.33	3.6	2878.77	0.042	0.449	0.407	4.8	0.841186	0.5	0.5	1929	1189	1743	888
131RC	F	Cre-	52	108	774	Light	43750.3	3419.13	21.163	20.852	0.31	1.2	2694.75	0.045	0.426	0.38	1.4	0.788141	0.5	0.5	1320	884	1152	539
131RC	F	Cre-	197	108	3384	Dark	43752.1	3416.37	21.163	20.925	0.238	4	2890.57	0.045	0.363	0.318	5.3	0.846094	0.4	0.5	78	22	51	14
131RC	F	Cre-	121	108	2016	Dark	43751.2	3415.66	21.163	20.867	0.296	2.5	2946.99	0.041	0.37	0.329	3.2	0.862785	0.5	0.5	1092	763	780	379
131RC	F	Cre-	135	108	2268	Light	43751.4	3414.65	21.163	20.868	0.295	2.8	2609.44	0.046	0.362	0.316	3.6	0.764189	0.4	0.5	3357	2491	2451	1439
131RC	F	Cre-	103	108	1692	Dark	43751	3413.32	21.163	20.85	0.312	2.1	2637.64	0.044	0.371	0.327	2.7	0.772749	0.5	0.5	2879	2040	2209	1285
131RC	F	Cre-	228	108	3942	Light	43752.5	3409.67	21.163	20.979	0.184	4.6	2852.88	0.04	0.313	0.272	6.2	0.836704	0.3	0.5	217	57	224	55
131RC	F	Cre-	131	108	2196	Light	43751.3	3405.1	21.163	20.855	0.308	2.7	2825.96	0.041	0.413	0.372	3.5	0.82992	0.5	0.5	1979	1223	1676	784
131RC	F	Cre-	107	108	1764	Dark	43751	3398.18	21.163	20.859	0.304	2.2	2768.09	0.043	0.372	0.328	2.9	0.81458	0.5	0.5	1887	1300	1491	832
131RC	F	Cre-	266	108	4626	Dark	43753	3398.14	21.163	20.952	0.21	5.3	3106.08	0.045	0.334	0.288	7.3	0.914053	0.3	0.5	1071	450	706	256
131RC	F	Cre-	227	108	3924	Light	43752.5	3394.75	21.163	20.97	0.193	4.6	2941.06	0.041	0.292	0.251	6.2	0.866355	0.3	0.5	46	17	24	7
131RC	F	Cre-	65	108	1008	Light	43750.5	3391.38	21.163	21.011	0.152	1.4	2634.72	0.041	0.261	0.22	1.7	0.776886	0.2	0.5	4	0	31	6
131RC	F	Cre-	165	108	2808	Light	43751.7	3358.62	21.163	20.86	0.303	3.3	2848.78	0.041	0.435	0.394	4.4	0.848201	0.5	0.5	2481	1596	1811	998
131RC	F	Cre-	175	108	2988	Dark	43751.9	3357.93	21.163	21.003	0.16	3.5	2678.63	0.042	0.28	0.238	4.6	0.797705	0.2	0.5	183	49	207	21
131RC	F	Cre-	127	108	2124	Dark	43751.3	3353.41	21.163	20.996	0.168	2.6	2680.48	0.041	0.255	0.214	3.4	0.799331	0.3	0.5	344	122	166	60
131RC	F	Cre-	242	108	4194	Light	43752.7	3352.36	21.163	20.973	0.19	4.9	2964.33	0.041	0.306	0.265	6.6	0.884251	0.3	0.5	35	5	28	15
131RC	F	Cre-	60	108	918	Light	43750.4	3349.62	21.163	21.005	0.158	1.3	2819.86	0.042	0.263	0.221	1.6	0.841843	0.2	0.5	40	14	35	10
131RC	F	Cre-	53	108	792	Light	43750.3	3348.87	21.163	20.905	0.258	1.2	2659.22	0.045	0.374	0.328	1.5	0.794065	0.4	0.5	1315	675	939	425
131RC	F	Cre-	152	108	2574	Light	43751.6	3348.51	21.163	21.018	0.146	3.1	2495.84	0.041	0.267	0.227	4	0.745359	0.2	0.5	35	13	40	17
131RC	F	Cre-	259	108	4500	Dark	43752.9	3348.32	21.163	20.882	0.281	5.2	3009.64	0.044	0.405	0.361	7.1	0.898849	0.4	0.5	1191	521	965	380
131RC	F	Cre-	253	108	4392	Dark	43752.8	3338.46	21.163	20.87	0.293	5.1	2671.3	0.042	0.426	0.383	6.9	0.80016	0.5	0.5	1347	651	1513	704
131RC	F	Cre-	13	108	72	Dark	43749.8	3336.32	21.163	20.854	0.309	0.3	2779.22	0.041	0.413	0.372	0.3	0.833019	0.5	0.5	2176	1462	1718	868
131RC	F	Cre-	69	108	1080	Light	43750.5	3333.89	21.163	20.932	0.232	1.5	2822.94	0.04	0.32	0.28	1.8	0.846739	0.4	0.5	179	76	237	61
131RC	F	Cre-	164	108	2790	Light	43751.7	3333.38	21.163	20.838	0.325	3.3	2632.05	0.04	0.451	0.41	4.3	0.789605	0.5	0.5	1084	744	740	402
131RC	F	Cre-	37	108	504	Dark	43750.1	3332.73	21.163	20.861	0.301	0.9	2960.39	0.046	0.36	0.314	1	0.888278	0.5	0.5	2730	1880	1923	964
131RC	F	Cre-	276	108	4806	Dark	43753.1	3331.97	21.163	20.81	0.353	5.6	2857.95	0.046	0.463	0.417	7.7	0.857733	0.5	0.5	3330	2471	2656	1601
131RC	F	Cre-	224	108	3870	Light	43752.5	3327.51	21.163	20.846	0.317	4.6	2783.65	0.045	0.46	0.415	6.1	0.836558	0.5	0.5	720	287	492	172
131RC	F	Cre-	248	108	4302	Light	43752.8	3323.18	21.163	20.879	0.284	5	2714.71	0.042	0.42	0.378	6.8	0.816904	0.4	0.5	1594	996	1475	678
131RC	F	Cre-	76	108	1206	Light	43750.6	3310.96	21.163	20.886	0.277	1.6	2920.8	0.039	0.392	0.353	2	0.882164	0.4	0.5	1155	645	1088	479
131RC	F	Cre-	178	108	3042	Dark	43751.9	3310.45	21.163	20.812	0.351	3.5	2927.53	0.042	0.445	0.403	4.7	0.88433	0.5	0.5	2944	2107	2451	1445
131RC	F	Cre-	181	108	3096	Dark	43751.9	3306.57	21.163	20.914	0.249	3.6	2826.23	0.042	0.362	0.32	4.8	0.854732	0.4	0.5	1863	1110	1626	794
131RC	F	Cre-	74	108	1170	Light	43750.6	3304.54	21.163	20.994	0.17	1.6	2748	0.04	0.254	0.214	2	0.831582	0.3	0.5	61	12	21	8
131RC	F	Cre-	198	108	3402	Dark	43752.2	3303	21.163	20.83	0.332	4	2834.49	0.045	0.444	0.399	5.4	0.858157	0.5	0.5	1834	1149	1625	779
131RC	F	Cre-	137	108	2304	Light	43751.4	3302.58	21.163	20.936	0.227	2.8	2914.76	0.041	0.332	0.291	3.6	0.882571	0.3	0.5	1300	726	1173	529
131RC	F	Cre-	109	108	1800	Dark	43751	3302.5	21.163	20.938	0.225	2.2	2828	0.042	0.304	0.262	2.9	0.856321	0.3	0.5	1291	642	1347	458
131RC	F	Cre-	192	108	3294	Dark	43752.1	3299.45	21.163	20.857	0.306	3.9	2889.98	0.044	0.402	0.358	5.2	0.875898	0.5	0.5	1650	884	1388	675
131RC	F	Cre-	154	108	2610	Light	43751.6	3295.24	21.163	20.846	0.318	3.1	3206.88	0.041	0.447	0.406	4.1	0.973186	0.5	0.5	2426	1671	1909	978
131RC	F	Cre-	29	108	360	Dark	43750	3293.15	21.163	20.841	0.322	0.7	2700.33	0.045	0.369	0.324	0.8	0.819982	0.5	0.5	2556	1733	1960	1113
131RC	F	Cre-	145	108	2448	Light	43751.5	3290.04	21.163	21.015	0.148	3	2780.78	0.041	0.281	0.24	3.8	0.845214	0.2	0.5	645	421	530	272
131RC	F	Cre-	220	108	3798	Light	43752.4	3276.93	21.163	20.928	0.234	4.5	3036.41	0.046	0.338	0.292	6	0.926602	0.4	0.5	301	132	297	99
131RC	F	Cre-	75	108	1188	Light	43750.6	3275.47	21.163	20.969	0.195	1.6	2745.41	0.039	0.279	0.24	2	0.838173	0.3	0.5	113	27	64	29
131RC	F	Cre-	170	108	2898	Dark	43751.8	3274.85	21.163	20.972	0.191	3.4	2752.46	0.04	0.325	0.285	4.5	0.840486	0.3	0.5	803	529	640	341
131RC	F	Cre-	191	108	3276	Dark	43752.1	3274.18	21.163	20.848	0.315	3.9	2769.64	0.044	0.387	0.343	5.2	0.845903	0.5	0.5	2214	1359	1959	1089
131RC	F	Cre-	296	108	5166	Light	43753.4	3272.29	21.162	20.88	0.282	6.1	2981.52	0.051	0.416	0.366	8.2	0.911142	0.4	0.5	287	38	363	97
131RC	F	Cre-	95	108	1548	Dark	43750.9	3270.47	21.163	20.896	0.268	1.9	2443.44	0.041	0.397	0.356	2.5	0.74712	0.4	0.5	516	186	407	128
131RC	F	Cre-	45	108	648	Dark	43750.2	3267.59	21.163	20.933	0.229	1	2654.24	0.046	0.344	0.298	1.3	0.812294	0.4	0.5	338	126	332	100
131RC	F	Cre-	277	108	4824	Dark	43753.1	3267.58	21.163	20.821	0.342	5.6	2879.63	0.046	0.422	0.376	7.7	0.881273	0.5	0.5	3031	2112	2501	1389
131RC	F	Cre-	141	108	2376	Light	43751.4	3267.42	21.163	20.869	0.294	2.9	2820.19	0.041	0.409	0.368	3.7	0.863124	0.5	0.5	2248	1500	1719	857
131RC	F	Cre-	40	108	558	Dark	43750.2	3264.62	21.163	20.893	0.27	0.9	2702.18	0.045	0.357	0.312	1.1	0.827717	0.4	0.5	889	452	748	320
131RC	F	Cre-	171	108	2916	Dark	43751.8	3262.76	21.163	20.989	0.175	3.4	2839.68	0.04	0.315	0.274	4.5	0.870332	0.3	0.5	50	2	25	4
131RC	F	Cre-	1	108	NA	NA	43749.7	3256.15	21.163	20.884	0.278	0	2940.39	0.044	0.349	0.305	0	0.903027	0.4	0.5	1552	913	1191	584
131RC	F	Cre-	289	108	5040	Light	43753.3	3251.41	21.162	20.978	0.184	5.9	2821.58	0.048	0.273	0.225	8	0.867802	0.3	0.5	34	7	25	2
131RC	F	Cre-	231	108	3996	Light	43752.6	3244.98	21.163	20.981	0.182	4.7	2592.28	0.04	0.296	0.256	6.3	0.798857	0.3	0.5	53	7	14	1
131RC	F	Cre-	79	108	1260	Light	43750.7	3240.14	21.163	20.986	0.177	1.6	2786.33	0.039	0.274	0.235	2.1	0.859942	0.3	0.5	18	6	24	10
131RC	F	Cre-	117	108	1944	Dark	43751.1	3235.85	21.163	20.923	0.24	2.4	3106.2	0.041	0.348	0.306	3.1	0.959934	0.4	0.5	592	179	640	231
131RC	F	Cre-	291	108	5076	Light	43753.3	3229.97	21.162	20.891	0.271	6	3016.82	0.05	0.373	0.324	8.1	0.93401	0.4	0.5	2391	1650	1731	1057
131RC	F	Cre-	130	108	2178	Light	43751.3	3229.86	21.163	20.945	0.218	2.7	2652.29	0.041	0.298	0.257	3.4	0.821177	0.3	0.5	1945	1355	1402	739
131RC	F	Cre-	176	108	3006	Dark	43751.9	3224.84	21.163	20.997	0.166	3.5	2414.81	0.042	0.281	0.24	4.7	0.748816	0.3	0.5	74	34	59	19
131RC	F	Cre-	184	108	3150	Dark	43752	3224.44	21.163	20.945	0.218	3.7	2804.72	0.042	0.342	0.301	4.9	0.86983	0.3	0.5	679	242	779	240
131RC	F	Cre-	283	108	4932	Dark	43753.2	3220.95	21.163	20.968	0.194	5.8	2932.06	0.047	0.278	0.232	7.9	0.910311	0.3	0.5	748	338	638	249
131RC	F	Cre-	33	108	432	Dark	43750.1	3217.11	21.163	20.844	0.319	0.8	2645.27	0.046	0.384	0.338	0.9	0.822249	0.5	0.5	2034	1182	1572	788
131RC	F	Cre-	115	108	1908	Dark	43751.1	3213.08	21.163	20.89	0.273	2.4	2907.1	0.042	0.345	0.303	3.1	0.90477	0.4	0.5	1381	722	1443	618
131RC	F	Cre-	80	108	1278	Light	43750.7	3206.32	21.163	21.023	0.14	1.7	2489.47	0.039	0.242	0.203	2.1	0.776428	0.2	0.5	52	22	21	5
131RC	F	Cre-	92	108	1494	Dark	43750.8	3196.49	21.163	20.917	0.246	1.8	2756.72	0.041	0.376	0.335	2.4	0.862418	0.4	0.5	489	187	392	132
131RC	F	Cre-	232	108	4014	Light	43752.6	3196.21	21.163	20.988	0.175	4.7	2667.32	0.04	0.287	0.247	6.3	0.834527	0.3	0.5	149	46	224	70
131RC	F	Cre-	20	108	198	Dark	43749.9	3196.19	21.163	20.969	0.194	0.4	2728.09	0.044	0.303	0.259	0.5	0.853544	0.3	0.5	782	346	588	213
131RC	F	Cre-	73	108	1152	Light	43750.6	3192.87	21.163	20.991	0.172	1.5	2860.84	0.04	0.264	0.224	1.9	0.896009	0.3	0.5	94	61	97	39
131RC	F	Cre-	55	108	828	Light	43750.4	3191.36	21.162	20.926	0.237	1.2	2925.25	0.051	0.344	0.293	1.5	0.916614	0.4	0.5	824	397	636	197
131RC	F	Cre-	295	108	5148	Light	43753.4	3190.46	21.162	20.993	0.169	6.1	3065.6	0.05	0.296	0.246	8.2	0.960864	0.3	0.5	200	99	148	53
131RC	F	Cre-	9	108	0	Dark	43749.8	3188.93	21.163	20.911	0.252	0.2	2721.03	0.04	0.352	0.312	0.2	0.853275	0.4	0.5	1315	629	1077	370
131RC	F	Cre-	241	108	4176	Light	43752.7	3188.19	21.163	20.959	0.205	4.9	2871.62	0.04	0.321	0.281	6.6	0.900706	0.3	0.5	226	54	262	50
131RC	F	Cre-	81	108	1296	Light	43750.7	3185.44	21.163	20.881	0.282	1.7	2829.77	0.039	0.394	0.355	2.1	0.888346	0.4	0.5	475	253	344	140
131RC	F	Cre-	251	108	4356	Dark	43752.8	3185.07	21.163	20.964	0.199	5	3058.59	0.042	0.312	0.271	6.8	0.96029	0.3	0.5	35	14	39	10
131RC	F	Cre-	196	108	3366	Dark	43752.1	3183.95	21.163	20.956	0.207	4	2822.06	0.045	0.338	0.293	5.3	0.886339	0.3	0.5	397	185	365	127
131RC	F	Cre-	290	108	5058	Light	43753.3	3176.08	21.162	20.798	0.364	6	2890.36	0.049	0.474	0.425	8.1	0.910041	0.6	0.5	1907	1283	1535	844
131RC	F	Cre-	258	108	4482	Dark	43752.9	3175.61	21.163	20.837	0.325	5.2	3043.95	0.044	0.466	0.422	7	0.95854	0.5	0.5	1670	949	1380	673
131RC	F	Cre-	209	108	3600	Light	43752.3	3168.71	21.163	20.875	0.288	4.3	3136.29	0.046	0.392	0.346	5.7	0.989769	0.4	0.5	2180	1430	1690	890
131RC	F	Cre-	284	108	4950	Dark	43753.2	3166.79	21.163	20.931	0.232	5.8	2922.41	0.047	0.306	0.259	7.9	0.922831	0.4	0.5	136	20	162	24
131RC	F	Cre-	108	108	1782	Dark	43751	3164.8	21.163	20.927	0.236	2.2	2619.94	0.043	0.306	0.263	2.9	0.827837	0.4	0.5	1544	922	1245	623
131RC	F	Cre-	300	108	5238	Light	43753.4	3164.46	21.163	20.92	0.242	6.2	2887.73	0.047	0.362	0.315	8.3	0.912553	0.4	0.5	759	287	859	229
131RC	F	Cre-	213	108	3672	Light	43752.3	3163.58	21.163	20.97	0.193	4.4	2819.35	0.047	0.293	0.246	5.8	0.891192	0.3	0.5	25	4	2	0
131RC	F	Cre-	230	108	3978	Light	43752.6	3157.67	21.163	20.979	0.184	4.7	2705.5	0.04	0.305	0.265	6.3	0.856803	0.3	0.5	29	13	29	5
131RC	F	Cre-	134	108	2250	Light	43751.4	3152.3	21.163	20.845	0.318	2.8	2948.85	0.041	0.397	0.356	3.5	0.935461	0.5	0.5	2231	1595	1708	906
131RC	F	Cre-	64	108	990	Light	43750.5	3149.7	21.163	20.998	0.166	1.4	2494.02	0.041	0.278	0.237	1.7	0.791828	0.3	0.5	26	17	40	15
131RC	F	Cre-	61	108	936	Light	43750.4	3144.65	21.163	20.929	0.234	1.3	2964.1	0.042	0.34	0.297	1.7	0.942584	0.4	0.5	144	59	133	41
131RC	F	Cre-	279	108	4860	Dark	43753.2	3141.1	21.163	20.827	0.335	5.7	3054.56	0.047	0.404	0.357	7.8	0.972448	0.5	0.5	3226	2430	2534	1567
131RC	F	Cre-	236	108	4086	Light	43752.6	3134.66	21.163	20.904	0.26	4.8	2601.61	0.04	0.388	0.348	6.4	0.829951	0.4	0.5	815	311	919	321
131RC	F	Cre-	180	108	3078	Dark	43751.9	3134.59	21.163	20.826	0.337	3.6	2736.17	0.042	0.464	0.422	4.8	0.872896	0.5	0.5	2188	1521	1736	930
131RC	F	Cre-	113	108	1872	Dark	43751.1	3132.04	21.163	20.875	0.288	2.3	2926.99	0.042	0.372	0.329	3	0.934531	0.4	0.5	1709	905	1523	663
131RC	F	Cre-	237	108	4104	Light	43752.6	3131.09	21.163	20.936	0.227	4.8	3015.84	0.04	0.359	0.319	6.5	0.963191	0.4	0.5	196	35	250	63
131RC	F	Cre-	223	108	3852	Light	43752.5	3129.6	21.163	20.989	0.173	4.5	2822.26	0.045	0.314	0.269	6.1	0.901795	0.3	0.5	185	78	159	76
131RC	F	Cre-	201	108	3456	Dark	43752.2	3127.35	21.163	20.894	0.269	4.1	2621.06	0.045	0.369	0.324	5.5	0.83811	0.4	0.5	1342	513	1155	398
131RC	F	Cre-	28	108	342	Dark	43750	3126.07	21.163	20.877	0.286	0.6	2786.99	0.045	0.348	0.304	0.8	0.891532	0.4	0.5	1723	988	1525	656
131RC	F	Cre-	252	108	4374	Dark	43752.8	3125.23	21.163	20.836	0.327	5.1	2753.74	0.042	0.464	0.422	6.9	0.881134	0.5	0.5	2077	1403	1598	876
131RC	F	Cre-	58	108	882	Light	43750.4	3121.77	21.163	20.989	0.174	1.3	2796.22	0.044	0.282	0.238	1.6	0.895715	0.3	0.5	40	24	33	20
131RC	F	Cre-	167	108	2844	Light	43751.8	3119.06	21.163	20.885	0.279	3.3	2451.86	0.04	0.384	0.343	4.4	0.786088	0.4	0.5	2788	1949	2209	1242
131RC	F	Cre-	6	108	NA	NA	43749.8	3117.75	21.163	20.907	0.257	0.1	2783.26	0.038	0.352	0.314	0.1	0.892715	0.4	0.5	1462	929	1211	581
131RC	F	Cre-	8	108	NA	NA	43749.8	3116.04	21.163	20.92	0.244	0.2	2974.98	0.039	0.32	0.28	0.2	0.954731	0.4	0.5	1183	622	811	335
131RC	F	Cre-	272	108	4734	Dark	43753.1	3104.61	21.163	20.808	0.354	5.5	2633.11	0.045	0.483	0.438	7.5	0.848128	0.5	0.5	2495	1689	1954	1179
131RC	F	Cre-	199	108	3420	Dark	43752.2	3101.44	21.163	20.899	0.264	4.1	2704.73	0.045	0.372	0.326	5.4	0.872086	0.4	0.5	2155	1473	1793	997
131RC	F	Cre-	104	108	1710	Dark	43751	3098.43	21.163	20.874	0.289	2.1	2578.4	0.044	0.351	0.307	2.8	0.832164	0.4	0.5	1908	1165	1607	780
131RC	F	Cre-	122	108	2034	Dark	43751.2	3097.71	21.163	20.868	0.295	2.5	2744.49	0.042	0.364	0.322	3.2	0.885976	0.4	0.5	3009	2223	2126	1204
131RC	F	Cre-	187	108	3204	Dark	43752	3095.94	21.163	20.862	0.301	3.8	2426.34	0.044	0.395	0.352	5	0.783716	0.5	0.5	1891	1144	1900	900
131RC	F	Cre-	96	108	1566	Dark	43750.9	3095.94	21.163	20.831	0.332	1.9	2954.62	0.041	0.447	0.406	2.5	0.954355	0.5	0.5	2367	1502	2002	1000
131RC	F	Cre-	293	108	5112	Light	43753.3	3090.44	21.162	20.922	0.24	6	2750.62	0.051	0.324	0.273	8.1	0.890039	0.4	0.5	142	26	126	23
131RC	F	Cre-	56	108	846	Light	43750.4	3078.4	21.163	20.922	0.241	1.3	2602.19	0.045	0.351	0.306	1.5	0.845305	0.4	0.5	871	332	788	219
131RC	F	Cre-	287	108	5004	Dark	43753.3	3075.31	21.162	20.907	0.256	5.9	3115.33	0.048	0.36	0.311	8	1.01302	0.4	0.5	1380	744	1300	555
131RC	F	Cre-	112	108	1854	Dark	43751.1	3071.86	21.163	20.862	0.301	2.3	2863.67	0.042	0.387	0.345	3	0.932225	0.5	0.5	2702	1928	1892	1028
131RC	F	Cre-	48	108	702	Dark	43750.3	3071.76	21.163	20.907	0.256	1.1	2777.32	0.044	0.372	0.327	1.3	0.904147	0.4	0.5	129	20	213	40
131RC	F	Cre-	17	108	144	Dark	43749.9	3071.08	21.163	20.861	0.302	0.4	2656.64	0.043	0.359	0.315	0.5	0.86505	0.5	0.5	2404	1580	1527	755
131RC	F	Cre-	265	108	4608	Dark	43753	3068.7	21.163	20.923	0.24	5.3	2726.64	0.045	0.374	0.329	7.3	0.888532	0.4	0.5	792	344	817	251
131RC	F	Cre-	262	108	4554	Dark	43753	3066.58	21.163	20.958	0.205	5.3	2625.7	0.044	0.322	0.278	7.2	0.856231	0.3	0.5	36	12	42	10
131RC	F	Cre-	101	108	1656	Dark	43750.9	3066.35	21.163	20.857	0.306	2	2666.74	0.043	0.376	0.333	2.7	0.869679	0.5	0.5	2095	1260	1806	907
131RC	F	Cre-	273	108	4752	Dark	43753.1	3060.93	21.163	20.795	0.368	5.5	2899.88	0.045	0.494	0.449	7.5	0.947384	0.6	0.5	3451	2648	2570	1578
131RC	F	Cre-	31	108	396	Dark	43750.1	3060.84	21.163	20.845	0.318	0.7	2904.97	0.045	0.411	0.366	0.9	0.949075	0.5	0.5	1783	1241	1372	700
131RC	F	Cre-	118	108	1962	Dark	43751.2	3060.51	21.163	21.006	0.157	2.4	2951.36	0.042	0.263	0.222	3.1	0.964335	0.2	0.5	65	27	15	9
131RC	F	Cre-	24	108	270	Dark	43750	3054.79	21.163	20.992	0.171	0.5	3123.24	0.045	0.291	0.246	0.6	1.02241	0.3	0.5	136	81	88	34
131RC	F	Cre-	245	108	4248	Light	43752.7	3054.27	21.163	20.965	0.199	4.9	2670.89	0.041	0.331	0.29	6.7	0.874476	0.3	0.5	49	19	45	16
131RC	F	Cre-	183	108	3132	Dark	43752	3045.97	21.163	20.878	0.285	3.7	2460.64	0.042	0.39	0.348	4.9	0.807835	0.4	0.5	2076	1360	1631	891
131RC	F	Cre-	42	108	594	Dark	43750.2	3039.55	21.163	20.916	0.247	1	3002.6	0.046	0.36	0.314	1.2	0.987843	0.4	0.5	511	176	438	125
131RC	F	Cre-	71	108	1116	Light	43750.6	3039.19	21.163	20.918	0.245	1.5	2366.1	0.04	0.347	0.307	1.9	0.77853	0.4	0.5	809	394	765	337
131RC	F	Cre-	142	108	2394	Light	43751.5	3031.21	21.163	20.977	0.187	2.9	3015.72	0.041	0.309	0.268	3.8	0.99489	0.3	0.5	852	334	754	259
131RC	F	Cre-	195	108	3348	Dark	43752.1	3026.66	21.163	20.926	0.236	4	2636.31	0.045	0.326	0.281	5.3	0.871028	0.4	0.5	381	44	300	63
131RC	F	Cre-	168	108	2862	Light	43751.8	3025.71	21.163	20.908	0.255	3.4	2651.58	0.04	0.367	0.327	4.5	0.876347	0.4	0.5	598	136	861	197
131RC	F	Cre-	212	108	3654	Light	43752.3	3025.71	21.163	20.943	0.22	4.3	2634.45	0.048	0.307	0.259	5.8	0.870689	0.3	0.5	131	28	84	23
131RC	F	Cre-	298	108	5202	Light	43753.4	2998.22	21.162	20.934	0.229	6.1	2756.92	0.048	0.34	0.291	8.3	0.919519	0.4	0.5	134	31	116	31
131RC	F	Cre-	138	108	2322	Light	43751.4	2990.85	21.163	20.991	0.172	2.8	2601.48	0.041	0.271	0.23	3.7	0.869814	0.3	0.5	179	85	213	52
131RC	F	Cre-	261	108	4536	Dark	43752.9	2986.37	21.163	20.953	0.21	5.2	2788.8	0.045	0.34	0.295	7.1	0.933842	0.3	0.5	73	18	83	38
131RC	F	Cre-	207	108	3564	Dark	43752.3	2977.94	21.163	20.877	0.286	4.2	2765.48	0.043	0.408	0.365	5.6	0.928655	0.4	0.5	429	156	356	128
131RC	F	Cre-	68	108	1062	Light	43750.5	2976.49	21.163	21.002	0.162	1.4	2695.69	0.04	0.26	0.22	1.8	0.90566	0.2	0.5	539	91	268	70
131RC	F	Cre-	182	108	3114	Dark	43752	2965.56	21.163	20.854	0.309	3.6	2903.78	0.042	0.413	0.371	4.9	0.979166	0.5	0.5	2020	1310	1570	788
131RC	F	Cre-	85	108	1368	Light	43750.7	2950.72	21.163	20.915	0.248	1.7	2705.8	0.04	0.372	0.332	2.2	0.916996	0.4	0.5	836	427	753	295
131RC	F	Cre-	280	108	4878	Dark	43753.2	2947.76	21.163	20.859	0.304	5.7	2759.67	0.047	0.38	0.333	7.8	0.936193	0.5	0.5	2153	1225	1782	927
[truncated: 7,783 more rows]
[truncated: 1 more columns]

## Sheet: ITT_Raw_Value
From_Box	Mouse_index	Mark	Sex	Genotype	Mass (g)	Insulin (ul)	Time	Glucose_mgdl
79	1	LC	F	Cre-	22.9	68.7	0	120
79	1	LC	F	Cre-		0	15	75
79	1	LC	F	Cre-		0	30	74
79	1	LC	F	Cre-		0	45	75
79	1	LC	F	Cre-		0	60	69
79	1	LC	F	Cre-		0	90	103
79	2	RC	F	Cre+	24.9	74.7	0	184
79	2	RC	F	Cre+		0	15	158
79	2	RC	F	Cre+		0	30	108
79	2	RC	F	Cre+		0	45	145
79	2	RC	F	Cre+		0	60	130
79	2	RC	F	Cre+		0	90	122
79	3	BC	F	Cre-	22.8	68.4	0	160
79	3	BC	F	Cre-		0	15	79
79	3	BC	F	Cre-		0	30	81
79	3	BC	F	Cre-		0	45	73
79	3	BC	F	Cre-		0	60	63
79	3	BC	F	Cre-		0	90	73
80	4	LC	F	Cre-	24.7	74.1	0	126
80	4	LC	F	Cre-		0	15	85
80	4	LC	F	Cre-		0	30	68
80	4	LC	F	Cre-		0	45	87
80	4	LC	F	Cre-		0	60	80
80	4	LC	F	Cre-		0	90	100
80	5	RC	F	Cre+	25.6	76.8	0	117
80	5	RC	F	Cre+		0	15	108
80	5	RC	F	Cre+		0	30	99
80	5	RC	F	Cre+		0	45	146
80	5	RC	F	Cre+		0	60	138
80	5	RC	F	Cre+		0	90	136
81	6	BC+LP	M	Cre-	38.3	114.9	0	133
81	6	BC+LP	M	Cre-		0	15	89
81	6	BC+LP	M	Cre-		0	30	80
81	6	BC+LP	M	Cre-		0	45	87
81	6	BC+LP	M	Cre-		0	60	77
81	6	BC+LP	M	Cre-		0	90	89
81	7	LC	M	Cre+	36	108	0	141
81	7	LC	M	Cre+		0	15	159
81	7	LC	M	Cre+		0	30	103
81	7	LC	M	Cre+		0	45	97
81	7	LC	M	Cre+		0	60	126
81	7	LC	M	Cre+		0	90	134
81	8	RC	M	Cre+	38.1	114.3	0	225
81	8	RC	M	Cre+		0	15	162
81	8	RC	M	Cre+		0	30	109
81	8	RC	M	Cre+		0	45	100
81	8	RC	M	Cre+		0	60	105
81	8	RC	M	Cre+		0	90	104
81	9	BC	M	Cre+	38.6	115.8	0	141
81	9	BC	M	Cre+		0	15	100
81	9	BC	M	Cre+		0	30	111
81	9	BC	M	Cre+		0	45	96
81	9	BC	M	Cre+		0	60	105
81	9	BC	M	Cre+		0	90	107
82	10	LC	M	Cre+	36.2	108.6	0	139
82	10	LC	M	Cre+		0	15	125
82	10	LC	M	Cre+		0	30	140
82	10	LC	M	Cre+		0	45	107
82	10	LC	M	Cre+		0	60	120
82	10	LC	M	Cre+		0	90	114
82	11	RC	M	Cre+	33.1	99.3	0	157
82	11	RC	M	Cre+		0	15	`107
82	11	RC	M	Cre+		0	30	91
82	11	RC	M	Cre+		0	45	76
82	11	RC	M	Cre+		0	60	97
82	11	RC	M	Cre+		0	90	132
82	12	BC	M	Cre+	29.9	89.7	0	241
82	12	BC	M	Cre+		0	15	83
82	12	BC	M	Cre+		0	30	86
82	12	BC	M	Cre+		0	45	101
82	12	BC	M	Cre+		0	60	93
82	12	BC	M	Cre+		0	90	111
82	13	LP	M	Cre-	31.8	95.4	0	237
82	13	LP	M	Cre-		0	15	97
82	13	LP	M	Cre-		0	30	91
82	13	LP	M	Cre-		0	45	88
82	13	LP	M	Cre-		0	60	109
82	13	LP	M	Cre-		0	90	132
82	14	RP	M	Cre+	32.2	96.6	0	178
82	14	RP	M	Cre+		0	15	152
82	14	RP	M	Cre+		0	30	101
82	14	RP	M	Cre+		0	45	109
82	14	RP	M	Cre+		0	60	126
82	14	RP	M	Cre+		0	90	133
83	15	LC	F	Cre+		0	0	104
83	15	LC	F	Cre+		0	15	100
83	15	LC	F	Cre+		0	30	94
83	15	LC	F	Cre+		0	45	109
83	15	LC	F	Cre+		0	60	129
83	15	LC	F	Cre+		0	90	117
83	16	RC	F	Cre-	22.4	67.2	0	115
83	16	RC	F	Cre-		0	15	128
83	16	RC	F	Cre-		0	30	71
83	16	RC	F	Cre-		0	45	83
83	16	RC	F	Cre-		0	60	103
83	16	RC	F	Cre-		0	90	169
83	17	BC	F	Cre-	23.9	71.7	0	169
83	17	BC	F	Cre-		0	15	94
83	17	BC	F	Cre-		0	30	88
83	17	BC	F	Cre-		0	45	87
83	17	BC	F	Cre-		0	60	87
83	17	BC	F	Cre-		0	90	139
83	18	LP	F	Cre-	23.1	69.3	0	203
83	18	LP	F	Cre-		0	15	82
83	18	LP	F	Cre-		0	30	83
83	18	LP	F	Cre-		0	45	71
83	18	LP	F	Cre-		0	60	91
83	18	LP	F	Cre-		0	90	105
83	19	RP	F	Cre-	23.9	71.7	0	171
83	19	RP	F	Cre-		0	15	95
83	19	RP	F	Cre-		0	30	76
83	19	RP	F	Cre-		0	45	137
83	19	RP	F	Cre-		0	60	127
83	19	RP	F	Cre-		0	90	146
84	20	LC	M	Cre+	33.5	100.5	0	121
84	20	LC	M	Cre+		0	15	121
84	20	LC	M	Cre+		0	30	104
84	20	LC	M	Cre+		0	45	115
84	20	LC	M	Cre+		0	60	137
84	20	LC	M	Cre+		0	90	234
84	21	RC	M	Cre+	35.9	107.7	0	130
84	21	RC	M	Cre+		0	15	145
84	21	RC	M	Cre+		0	30	97
84	21	RC	M	Cre+		0	45	124
84	21	RC	M	Cre+		0	60	124
84	21	RC	M	Cre+		0	90	159
84	22	BC	M	Cre-	35.3	105.9	0	109
84	22	BC	M	Cre-		0	15	92
84	22	BC	M	Cre-		0	30	81
84	22	BC	M	Cre-		0	45	119
84	22	BC	M	Cre-		0	60	117
84	22	BC	M	Cre-		0	90	158
85	23	LC	F	Cre-	22.6	67.8	0	125
85	23	LC	F	Cre-		0	15	104
85	23	LC	F	Cre-		0	30	97
85	23	LC	F	Cre-		0	45	94
85	23	LC	F	Cre-		0	60	162
85	23	LC	F	Cre-		0	90	198
85	24	RC	F	Cre+	22.6	67.8	0	107
85	24	RC	F	Cre+		0	15	117
85	24	RC	F	Cre+		0	30	101
85	24	RC	F	Cre+		0	45	121
85	24	RC	F	Cre+		0	60	203
85	24	RC	F	Cre+		0	90	263
86	25	LC	M	Cre-		0	0	130
86	25	LC	M	Cre-		0	15	148
86	25	LC	M	Cre-		0	30	84
86	25	LC	M	Cre-		0	45	94
86	25	LC	M	Cre-		0	60	118
86	25	LC	M	Cre-		0	90	175
86	26	RC	M	Cre+	32.8	98.4	0	154
86	26	RC	M	Cre+		0	15	86
86	26	RC	M	Cre+		0	30	109
86	26	RC	M	Cre+		0	45	162
86	26	RC	M	Cre+		0	60	118
86	26	RC	M	Cre+		0	90	146
86	27	BC	M	Cre+	30.6	91.8	0	122
86	27	BC	M	Cre+		0	15	120
86	27	BC	M	Cre+		0	30	81
86	27	BC	M	Cre+		0	45	91
86	27	BC	M	Cre+		0	60	88
86	27	BC	M	Cre+		0	90	92
86	28	LP	M	Cre+	30.4	91.2	0	143
86	28	LP	M	Cre+		0	15	118
86	28	LP	M	Cre+		0	30	93
86	28	LP	M	Cre+		0	45	174
86	28	LP	M	Cre+		0	60	119
86	28	LP	M	Cre+		0	90	134
86	29	RP	M	Cre+	36.4	109.2	0	164
86	29	RP	M	Cre+		0	15	107
86	29	RP	M	Cre+		0	30	101
86	29	RP	M	Cre+		0	45	106
86	29	RP	M	Cre+		0	60	119
86	29	RP	M	Cre+		0	90	170
87	30	LC	F	Cre-	22.7	68.1	0	114
87	30	LC	F	Cre-		0	15	120
87	30	LC	F	Cre-		0	30	89
87	30	LC	F	Cre-		0	45	142
87	30	LC	F	Cre-		0	60	106
87	30	LC	F	Cre-		0	90	220
87	31	RC	F	Cre+	29.2	87.6	0	103
87	31	RC	F	Cre+		0	15	80
87	31	RC	F	Cre+		0	30	74
87	31	RC	F	Cre+		0	45	118
87	31	RC	F	Cre+		0	60	139
87	31	RC	F	Cre+		0	90	146
87	32	BC	F	Cre+	23.9	71.7	0	152
87	32	BC	F	Cre+		0	15	129
87	32	BC	F	Cre+		0	30	101
87	32	BC	F	Cre+		0	45	121
87	32	BC	F	Cre+		0	60	130
87	32	BC	F	Cre+		0	90	106
87	33	LP	F	Cre-	23.2	69.6	0	158
87	33	LP	F	Cre-		0	15	89
87	33	LP	F	Cre-		0	30	71
87	33	LP	F	Cre-		0	45	59
87	33	LP	F	Cre-		0	60	90
87	33	LP	F	Cre-		0	90	94
87	34	RP	F	Cre+	24.6	73.8	0	153
87	34	RP	F	Cre+		0	15	145
87	34	RP	F	Cre+		0	30	97
87	34	RP	F	Cre+		0	45	85
87	34	RP	F	Cre+		0	60	147
87	34	RP	F	Cre+		0	90	182
88	35	LC	M	Cre-	43.2	129.6	0	136
88	35	LC	M	Cre-		0	15	148
88	35	LC	M	Cre-		0	30	129
88	35	LC	M	Cre-		0	45	135
88	35	LC	M	Cre-		0	60	164
88	35	LC	M	Cre-		0	90	148
88	36	RC	M	Cre-	43	129	0	180
88	36	RC	M	Cre-		0	15	110
88	36	RC	M	Cre-		0	30	125
88	36	RC	M	Cre-		0	45	131
88	36	RC	M	Cre-		0	60	142
88	36	RC	M	Cre-		0	90	154
89	37	LC	F	Cre+	22.3	66.9	0	189
89	37	LC	F	Cre+		0	15	179
89	37	LC	F	Cre+		0	30	104
89	37	LC	F	Cre+		0	45	127
89	37	LC	F	Cre+		0	60	156
89	37	LC	F	Cre+		0	90	145
89	38	RC	F	Cre+	23.4	70.2	0	148
89	38	RC	F	Cre+		0	15	118
89	38	RC	F	Cre+		0	30	84
89	38	RC	F	Cre+		0	45	90
89	38	RC	F	Cre+		0	60	90
89	38	RC	F	Cre+		0	90	177
89	39	BC	F	Cre+	24.2	72.6	0	119
89	39	BC	F	Cre+		0	15	84
89	39	BC	F	Cre+		0	30	110
89	39	BC	F	Cre+		0	45	145
89	39	BC	F	Cre+		0	60	144
89	39	BC	F	Cre+		0	90	157
89	40	LP	F	Cre+	25	75	0	107
89	40	LP	F	Cre+		0	15	101
89	40	LP	F	Cre+		0	30	99
89	40	LP	F	Cre+		0	45	94
89	40	LP	F	Cre+		0	60	79
89	40	LP	F	Cre+		0	90	150
89	41	RP	F	Cre+	22.7	68.1	0	109
89	41	RP	F	Cre+		0	15	88
89	41	RP	F	Cre+		0	30	105
89	41	RP	F	Cre+		0	45	80
89	41	RP	F	Cre+		0	60	126
89	41	RP	F	Cre+		0	90	157
90	42	LC	F	Cre+	24.9	74.7	0	108
90	42	LC	F	Cre+		0	15	81
90	42	LC	F	Cre+		0	30	101
90	42	LC	F	Cre+		0	45	129
90	42	LC	F	Cre+		0	60	141
90	42	LC	F	Cre+		0	90	108
90	43	RC	F	Cre+	21.6	64.8	0	141
90	43	RC	F	Cre+		0	15	85
90	43	RC	F	Cre+		0	30	67
90	43	RC	F	Cre+		0	45	86
90	43	RC	F	Cre+		0	60	90
90	43	RC	F	Cre+		0	90	133
90	44	BC	F	Cre-	24.3	72.9	0	145
90	44	BC	F	Cre-		0	15	79
90	44	BC	F	Cre-		0	30	80
90	44	BC	F	Cre-		0	45	78
90	44	BC	F	Cre-		0	60	72
90	44	BC	F	Cre-		0	90	116
90	45	LP	F	Cre+	22.3	66.9	0	120
90	45	LP	F	Cre+		0	15	108
90	45	LP	F	Cre+		0	30	105
90	45	LP	F	Cre+		0	45	99
90	45	LP	F	Cre+		0	60	121
90	45	LP	F	Cre+		0	90	163
91	46	LC	M	Cre-	32.4	97.2	0	162
91	46	LC	M	Cre-		0	15	95
91	46	LC	M	Cre-		0	30	84
91	46	LC	M	Cre-		0	45	82
91	46	LC	M	Cre-		0	60	88
91	46	LC	M	Cre-		0	90	131
91	47	RC	M	Cre+	36.5	109.5	0	135
91	47	RC	M	Cre+		0	15	95
91	47	RC	M	Cre+		0	30	149
91	47	RC	M	Cre+		0	45	100
91	47	RC	M	Cre+		0	60	101
91	47	RC	M	Cre+		0	90	118
91	48	BC	M	Cre-	35	105	0	115
91	48	BC	M	Cre-		0	15	130
91	48	BC	M	Cre-		0	30	99
91	48	BC	M	Cre-		0	45	97
91	48	BC	M	Cre-		0	60	120
91	48	BC	M	Cre-		0	90	162
92	49	LC	M	Cre-	36.9	110.7	0	140
92	49	LC	M	Cre-		0	15	119
92	49	LC	M	Cre-		0	30	98
92	49	LC	M	Cre-		0	45	105
92	49	LC	M	Cre-		0	60	115
92	49	LC	M	Cre-		0	90	142
92	50	RC	M	Cre+	33.3	99.9	0	109
92	50	RC	M	Cre+		0	15	195
92	50	RC	M	Cre+		0	30	93
92	50	RC	M	Cre+		0	45	86
92	50	RC	M	Cre+		0	60	89
92	50	RC	M	Cre+		0	90	105
92	51	BC	M	Cre-	39.3	117.9	0	123
92	51	BC	M	Cre-		0	15	111
92	51	BC	M	Cre-		0	30	99
92	51	BC	M	Cre-		0	45	99
92	51	BC	M	Cre-		0	60	112
92	51	BC	M	Cre-		0	90	120
93	52	LC	M	Cre-	37.8	113.4	0	178
93	52	LC	M	Cre-		0	15	161
93	52	LC	M	Cre-		0	30	117
93	52	LC	M	Cre-		0	45	133
93	52	LC	M	Cre-		0	60	116
93	52	LC	M	Cre-		0	90	131
93	53	RC	M	Cre-	34.2	102.6	0	179
93	53	RC	M	Cre-		0	15	130
93	53	RC	M	Cre-		0	30	105
93	53	RC	M	Cre-		0	45	109
93	53	RC	M	Cre-		0	60	106
93	53	RC	M	Cre-		0	90	127
93	54	BC	M	Cre-	38.9	116.7	0	109
93	54	BC	M	Cre-		0	15	94
93	54	BC	M	Cre-		0	30	108
93	54	BC	M	Cre-		0	45	106
93	54	BC	M	Cre-		0	60	102
93	54	BC	M	Cre-		0	90	159
93	55	LP	M	Cre-	36	108	0	110
93	55	LP	M	Cre-		0	15	120
93	55	LP	M	Cre-		0	30	91
93	55	LP	M	Cre-		0	45	147
93	55	LP	M	Cre-		0	60	97
93	55	LP	M	Cre-		0	90	119
93	56	RP	M	Cre+	30.2	90.6	0	111
93	56	RP	M	Cre+		0	15	77
93	56	RP	M	Cre+		0	30	74
93	56	RP	M	Cre+		0	45	90
93	56	RP	M	Cre+		0	60	77
93	56	RP	M	Cre+		0	90	125
94	57	LC	F	Cre+	21.4	64.2	0	156
94	57	LC	F	Cre+		0	15	106
94	57	LC	F	Cre+		0	30	79
94	57	LC	F	Cre+		0	45	109
94	57	LC	F	Cre+		0	60	118
94	57	LC	F	Cre+		0	90	163
94	58	RC	F	Cre+	22.4	67.2	0	124
94	58	RC	F	Cre+		0	15	78
94	58	RC	F	Cre+		0	30	125
94	58	RC	F	Cre+		0	45	104
94	58	RC	F	Cre+		0	60	118
94	58	RC	F	Cre+		0	90	155

## Sheet: GTT_Raw_Value
From_Box	Mouse_index	Mark	Sex	Genotype	Mass (g)	Glucose (ul)	Time	Glucose_mgdl
79	1	LC	F	Cre-	22.6	90.4	0	86
79	1	LC	F	Cre-		0	10	210
79	1	LC	F	Cre-		0	20	359
79	1	LC	F	Cre-		0	30	182
79	1	LC	F	Cre-		0	60	121
79	1	LC	F	Cre-		0	90	112
79	1	LC	F	Cre-		0	120	132
79	2	RC	F	Cre+	22.2	88.8	0	168
79	2	RC	F	Cre+		0	10	182
79	2	RC	F	Cre+		0	20	155
79	2	RC	F	Cre+		0	30	211
79	2	RC	F	Cre+		0	60	91
79	2	RC	F	Cre+		0	90	83
79	2	RC	F	Cre+		0	120	69
79	3	BC	F	Cre-	22.6	90.4	0	94
79	3	BC	F	Cre-		0	10	154
79	3	BC	F	Cre-		0	20	182
79	3	BC	F	Cre-		0	30	187
79	3	BC	F	Cre-		0	60	123
79	3	BC	F	Cre-		0	90	120
79	3	BC	F	Cre-		0	120	109
80	4	LC	F	Cre-	24.6	98.4	0	83
80	4	LC	F	Cre-		0	10	248
80	4	LC	F	Cre-		0	20	184
80	4	LC	F	Cre-		0	30	149
80	4	LC	F	Cre-		0	60	138
80	4	LC	F	Cre-		0	90	123
80	4	LC	F	Cre-		0	120	127
80	5	RC	F	Cre+	24.9	99.6	0	143
80	5	RC	F	Cre+		0	10	136
80	5	RC	F	Cre+		0	20	142
80	5	RC	F	Cre+		0	30	138
80	5	RC	F	Cre+		0	60	92
80	5	RC	F	Cre+		0	90	80
80	5	RC	F	Cre+		0	120	79
81	6	BC+LP	M	Cre-	36.7	146.8	0	169
81	6	BC+LP	M	Cre-			10	454
81	6	BC+LP	M	Cre-			20	266
81	6	BC+LP	M	Cre-			30	257
81	6	BC+LP	M	Cre-			60	223
81	6	BC+LP	M	Cre-			90	151
81	6	BC+LP	M	Cre-			120	247
81	7	LC	M	Cre+	33.1	132.4	0	246
81	7	LC	M	Cre+			10	374
81	7	LC	M	Cre+			20	325
81	7	LC	M	Cre+			30	269
81	7	LC	M	Cre+			60	198
81	7	LC	M	Cre+			90	176
81	7	LC	M	Cre+			120	218
81	8	RC	M	Cre+	36.6	146.4	0	193
81	8	RC	M	Cre+			10	249
81	8	RC	M	Cre+			20	363
81	8	RC	M	Cre+			30	247
81	8	RC	M	Cre+			60	219
81	8	RC	M	Cre+			90	143
81	8	RC	M	Cre+			120	240
81	9	BC	M	Cre+	36.1	144.4	0	143
81	9	BC	M	Cre+			10	283
81	9	BC	M	Cre+			20	275
81	9	BC	M	Cre+			30	227
81	9	BC	M	Cre+			60	150
81	9	BC	M	Cre+			90	226
81	9	BC	M	Cre+			120	183
82	10	LC	M	Cre+	33.3	133.2	0	148
82	10	LC	M	Cre+			10	209
82	10	LC	M	Cre+			20	252
82	10	LC	M	Cre+			30	279
82	10	LC	M	Cre+			60	141
82	10	LC	M	Cre+			90	146
82	10	LC	M	Cre+			120	238
82	11	RC	M	Cre+	31.8	127.2	0	199
82	11	RC	M	Cre+			10	412
82	11	RC	M	Cre+			20	273
82	11	RC	M	Cre+			30	261
82	11	RC	M	Cre+			60	188
82	11	RC	M	Cre+			90	127
82	11	RC	M	Cre+			120	129
82	12	BC	M	Cre+	38.5	154	0	126
82	12	BC	M	Cre+			10	391
82	12	BC	M	Cre+			20	444
82	12	BC	M	Cre+			30	333
82	12	BC	M	Cre+			60	166
82	12	BC	M	Cre+			90	143
82	12	BC	M	Cre+			120	194
82	13	LP	M	Cre-	30.7	122.8	0	149
82	13	LP	M	Cre-			10	304
82	13	LP	M	Cre-			20	367
82	13	LP	M	Cre-			30	211
82	13	LP	M	Cre-			60	182
82	13	LP	M	Cre-			90	153
82	13	LP	M	Cre-			120	161
82	14	RP	M	Cre+	31.9	127.6	0	169
82	14	RP	M	Cre+			10	406
82	14	RP	M	Cre+			20	265
82	14	RP	M	Cre+			30	331
82	14	RP	M	Cre+			60	444
82	14	RP	M	Cre+			90	344
82	14	RP	M	Cre+			120	455
83	15	LC	F	Cre+	22.7	90.8	0	155
83	15	LC	F	Cre+		0	10	242
83	15	LC	F	Cre+		0	20	231
83	15	LC	F	Cre+		0	30	158
83	15	LC	F	Cre+		0	60	110
83	15	LC	F	Cre+		0	90	109
83	15	LC	F	Cre+		0	120	96
83	16	RC	F	Cre-	21.2	84.8	0	88
83	16	RC	F	Cre-		0	10	339
83	16	RC	F	Cre-		0	20	139
83	16	RC	F	Cre-		0	30	136
83	16	RC	F	Cre-		0	60	132
83	16	RC	F	Cre-		0	90	146
83	16	RC	F	Cre-		0	120	136
83	17	BC	F	Cre-	23.5	94	0	101
83	17	BC	F	Cre-		0	10	241
83	17	BC	F	Cre-		0	20	247
83	17	BC	F	Cre-		0	30	151
83	17	BC	F	Cre-		0	60	125
83	17	BC	F	Cre-		0	90	126
83	17	BC	F	Cre-		0	120	145
83	18	LP	F	Cre-	23.4	93.6	0	117
83	18	LP	F	Cre-		0	10	322
83	18	LP	F	Cre-		0	20	343
83	18	LP	F	Cre-		0	30	206
83	18	LP	F	Cre-		0	60	107
83	18	LP	F	Cre-		0	90	101
83	18	LP	F	Cre-		0	120	105
83	19	RP	F	Cre-	25.1	100.4	0	123
83	19	RP	F	Cre-		0	10	234
83	19	RP	F	Cre-		0	20	220
83	19	RP	F	Cre-		0	30	149
83	19	RP	F	Cre-		0	60	100
83	19	RP	F	Cre-		0	90	106
83	19	RP	F	Cre-		0	120	116
84	20	LC	M	Cre+	33.4	133.6	0	158
84	20	LC	M	Cre+			10	322
84	20	LC	M	Cre+			20	318
84	20	LC	M	Cre+			30	265
84	20	LC	M	Cre+			60	186
84	20	LC	M	Cre+			90	188
84	20	LC	M	Cre+			120	208
84	21	RC	M	Cre+	34.4	137.6	0	159
84	21	RC	M	Cre+			10	240
84	21	RC	M	Cre+			20	292
84	21	RC	M	Cre+			30	277
84	21	RC	M	Cre+			60	197
84	21	RC	M	Cre+			90	194
84	21	RC	M	Cre+			120	174
84	22	BC	M	Cre-	35.5	142	0	148
84	22	BC	M	Cre-			10	342
84	22	BC	M	Cre-			20	424
84	22	BC	M	Cre-			30	353
84	22	BC	M	Cre-			60	240
84	22	BC	M	Cre-			90	195
84	22	BC	M	Cre-			120	207
85	23	LC	F	Cre-	22	88	0	135
85	23	LC	F	Cre-		0	10	249
85	23	LC	F	Cre-		0	20	169
85	23	LC	F	Cre-		0	30	145
85	23	LC	F	Cre-		0	60	112
85	23	LC	F	Cre-		0	90	144
85	23	LC	F	Cre-		0	120	132
85	24	RC	F	Cre+	22.1	88.4	0	85
85	24	RC	F	Cre+		0	10	231
85	24	RC	F	Cre+		0	20	189
85	24	RC	F	Cre+		0	30	133
85	24	RC	F	Cre+		0	60	129
85	24	RC	F	Cre+		0	90	118
85	24	RC	F	Cre+		0	120	125
86	25	LC	M	Cre-	31.5	126	0	216
86	25	LC	M	Cre-			10	261
86	25	LC	M	Cre-			20	239
86	25	LC	M	Cre-			30	235
86	25	LC	M	Cre-			60	176
86	25	LC	M	Cre-			90	182
86	25	LC	M	Cre-			120	147
86	26	RC	M	Cre+	31.6	126.4	0	130
86	26	RC	M	Cre+			10	364
86	26	RC	M	Cre+			20	206
86	26	RC	M	Cre+			30	212
86	26	RC	M	Cre+			60	127
86	26	RC	M	Cre+			90	118
86	26	RC	M	Cre+			120	111
86	27	BC	M	Cre+	29.1	116.4	0	118
86	27	BC	M	Cre+			10	256
86	27	BC	M	Cre+			20	210
86	27	BC	M	Cre+			30	239
86	27	BC	M	Cre+			60	114
86	27	BC	M	Cre+			90	112
86	27	BC	M	Cre+			120	131
86	28	LP	M	Cre+	29.5	118	0	153
86	28	LP	M	Cre+			10	271
86	28	LP	M	Cre+			20	250
86	28	LP	M	Cre+			30	366
86	28	LP	M	Cre+			60	180
86	28	LP	M	Cre+			90	145
86	28	LP	M	Cre+			120	136
86	29	RP	M	Cre+	34.4	137.6	0	185
86	29	RP	M	Cre+			10	268
86	29	RP	M	Cre+			20	265
86	29	RP	M	Cre+			30	285
86	29	RP	M	Cre+			60	161
86	29	RP	M	Cre+			90	153
86	29	RP	M	Cre+			120	170
87	30	LC	F	Cre-	22.9	91.6	0	119
87	30	LC	F	Cre-		0	10	282
87	30	LC	F	Cre-		0	20	237
87	30	LC	F	Cre-		0	30	250
87	30	LC	F	Cre-		0	60	133
87	30	LC	F	Cre-		0	90	166
87	30	LC	F	Cre-		0	120	121
87	31	RC	F	Cre+	27	108	0	107
87	31	RC	F	Cre+		0	10	308
87	31	RC	F	Cre+		0	20	338
87	31	RC	F	Cre+		0	30	279
87	31	RC	F	Cre+		0	60	153
87	31	RC	F	Cre+		0	90	148
87	31	RC	F	Cre+		0	120	115
87	32	BC	F	Cre+	24.2	96.8	0	96
87	32	BC	F	Cre+		0	15	322
87	32	BC	F	Cre+		0	30	314
87	32	BC	F	Cre+		0	45	217
87	32	BC	F	Cre+		0	60	145
87	32	BC	F	Cre+		0	90	119
87	32	BC	F	Cre+		0	120	132
87	33	LP	F	Cre-	21.9	87.6	0	107
87	33	LP	F	Cre-		0	15	204
87	33	LP	F	Cre-		0	30	292
87	33	LP	F	Cre-		0	45	210
87	33	LP	F	Cre-		0	60	174
87	33	LP	F	Cre-		0	90	158
87	33	LP	F	Cre-		0	120	112
87	34	RP	F	Cre+	24.5	98	0	167
87	34	RP	F	Cre+		0	15	150
87	34	RP	F	Cre+		0	30	196
87	34	RP	F	Cre+		0	45	171
87	34	RP	F	Cre+		0	60	208
87	34	RP	F	Cre+		0	90	135
87	34	RP	F	Cre+		0	120	131
88	35	LC	M	Cre-	40.8	163.2	0	245
88	35	LC	M	Cre-			10	535
88	35	LC	M	Cre-			20	522
88	35	LC	M	Cre-			30	368
88	35	LC	M	Cre-			60	252
88	35	LC	M	Cre-			90	209
88	35	LC	M	Cre-			120	192
88	36	RC	M	Cre-	41.1	164.4	0	271
88	36	RC	M	Cre-			10	248
88	36	RC	M	Cre-			20	396
88	36	RC	M	Cre-			30	318
88	36	RC	M	Cre-			60	229
88	36	RC	M	Cre-			90	294
88	36	RC	M	Cre-			120	231
89	37	LC	F	Cre+	22.4	89.6	0	138
89	37	LC	F	Cre+		0	15	192
89	37	LC	F	Cre+		0	30	234
89	37	LC	F	Cre+		0	45	175
89	37	LC	F	Cre+		0	60	120
89	37	LC	F	Cre+		0	90	112
89	37	LC	F	Cre+		0	120	107
89	38	RC	F	Cre+	22.9	91.6	0	97
89	38	RC	F	Cre+		0	15	146
89	38	RC	F	Cre+		0	30	173
89	38	RC	F	Cre+		0	45	153
89	38	RC	F	Cre+		0	60	125
89	38	RC	F	Cre+		0	90	122
89	38	RC	F	Cre+		0	120	152
89	39	BC	F	Cre+	23.7	94.8	0	95
89	39	BC	F	Cre+		0	15	266
89	39	BC	F	Cre+		0	30	298
89	39	BC	F	Cre+		0	45	248
89	39	BC	F	Cre+		0	60	179
89	39	BC	F	Cre+		0	90	162
89	39	BC	F	Cre+		0	120	178
89	40	LP	F	Cre+	24.3	97.2	0	109
89	40	LP	F	Cre+		0	15	151
89	40	LP	F	Cre+		0	30	183
89	40	LP	F	Cre+		0	45	160
89	40	LP	F	Cre+		0	60	132
89	40	LP	F	Cre+		0	90	107
89	40	LP	F	Cre+		0	120	120
89	41	RP	F	Cre+	23.1	92.4	0	119
89	41	RP	F	Cre+		0	15	151
89	41	RP	F	Cre+		0	30	174
89	41	RP	F	Cre+		0	45	212
89	41	RP	F	Cre+		0	60	112
89	41	RP	F	Cre+		0	90	105
89	41	RP	F	Cre+		0	120	110
90	42	LC	F	Cre+	25.6	102.4	0	126
90	42	LC	F	Cre+		0	15	243
90	42	LC	F	Cre+		0	30	177
90	42	LC	F	Cre+		0	45	138
90	42	LC	F	Cre+		0	60	135
90	42	LC	F	Cre+		0	90	142
90	42	LC	F	Cre+		0	120	122
90	43	RC	F	Cre+	21.3	85.2	0	85
90	43	RC	F	Cre+		0	15	146
90	43	RC	F	Cre+		0	30	182
90	43	RC	F	Cre+		0	45	170
90	43	RC	F	Cre+		0	60	98
90	43	RC	F	Cre+		0	90	87
90	43	RC	F	Cre+		0	120	100
90	44	BC	F	Cre-	25.3	101.2	0	107
90	44	BC	F	Cre-		0	15	322
90	44	BC	F	Cre-		0	30	266
90	44	BC	F	Cre-		0	45	228
90	44	BC	F	Cre-		0	60	140
90	44	BC	F	Cre-		0	90	119
90	44	BC	F	Cre-		0	120	181
90	45	LP	F	Cre+	23.3	93.2	0	91
90	45	LP	F	Cre+		0	15	258
90	45	LP	F	Cre+		0	30	276
90	45	LP	F	Cre+		0	45	254
90	45	LP	F	Cre+		0	60	140
90	45	LP	F	Cre+		0	90	120
90	45	LP	F	Cre+		0	120	127
91	46	LC	M	Cre-	32.2	128.8	0	130
91	46	LC	M	Cre-			10	366
91	46	LC	M	Cre-			20	374
91	46	LC	M	Cre-			30	245
91	46	LC	M	Cre-			60	186
91	46	LC	M	Cre-			90	152
91	46	LC	M	Cre-			120	177
91	47	RC	M	Cre+	34.9	139.6	0	91
91	47	RC	M	Cre+			10	165
91	47	RC	M	Cre+			20	155
91	47	RC	M	Cre+			30	141
91	47	RC	M	Cre+			60	125
91	47	RC	M	Cre+			90	99
91	47	RC	M	Cre+			120	108
91	48	BC	M	Cre-	34.2	136.8	0	117
91	48	BC	M	Cre-			10	223
91	48	BC	M	Cre-			20	242
91	48	BC	M	Cre-			30	236
91	48	BC	M	Cre-			60	179
91	48	BC	M	Cre-			90	147
91	48	BC	M	Cre-			120	144
92	49	LC	M	Cre-	35.4	141.6	0	153
92	49	LC	M	Cre-			10	184
92	49	LC	M	Cre-			20	278
92	49	LC	M	Cre-			30	312
92	49	LC	M	Cre-			60	205
92	49	LC	M	Cre-			90	151
92	49	LC	M	Cre-			120	148
92	50	RC	M	Cre+	31.8	127.2	0	112
92	50	RC	M	Cre+			10	287
92	50	RC	M	Cre+			20	426
92	50	RC	M	Cre+			30	363
92	50	RC	M	Cre+			60	229
92	50	RC	M	Cre+			90	205
92	50	RC	M	Cre+			120	168
92	51	BC	M	Cre-	36.9	147.6	0	135
92	51	BC	M	Cre-			10	245
92	51	BC	M	Cre-			20	237
92	51	BC	M	Cre-			30	309
92	51	BC	M	Cre-			60	246
92	51	BC	M	Cre-			90	162
92	51	BC	M	Cre-			120	150
93	52	LC	M	Cre-	37.8	151.2	0	212
93	52	LC	M	Cre-			10	307
93	52	LC	M	Cre-			20	290
93	52	LC	M	Cre-			30	352
93	52	LC	M	Cre-			60	379
93	52	LC	M	Cre-			90	204
93	52	LC	M	Cre-			120	159
93	53	RC	M	Cre-	32.1	128.4	0	128
93	53	RC	M	Cre-			10	317
93	53	RC	M	Cre-			20	368
93	53	RC	M	Cre-			30	327
93	53	RC	M	Cre-			60	272
93	53	RC	M	Cre-			90	181
93	53	RC	M	Cre-			120	250
93	54	BC	M	Cre-	38.5	154	0	216
93	54	BC	M	Cre-			10	356
93	54	BC	M	Cre-			20	291
93	54	BC	M	Cre-			30	358
93	54	BC	M	Cre-			60	258
93	54	BC	M	Cre-			90	231
93	54	BC	M	Cre-			120	210
93	55	LP	M	Cre-	35.8	143.2	0	146
93	55	LP	M	Cre-			10	245
93	55	LP	M	Cre-			20	242
93	55	LP	M	Cre-			30	247
93	55	LP	M	Cre-			60	195
93	55	LP	M	Cre-			90	191
93	55	LP	M	Cre-			120	160
93	56	RP	M	Cre+	29.5	118	0	86
93	56	RP	M	Cre+			10	101
93	56	RP	M	Cre+			20	162
93	56	RP	M	Cre+			30	214
93	56	RP	M	Cre+			60	127
93	56	RP	M	Cre+			90	126
93	56	RP	M	Cre+			120	100
94	57	LC	F	Cre+	21.1	84.4	0	140
94	57	LC	F	Cre+		0	15	156
94	57	LC	F	Cre+		0	30	117
94	57	LC	F	Cre+		0	45	140
94	57	LC	F	Cre+		0	60	122
94	57	LC	F	Cre+		0	90	112
94	57	LC	F	Cre+		0	120	88
94	58	RC	F	Cre+	22.6	90.4	0	109
94	58	RC	F	Cre+		0	15	190
94	58	RC	F	Cre+		0	30	212
94	58	RC	F	Cre+		0	45	188
94	58	RC	F	Cre+		0	60	122
94	58	RC	F	Cre+		0	90	105
94	58	RC	F	Cre+		0	120	85
